# Supplementary material for: Ribosome profiling uncovers selective mRNA translation associated with eIF2 phosphorylation in erythroid progenitors
Source: PLoS One. 2018 Apr 10;13(4):e0193790. doi: 10.1371/journal.pone.0193790 (PMC5892948; doi:10.1371/journal.pone.0193790)
Supplement: S2 Table — 2Log normalized RFP reads (cpm) of the CDS of all transcripts in Tm-treated cells were compared to untreated cells. List of significantly altered transcripts during Tm treatment in erythroblasts, cpm values are given for each sample for ribosome profiling and RNAseq. (XLSX) [file pone.0193790.s010.xlsx]

## Sheet: Sheet1
Table S2
	CDS			CDS												CDS
gene name	FoldChange interaction 2Log	Bonferroni interaction	FDR interaction	footprint reads (cpm) untreated			footprint reads (cpm) Tm-treated			RNAseq cpm untreated			RNAseq (cpm) Tm-treated			Average RFP cpm untreated	Average RFP cpm untreated	Average RFP cpm Tm-treated	Average RFP cpm Tm-treated	Average RNAseq untreated	Average RNAseq untreated	Average RNAseq Tm-treated	Average RNAseq Tm-treated	Fc-ribo	Fc-seq
				a1	b1	c1	a3	b3	c3	u1	u2	u3	t1	t2	t3		2log		2log		2log		2log
Atf4	1.95918	1.08929e-36	1.08929e-36	68.5087	69.8485	74.3208	256.3	313.853	347.599	189.81	192.947	171.522	194.355	218.052	202.389	70.8927	6.14756	305.917	8.257	184.76	7.52951	204.932	7.679	2.10943	0.149494
Hspa5	-0.548761	1.18307e-15	3.19749e-17	1508.31	1666.22	1777.49	1763.29	1952.38	2054.34	157.34	170.951	185.839	260.311	304.595	311.786	1650.67	10.6888	1923.34	10.9094	171.377	7.42103	292.231	8.19096	0.220556	0.769936
Scoc	1.46003	1.77743e-08	7.8301e-11	8.52863	6.2313	7.64855	16.2238	18.5088	24.3475	17.8665	15.1008	14.2395	15.1193	15.0495	15.2619	7.46949	2.90101	19.6934	4.29964	15.7356	3.97596	15.1436	3.92063	1.39863	-0.0553251
Ibtk	1.04425	4.63745e-08	1.80446e-10	11.8842	13.1872	14.2869	21.6926	25.2754	31.4272	25.9325	23.3264	25.4443	23.9967	23.507	24.8888	13.1194	3.71363	26.1317	4.70773	24.901	4.63813	24.1308	4.59281	0.9941	-0.0453276
Hbs1l	-0.548604	1.2962e-07	4.50068e-10	167.357	171.578	169.567	126.874	127.173	108.096	65.3732	67.0326	64.3239	67.0891	67.6941	69.5613	169.501	7.40515	120.714	6.91545	65.5766	6.03511	68.1148	6.0899	-0.489693	0.054788
Anapc1	-0.464404	5.31694e-07	1.54562e-09	574.634	543.717	533.811	490.361	433.265	412.007	104.164	93.7693	99.0537	117.834	101.696	111.055	550.721	9.10518	445.211	8.79835	98.9955	6.62929	110.195	6.78391	-0.306831	0.154623
Tnks2	-0.553458	9.48218e-07	2.54214e-09	122.197	109.7	116.604	82.9421	88.5635	77.3593	66.4465	59.0457	59.9406	69.4472	61.0105	63.6807	116.167	6.86006	82.955	6.37426	61.8109	5.94979	64.7128	6.01598	-0.485801	0.0661889
Pnrc2	1.04235	1.06544e-05	2.14375e-08	21.5313	21.0125	21.6468	32.4477	36.2215	52.1485	52.8949	55.8605	53.2488	43.9709	49.4058	54.7447	21.3969	4.41933	40.2726	5.33172	54.0014	5.75492	49.3738	5.62567	0.912396	-0.129251
Ddit3	1.55377	1.15115e-05	2.3e-08	5.31292	5.50673	3.89643	17.6822	26.0715	32.8086	19.2434	20.9187	19.2194	25.8231	40.1816	39.859	4.90536	2.29436	25.5208	4.6736	19.7938	4.30698	35.2879	5.1411	2.37924	0.834123
Ppp1r15a	0.91663	2.74749e-05	4.93265e-08	10.3462	15.5058	13.854	20.9634	26.8676	32.8086	32.9793	38.1816	35.5597	34.7698	40.3761	40.5115	13.2353	3.72632	26.8799	4.74845	35.5735	5.15273	38.5525	5.26875	1.02213	0.116019
Pcsk6	-0.673222	4.4056e-05	7.62214e-08	47.257	35.7937	39.9745	31.5362	26.8676	23.1387	17.9532	15.3327	15.5363	18.772	16.1138	16.4518	41.0084	5.35785	27.1809	4.76452	16.2741	4.0245	17.1125	4.09698	-0.593329	0.0724795
Ost4	0.793275	4.76768e-05	8.12211e-08	53.968	46.2275	49.9321	72.3693	73.6371	89.1014	40.5141	46.5027	43.8596	37.6827	40.8454	39.6363	50.0425	5.64508	78.3692	6.29222	43.6254	5.4471	39.3881	5.29969	0.647132	-0.147409
Usmg5	1.512	7.28407e-05	1.1844e-07	52.8495	39.7064	61.91	98.9837	132.746	187.009	93.5932	81.0216	91.0132	91.1783	86.3944	72.1791	51.4886	5.68618	139.58	7.12494	88.5427	6.4683	83.2506	6.37939	1.43876	-0.0889121
Cep192	-0.478887	7.98055e-05	1.28926e-07	166.238	157.087	151.528	147.108	124.984	126.745	28.8596	25.0383	28.1417	33.6833	29.1834	32.5889	158.284	7.30637	132.946	7.05469	27.3466	4.77329	31.8185	4.99179	-0.25168	0.218507
Rbm17	-0.490871	8.61742e-05	1.37e-07	113.529	112.163	124.974	77.6557	90.1557	85.8205	76.5507	79.7803	77.6296	79.1106	80.2029	78.5357	116.889	6.86899	84.544	6.40163	77.9869	6.28516	79.2831	6.30894	-0.467363	0.0237818
Gtf2h5	0.614405	0.000105135	1.63507e-07	47.5366	53.7631	52.5297	72.7339	73.8361	77.7047	32.0578	34.1165	30.8392	29.8919	32.571	30.3395	51.2765	5.68022	74.7582	6.22416	32.3378	5.01515	30.9341	4.95113	0.543936	-0.0640242
Efr3a	-0.651326	0.000119737	1.8421e-07	87.2437	93.9042	92.7928	60.1558	61.895	54.3933	37.0123	36.1218	38.2572	37.1972	35.7297	39.5289	91.3136	6.51276	58.8147	5.8781	37.1304	5.21453	37.4853	5.22825	-0.634653	0.0137217
Dpm2	0.802784	0.000138777	2.09316e-07	17.4767	14.7812	17.6061	23.1509	25.2754	27.1103	23.6883	25.5635	22.5652	20.136	21.1036	21.3574	16.6213	4.05496	25.1789	4.65414	23.939	4.58129	20.8657	4.38306	0.599177	-0.198233
Ifrd1	0.845688	0.000210403	3.00147e-07	85.2863	85.789	76.1969	131.614	151.852	164.216	60.2344	53.8553	54.5716	61.7719	57.9091	50.9753	82.4241	6.36499	149.227	7.22137	56.2204	5.81302	56.8854	5.82999	0.856371	0.0169643
Sepw1	0.883768	0.000219338	3.11117e-07	99.4075	99.7008	91.9269	122.681	156.628	181.484	68.7124	77.4681	65.9839	54.2816	64.4439	62.6827	97.0117	6.60009	153.598	7.26301	70.7215	6.14408	60.4694	5.91813	0.662926	-0.225943
Hsd17b12	-0.427604	0.000228417	3.22168e-07	302.557	346.634	303.633	251.561	258.924	260.397	58.8359	61.4125	64.6611	66.28	67.82	66.9434	317.608	8.3111	256.961	8.0054	61.6365	5.94571	67.0145	6.0664	-0.3057	0.120688
Csde1	-0.834189	0.000290457	3.99e-07	602.597	611.682	469.881	423.096	394.655	309.437	109.541	99.0211	106.549	127.012	119.858	127.953	561.386	9.13285	375.729	8.55355	105.037	6.71476	124.941	6.9651	-0.5793	0.250344
Mllt1	-0.696423	0.00047117	6.17523e-07	36.771	37.098	42.5721	22.4217	24.6784	20.5486	31.1797	34.2188	32.1879	28.3661	31.3922	31.9593	38.8137	5.27849	22.5496	4.49503	32.5288	5.02365	30.5725	4.93416	-0.783467	-0.0894812
Cul3	-0.431534	0.000489628	6.4e-07	220.766	234.471	205.645	183.384	184.889	169.569	73.8295	70.061	70.886	84.3816	75.5679	75.772	220.294	7.78329	179.281	7.48608	71.5921	6.16173	78.5738	6.29598	-0.297209	0.134247
Wac	-0.75154	0.000492202	6.42561e-07	41.8043	51.4444	44.3039	31.1717	31.445	28.6644	61.9365	56.8631	57.3209	69.5859	62.67	64.387	45.8509	5.51888	30.427	4.92728	58.7069	5.87546	65.5476	6.03447	-0.591595	0.159014
E430025E21Rik	-0.588194	0.000515542	6.63504e-07	95.4927	77.2391	77.9286	65.6245	60.5018	52.6665	25.8241	21.0074	22.6949	27.9962	23.2323	23.0847	83.5535	6.38463	59.5976	5.89718	23.1755	4.53453	24.7711	4.63058	-0.487445	0.0960585
Slc35a4	1.84175	0.000578175	7.27265e-07	0.978695	1.15931	2.02037	2.91665	4.37842	5.00763	106.169	110.193	96.0968	83.9654	84.9524	90.0819	1.38613	0.471059	4.1009	2.03594	104.153	6.70256	86.3332	6.43184	1.56488	-0.270718
Cenpa	0.670355	0.000654821	8.10422e-07	27.4035	31.7361	30.7385	41.0153	45.7744	40.5791	63.3134	64.7682	59.8887	58.6047	56.6387	52.2573	29.9594	4.90494	42.4563	5.40791	62.6568	5.9694	55.8336	5.80306	0.502971	-0.166337
Ctbp2	-0.595375	0.000775949	9.33753e-07	48.2357	54.1978	49.9321	36.8227	35.0274	33.672	13.5842	13.4979	12.9167	14.2871	13.8135	13.8416	50.7885	5.66643	35.174	5.13644	13.3329	3.73692	13.9807	3.80537	-0.529992	0.0684463
Sat1	0.992177	0.000796165	9.56929e-07	6.71105	7.68044	8.94736	14.7655	13.5333	15.8863	11.2316	12.0724	10.2451	9.68654	11.3415	11.2468	7.77962	2.9597	14.7284	3.88053	11.1831	3.48324	10.7583	3.42737	0.920827	-0.0558685
Med24	1.71989	0.00132774	1.49521e-06	753.316	1099.17	464.397	1577.18	4014.02	1614.01	43.2569	42.158	40.799	38.0064	38.0758	39.621	772.295	9.59301	2401.74	11.2299	42.0713	5.39476	38.5677	5.26932	1.63685	-0.125443
Ttc13	-0.581544	0.00149268	1.65669e-06	95.6325	101.295	94.2359	72.5516	72.0449	64.0632	23.027	23.0535	24.2771	24.9677	24.5827	25.5798	97.0544	6.60072	69.5532	6.12005	23.4525	4.55167	25.0434	4.64636	-0.480676	0.0946859
Gtf2h1	-0.428195	0.00205826	2.218e-06	157.989	158.971	145.034	128.332	116.625	115.694	99.621	94.3013	92.3878	97.4896	99.8989	102.795	153.998	7.26677	120.217	6.9095	95.4367	6.57647	100.061	6.64474	-0.357269	0.0682658
Calr	-0.324806	0.00252294	2.65294e-06	1486.92	1590.58	1750.51	1476.55	1469.56	1655.97	170.48	187.17	202.491	203.44	222.023	244.105	1609.33	10.6522	1534.03	10.5831	186.714	7.54468	223.19	7.80213	-0.069139	0.257443
Atp6v1c1	-0.55904	0.00258	2.6903e-06	100.386	102.454	101.163	77.6557	72.642	68.0348	26.6805	28.2508	27.7267	29.4526	28.3823	29.5564	101.334	6.66298	72.7775	6.18542	27.5527	4.78412	29.1305	4.86446	-0.47756	0.0803353
Cacybp	-0.391037	0.00257302	2.6903e-06	279.208	341.707	313.446	234.79	243.002	259.706	119.081	123.009	130.982	123.544	130.81	132.259	311.454	8.28287	245.833	7.94153	124.357	6.95835	128.871	7.00979	-0.34134	0.0514363
Cela1	1.02719	0.00344118	3.44118e-06	52.2903	39.9962	64.3633	77.6557	102.296	104.642	77.0494	87.1465	73.5835	66.1181	75.7052	69.9912	52.2166	5.70644	94.8646	6.5678	79.2598	6.30852	70.6049	6.1417	0.861362	-0.166821
Tcp1	-0.31473	0.00370964	3.66928e-06	2089.93	2353.4	2024.7	1875.77	1966.51	1732.81	333.685	345.292	330.205	351.235	368.169	362.27	2156.01	11.0741	1858.36	10.8598	336.394	8.39401	360.558	8.49409	-0.214333	0.10008
Map4k4	-0.749675	0.00373276	3.6885e-06	91.9973	80.7171	81.1035	61.9787	59.9048	43.1693	40.1021	36.7288	41.3956	46.1209	40.8454	41.7705	84.606	6.40269	55.0176	5.78182	39.4088	5.30045	42.9123	5.42332	-0.620866	0.122871
Ncor2	-0.621686	0.00394393	3.87039e-06	36.0719	29.9972	31.4601	28.9842	19.9019	20.8939	25.694	22.3033	24.1993	28.5741	24.4797	26.1862	32.5097	5.0228	23.26	4.53978	24.0655	4.5889	26.4134	4.7232	-0.48302	0.134302
Fut8	-0.419799	0.00618849	5.73009e-06	128.069	133.9	143.879	93.6973	102.893	106.542	87.2402	86.8941	101.181	91.4789	84.0025	99.2098	135.283	7.07984	101.044	6.65884	91.7716	6.51998	91.5637	6.5167	-0.420998	-0.00327183
Myo18a	-0.681366	0.00695783	6.33105e-06	56.0652	49.9953	50.6536	49.0361	37.8136	34.7081	21.5959	15.244	18.7006	27.5801	18.7804	22.1942	52.2381	5.70703	40.5193	5.34054	18.5135	4.21051	22.8515	4.51422	-0.366493	0.303713
Riok2	-0.367767	0.0112203	9.60646e-06	371.624	406.339	357.462	326.847	377.539	333.612	54.6078	54.435	52.7041	61.3789	65.5311	63.5732	378.475	8.56405	345.999	8.43463	53.9156	5.75263	63.4944	5.98856	-0.129428	0.235926
Nup210	-0.725942	0.0127478	1.07395e-05	219.787	185.055	205.212	158.41	128.566	103.434	36.5787	33.2298	34.4185	40.0639	33.498	36.1663	203.351	7.66783	130.137	7.02388	34.7423	5.11862	36.5761	5.19283	-0.643946	0.0742058
Atp6v1f	1.24113	0.0130625	1.09861e-05	29.5007	24.7803	46.7572	57.7861	66.2734	98.0806	26.3011	31.2451	25.548	23.858	27.3294	26.8848	33.6794	5.07379	74.0467	6.21036	27.698	4.79171	26.0241	4.70178	1.13657	-0.0899363
Dph3	0.782547	0.0142902	1.18986e-05	37.7497	38.9818	47.6231	55.234	57.9146	79.9495	30.0413	32.4182	30.8132	27.187	29.4581	27.714	41.4515	5.37335	64.366	6.00823	31.0909	4.95842	28.1197	4.81351	0.634874	-0.144912
Mrps14	0.362514	0.0159538	1.30555e-05	288.435	320.839	313.158	352.732	372.365	357.269	64.365	67.3941	62.7936	59.3214	62.0978	56.5411	307.478	8.26434	360.789	8.49501	64.8509	6.01906	59.3201	5.89045	0.230673	-0.128606
Dym	-0.58035	0.0179059	1.4417e-05	115.486	109.99	124.686	80.5723	85.5783	72.8697	37.9013	36.1218	39.4762	38.9542	37.5036	39.1834	116.721	6.86691	79.6734	6.31603	37.8331	5.24158	38.5471	5.26855	-0.550887	0.026972
N4bp2l1	0.721479	0.0194832	1.55493e-05	11.7443	12.0279	14.8642	15.4947	16.5186	20.8939	12.0014	11.786	12.8129	9.43224	9.70492	11.5001	12.8788	3.68692	17.6357	4.14043	12.2001	3.60882	10.2124	3.35225	0.453505	-0.256563
Nsmaf	-0.495236	0.0209599	1.65953e-05	107.377	105.497	95.6791	78.3849	73.6371	69.0708	50.8133	46.5436	44.2746	48.4096	47.1856	47.0753	102.851	6.68441	73.6976	6.20355	47.2105	5.56104	47.5568	5.57158	-0.480867	0.010545
Phf20l1	-0.700448	0.0211468	1.66642e-05	33.8349	32.1709	27.4193	27.5258	20.3	20.8939	17.1835	14.7052	14.6804	18.6333	17.2926	19.346	31.1417	4.96078	22.9066	4.51769	15.523	3.95634	18.424	4.20351	-0.443086	0.247176
Spcs1	0.677229	0.0221617	1.74091e-05	81.2317	77.6739	98.2767	118.671	124.188	149.366	56.9604	60.3689	58.5918	55.2757	57.5314	55.1823	85.7274	6.42168	130.742	7.03057	58.6404	5.87382	55.9965	5.80726	0.608889	-0.0665588
Faf1	-0.657214	0.0232895	1.81241e-05	199.654	174.042	169.278	134.713	134.537	113.794	29.5318	28.7419	30.4501	32.9435	32.2849	33.1953	180.991	7.49978	127.681	6.9964	29.5746	4.88629	32.8079	5.03597	-0.503373	0.149684
Sh3kbp1	-0.601403	0.02628	2.01177e-05	59.98	61.4435	58.5908	47.5778	37.6146	41.6152	19.9155	19.7592	22.0724	21.0145	20.829	23.8908	60.0048	5.90701	42.2692	5.40153	20.5824	4.36334	21.9114	4.45361	-0.505471	0.0902719
Tmub2	0.555538	0.026807	2.04166e-05	28.8016	30.1421	30.4499	38.6456	42.1921	41.7878	13.9094	15.4622	14.4988	12.3914	13.8364	14.7705	29.7979	4.89714	40.8752	5.35315	14.6235	3.87022	13.6661	3.77253	0.456015	-0.0976872
Trim37	-0.562766	0.0308435	2.30347e-05	78.5752	79.4128	75.1867	60.3381	52.5411	53.7026	48.0922	39.7299	43.8596	51.5768	44.2673	42.876	77.7249	6.28031	55.5273	5.79512	43.8939	5.45595	46.24	5.53107	-0.485181	0.0751228
Sqle	-0.327907	0.032	2.37741e-05	557.716	551.832	526.596	469.762	486.204	411.489	229.5	231.825	206.485	235.367	235.424	227.539	545.381	9.09112	455.819	8.83232	222.603	7.79833	232.777	7.8628	-0.258806	0.0644712
Ccdc137	0.678908	0.0333842	2.46196e-05	25.5859	25.6498	30.017	48.4892	42.5901	43.3419	36.9906	33.5777	30.2426	34.03	36.382	33.6406	27.0842	4.75938	44.8071	5.48566	33.6036	5.07055	34.6842	5.11621	0.726276	0.0456614
Son	0.345087	0.0371686	2.69729e-05	314.441	279.974	284.728	522.444	413.761	460.012	78.2636	63.3495	70.2376	93.0278	82.6978	87.5561	293.048	8.19499	465.406	8.86234	70.6169	6.14194	87.7606	6.4555	0.667354	0.31356
Cct6a	-0.293319	0.0379682	2.74611e-05	1830.58	1777.08	1776.48	1687.64	1638.92	1534.24	209.097	195.416	211.672	233.309	220.146	227.477	1794.71	10.8095	1620.27	10.662	205.395	7.68226	226.977	7.82641	-0.147522	0.144147
Vps35	-0.336664	0.0391163	2.82632e-05	578.409	545.021	483.879	495.465	467.695	424.095	90.0915	80.4282	78.0446	93.4439	86.8522	89.7211	535.77	9.06547	462.418	8.85306	82.8548	6.37251	90.0057	6.49194	-0.212414	0.119432
Hspa8	-0.386775	0.0420311	3.01298e-05	95.7723	113.178	121.367	77.6557	106.674	98.7713	346.153	423.906	447.077	386.976	466.374	506.582	110.106	6.78274	94.3671	6.56021	405.712	8.66431	453.311	8.82436	-0.222532	0.160045
Mapkapk5	-0.688665	0.0426545	3.05111e-05	23.4887	20.8676	18.472	13.8541	12.9362	11.0513	25.4121	25.3862	22.5134	23.3494	24.331	23.1385	20.9428	4.38838	12.6139	3.65694	24.4372	4.61101	23.6063	4.5611	-0.731439	-0.0499089
Herpud1	-0.701846	0.043398	3.09764e-05	37.7497	36.5183	40.2631	45.0257	61.4969	72.3517	11.8062	11.9838	13.8763	27.3026	33.8184	33.7404	38.177	5.25463	59.6248	5.89784	12.5554	3.65024	31.6205	4.98279	0.643207	1.33255
Smek2	-0.648812	0.045269	3.21741e-05	194.76	209.111	178.081	139.817	157.424	126.4	67.4223	66.9303	61.0299	74.302	71.1389	76.6625	193.984	7.5998	141.214	7.14173	65.1275	6.02519	74.0345	6.21013	-0.458061	0.18493
Ccnk	-0.537025	0.0470949	3.32591e-05	84.4474	89.9915	76.9185	59.4267	64.8803	51.9758	60.9175	59.2572	59.2403	62.3268	61.6972	58.1302	83.7858	6.38863	58.7609	5.87678	59.805	5.90219	60.7181	5.92405	-0.511849	0.0218606
Gid4	-0.609618	0.0472623	3.33302e-05	24.8868	24.3455	27.275	15.677	16.5186	18.4764	17.4654	18.702	20.2828	18.4252	17.8992	20.8968	25.5025	4.67256	16.8907	4.07815	18.8167	4.23394	19.0737	4.25352	-0.59441	0.0195709
Ago2	-0.652589	0.0483098	3.38778e-05	84.5872	70.5731	57.1477	55.5986	47.5656	39.543	35.8523	28.7965	30.8392	40.0177	29.1033	31.9747	70.7693	6.14505	47.5691	5.57195	31.8293	4.99228	33.6986	5.07461	-0.5731	0.0823309
Edem3	-0.490235	0.0494648	3.45425e-05	68.5087	78.6883	81.8251	53.0465	55.1283	54.9113	31.3423	32.3295	35.43	31.8338	32.3764	34.9073	76.3407	6.25438	54.362	5.76453	33.034	5.04588	33.0392	5.04611	-0.489852	0.000228445
1110008F13Rik	0.386448	0.0517717	3.60527e-05	106.119	104.773	103.183	135.442	117.222	112.931	137.349	132.94	129.374	127.913	120.156	108.146	104.692	6.71	121.865	6.92914	133.221	7.05768	118.738	6.89164	0.219139	-0.166036
Tmem258	0.616889	0.0523018	3.6346e-05	83.7483	104.918	115.161	118.124	137.92	143.495	42.5956	49.797	48.6061	38.6075	42.8367	39.7361	101.276	6.66214	133.18	7.05723	46.9996	5.55458	40.3934	5.33605	0.395086	-0.218527
Tsc22d2	-0.651128	0.0533229	3.68761e-05	33.8349	35.7937	33.9134	23.1509	25.0764	19.5125	19.612	16.6286	19.5306	19.9279	18.0937	18.7395	34.514	5.10911	22.5799	4.49697	18.5904	4.21648	18.9204	4.24187	-0.612141	0.0253859
Mast2	-0.765548	0.0578782	3.95613e-05	18.036	16.81	16.7402	10.3906	11.3441	7.59779	28.2634	26.8117	27.0783	27.372	23.8617	27.6142	17.1954	4.10395	9.77748	3.28946	27.3844	4.77528	26.2826	4.71604	-0.814488	-0.059247
Psmd6	-0.319344	0.0579622	3.95917e-05	792.883	723.7	753.022	659.344	619.149	648.057	80.8655	81.3899	79.938	84.7052	88.3171	83.4873	756.535	9.56326	642.183	9.32684	80.7312	6.33505	85.5032	6.41791	-0.236421	0.0828529
Spire1	-0.629335	0.0608106	4.13396e-05	27.2636	28.9828	30.5942	21.8748	17.3147	17.2677	68.2679	63.9838	68.0589	70.4644	63.9747	66.9588	28.9469	4.85534	18.8191	4.23412	66.7702	6.06113	67.1326	6.06894	-0.621212	0.0078094
Kit	-0.308677	0.0677735	4.56694e-05	988.342	868.034	873.811	862.416	698.159	728.007	157.741	133.247	144.962	159.169	135.354	156.526	910.063	9.82982	762.861	9.57528	145.317	7.18306	150.35	7.23218	-0.254546	0.0491207
Nckap1	-0.635406	0.0696741	4.67298e-05	54.5273	55.502	51.0866	40.6508	37.2166	29.3551	19.5252	18.0336	16.2366	18.1016	18.0136	18.9775	53.7053	5.74699	35.7408	5.1595	17.9318	4.16445	18.3642	4.19883	-0.587492	0.0343778
Ndufa5	0.503367	0.0707892	4.73823e-05	96.3316	96.6576	94.2359	115.208	133.94	134.515	25.011	28.1144	25.8852	24.2279	26.3109	23.9446	95.7417	6.58108	127.888	6.99873	26.3369	4.71901	24.8278	4.63388	0.417657	-0.085128
Pbk	-0.403444	0.0718641	4.79413e-05	119.541	131.727	139.406	86.7702	97.3204	101.879	33.3913	38.6454	36.9603	30.4698	36.3019	39.1143	130.224	7.02486	95.3234	6.57476	36.3323	5.18318	35.2953	5.14141	-0.450098	-0.0417763
Hnrnpl	-0.301736	0.0733642	4.88896e-05	1227.7	1130.91	1068.92	1067.13	1015.2	926.24	127.299	121.42	126.262	142.64	129.346	133.48	1142.51	10.158	1002.85	9.9699	124.993	6.96571	135.155	7.07847	-0.188095	0.112762
Ptk2	-0.522025	0.0735609	4.89427e-05	63.3356	70.4282	65.2292	48.307	47.9636	46.1048	24.4364	25.6795	26.2742	25.7999	24.9375	27.6756	66.331	6.05161	47.4585	5.56859	25.4634	4.67035	26.1377	4.70806	-0.483017	0.0377084
Adrbk1	-0.532518	0.0793012	5.2344e-05	73.9614	70.2833	75.1867	47.5778	51.546	44.7234	56.6568	51.4544	56.4131	54.952	50.4931	50.2229	73.1438	6.19266	47.949	5.58343	54.8415	5.77719	51.8893	5.69737	-0.609233	-0.0798287
Fem1b	-0.566456	0.0808915	5.32531e-05	80.6724	72.457	68.1154	61.0673	48.9587	47.4862	36.6112	35.9581	36.7788	39.4166	36.3362	39.2525	73.7483	6.20454	52.5041	5.71436	36.4493	5.18782	38.3351	5.26059	-0.49018	0.0727733
Tmem128	0.518284	0.0855093	5.60349e-05	97.0306	87.6729	98.421	139.452	122.795	123.809	21.2599	19.6637	18.3116	20.2285	18.9978	17.2963	94.3748	6.56033	128.685	7.00771	19.745	4.30342	18.8409	4.23579	0.447375	-0.0676264
Mzt1	0.64034	0.0909376	5.87832e-05	88.6418	57.9656	69.8472	123.593	97.1214	101.879	110.159	88.9198	88.9641	97.767	89.7018	87.5945	72.1515	6.17296	107.531	6.74861	96.0143	6.58518	91.6878	6.51866	0.575654	-0.0665189
Map2k4	-0.375653	0.0927652	5.98872e-05	136.458	137.523	135.798	102.083	115.829	99.8073	52.6889	55.1921	54.1307	55.8305	53.7776	53.0864	136.593	7.09374	105.906	6.72665	54.0039	5.75499	54.2315	5.76106	-0.367095	0.0060688
Tmem167b	0.636158	0.0946237	6.07731e-05	16.498	12.3177	13.2767	18.4113	22.6882	21.2393	19.5794	20.2844	20.1012	18.379	18.8719	19.6301	14.0308	3.81053	20.7796	4.3771	19.9884	4.32109	18.9603	4.24491	0.56657	-0.0761748
Coa5	0.776364	0.0983918	6.283e-05	32.996	20.7227	30.017	53.4111	38.8087	37.8163	124.795	121.884	115.602	112.147	104.248	112.268	27.9119	4.80281	43.3454	5.43781	120.76	6.916	109.554	6.7755	0.634998	-0.140496
Ddx23	-0.341118	0.0992756	6.32935e-05	326.465	292.291	304.788	271.43	246.187	223.789	94.8617	91.88	88.601	95.1084	91.2125	93.0068	307.848	8.26607	247.136	7.94916	91.7809	6.52012	93.1092	6.54085	-0.316915	0.0207307
Mplkip	0.98893	0.0993075	6.32935e-05	19.2943	16.2304	15.73	23.88	26.6686	41.7878	29.6077	33.3526	31.0985	23.7424	29.5153	31.5371	17.0849	4.09465	30.7788	4.94387	31.3529	4.97053	28.2649	4.82094	0.849217	-0.149587
Pip4k2b	-0.54422	0.112815	7.1087e-05	54.9467	51.8792	50.365	39.9216	37.0176	31.2545	42.8883	41.5919	42.2774	44.6413	39.4262	42.8223	52.397	5.71141	36.0646	5.17251	42.2525	5.40097	42.2966	5.40247	-0.538901	0.00150422
Tcf12	-0.590679	0.123461	7.71769e-05	82.49	79.123	83.9898	59.2444	62.094	52.1485	48.1789	48.0646	46.998	47.5311	48.5818	56.0958	81.8676	6.35522	57.8289	5.85372	47.7471	5.57734	50.7362	5.66494	-0.501501	0.0876021
Tcea1	-0.612889	0.127574	7.94851e-05	30.4794	34.6344	29.2954	19.8697	22.4892	21.412	39.766	39.5593	36.8047	39.0467	39.4606	41.4635	31.4697	4.97589	21.2569	4.40986	38.71	5.27463	39.9902	5.32158	-0.566032	0.0469411
Lamtor1	0.983424	0.139417	8.59008e-05	49.3542	37.9674	63.3531	75.8328	76.8214	98.4259	31.6567	37.4518	29.3867	23.6268	29.7785	30.6696	50.2249	5.65033	83.6934	6.38704	32.8317	5.03702	28.025	4.80864	0.73671	-0.228376
Hk1	0.292603	0.140139	8.62791e-05	605.253	634.288	635.263	654.422	732.789	764.959	437.079	458.813	457.115	409.424	422.736	434.871	624.935	9.28756	717.39	9.48661	451.002	8.81699	422.344	8.72227	0.199053	-0.0947175
Usp10	-0.356365	0.141987	8.72692e-05	169.035	182.881	163.073	138.541	145.284	132.789	65.1889	66.9917	64.687	69.3085	66.9731	67.4808	171.663	7.42344	138.871	7.1176	65.6226	6.03612	67.9208	6.08578	-0.305832	0.0496614
Klf3	-0.523286	0.153561	9.34637e-05	79.5539	67.8197	79.6604	58.3329	47.7646	60.0916	18.1376	12.8363	16.1329	18.379	14.6032	16.352	75.678	6.2418	55.3964	5.79172	15.7022	3.9729	16.4447	4.03955	-0.450082	0.0666537
Bag5	-0.465278	0.157325	9.52905e-05	77.5965	75.79	68.6927	60.5204	59.9048	53.8752	17.9749	17.904	16.911	18.4484	20.0507	18.4094	74.0264	6.20997	58.1001	5.86047	17.5966	4.13723	18.9695	4.24561	-0.349498	0.108382
Rps25	0.649781	0.157926	9.55966e-05	49.6338	51.4444	53.3956	70.5464	87.1704	80.8129	422.714	438.195	463.418	448.286	450.81	401.277	51.4913	5.68626	79.5099	6.31306	441.442	8.78608	433.457	8.75975	0.626806	-0.0263348
Mia3	-0.467195	0.163115	9.82621e-05	89.4807	94.1941	89.7623	77.1088	72.642	77.3593	17.6931	17.8631	19.764	20.7371	20.5886	21.9485	91.1457	6.5101	75.7034	6.24229	18.4401	4.20477	21.0914	4.39858	-0.267816	0.193812
Cinp	0.596769	0.168044	0.000100867	100.246	90.5712	114.295	127.603	139.512	167.497	27.2334	28.4418	30.0092	27.0021	26.906	26.7697	101.704	6.66824	144.871	7.17862	28.5615	4.836	26.8926	4.74914	0.510386	-0.0868618
Lama5	-0.888189	0.178974	0.000106659	78.8549	71.4426	70.2801	68.5412	37.2166	36.9529	19.9589	16.7172	15.251	20.4828	18.9063	20.82	73.5258	6.20018	47.5702	5.57199	17.309	4.11345	20.0697	4.32695	-0.628193	0.213492
Lsm3	0.667355	0.182359	0.000108289	141.771	141.871	149.796	211.639	168.768	231.56	27.266	26.6957	25.0811	22.9795	24.8574	22.4322	144.479	7.17472	203.989	7.67235	26.3476	4.7196	23.423	4.54986	0.497629	-0.169744
A430005L14Rik	0.57569	0.19201	0.00011328	33.6951	28.9828	30.3056	40.2862	38.2117	46.2775	13.9745	14.9712	14.1098	13.0618	13.6075	12.3139	30.9945	4.95394	41.5918	5.37823	14.3518	3.84316	12.9944	3.69982	0.424287	-0.143342
Igf2r	-0.727768	0.195507	0.000115072	308.149	273.018	269.142	272.342	166.181	184.074	14.2021	13.1228	15.5104	17.6623	15.9078	17.5419	283.436	8.14688	207.532	7.69719	14.2784	3.83577	17.0374	4.09063	-0.44969	0.254865
Rock1	-0.557268	0.196888	0.000115749	87.9427	94.6288	94.3802	63.2548	79.2096	65.4446	32.3939	32.8479	36.0525	34.7236	35.7754	41.0566	92.3173	6.52853	69.303	6.11485	33.7648	5.07745	37.1852	5.21666	-0.413683	0.13921
Rabif	0.517128	0.206468	0.000120954	26.4248	24.2006	32.326	37.1872	36.0225	36.7802	15.7525	15.9329	16.9628	15.1193	14.7405	15.3463	27.6504	4.78923	36.6633	5.19627	16.2161	4.01935	15.0687	3.91348	0.407034	-0.105867
Col5a1	0.398339	0.207202	0.000121313	56.6245	63.3274	74.0322	63.8016	68.6616	76.6686	129.977	138.253	139.075	105.604	112.179	116.621	64.6614	6.01483	69.7106	6.12331	135.768	7.085	111.468	6.80049	0.108475	-0.284514
Hyou1	-0.602259	0.225915	0.000131193	513.675	514.879	539.006	457.731	394.854	411.144	49.2847	54.0462	58.3843	59.83	65.1534	73.108	522.52	9.02934	421.243	8.71851	53.9051	5.75235	66.0305	6.04506	-0.310834	0.292711
N4bp1	-0.600327	0.241162	0.000139079	21.3915	22.7515	23.6672	14.4009	16.5186	13.1235	14.625	16.6217	16.1329	14.8188	15.4157	16.2829	22.6034	4.49847	14.681	3.87588	15.7932	3.98123	15.5058	3.95474	-0.62259	-0.0264938
Atg9b	0.666721	0.253091	0.000145121	11.7443	9.85415	16.5959	14.9478	18.5088	20.5486	17.0534	19.043	19.9456	15.9285	16.5602	17.6724	12.7315	3.67033	18.0017	4.17006	18.6807	4.22348	16.7204	4.06353	0.499736	-0.159942
Aak1	-0.846414	0.254892	0.000145903	11.6045	9.99906	10.1019	7.10932	5.77156	5.35299	10.2559	9.82845	10.6601	10.3107	9.61336	11.7381	10.5685	3.4017	6.07796	2.60359	10.2482	3.35729	10.5541	3.39973	-0.79811	0.042435
Ubr5	-0.602475	0.256024	0.000146383	337.929	299.247	259.762	279.998	232.056	211.529	81.516	67.8647	75.6584	97.9057	84.6663	92.0472	298.98	8.2239	241.195	7.91405	75.013	6.22907	91.5397	6.51633	-0.309849	0.287256
Podxl	-0.534681	0.258752	0.000147858	1447.77	1302.49	1229.4	1153.17	933.002	830.577	392.261	348.088	338.712	409.979	352.387	375.989	1326.55	10.3735	972.249	9.92518	359.687	8.4906	379.451	8.56777	-0.448282	0.0771729
Enah	-0.575668	0.260911	0.000149007	43.3422	44.9233	41.5619	33.906	34.0323	24.3475	42.5414	35.1464	34.1851	42.7456	38.6137	36.0819	43.2758	5.43549	30.7619	4.94307	37.291	5.22075	39.1471	5.29083	-0.492416	0.0700781
Scaf11	-0.336775	0.270799	0.000154038	220.067	207.082	193.523	199.608	195.238	179.411	84.9202	74.5352	74.0244	94.7385	86.1083	91.3256	206.89	7.69272	191.419	7.58059	77.8266	6.28219	90.7241	6.50341	-0.112132	0.221223
Sft2d2	0.69146	0.276434	0.000157154	17.3369	16.2304	16.163	25.8852	20.3	26.5923	16.674	18.1905	17.741	14.1484	15.4844	18.2252	16.5767	4.05109	24.2592	4.60046	17.5351	4.13218	15.9526	3.99572	0.549369	-0.136453
Flna	-0.935687	0.278358	0.000158068	221.884	289.973	300.891	266.691	168.768	186.837	19.3084	15.169	19.6344	26.8634	22.9576	28.1285	270.916	8.0817	207.432	7.69649	18.0372	4.17291	25.9832	4.69951	-0.385208	0.526599
Iffo1	0.53013	0.279222	0.000158379	65.0133	60.2842	60.6112	79.114	81.3989	82.367	27.8189	27.2141	23.9659	22.1704	25.4067	23.8755	61.9696	5.95349	80.9599	6.33914	26.3329	4.7188	23.8175	4.57395	0.385649	-0.144844
Romo1	0.799427	0.27995	0.000158612	25.7257	19.4185	28.4295	40.1039	42.5901	46.6228	44.1784	49.3128	54.2603	51.808	52.3928	44.5036	24.5246	4.61616	43.1056	5.4298	49.2505	5.62207	49.5681	5.63134	0.813648	0.00927367
Wdr3	-0.325026	0.312499	0.000174678	286.338	302.146	284.151	277.628	272.855	266.786	48.7968	46.5777	47.9058	56.8015	55.5057	55.5968	290.878	8.18427	272.423	8.08971	47.7601	5.57773	55.968	5.80653	-0.0945657	0.228797
Smek1	-0.611546	0.32006	0.000178406	190.286	219.4	177.793	146.561	154.041	134.515	58.6625	53.5415	58.5918	65.3321	61.6629	66.0989	195.826	7.61343	145.039	7.1803	56.9319	5.83117	64.3646	6.0082	-0.433131	0.17703
Dicer1	-0.454807	0.320733	0.000178681	109.194	103.034	96.8336	85.4942	72.244	67.6894	43.8966	36.6879	36.9863	44.2021	36.0043	37.0262	103.021	6.68679	75.1425	6.23156	39.1902	5.29242	39.0775	5.28827	-0.455231	-0.00415519
Rpn1	-0.570674	0.330368	0.000183538	348.136	326.636	363.234	278.54	252.555	246.756	41.8367	42.2194	45.8308	46.6526	48.433	49.3401	346.002	8.43464	259.284	8.01839	43.2956	5.43615	48.1419	5.58922	-0.41625	0.153072
Elp2	-0.328978	0.331555	0.000183891	332.337	312.434	311.859	292.394	267.88	295.968	37.5869	35.0373	40.2803	41.4048	42.2874	42.4538	318.877	8.31686	285.414	8.15691	37.6348	5.234	42.0486	5.39399	-0.159943	0.159991
Papola	-0.607345	0.332479	0.000184199	113.808	123.177	127.572	82.0307	91.7478	75.1145	143.409	137.742	149.112	152.95	141.854	152.266	121.519	6.92504	82.9643	6.37442	143.421	7.16411	149.023	7.21939	-0.550619	0.0552828
Fam126a	-0.353755	0.356512	0.000195671	131.285	130.857	119.202	106.275	102.495	109.305	65.5142	60.9623	61.6005	67.8289	63.9975	68.6554	127.115	6.98999	106.025	6.72826	62.6923	5.97022	66.8273	6.06237	-0.261728	0.0921479
Ctps	-0.344405	0.364728	0.000199902	160.925	169.404	155.424	136.171	142.1	126.4	51.8866	51.4408	51.7963	52.802	55.0594	55.6582	161.918	7.33912	134.89	7.07564	51.7079	5.69231	54.5066	5.76836	-0.26348	0.0760449
Atp2b1	-0.55877	0.383623	0.000209059	96.751	88.8322	86.4431	88.9577	75.8263	64.0632	21.1623	20.0798	22.1762	28.3198	24.3996	25.503	90.6754	6.50264	76.2824	6.25328	21.1394	4.40186	26.0742	4.70455	-0.249361	0.302685
Clca3a1	-0.456637	0.398729	0.000215892	69.9068	72.1671	90.4838	57.4215	53.9342	62.3364	13.8877	14.3914	17.4556	13.9634	15.2898	17.5803	77.5192	6.27648	57.8974	5.85543	15.2449	3.93026	15.6112	3.96451	-0.421057	0.0342502
Tubgcp3	-0.486103	0.398521	0.000215892	86.5446	90.2814	76.7741	64.3485	61.696	56.6381	38.1832	34.3211	33.3291	37.0585	34.0016	35.437	84.5334	6.40145	60.8942	5.92823	35.2778	5.14069	35.499	5.14971	-0.473217	0.00901856
Foxk2	-0.595928	0.412354	0.000222145	26.7044	23.7659	27.8523	17.6822	20.499	16.4043	51.3771	55.8878	57.6062	56.5472	56.4098	59.7731	26.1075	4.70639	18.1952	4.18548	54.957	5.78023	57.5767	5.84741	-0.520911	0.0671813
Pitpnm2	-0.800115	0.424996	0.000228002	10.9055	9.85415	12.8438	7.10932	5.97058	5.35299	35.9932	32.4728	31.9026	36.0644	30.3164	29.7253	11.2011	3.48557	6.1443	2.61925	33.4562	5.0642	32.0354	5.0016	-0.866325	-0.0626062
Krit1	-0.538907	0.426421	0.000228644	51.5912	47.2419	46.3243	39.9216	37.6146	33.154	15.5682	15.3258	16.7553	16.3908	17.4872	18.3864	48.3858	5.59651	36.8967	5.20542	15.8831	3.98942	17.4215	4.12279	-0.39109	0.133373
Itpa	0.821386	0.449934	0.000238692	13.2823	12.1728	14.5755	17.8645	19.1058	29.3551	29.5535	31.6065	28.2973	25.1295	29.0003	30.2243	13.3435	3.73807	22.1085	4.46653	29.8191	4.89817	28.1181	4.81343	0.728458	-0.0847408
Lin54	-0.503301	0.451656	0.000239351	28.3822	30.7218	33.6248	19.5051	24.4794	25.0382	14.3106	14.7052	15.7438	15.3505	15.1182	16.9047	30.9096	4.94998	23.0075	4.52403	14.9198	3.89916	15.7911	3.98104	-0.425947	0.0818831
Pkp4	-0.63244	0.465131	0.000245987	26.0053	25.5049	20.6367	14.7655	20.897	13.2961	24.4906	24.4381	24.4846	25.3376	25.773	25.2036	24.0489	4.5879	16.3196	4.02853	24.4711	4.61301	25.438	4.66892	-0.559372	0.0559092
Atp13a1	-0.363062	0.466535	0.000246453	125.692	127.959	127.861	110.468	99.9076	100.325	37.24	32.6092	33.8738	37.4053	34.4822	36.5425	127.171	6.99062	103.567	6.69442	34.5743	5.11163	36.1433	5.17566	-0.296202	0.0640291
Arl2bp	0.611312	0.467687	0.000246931	32.5766	29.4175	37.3769	49.2184	42.1921	42.8239	55.0414	49.9198	43.0815	46.3289	42.8138	41.5479	33.1237	5.04979	44.7448	5.48365	49.3476	5.62491	43.5636	5.44505	0.433858	-0.179857
Isca1	1.30806	0.479791	0.000252389	1.81758	1.15931	2.88625	4.92184	3.98038	4.66228	38.1832	39.191	40.2025	41.4048	36.4163	32.7885	1.95438	0.96671	4.5215	2.1768	39.1922	5.2925	36.8699	5.20437	1.21009	-0.0881257
Mpp6	-0.505117	0.492599	0.00025804	61.518	56.2266	54.8387	42.1091	46.5705	34.8808	28.0899	25.9523	26.0668	30.1462	26.2079	24.8428	57.5278	5.84619	41.1868	5.36411	26.703	4.73893	27.0656	4.75839	-0.482077	0.0194597
Pds5a	-0.59145	0.505513	0.000263562	312.623	309.971	278.811	248.644	236.833	190.117	58.4239	50.7246	52.3929	65.1472	54.945	61.439	300.468	8.23107	225.198	7.81505	53.8471	5.7508	60.5104	5.91911	-0.416019	0.168313
Gsr	-0.342606	0.509355	0.000265151	179.101	157.232	140.993	137.265	132.547	114.485	46.1841	41.9534	40.2803	47.716	41.2802	41.9241	159.109	7.31387	128.099	7.00111	42.8059	5.41974	43.6401	5.44758	-0.312755	0.0278453
Ppm1a	-0.547629	0.526612	0.000272317	51.3116	47.097	48.056	33.5414	36.6195	29.7005	54.7054	44.211	41.0584	50.8601	45.446	42.4231	48.8215	5.60945	33.2871	5.05689	46.6582	5.54406	46.2431	5.53117	-0.552553	-0.0128944
Mon2	-0.509812	0.537908	0.000277702	70.466	70.1383	74.4651	59.609	58.1136	50.5944	18.5278	19.4864	19.764	21.7543	19.9592	22.6241	71.6898	6.1637	56.1056	5.81007	19.2594	4.26749	21.4458	4.42263	-0.353623	0.155134
Nr1h2	0.763686	0.540522	0.000278907	7.54993	6.95587	7.35993	9.84368	8.55783	10.8787	20.6202	23.456	24.3549	17.1306	17.9793	19.0697	7.28858	2.86564	9.76005	3.28689	22.8104	4.51162	18.0599	4.17471	0.421252	-0.336903
Atp6v0e	0.57498	0.560156	0.000286378	155.892	139.697	141.137	196.144	170.36	197.715	67.8125	61.1328	64.9464	63.4596	55.8147	49.4552	145.576	7.18562	188.073	7.55515	64.6306	6.01415	56.2432	5.81361	0.369528	-0.200539
Nedd8	0.690372	0.562289	0.000287322	225.659	241.282	264.524	292.576	324.6	393.013	88.0316	118.378	90.6501	63.9219	92.3112	100.047	243.822	7.92968	336.73	8.39545	99.0199	6.62965	85.4266	6.41661	0.465765	-0.213033
Nek7	-0.511276	0.609184	0.000308448	59.1411	61.2986	60.4669	47.3955	45.5754	40.4064	37.1099	33.6868	37.7903	41.4279	35.5923	36.8266	60.3022	5.91414	44.4591	5.47441	36.1957	5.17775	37.9489	5.24599	-0.439732	0.0682417
Wdr61	-0.317283	0.640206	0.000322522	276.411	282.582	303.777	237.342	243.002	223.789	57.2639	60.403	59.9665	60.9859	61.0449	58.6139	287.59	8.16787	234.711	7.87474	59.2111	5.8878	60.2149	5.91205	-0.293128	0.0242512
Nrgn	0.845449	0.664418	0.000333208	18.036	8.83975	14.2869	25.7029	15.1255	21.0666	16.5114	13.5525	12.9167	13.3161	11.9824	10.7555	13.7209	3.7783	20.6317	4.36679	14.3268	3.84065	12.018	3.58712	0.588488	-0.253525
Kat2a	-0.446052	0.674539	0.000337101	89.3409	82.0213	87.3089	65.4422	63.4871	61.3004	44.1784	46.3731	46.8423	46.6757	44.2558	46.6992	86.2237	6.43001	63.4099	5.98664	45.798	5.51721	45.8769	5.5197	-0.443376	0.00248463
Prdm4	-0.778269	0.694008	0.000345449	10.2064	11.1584	11.4007	5.651	6.56763	6.73441	17.7473	18.5179	17.326	17.3618	17.4643	18.6167	10.9218	3.44914	6.31768	2.65939	17.8637	4.15896	17.8143	4.15496	-0.789745	-0.00399774
Rpl3	-0.699703	0.717255	0.000356134	24.0479	31.1565	32.1816	16.953	24.8774	19.1672	209.433	237.417	259.941	254.231	278.753	263.198	29.1287	4.86437	20.3325	4.34572	235.597	7.88018	265.394	8.05199	-0.518652	0.171815
Hax1	0.97121	0.732448	0.000362778	11.4647	12.6075	9.66892	16.2238	19.3049	30.2185	27.8514	28.6601	29.1792	29.8225	28.9202	26.1555	11.247	3.49147	21.9157	4.45389	28.5635	4.8361	28.2994	4.8227	0.96242	-0.0134028
Metap2	-0.288289	0.735947	0.00036397	461.245	482.853	422.113	392.471	417.741	385.933	265.895	247.539	243.731	272.518	268.797	267.943	455.404	8.831	398.715	8.63921	252.388	7.9795	269.752	8.07549	-0.191788	0.0959912
Bmi1	-0.67179	0.751314	0.00037047	18.036	18.9837	18.9049	13.8541	12.5382	8.63385	48.8944	37.0766	36.9344	47.0918	37.8469	36.3429	18.6415	4.22045	11.6754	3.5454	40.9685	5.35644	40.4272	5.33725	-0.675051	-0.0191876
Stxbp5	-0.476504	0.760554	0.000374473	51.032	51.0097	46.9015	41.3799	37.0176	32.8086	27.9923	24.5063	26.4558	29.3602	25.5212	26.7313	49.6477	5.63366	37.0687	5.21213	26.3182	4.71799	27.2042	4.76576	-0.421526	0.0477721
Polr3k	0.615433	0.763443	0.000375525	69.0679	54.3427	75.6196	86.7702	86.5733	107.75	42.1619	47.744	45.6492	37.9139	42.5162	44.8951	66.3434	6.05188	93.698	6.54995	45.1851	5.49777	41.7751	5.38457	0.498065	-0.113204
Ccz1	-0.456046	0.778336	0.000382099	106.678	108.83	102.317	76.9265	86.5733	68.7255	47.1923	47.3757	44.8452	47.8085	45.8466	45.5937	105.942	6.72713	77.4085	6.27442	46.4711	5.53826	46.4163	5.53656	-0.45271	-0.00170276
Fam120a	-0.577247	0.786499	0.00038535	204.547	212.589	218.777	158.775	153.643	125.364	177.191	164.185	173.182	181.732	165.819	179.688	211.971	7.72772	145.927	7.1891	171.519	7.42223	175.746	7.45735	-0.53862	0.0351258
Thoc5	-0.345932	0.79142	0.000386624	137.996	139.552	135.942	124.869	116.426	115.348	25.759	26.8799	27.9342	28.2042	29.8472	29.8865	137.83	7.10675	118.881	6.89338	26.8577	4.74726	29.3127	4.87345	-0.213371	0.126188
Eea1	-0.544366	0.792006	0.000386722	53.4088	47.8216	42.8608	42.4737	39.2068	33.672	16.5005	13.3069	13.3835	16.8301	16.0566	16.9508	48.0304	5.58588	38.4508	5.26494	14.397	3.8477	16.6125	4.0542	-0.320933	0.206501
Rpl41	0.881006	0.805011	0.000392306	25.7257	21.0125	23.09	31.9008	52.5411	58.3648	251.324	308.645	342.162	321.736	356.026	296.593	23.2761	4.54078	47.6022	5.57296	300.71	8.23223	324.785	8.34334	1.03218	0.111113
Acad9	-0.427549	0.829623	0.000401949	119.68	127.959	129.592	103.723	101.898	106.369	20.6961	19.5819	19.4009	22.7715	21.3325	22.5166	125.744	6.97435	103.997	6.70039	19.893	4.31419	22.2069	4.47293	-0.273951	0.158747
Memo1	-0.328228	0.88918	0.000425242	173.648	174.766	182.699	149.66	146.279	130.544	47.4417	47.2666	44.119	46.6295	47.3229	45.8317	177.038	7.46792	142.161	7.15138	46.2757	5.53218	46.5947	5.54209	-0.316532	0.00990964
Notch2	-0.563625	0.891178	0.000425993	455.373	427.206	450.254	385.18	282.209	294.932	37.4134	33.8301	37.2716	40.087	35.3863	39.5826	444.278	8.79532	320.774	8.32541	36.1717	5.17679	38.352	5.26123	-0.469906	0.0844403
Sbds	-0.338744	0.924065	0.000438986	126.951	137.958	150.229	112.655	117.62	120.011	37.1424	38.9182	42.4071	41.2892	43.3288	41.7245	138.379	7.11248	116.762	6.86743	39.4892	5.30339	42.1141	5.39623	-0.245056	0.0928455
Tmcc2	0.323971	0.929369	0.000440877	116.045	153.029	162.207	124.322	189.466	192.88	57.1555	86.3553	83.1542	54.8365	77.8225	78.6048	143.76	7.16752	168.89	7.39994	75.555	6.23946	70.4212	6.13794	0.232413	-0.101517
Rplp1	0.660388	0.945541	0.000446829	84.028	70.2833	95.2461	99.8951	131.353	140.904	750.86	817.712	839.92	743.598	826.097	685.349	83.1858	6.37827	124.051	6.95479	802.831	9.64895	751.681	9.55398	0.576522	-0.0949748
Tceb2	0.741408	0.945938	0.000446829	76.6178	78.2535	109.389	107.551	113.441	147.466	75.911	87.658	69.0704	58.5816	70.0746	67.0739	88.0867	6.46085	122.819	6.9404	77.5465	6.27699	65.2434	6.02776	0.479543	-0.24923
Ypel3	0.510543	0.947526	0.000447368	24.1877	28.2582	30.017	28.4373	32.0421	40.9245	11.7086	13.9549	13.0723	10.1489	11.9366	11.7458	27.4876	4.78071	33.8013	5.07901	12.9119	3.69063	11.2771	3.49532	0.298295	-0.195309
Pabpc1	-0.984901	0.959527	0.000452607	1615.13	1471.89	1026.2	1053.82	740.351	472.099	909.924	801.138	942.475	1019.38	919.221	922.483	1371.07	10.4211	755.424	9.56114	884.512	9.78874	953.693	9.89738	-0.859948	0.108643
Chd1	-0.581606	0.962858	0.000453536	176.165	177.375	151.961	146.379	134.736	108.441	46.0648	39.6685	44.0671	54.2816	46.1899	48.6031	168.5	7.39661	129.852	7.02073	43.2668	5.43519	49.6915	5.63493	-0.375881	0.19974
Sugt1	-0.355403	0.966327	0.000454528	131.984	148.972	135.365	118.853	125.382	116.73	20.4034	20.032	21.45	21.9854	23.7587	22.5243	138.773	7.11659	120.322	6.91075	20.6285	4.36656	22.7562	4.50819	-0.205835	0.141621
Nek9	-0.488096	0.98431	0.000462118	64.5939	67.5299	67.8268	56.3277	44.9783	44.0327	31.9277	29.9764	30.7354	32.065	29.6412	32.5198	66.6502	6.05854	48.4462	5.59831	30.8799	4.94859	31.4087	4.97309	-0.460224	0.0244958
2310045N01Rik	0.640124	1	0.000471808	23.9081	24.0557	32.4703	28.0727	38.0127	46.1048	15.1453	17.829	16.5997	12.8537	15.9536	15.7916	26.8114	4.74477	37.3967	5.22484	16.5247	4.04655	14.8663	3.89397	0.480067	-0.152576
Smox	0.56808	1	0.000484577	17.8961	22.6066	27.4193	23.1509	36.2215	27.9737	20.7612	28.4554	24.6402	17.3849	23.507	23.0847	22.6407	4.50085	29.1154	4.86371	24.6189	4.6217	21.3255	4.41451	0.362863	-0.207186
Rbm19	-0.445618	1	0.000495446	86.1252	77.8188	87.3089	59.7912	64.0842	67.3441	30.6701	32.9161	32.3695	31.1171	34.1618	34.1626	83.751	6.38803	63.7398	5.99412	31.9852	4.99933	33.1472	5.05081	-0.393911	0.0514805
Mgst3	0.318244	1	0.000503441	177.284	191.431	200.305	188.853	215.339	213.256	41.5223	50.9702	45.7271	37.151	43.0656	40.1968	189.673	7.56737	205.816	7.68521	46.0732	5.52586	40.1378	5.32689	0.117837	-0.198966
C530008M17Rik	-0.657207	1	0.00050543	21.1119	21.0125	17.3175	17.6822	10.548	11.3967	19.1458	13.9208	14.7841	18.0785	15.1067	16.4441	19.8139	4.30844	13.209	3.72344	15.9502	3.99551	16.5431	4.04816	-0.585	0.0526516
Bscl2	0.471013	1	0.000511096	39.2876	41.4454	45.8913	49.9476	46.5705	54.2206	37.3376	36.2786	36.701	32.6661	31.5868	30.8846	42.2081	5.39945	50.2462	5.65094	36.7724	5.20055	31.7125	4.98698	0.251495	-0.213573
Zfp592	-0.492031	1	0.000511618	42.5033	39.2717	43.0051	35.5466	32.6391	34.0174	28.2525	26.4911	26.1446	30.2849	29.584	33.4487	41.5934	5.37828	34.0677	5.09033	26.9627	4.75289	31.1058	4.95911	-0.287948	0.206219
Dpp9	-0.443526	1	0.00052007	64.4541	62.6028	66.095	47.7601	47.9636	44.5507	36.3293	36.3673	36.5972	35.7408	33.9672	38.2007	64.384	6.00863	46.7581	5.54715	36.4313	5.18711	35.9696	5.16871	-0.461484	-0.0184
Phgdh	-0.520907	1	0.000527082	76.3382	78.6883	66.528	57.0569	50.3519	52.6665	44.2543	44.8998	42.3552	41.451	48.2156	46.7376	73.8515	6.20655	53.3584	5.73764	43.8365	5.45406	45.468	5.50678	-0.468911	0.0527216
Polr3e	-0.482906	1	0.000527318	67.6698	75.0654	63.3531	52.4996	59.7058	46.1048	37.1207	35.9717	34.8594	38.2144	38.7167	38.4234	68.6961	6.10216	52.7701	5.72165	35.984	5.16928	38.4515	5.26497	-0.380509	0.0956861
Crip1	0.510148	1	0.000530383	96.6112	99.5559	123.676	121.223	129.362	150.92	17.0317	20.2776	19.0119	14.6801	17.5101	17.7876	106.614	6.73626	133.835	7.06431	18.7737	4.23064	16.6592	4.05825	0.328057	-0.172392
Senp6	-0.527693	1	0.000542826	122.197	114.772	95.1018	97.3431	92.1459	73.9058	51.3662	46.3799	45.6492	58.6278	51.5688	53.2323	110.69	6.79038	87.7982	6.45612	47.7985	5.57889	54.4763	5.76756	-0.334264	0.188665
Ncor1	-0.329738	1	0.000547304	134.361	124.046	126.706	120.494	105.281	102.916	92.8235	87.5421	94.0997	101.836	91.2011	100.976	128.371	7.00418	109.564	6.77562	91.4884	6.51552	98.0041	6.61477	-0.228553	0.0992536
Arfgef1	-0.552473	1	0.000564763	160.786	160.13	141.426	126.327	119.412	100.671	63.205	56.7676	60.0702	67.1354	62.2122	67.7111	154.114	7.26785	115.47	6.85137	60.0143	5.90723	65.6862	6.03752	-0.416481	0.130285
Lss	-0.284121	1	0.000593496	473.688	438.51	452.13	399.945	392.267	394.567	124.784	119.312	118.532	126.318	121.998	135.914	454.776	8.82901	395.593	8.62787	120.876	6.91739	128.077	7.00086	-0.20114	0.083477
Elavl1	-0.310059	1	0.000595202	246.072	257.802	275.492	209.816	220.911	211.184	45.9673	46.0252	52.4188	49.1494	47.8723	50.1001	259.789	8.02119	213.971	7.74127	48.1371	5.58908	49.0406	5.6159	-0.279926	0.0268264
Gemin7	0.528263	1	0.00059675	20.972	20.7227	25.9762	27.7081	30.0519	26.7649	20.4684	22.0714	21.7353	17.5236	20.2224	17.8567	22.557	4.4955	28.175	4.81634	21.425	4.42123	18.5342	4.21212	0.320841	-0.209104
Eif1	1.54356	1	0.000602004	0.978695	0.72457	1.44312	2.55207	3.98038	2.41748	184.292	217.229	194.736	166.451	205.417	203.371	1.0488	0.068734	2.98331	1.57691	198.752	7.63483	191.747	7.58306	1.50818	-0.0517685
Polr3gl	0.757261	1	0.000607292	22.51	18.8388	14.8642	25.1561	27.6637	36.0895	23.9485	26.7912	26.7152	21.708	24.6514	25.741	18.7377	4.22787	29.6364	4.8893	25.8183	4.69032	24.0335	4.58697	0.661431	-0.103349
Gdi2	-0.286107	1	0.000644788	382.25	413.439	401.333	345.44	383.709	353.643	109.291	105.992	111.789	118.99	121.174	120.268	399.007	8.64027	360.931	8.49558	109.024	6.7685	120.144	6.90862	-0.144694	0.140117
Etfdh	-0.527432	1	0.000648143	155.613	174.476	165.093	136.9	128.765	116.73	32.0036	32.0294	33.4329	35.2784	36.9199	36.151	165.061	7.36685	127.465	6.99396	32.4886	5.02186	36.1164	5.17458	-0.372895	0.15272
Kpnb1	-0.500635	1	0.00065472	1736.07	1698.39	1568.1	1538.17	1317.71	1141.91	281.495	256.358	255.973	305.623	279.383	307.049	1667.52	10.7035	1332.6	10.38	264.609	8.04772	297.352	8.21603	-0.323464	0.168309
Cd2ap	-0.693333	1	0.000662825	23.0692	22.7515	16.0187	13.4895	12.3392	11.9147	10.7763	10.4218	11.3345	10.2414	10.3458	11.2084	20.6131	4.36549	12.5811	3.65319	10.8442	3.43885	10.5985	3.40579	-0.712302	-0.0330598
Kdm5c	-0.331999	1	0.00066521	125.413	126.655	146.766	107.916	104.684	122.773	35.5487	40.6438	43.704	38.6306	40.0557	48.6415	132.944	7.05468	111.791	6.80466	39.9655	5.32068	42.4426	5.40744	-0.250017	0.0867568
Cmc2	0.652846	1	0.000669751	31.1784	27.5336	32.4703	39.1924	37.8136	51.9758	14.1696	16.765	14.6544	11.9059	14.3056	15.0085	30.3941	4.92572	42.994	5.42606	15.1963	3.92565	13.74	3.78031	0.500342	-0.145342
Atp2a2	-0.528801	1	0.000673002	608.888	550.528	486.765	512.965	434.658	349.326	122.724	104.723	109.792	145.206	121.003	116.161	548.727	9.09995	432.316	8.75594	112.413	6.81266	127.456	6.99386	-0.344002	0.181195
Trim28	-0.262145	1	0.000674079	935.912	847.312	856.061	800.802	780.155	696.925	198.19	188.937	192.479	203.741	196.559	198.773	879.761	9.78097	759.294	9.56851	193.202	7.59397	199.691	7.64162	-0.212454	0.0476583
Srp68	-0.29552	1	0.000689118	284.381	297.363	295.119	245.91	256.735	253.835	63.2375	65.1774	66.7361	68.4762	68.9988	69.0776	292.288	8.19124	252.16	7.9782	65.0503	6.02348	68.8509	6.1054	-0.21305	0.0819185
Tcf25	-0.303899	1	0.000689118	244.534	257.512	254.134	183.566	215.14	186.664	103.6	105.487	96.7712	94.0681	98.228	99.5323	252.06	7.97762	195.123	7.60824	101.953	6.67176	97.2761	6.60401	-0.369381	-0.067742
Hira	-0.476608	1	0.0006941	70.7457	71.1527	79.6604	47.2132	59.1087	50.0763	52.9165	56.3311	54.4938	51.3225	52.3814	56.8942	73.8529	6.20658	52.1328	5.70412	54.5805	5.77031	53.5327	5.74235	-0.502465	-0.0279649
D630045J12Rik	-0.54696	1	0.00070581	39.7071	42.3149	48.3446	33.906	36.4205	26.5923	17.3245	17.4948	17.7928	19.4887	18.5172	18.9468	43.4555	5.44147	32.3063	5.01374	17.5374	4.13236	18.9842	4.24673	-0.427725	0.11437
Srpr	0.420627	1	0.000708048	49.7736	46.5174	48.3446	59.4267	65.0793	64.0632	40.9043	42.0966	41.629	38.3763	40.7538	42.116	48.2119	5.59132	62.8564	5.97399	41.5433	5.37654	40.4154	5.33683	0.382671	-0.0397126
Myb	-0.270076	1	0.000714425	714.308	728.917	669.609	582.418	602.232	513.196	149.057	145.387	144.184	150.777	139.417	134.532	704.278	9.46	565.949	9.14453	146.21	7.1919	141.575	7.14542	-0.315474	-0.0464706
Atmin	-0.637757	1	0.000740429	14.6804	15.071	12.4109	8.56765	9.3539	8.46118	21.39	19.1863	20.3865	21.2225	18.6774	19.2155	14.0541	3.81292	8.79424	3.13656	20.3209	4.34489	19.7052	4.3005	-0.676361	-0.044393
Man2a1	-0.510286	1	0.000757243	125.413	118.685	120.934	97.3431	94.7331	77.8774	25.694	22.999	24.2512	27.0715	22.6944	26.8618	121.677	6.92691	89.9845	6.4916	24.3147	4.60376	25.5426	4.67483	-0.435308	0.0710742
Cep350	-0.54925	1	0.00075995	31.7377	27.6786	32.326	27.8904	22.0911	22.2753	10.4402	9.87619	11.4123	10.958	11.9023	13.3503	30.5807	4.93455	24.0856	4.5901	10.5762	3.40275	12.0702	3.59338	-0.34445	0.190623
Bbs9	0.553213	1	0.000807862	29.221	24.6354	22.2241	32.2654	33.2362	29.3551	15.5465	16.8536	13.9023	12.114	13.8135	13.1584	25.3602	4.66449	31.6189	4.98272	15.4341	3.94805	13.0286	3.70361	0.318223	-0.244441
Iqgap1	-1.32259	1	0.000831963	220.346	381.993	312.003	266.691	121.8	135.551	15.0478	12.9591	13.7207	20.0435	17.7275	19.7683	304.781	8.25163	174.681	7.44858	13.9092	3.79797	19.1798	4.26151	-0.803052	0.463546
Msl2	-0.518057	1	0.000846051	42.3635	52.3139	45.3141	31.3539	35.8235	35.2261	36.1558	35.3169	35.3522	37.1741	35.4207	39.4367	46.6638	5.54423	34.1345	5.09316	35.6083	5.15414	37.3438	5.2228	-0.451074	0.0686553
Rps18	-0.655384	1	0.000849011	228.735	297.218	271.884	161.145	204.99	142.631	346.305	374.47	429.985	409.378	411.692	333.926	265.946	8.05499	169.589	7.4059	383.586	8.58341	384.999	8.58871	-0.649094	0.00530197
Tjp1	-0.449873	1	0.000852769	109.754	105.063	91.2054	93.3327	86.7724	82.7123	18.7555	16.4785	18.3116	22.1242	19.7074	20.6588	102.007	6.67253	87.6058	6.45295	17.8485	4.15773	20.8301	4.3806	-0.219573	0.222866
Camsap1	-0.548476	1	0.000867234	19.7137	21.0125	19.7708	17.1353	15.9215	14.1595	21.1406	19.5341	19.6862	24.3204	21.0006	23.5607	20.1657	4.33383	15.7388	3.97625	20.1203	4.33058	22.9606	4.52109	-0.357578	0.190505
Add3	-0.304698	1	0.000868803	233.069	212.154	209.686	201.066	203	175.613	49.9677	44.5588	44.8971	53.5649	48.9137	49.5013	218.303	7.77019	193.226	7.59415	46.4745	5.53837	50.66	5.66277	-0.176042	0.124406
Tex261	0.498391	1	0.000918747	25.0266	21.882	25.8319	25.1561	32.8382	32.636	17.2919	18.095	17.1703	15.1424	15.3242	16.0296	24.2468	4.59973	30.2101	4.91696	17.5191	4.13086	15.4987	3.95408	0.317232	-0.176778
Papd4	-0.551319	1	0.000923886	23.0692	19.8532	15.8744	15.4947	14.7274	10.3606	28.3284	21.9145	20.9831	27.6263	22.6715	20.9966	19.5989	4.2927	13.5276	3.75783	23.742	4.56937	23.7648	4.57075	-0.534872	0.00138465
Socs7	-1.0392	1	0.000923886	6.1518	5.2169	4.76231	3.64581	2.18921	1.72677	16.7065	16.4239	17.0666	16.9225	15.1983	16.0987	5.377	2.4268	2.5206	1.33377	16.7323	4.06457	16.0732	4.00658	-1.09304	-0.0579859
R3hdm2	-0.643246	1	0.00093129	12.3036	13.7668	14.8642	9.84368	7.76175	7.25244	21.9754	20.9801	23.3693	19.9279	20.0851	22.6855	13.6449	3.77029	8.28596	3.05067	22.1083	4.46651	20.8995	4.3854	-0.719618	-0.0811167
Txnrd1	-0.289967	1	0.000951451	315.979	289.538	264.957	248.644	247.381	214.638	92.8885	86.0825	81.598	96.5649	84.8379	79.1268	290.158	8.1807	236.888	7.88806	86.8563	6.44056	86.8432	6.44034	-0.292637	-0.000218338
Usp47	-0.521043	1	0.000982351	233.768	231.717	207.088	189.035	190.66	167.497	33.6298	31.2246	33.9257	39.7402	36.382	38.9684	224.191	7.80859	182.397	7.51094	32.9267	5.04119	38.3636	5.26166	-0.297645	0.220479
Bag4	-0.456672	1	0.000985258	32.5766	31.3014	33.1918	20.9634	25.2754	23.6568	14.3214	13.4502	14.2913	13.8016	13.5846	14.0182	32.3566	5.01599	23.2985	4.54217	14.021	3.80951	13.8015	3.78675	-0.473821	-0.0227649
D17H6S56E-5	-0.271305	1	0.00099674	533.109	581.974	608.854	486.715	493.568	543.587	90.4276	104.546	102.477	93.8831	105.69	118.832	574.646	9.16653	507.957	8.98856	99.1502	6.63154	106.135	6.72976	-0.177967	0.0982132
Mospd3	0.653492	1	0.00100432	60.3995	50.7199	71.4346	60.5204	78.4136	88.756	127.874	129.284	122.423	100.518	102.76	97.567	60.8513	5.92722	75.8967	6.24596	126.527	6.9833	100.282	6.64791	0.318748	-0.335385
Uggt1	-0.537712	1	0.00100448	306.332	325.622	342.886	279.087	218.722	244.338	28.4477	27.712	29.1533	30.4236	30.2363	33.5101	324.946	8.34406	247.382	7.9506	28.4376	4.82973	31.39	4.97223	-0.39346	0.142503
Prr13	0.551254	1	0.00103669	150.439	130.712	157.878	179.921	191.855	231.56	56.4508	60.0074	55.8166	53.7268	53.8806	54.1075	146.343	7.19321	201.112	7.65185	57.4249	5.84361	53.905	5.75235	0.458642	-0.0912595
Cpd	-0.484796	1	0.00103902	857.477	815.286	829.94	719.5	599.048	591.937	124.448	114.592	119.648	129.254	120.659	132.067	834.234	9.70431	636.828	9.31476	119.563	6.90162	127.327	6.99239	-0.389548	0.0907705
Kmt2e	0.487106	1	0.00105093	47.5366	47.6767	54.1171	60.7027	62.691	72.8697	52.2661	47.1643	52.1594	52.201	42.7108	47.6665	49.7768	5.6374	65.4212	6.03169	50.5299	5.65907	47.5261	5.57065	0.394284	-0.0884187
Prpf8	-0.493168	1	0.00105799	1212.74	1120.33	985.076	1338.56	1000.07	1060.76	180.833	154.513	170.873	256.82	223.923	244.904	1106.05	10.1112	1133.13	10.1461	168.74	7.39866	241.882	7.91816	0.0348953	0.519503
Nfatc3	-0.45339	1	0.00106833	87.1039	97.2372	89.9066	63.2548	69.4577	69.4162	55.8979	55.9628	56.7244	56.7553	53.2283	60.203	91.4159	6.51437	67.3762	6.07417	56.195	5.81237	56.7289	5.82601	-0.440206	0.01364
H2afx	0.584876	1	0.00108805	173.648	147.377	198.718	203.983	233.649	246.756	101.388	93.3328	98.0421	94.0912	83.6019	80.2093	173.248	7.43669	228.129	7.83371	97.5877	6.60863	85.9675	6.42572	0.397011	-0.182908
Samsn1	-0.257074	1	0.00112935	757.37	785.723	781.163	674.292	754.084	705.731	132.73	127.361	132.461	138.27	145.654	146.523	774.752	9.59759	711.369	9.47445	130.851	7.03178	143.482	7.16473	-0.123136	0.132954
Eif3l	-0.265496	1	0.00113386	558.136	589.655	526.307	497.653	507.698	499.9	112.425	110.2	111.374	122.897	121.037	117.205	558.033	9.12421	501.75	8.97083	111.333	6.79874	120.379	6.91144	-0.15338	0.112709
Lamp2	-0.401762	1	0.00114906	118.842	110.424	99.4312	94.791	86.1753	84.6118	25.5964	22.0441	21.1128	26.401	23.0034	23.9215	109.566	6.77565	88.526	6.46803	22.9178	4.51839	24.442	4.61129	-0.307623	0.0928958
Psma3	0.776595	1	0.00117607	42.5033	31.5912	44.1596	54.6871	80.0057	87.5473	58.7817	64.5704	66.9436	69.9789	72.0316	64.5021	39.418	5.30078	74.08	6.21101	63.4319	5.98714	68.8375	6.10512	0.910229	0.117987
Akap9	-0.421654	1	0.00118457	58.1624	57.0961	57.4363	57.7861	44.1823	51.6304	12.847	10.9129	12.1645	14.7726	13.1955	14.6477	57.5649	5.84712	51.1996	5.67806	11.9748	3.58193	14.2052	3.82835	-0.169058	0.246423
Atp6v0b	0.514616	1	0.00121139	147.923	125.785	126.562	173.176	169.166	177.512	61.2427	62.5038	61.6265	60.616	57.5772	51.0904	133.423	7.05987	173.285	7.437	61.791	5.94932	56.4279	5.81834	0.377134	-0.130988
Rps5	-0.447453	1	0.00121802	2721.89	3107.39	2985.39	2053.87	2418.48	1829.86	698.247	790.941	751.864	702.979	776.714	698.346	2938.22	11.5207	2100.74	11.0367	747.017	9.545	726.013	9.50385	-0.484049	-0.0411462
Cenpe	-0.618384	1	0.0012334	176.585	170.564	142.725	162.238	121.402	142.459	22.7234	21.8463	25.0811	28.5741	28.8401	34.8996	163.291	7.3513	142.033	7.15008	23.217	4.53711	30.7713	4.94351	-0.20122	0.406406
Psmd13	-0.287797	1	0.00124096	326.185	352.431	306.086	282.55	280.02	268.34	43.1593	48.1669	46.0383	45.9128	49.1884	46.2616	328.234	8.35858	276.97	8.11359	45.7882	5.5169	47.1209	5.5583	-0.244995	0.0413926
Ncstn	-0.314192	1	0.00126782	183.575	172.158	170.721	166.249	135.93	134.17	22.615	21.7508	20.9572	23.9274	21.3325	22.0099	175.485	7.4552	145.45	7.18438	21.7743	4.44456	22.4233	4.48693	-0.270826	0.042369
Aplp2	-0.264332	1	0.00127093	662.577	595.596	599.618	599.918	502.324	478.315	117.694	106.606	105.512	114.713	109.432	111.217	619.263	9.27441	526.853	9.04126	109.937	6.78053	111.787	6.80461	-0.233154	0.024077
Cks1b	0.587367	1	0.00129596	92.976	74.1959	99.4312	120.859	120.208	127.436	95.6422	82.6586	92.8806	94.6229	83.476	72.1791	88.8677	6.47359	122.834	6.94057	90.3938	6.49815	83.426	6.38243	0.466978	-0.115726
Ppp5c	-0.304582	1	0.00132374	170.153	165.347	182.122	147.291	140.906	136.415	47.9946	47.2802	50.6292	51.3225	48.742	47.6818	172.541	7.43079	141.537	7.14504	48.6347	5.60391	49.2488	5.62202	-0.285757	0.0181034
Ube4b	-0.51723	1	0.00134477	207.623	196.938	179.38	159.322	142.697	129.853	43.7123	41.4282	46.0124	50.1434	42.6879	45.9315	194.647	7.60472	143.957	7.1695	43.7176	5.45014	46.2543	5.53151	-0.435221	0.0813727
Ndufab1	1.06088	1	0.00134747	5.31292	4.78216	8.65874	7.83849	13.7323	13.6415	21.7152	20.6595	22.0724	21.5924	19.3641	16.9355	6.25127	2.64415	11.7374	3.55305	21.4824	4.42508	19.2973	4.27033	0.908895	-0.154754
Rnf146	-0.453305	1	0.00141111	32.4368	34.4895	30.1613	26.979	26.0715	26.2469	17.151	19.1385	19.0119	18.6333	21.447	21.5417	32.3625	5.01625	26.4325	4.72424	18.4338	4.20428	20.5406	4.36041	-0.292012	0.156127
Ppip5k2	-0.415625	1	0.00145613	63.755	61.0088	61.1884	49.583	52.143	50.4217	23.1571	21.0551	23.9918	25.1526	22.7059	26.3091	61.9841	5.95383	50.7159	5.66437	22.7347	4.50682	24.7225	4.62775	-0.289459	0.120932
Timm8b	0.521753	1	0.00146653	92.5566	92.8898	115.738	117.213	138.318	146.948	36.1884	38.9796	41.4993	37.0585	36.691	34.654	100.395	6.64954	134.16	7.06781	38.8891	5.28129	36.1345	5.17531	0.418265	-0.105989
Patl1	-0.46384	1	0.00147691	54.5273	57.3859	57.5806	38.8279	47.3666	40.5791	39.1697	42.5058	39.2428	39.9021	40.1129	44.4959	56.4979	5.82013	42.2578	5.40115	40.3061	5.33293	41.5036	5.37517	-0.418979	0.0422383
Adam33	0.586537	1	0.00147958	19.4341	19.9981	20.348	21.328	26.4696	26.9376	24.0027	25.4885	20.9572	17.8935	20.3254	20.582	19.9267	4.31663	24.9117	4.63875	23.4828	4.55353	19.6003	4.2928	0.322118	-0.260727
Med1	-0.442732	1	0.00149549	114.787	116.656	112.564	100.624	100.903	87.3746	26.3119	23.7629	25.9371	28.5741	27.6728	30.0938	114.669	6.84133	96.3005	6.58947	25.3373	4.66319	28.7802	4.84701	-0.251857	0.183816
Bola3	0.571404	1	0.00150308	24.747	18.1142	21.2139	30.2602	28.6588	27.6283	35.1476	32.3295	33.1994	36.2032	29.8701	26.24	21.3584	4.41673	28.8491	4.85045	33.5589	5.06862	30.7711	4.9435	0.433724	-0.125119
Zfp639	-0.483107	1	0.00153851	26.4248	26.2294	26.4092	21.5103	20.897	19.3398	12.5976	10.947	11.1529	13.2467	12.8064	11.6537	26.3544	4.71997	20.5824	4.36334	11.5659	3.5318	12.5689	3.65179	-0.356637	0.119989
Cul1	-0.489142	1	0.0015675	137.437	132.886	129.16	111.744	121.8	96.5265	38.7036	34.8531	35.2485	45.4967	40.2388	40.166	133.161	7.05703	110.023	6.78167	36.2684	5.18064	41.9672	5.39119	-0.275359	0.210549
Atp1a1	-0.511319	1	0.00158554	638.249	607.334	661.816	563.824	504.713	429.793	107.112	110.725	109.506	121.07	119.435	125.219	635.8	9.31243	499.443	8.96418	109.115	6.7697	121.908	6.92965	-0.348252	0.159949
Acsl3	-0.476258	1	0.00159983	108.495	92.7449	76.0526	101.536	76.8214	72.697	18.0833	14.9302	16.4182	23.2569	19.2611	19.3614	92.4309	6.5303	83.6847	6.38689	16.4772	4.0424	20.6265	4.36642	-0.143412	0.324021
Ivns1abp	-0.509829	1	0.00160688	206.225	224.906	208.387	167.707	160.21	145.912	123.179	116.898	132.72	135.658	124.825	132.374	213.173	7.73588	157.943	7.30326	124.266	6.95728	130.952	7.0329	-0.432617	0.0756146
Rock2	-0.521971	1	0.00162494	41.245	44.4886	41.129	34.9998	36.0225	27.9737	28.0032	24.404	24.9255	29.9381	26.4253	29.7791	42.2875	5.40216	32.9986	5.04433	25.7776	4.68804	28.7142	4.84369	-0.357826	0.155646
Tmem14c	0.512864	1	0.00166546	336.951	344.171	385.17	438.773	465.307	532.881	172.356	176.373	183.816	179.143	169.081	153.67	355.43	8.47342	478.987	8.90384	177.515	7.4718	167.298	7.38628	0.43042	-0.085519
Ranbp9	-0.440459	1	0.00167077	69.3475	69.5587	63.6417	55.0517	65.2783	50.4217	20.5769	20.7482	20.6718	23.2338	23.3696	23.8371	67.516	6.07716	56.9172	5.83079	20.6656	4.36916	23.4802	4.55337	-0.246364	0.18421
Actn4	-0.624586	1	0.00167925	304.933	391.557	385.602	345.258	263.7	265.577	49.74	48.0714	48.3726	57.3101	57.6115	67.4654	360.698	8.49465	291.512	8.18741	48.728	5.60668	60.7957	5.9259	-0.307236	0.319217
2310033P09Rik	0.564454	1	0.00169674	39.4274	30.1421	34.3463	51.4059	46.1725	55.084	13.3565	13.2865	13.2538	12.2758	14.523	12.7668	34.6386	5.11431	50.8874	5.66924	13.2989	3.73324	13.1886	3.72121	0.554928	-0.0120253
Azi2	-0.469696	1	0.00173081	26.984	30.4319	34.202	21.328	22.6882	20.7212	33.0227	33.3663	33.9257	33.036	32.3535	32.8499	30.5393	4.9326	21.5791	4.43157	33.4382	5.06343	32.7465	5.03327	-0.501031	-0.0301589
Slc38a1	-0.298641	1	0.00173255	167.077	163.753	158.166	150.572	137.721	129.335	71.5962	65.6071	66.1395	77.3767	64.318	71.8797	162.999	7.34872	139.209	7.12111	67.7809	6.08281	71.1915	6.15363	-0.227604	0.070825
Fam32a	0.636706	1	0.00174592	49.7736	70.5731	49.0662	64.8954	74.6322	89.274	50.0002	51.7886	53.4822	44.4564	45.0111	45.6705	56.471	5.81944	76.2672	6.25299	51.757	5.69368	45.046	5.49333	0.433553	-0.200356
Specc1l	-0.482895	1	0.00176124	34.534	34.9243	27.5637	28.6196	27.2656	27.1103	17.2811	17.2288	18.3894	20.7602	20.4742	21.6645	32.3406	5.01528	27.6652	4.79	17.6331	4.14021	20.9663	4.39	-0.225276	0.249786
Cox6c	0.751898	1	0.00176287	16.0786	19.5634	28.4295	28.0727	33.8333	43.6873	142.889	154.636	165.712	154.453	159.937	136.804	21.3572	4.41665	35.1978	5.13741	154.412	7.27064	150.398	7.23264	0.720764	-0.0380031
Nsa2	-0.691774	1	0.00181903	20.972	30.7218	18.6163	14.5832	20.1009	15.7136	30.3449	32.6433	35.0669	35.9026	39.8726	37.886	23.4367	4.5507	16.7993	4.07033	32.685	5.03056	37.8871	5.24363	-0.480371	0.213075
Osbpl8	-0.389032	1	0.00188015	63.6152	61.1537	70.4244	55.4163	50.7499	52.8392	14.3106	13.1364	16.0032	15.4199	14.4544	16.1985	65.0644	6.0238	53.0018	5.72797	14.4834	3.85633	15.3576	3.94088	-0.295828	0.0845509
Tial1	-0.298685	1	0.00191537	132.543	152.305	164.372	112.838	132.547	138.487	40.3731	44.7771	46.1161	44.1096	46.8194	47.2903	149.74	7.22631	127.957	6.99952	43.7554	5.45139	46.0731	5.52585	-0.226797	0.074462
Dip2b	-0.470562	1	0.00193076	134.361	116.221	108.811	110.103	97.1214	80.9855	12.5109	10.756	11.7495	14.079	11.5933	12.905	119.798	6.90446	96.0701	6.58602	11.6721	3.545	12.8591	3.68472	-0.318442	0.13972
Nucb2	-0.412447	1	0.00193105	76.0586	123.032	119.058	68.3589	98.9125	98.944	10.8847	14.7324	15.7438	11.3511	16.7318	18.348	106.049	6.72859	88.7385	6.47149	13.787	3.78523	15.477	3.95205	-0.257105	0.166816
Scaf4	-0.477732	1	0.00197127	119.96	119.844	107.08	106.64	99.9076	77.7047	37.0123	33.1889	33.6404	40.5725	38.1673	38.861	115.628	6.85335	94.7507	6.56607	34.6139	5.11328	39.2003	5.29279	-0.28728	0.179513
Ube2w	0.458687	1	0.00204815	21.3915	19.2736	20.0594	27.7081	27.2656	26.2469	12.7277	11.3835	10.8158	11.5129	11.4788	10.909	20.2415	4.33924	27.0736	4.75881	11.6423	3.54131	11.3002	3.49828	0.41957	-0.0430283
Vamp8	0.491536	1	0.00212604	93.5353	96.2228	109.244	125.598	119.611	132.271	47.7778	49.0058	44.5339	41.1042	45.3774	40.7725	99.6675	6.63905	125.826	6.97529	47.1058	5.55783	42.418	5.40661	0.33624	-0.151228
Pink1	0.628273	1	0.00213101	10.486	11.8829	13.5654	13.8541	20.3	14.3322	19.0049	20.6118	21.8649	18.1941	18.1281	16.9662	11.9781	3.58233	16.1621	4.01454	20.4939	4.35712	17.7628	4.15078	0.432213	-0.206336
Tmcc3	-0.588482	1	0.00213542	15.5193	14.9261	18.039	11.302	10.15	10.1879	12.9229	13.9413	14.0579	11.7903	13.3786	15.0546	16.1615	4.01449	10.5466	3.39871	13.6407	3.76984	13.4078	3.745	-0.615777	-0.024839
Dot1l	-0.480059	1	0.00215933	79.2743	74.4858	75.331	59.2444	64.6812	45.2414	57.3398	51.7818	51.8741	58.6047	52.9536	53.24	76.3637	6.25481	56.389	5.81734	53.6653	5.74592	54.9328	5.7796	-0.437473	0.0336788
Ehmt1	-0.375619	1	0.00223624	105.419	99.5559	108.956	82.3953	89.1606	88.756	18.0725	18.3746	18.6228	18.8182	19.387	21.0503	104.644	6.70934	86.7706	6.43913	18.3566	4.19823	19.7518	4.30392	-0.270207	0.105684
Tango2	0.455973	1	0.00224029	19.8535	21.0125	28.8625	24.9738	32.2411	29.7005	14.6792	16.6695	17.4038	13.1312	14.8893	16.4057	23.2428	4.53871	28.9718	4.85658	16.2508	4.02244	14.8087	3.88838	0.317862	-0.134064
Eef1g	-0.574512	1	0.00226655	73.1225	76.0798	91.9269	60.885	61.895	46.2775	346.619	349.432	329.686	332.07	376.237	360.803	80.3764	6.3287	56.3525	5.81641	341.912	8.41748	356.37	8.47723	-0.512293	0.0597511
Atf5	0.793724	1	0.00227709	5.73236	6.2313	8.08149	10.5728	11.5431	8.2885	15.308	20.1275	15.6401	12.0677	16.2855	16.2752	6.68171	2.74022	10.1348	3.34125	17.0252	4.0896	14.8761	3.89493	0.60103	-0.194669
Max	0.487417	1	0.00230104	91.1585	87.528	91.3497	106.822	119.212	125.191	83.6517	86.0006	83.3099	82.5321	77.2045	75.1117	90.0121	6.49205	117.075	6.87129	84.3207	6.39782	78.2828	6.29062	0.379245	-0.107193
Erp44	-0.40285	1	0.00232431	89.0613	100.715	104.049	79.4786	86.1753	75.4599	18.9073	21.3893	21.0868	19.7661	23.0835	23.7066	97.9419	6.61385	80.3713	6.32861	20.4611	4.35482	22.1854	4.47154	-0.285246	0.116723
Eef1a1	-0.498948	1	0.00236793	1188.97	1228.44	1202.7	965.592	1092.62	739.576	2263.08	2216.47	2385.25	2495.01	2482.65	2490	1206.7	10.2369	932.594	9.86511	2288.27	11.16	2489.22	11.2815	-0.371749	0.121439
Rbms1	-0.56385	1	0.00237024	31.8775	28.9828	30.3056	22.2394	23.0862	15.3683	16.7715	11.9224	12.9945	15.3043	12.3486	12.7668	30.3886	4.92546	20.2313	4.33852	13.8961	3.79661	13.4732	3.75202	-0.586942	-0.0445862
Cry1	-0.413509	1	0.00239505	50.8921	49.7055	55.5602	38.6456	42.7891	36.9529	19.6553	19.6978	21.3721	20.922	19.7875	20.4285	52.0526	5.7019	39.4625	5.30241	20.2418	4.33926	20.3793	4.34903	-0.399487	0.00977154
Cnot4	-0.454296	1	0.0024093	51.032	55.502	49.4991	51.2236	47.9636	45.2414	21.5743	21.7917	23.3952	27.0715	26.7	30.6082	52.011	5.70075	48.1429	5.58925	22.2537	4.47598	28.1265	4.81386	-0.111496	0.337884
Scyl2	-0.440661	1	0.00241265	56.3449	63.1825	54.1171	45.7549	53.9342	48.5223	15.2429	14.7802	15.2769	17.2924	16.8806	18.1254	57.8815	5.85503	49.4038	5.62655	15.1	3.91648	17.4328	4.12373	-0.228481	0.207256
Mthfd2	-0.407542	1	0.00246158	61.2383	59.2698	53.3956	53.4111	52.7401	47.6589	26.5938	28.3804	27.1042	30.493	33.0288	32.4046	57.9679	5.85718	51.27	5.68004	27.3595	4.77397	31.9754	4.99889	-0.177139	0.224923
B3glct	-0.413683	1	0.00247439	55.3662	55.3571	52.2411	42.4737	41.197	41.2698	33.0444	32.9502	30.8132	32.6892	31.8157	34.4237	54.3215	5.76345	41.6468	5.38013	32.2693	5.01209	32.9762	5.04335	-0.383316	0.0312625
Csnk1d	-0.288943	1	0.00247661	166.099	163.753	156.867	133.983	148.667	126.054	78.4154	78.9959	80.2234	84.0348	79.9969	79.2113	162.24	7.34198	136.235	7.08995	79.2115	6.30764	81.081	6.34129	-0.252028	0.033653
Ski	-0.660559	1	0.00251759	9.92676	13.477	15.0085	8.74994	9.75194	5.69834	26.0409	24.2676	24.5105	24.5516	24.3539	25.0193	12.8041	3.67853	8.06674	3.01199	24.9397	4.64037	24.6416	4.62302	-0.666546	-0.0173475
Snx5	-0.270531	1	0.00252047	288.016	305.913	290.934	253.201	260.317	231.733	93.4414	89.3905	88.1082	89.1439	91.7619	93.7975	294.954	8.20435	248.417	7.95662	90.3134	6.49687	91.5678	6.51677	-0.247727	0.0199002
Cwc27	-0.462988	1	0.00269147	53.269	52.3139	45.8913	47.2132	42.5901	32.636	13.7902	12.8363	13.176	14.657	14.7863	14.3176	50.4914	5.65797	40.8131	5.35096	13.2675	3.72983	14.5869	3.86661	-0.307006	0.13678
Hsp90b1	-0.45808	1	0.00270744	1165.63	1271.47	1260.57	1157.73	1100.58	1353.44	92.7476	105.119	120.97	120.4	147.176	158.868	1232.56	10.2674	1203.92	10.2335	106.279	6.73171	142.148	7.15125	-0.0339198	0.419537
Chchd4	0.45859	1	0.00270883	36.6312	34.4895	38.82	46.484	48.1626	48.0042	25.8783	23.5446	23.3434	24.9677	23.4497	20.536	36.6469	5.19562	47.5503	5.57138	24.2554	4.60024	22.9845	4.52259	0.375764	-0.0776477
Aebp2	-0.449135	1	0.00271282	28.522	25.0701	23.2343	19.8697	20.499	19.3398	23.6233	21.2938	22.6949	25.9618	22.5227	23.0771	25.6088	4.67857	19.9028	4.3149	22.5373	4.49425	23.8539	4.57615	-0.363666	0.0819049
Ddit4	-0.509348	1	0.00272065	41.1052	38.5471	56.4261	35.182	49.3568	61.8184	15.4706	16.2261	20.2309	21.5924	26.8716	30.7924	45.3595	5.50333	48.7857	5.60839	17.3092	4.11347	26.4188	4.72349	0.105055	0.610027
Larp1	-0.515956	1	0.00278143	142.889	129.408	103.328	107.004	98.5145	74.9418	202.874	180.111	170.744	206.769	188.445	192.708	125.208	6.96819	93.4869	6.54669	184.576	7.52807	195.974	7.61452	-0.421495	0.0864466
Pkn2	-0.47941	1	0.00278143	159.807	143.175	120.645	123.593	105.679	88.0653	45.2734	38.7613	39.4503	47.7854	39.4033	41.3176	141.209	7.14169	105.779	6.72491	41.1617	5.36323	42.8354	5.42073	-0.416777	0.0575035
Wdr1	-0.25398	1	0.00283271	562.889	579.656	503.65	501.663	527.202	483.15	70.1326	73.0279	69.1223	73.6547	78.5778	79.741	548.732	9.09996	504.005	8.97729	70.7609	6.14488	77.3245	6.27285	-0.122663	0.127973
Pik3ca	-0.444305	1	0.00286337	44.1811	44.9233	48.7776	38.0987	32.2411	30.7365	21.3032	20.5709	24.744	21.7774	20.829	23.4609	45.9607	5.52233	33.6921	5.07434	22.206	4.47288	22.0224	4.4609	-0.447989	-0.0119779
Abca3	-0.494923	1	0.00286412	60.3995	66.3706	73.5993	51.4059	47.9636	44.5507	33.4564	30.5494	30.891	32.7817	28.7256	34.7921	66.7898	6.06156	47.9734	5.58416	31.6323	4.98332	32.0998	5.00449	-0.477393	0.0211688
Ltbp1	-0.445972	1	0.00286981	136.458	118.395	129.304	114.296	82.991	85.9932	19.3409	16.4103	19.5565	19.0725	16.6403	19.3153	128.052	7.00059	94.4268	6.56112	18.4359	4.20445	18.3427	4.19714	-0.439464	-0.00731311
Gemin6	-0.536132	1	0.00287526	15.3795	21.4473	16.163	10.3906	13.1353	12.2601	15.1453	17.1128	15.7179	14.6801	16.3084	16.0833	17.6632	4.14268	11.9286	3.57636	15.992	3.99928	15.6906	3.97183	-0.566322	-0.0274516
Kifc1	0.743818	1	0.00287526	6.99068	3.91268	5.62818	11.4843	9.3539	10.706	12.37	10.7902	10.4526	12.2527	12.7492	13.1584	5.51051	2.46219	10.5147	3.39434	11.2042	3.48597	12.7201	3.66903	0.932153	0.18306
Rps27l	0.481929	1	0.00289809	273.895	290.263	290.645	330.128	390.874	423.75	90.6227	102.752	99.1315	92.6579	99.1779	87.6406	284.934	8.15448	381.584	8.57586	97.502	6.60736	93.1588	6.54162	0.421371	-0.0657407
Adam10	-0.267268	1	0.00291006	313.043	294.755	307.097	268.514	272.855	259.879	78.3069	70.7089	79.8343	86.0923	76.5865	78.3514	304.965	8.2525	267.083	8.06114	76.2834	6.2533	80.3434	6.32811	-0.191356	0.0748107
Hpgd	-0.387761	1	0.00296885	56.2051	79.5577	87.0203	45.5726	58.1136	72.5244	10.115	15.244	17.6891	10.4494	16.1024	17.7876	74.261	6.21453	58.7369	5.87619	14.3493	3.84291	14.7798	3.88556	-0.33834	0.0426429
Mtf2	-0.447654	1	0.00297681	67.6698	82.0213	64.0747	53.2288	58.5116	56.12	44.8614	42.8537	42.9777	45.566	47.5175	47.0753	71.2552	6.15492	55.9535	5.80616	43.5643	5.44507	46.7196	5.54596	-0.348768	0.100883
Scrib	-0.570935	1	0.00299209	96.751	79.7027	92.0713	73.6453	59.9048	45.9321	43.3436	42.2466	40.3062	42.1908	39.2431	42.6457	89.5083	6.48395	59.8274	5.90273	41.9655	5.39113	41.3599	5.37016	-0.581215	-0.020972
Il1rl1	-0.243575	1	0.00299317	554.221	688.921	624.872	509.684	641.837	543.76	125.337	155.639	145.533	135.265	160.944	161.033	622.671	9.28233	565.094	9.14235	142.169	7.15147	152.414	7.25185	-0.139981	0.100382
Atg2b	-0.371053	1	0.00301326	87.3835	80.2823	94.8132	67.2652	69.8557	74.7692	30.9195	28.3122	33.3551	33.7064	29.1376	33.9246	87.493	6.4511	70.63	6.14221	30.8623	4.94777	32.2562	5.01151	-0.308886	0.0637343
Mtmr2	-0.525258	1	0.00302166	21.1119	25.0701	24.5331	19.8697	15.3245	14.5049	23.1679	19.3909	18.7006	22.8177	19.6158	19.4074	23.5717	4.55898	16.5663	4.05018	20.4198	4.3519	20.6137	4.36553	-0.5088	0.0136309
Chd2	-0.437742	1	0.00304542	37.0506	37.098	30.8828	34.6352	27.8627	28.4917	18.3869	15.5168	16.9369	21.1532	18.2196	19.9218	35.0105	5.12971	30.3299	4.92267	16.9469	4.08295	19.7649	4.30487	-0.207047	0.221919
Mrps10	-0.506549	1	0.0031276	18.036	17.5346	18.1834	13.3072	11.7421	11.0513	19.9047	20.5163	20.0494	19.35	19.6158	18.6935	17.918	4.16333	12.0336	3.58899	20.1568	4.33319	19.2198	4.26452	-0.574344	-0.0686744
Pdxp	0.715261	1	0.00316994	23.0692	16.0854	12.8438	27.1613	24.6784	16.9224	20.837	20.4208	19.4787	16.2521	16.0223	16.2522	17.3328	4.11544	22.9207	4.51858	20.2455	4.33953	16.1755	4.01574	0.403142	-0.32379
Erlec1	-0.38998	1	0.00326359	41.6644	37.5327	44.5925	34.9998	32.8382	36.2622	9.90898	9.96486	10.6083	11.3973	10.8494	11.4925	41.2632	5.36678	34.7	5.11687	10.1607	3.34493	11.2464	3.49139	-0.249919	0.14646
Prdx6	-0.258878	1	0.00330085	320.033	343.736	335.526	267.785	289.175	252.972	167.249	175.971	157.749	151.933	166.3	166.998	333.098	8.3798	269.977	8.07669	166.99	7.38362	161.744	7.33756	-0.303111	-0.0460521
Rab4a	0.388856	1	0.0033535	49.494	47.5318	56.2818	59.7912	61.0989	66.826	32.5999	34.3484	33.381	30.2618	32.1933	31.6599	51.1025	5.67532	62.5721	5.96745	33.4431	5.06364	31.3717	4.97139	0.292124	-0.0922462
Mre11a	-0.350272	1	0.00341123	85.9854	79.8476	80.0933	79.4786	75.2293	70.4522	22.3548	20.0866	21.1387	25.5456	24.125	24.2132	81.9754	6.35712	75.0534	6.22984	21.1934	4.40554	24.628	4.62222	-0.127275	0.216683
Sac3d1	0.530006	1	0.00342424	24.8868	18.8388	22.9457	25.1561	28.2607	25.7289	29.7269	29.3694	24.1733	22.4016	24.0563	21.818	22.2238	4.47403	26.3819	4.72148	27.7566	4.79476	22.7586	4.50834	0.247445	-0.286415
Ndufa7	0.539822	1	0.00348621	73.4021	70.718	88.8964	81.1192	112.247	125.536	41.956	54.5032	48.9692	41.1736	48.4559	45.8701	77.6722	6.27933	106.301	6.73201	48.4761	5.5992	45.1665	5.49718	0.452682	-0.10202
Odc1	-0.67762	1	0.00350408	25.7257	32.4607	25.6876	14.2186	25.4745	12.4327	244.591	247.485	245.313	252.382	241.593	228.798	27.958	4.80519	17.3753	4.11896	245.796	7.94132	240.924	7.91243	-0.686225	-0.0288841
Dnajc2	-0.478624	1	0.00352965	296.545	268.96	262.793	216.926	228.474	189.254	103.513	105.514	105.201	105.442	113.426	115.807	276.099	8.10904	211.551	7.72486	104.743	6.71071	111.559	6.80166	-0.38418	0.090953
Mark3	-0.445206	1	0.00357246	67.9494	64.7765	67.3938	53.2288	56.5215	41.7878	44.547	41.5782	43.3149	44.4564	43.3975	44.826	66.7066	6.05976	50.5127	5.65857	43.1467	5.43118	44.2266	5.46684	-0.401183	0.0356636
Rbmx2	0.417867	1	0.0035757	30.6192	28.8379	24.5331	39.1924	38.2117	39.543	10.6462	9.98532	9.98577	10.2414	10.7693	10.671	27.9967	4.80719	38.9824	5.28475	10.2058	3.35131	10.5606	3.40061	0.477565	0.0493017
Bsdc1	0.439336	1	0.00358109	27.5433	29.7074	37.3769	32.63	38.0127	48.3496	20.9238	27.7256	28.7123	19.951	23.5756	28.5277	31.5425	4.97923	39.6641	5.30976	25.7872	4.68859	24.0181	4.58605	0.330536	-0.102534
Bloc1s5	0.400319	1	0.00361708	56.6245	46.6623	55.9932	63.9839	57.5165	63.0271	56.1364	54.2713	53.0932	48.7795	47.815	47.1521	53.0933	5.73046	61.5092	5.94273	54.5003	5.76819	47.9155	5.58242	0.212272	-0.185771
1810037I17Rik	0.803144	1	0.00364045	10.2064	11.3033	20.2037	18.5936	20.698	23.4841	53.502	51.584	53.3525	47.0225	47.6319	42.9989	13.9045	3.79748	20.9252	4.38717	52.8128	5.72282	45.8844	5.51993	0.589695	-0.202884
Aftph	-0.413917	1	0.00368528	114.368	135.205	131.757	94.6087	109.262	101.361	32.1554	31.8521	34.1072	34.1225	34.2533	36.2661	127.11	6.98993	101.744	6.6688	32.7049	5.03144	34.8807	5.12436	-0.321133	0.0929201
Rps3a1	-0.54693	1	0.00369372	437.477	440.538	533.234	389.919	325.197	307.883	396.793	479.787	443.135	415.203	512.873	474.838	470.416	8.87779	341	8.41363	439.905	8.78105	467.638	8.86925	-0.464167	0.0882012
Crtc2	-0.586892	1	0.00370487	14.6804	15.3609	18.472	10.7551	10.15	9.49724	13.2915	14.0299	12.4239	12.5301	12.1655	12.9895	16.1711	4.01535	10.1341	3.34115	13.2484	3.72775	12.5617	3.65096	-0.674197	-0.0767905
Ndufb3	0.601999	1	0.00371414	156.731	134.77	217.479	228.592	219.12	264.023	39.8311	44.4088	45.3899	40.3413	42.0928	37.4561	169.66	7.4065	237.245	7.89023	43.2099	5.43329	39.9634	5.32061	0.483733	-0.112683
Dcaf4	0.396913	1	0.00373119	51.5912	46.8072	55.5602	58.5152	57.1185	69.2435	21.932	21.9486	23.5249	21.0145	20.2453	20.4055	51.3195	5.68144	61.6257	5.94546	22.4685	4.48983	20.5551	4.36142	0.264025	-0.12841
Kmt2a	-0.5934	1	0.00381673	13.7017	9.85415	11.8336	9.84368	8.15979	9.15188	14.3864	14.0231	15.7438	17.6392	15.6446	17.8337	11.7965	3.56029	9.05178	3.1782	14.7178	3.87949	17.0392	4.09078	-0.382084	0.211294
Tdrd3	-0.445159	1	0.0038386	47.3968	51.5894	48.056	43.932	38.2117	41.9605	10.0499	10.1968	11.0492	10.8425	11.4559	13.5115	49.0141	5.61512	41.3681	5.37045	10.432	3.38294	11.9366	3.57732	-0.244678	0.194386
Cdk16	0.659454	1	0.00393462	6.01198	10.144	7.35993	8.93223	11.5431	12.0874	36.2209	37.2949	35.015	32.6429	30.7857	32.1973	7.83863	2.9706	10.8542	3.44019	36.1769	5.177	31.8753	4.99437	0.469586	-0.182631
Rpn2	-0.435462	1	0.00393641	1104.53	1070.33	1161.86	950.28	886.431	803.294	144.211	152.931	152.38	158.869	159.822	162.084	1112.24	10.1193	880.002	9.78136	149.841	7.22729	160.258	7.32426	-0.33789	0.0969685
Orc2	-0.459393	1	0.00400304	231.811	275.481	255	190.676	210.164	195.816	87.9883	94.7924	89.846	90.7622	96.0764	107.117	254.097	7.98924	198.885	7.63579	90.8755	6.50582	97.9852	6.61449	-0.353445	0.108673
Nupl1	-0.468672	1	0.00401153	171.831	188.243	168.99	149.66	144.09	122.083	30.54	28.9738	27.9083	33.0822	29.893	31.7597	176.355	7.46234	138.611	7.1149	29.1407	4.86496	31.5783	4.98086	-0.347437	0.115898
Atp13a3	-0.500849	1	0.0040147	154.214	153.029	148.642	114.843	113.839	88.238	188.748	151.86	153.236	181.016	145.917	155.674	151.962	7.24756	105.64	6.72301	164.615	7.36295	160.869	7.32974	-0.524552	-0.0332062
Ppp2r5e	-0.414982	1	0.00402653	61.3782	67.5299	57.1477	51.5882	55.5264	47.1408	29.7811	28.1349	27.182	32.2037	30.0303	31.5755	62.0186	5.95463	51.4185	5.68421	28.366	4.82609	31.2698	4.9667	-0.270414	0.140608
Iars	-0.2496	1	0.00402778	431.884	428.366	401.621	416.716	390.675	396.639	82.5134	80.0122	86.9151	94.0219	90.5602	97.6975	420.624	8.71639	401.343	8.64869	83.1469	6.37759	94.0932	6.55602	-0.0676933	0.178428
Aldh2	-0.27702	1	0.00409273	189.028	193.75	195.976	169.53	167.574	173.713	32.9685	34.4166	39.4762	37.0354	38.4763	38.1393	192.918	7.59184	170.272	7.4117	35.6204	5.15463	37.8837	5.24351	-0.180143	0.0888714
Ect2	-0.389816	1	0.00409522	120.939	115.931	123.964	100.442	98.5145	97.7352	24.5123	22.4602	25.0811	24.3204	24.4225	28.7196	120.278	6.91023	98.8972	6.62786	24.0179	4.58604	25.8209	4.69046	-0.282371	0.104429
Clcn6	-0.426915	1	0.00412201	31.3182	35.359	33.3361	26.2498	26.8676	27.801	12.0989	11.4449	12.2423	13.7785	11.8565	13.4347	33.3378	5.05909	26.9728	4.75343	11.9287	3.57637	13.0232	3.70302	-0.305653	0.126649
Zfp961	0.41299	1	0.00413134	24.4674	30.5768	28.5738	32.0831	38.2117	39.8884	14.1479	14.33	14.3173	13.3855	14.3285	14.8166	27.8727	4.80078	36.7277	5.1988	14.2651	3.83442	14.1769	3.82547	0.398018	-0.00895044
Acyp1	0.505259	1	0.004137	39.4274	36.0836	46.1799	44.1143	50.5509	55.2567	22.073	22.3919	23.1877	17.7548	21.9047	19.085	40.5636	5.34212	49.9739	5.6431	22.5509	4.49511	19.5815	4.29142	0.300989	-0.203691
Aqr	-0.471452	1	0.0041891	366.731	381.124	327.878	335.232	282.01	286.299	53.4369	47.1575	53.3525	62.5117	56.0665	60.0188	358.577	8.48614	301.18	8.23448	51.3156	5.68133	59.5323	5.8956	-0.251657	0.214275
Ifnar2	-0.371264	1	0.00419814	80.9521	82.0213	79.949	68.9058	58.5116	70.7976	19.4385	19.5205	19.4528	20.6908	20.623	20.5129	80.9741	6.33939	66.0717	6.04596	19.4706	4.28323	20.6089	4.3652	-0.293429	0.0819704
Vac14	-0.438175	1	0.00419843	104.021	106.657	109.244	80.5723	87.5684	68.0348	48.3957	44.7703	45.3639	46.6526	45.2629	46.0927	106.641	6.73662	78.7252	6.29875	46.1766	5.52909	46.0027	5.52365	-0.437862	-0.00544332
Acbd4	0.538152	1	0.00425354	14.4008	15.6507	18.1834	19.3228	19.9019	24.0021	13.0638	14.2414	12.3979	11.6285	11.7878	12.9127	16.0783	4.00704	21.0756	4.3975	13.2344	3.72622	12.1097	3.59809	0.39046	-0.12813
Chtf8	0.487461	1	0.00426272	52.8495	40.5759	55.4159	65.0777	64.0842	69.4162	69.3195	78.5867	75.5806	67.7133	69.3192	76.3554	49.6138	5.63267	66.1927	6.0486	74.4956	6.21908	71.1293	6.15237	0.415931	-0.0667108
Rapgef1	-0.506672	1	0.00426272	31.4581	31.3014	25.9762	22.4217	21.8921	14.8502	85.0394	75.9471	74.5691	79.6192	69.8457	71.9872	29.5786	4.88648	19.7214	4.30169	78.5185	6.29496	73.8174	6.20589	-0.584793	-0.0890731
Ascc3	-0.460043	1	0.00426652	111.012	103.613	86.1544	97.1608	87.5684	84.7844	14.6683	12.1543	13.5651	16.7838	15.3928	17.1734	100.26	6.6476	89.8379	6.48925	13.4626	3.75088	16.45	4.04002	-0.15835	0.289138
Wrnip1	-0.381039	1	0.00434159	81.6511	77.8188	86.2988	65.9891	62.094	55.084	37.2508	36.9061	36.0525	35.6021	35.9586	35.1837	81.9229	6.35619	61.0557	5.93205	36.7365	5.19914	35.5814	5.15305	-0.424141	-0.0460891
Rpl37a	-0.742167	1	0.00440616	20.8322	23.1862	18.7606	11.8489	15.1255	11.5694	137.143	194.468	217.742	185.223	203.346	168.456	20.9264	4.38725	12.8479	3.68346	183.118	7.51663	185.675	7.53664	-0.703788	0.0200096
Smad4	-0.512238	1	0.00446928	44.1811	43.4742	36.511	37.3695	30.649	22.2753	19.4168	18.6952	18.6747	21.1763	18.4485	18.7856	41.3888	5.37117	30.0979	4.91159	18.9289	4.24252	19.4701	4.28319	-0.459574	0.0406723
Mtmr6	-0.426101	1	0.00447186	41.1052	43.4742	51.6638	32.2654	38.4107	33.8447	16.6306	17.3311	21.035	18.2403	17.3384	20.9045	45.4144	5.50508	34.8403	5.12268	18.3322	4.19631	18.8277	4.23479	-0.382394	0.0384765
Tep1	0.38309	1	0.00449578	33.5553	33.3302	37.5212	42.8382	38.4107	45.4141	14.2564	15.3668	15.3547	13.7553	13.8135	14.5709	34.8022	5.12111	42.221	5.39989	14.9926	3.90618	14.0466	3.81215	0.278782	-0.0940321
Sik3	-0.578942	1	0.00450887	65.7124	53.4732	58.0135	42.6559	48.7597	32.636	19.5361	17.1606	19.6862	20.7139	17.6817	20.344	59.0664	5.88427	41.3505	5.36983	18.7943	4.23222	19.5799	4.2913	-0.514431	0.0590787
Bckdk	-0.405894	1	0.00451624	53.6884	50.8648	48.3446	33.5414	37.2166	34.7081	33.8466	36.4901	32.8363	29.9612	31.747	32.3969	50.9659	5.67146	35.1554	5.13567	34.391	5.10396	31.3684	4.97124	-0.535788	-0.132721
Ric1	-0.430267	1	0.00454937	42.2237	40.1412	35.2122	27.8904	31.246	30.2185	17.9858	17.2424	18.4931	19.0957	16.9035	18.8777	39.1924	5.2925	29.785	4.89651	17.9071	4.16246	18.2923	4.19316	-0.395987	0.0307042
Ap4s1	-0.479105	1	0.00455235	22.0905	26.0845	24.966	18.5936	15.5235	13.1235	12.3916	12.1406	10.8936	11.3511	10.5289	10.1106	24.3804	4.60765	15.7469	3.97699	11.8086	3.56177	10.6635	3.41461	-0.630655	-0.147155
Casp3	-0.233024	1	0.00466679	578.549	651.678	747.826	525.725	566.21	583.303	135.636	148.845	159.98	136.976	147.29	159.72	659.351	9.3649	558.413	9.12519	148.154	7.21095	147.995	7.20941	-0.239715	-0.00154344
Irak1	0.925315	1	0.0046922	37.47	59.9944	25.1103	77.4734	85.3792	54.9113	46.4226	48.4465	46.8423	44.8725	41.9784	46.9986	40.8582	5.35256	72.588	6.18166	47.2372	5.56185	44.6165	5.4795	0.829103	-0.0823457
Smim7	0.480136	1	0.00470227	97.3103	96.9474	102.75	112.291	122.795	140.041	31.158	30.2151	26.5855	27.4876	27.3638	25.1345	99.0027	6.6294	125.042	6.96627	29.3195	4.87379	26.6619	4.73671	0.336876	-0.137081
Orc4	-0.40151	1	0.00478835	72.9827	81.8764	73.3107	60.5204	73.6371	66.9987	19.3084	18.1086	18.7525	21.3612	21.9276	21.9946	76.0566	6.249	67.0521	6.06721	18.7232	4.22675	21.7612	4.44368	-0.181791	0.21693
Uhrf2	-0.47857	1	0.00479498	67.1105	79.2679	87.0203	50.6767	67.2685	74.0785	25.1627	23.531	25.4443	27.0252	27.5812	30.685	77.7996	6.28169	64.0079	6.00018	24.7127	4.62718	28.4305	4.82937	-0.281513	0.202187
Cnih4	0.396201	1	0.00480426	62.9161	64.9214	55.8489	73.463	70.6518	78.2227	32.5023	35.8148	34.3926	32.3193	31.3579	30.9997	61.2288	5.93614	74.1125	6.21165	34.2366	5.09747	31.559	4.97998	0.275507	-0.117488
Nbea	-0.424936	1	0.00482351	70.3262	66.0808	64.6519	57.7861	56.5215	51.8031	14.7442	11.6086	14.2135	15.3736	13.8936	15.2235	67.0196	6.06651	55.3702	5.79104	13.5221	3.75725	14.8302	3.89047	-0.275474	0.133221
Itch	-0.383189	1	0.00496589	91.2983	96.6576	90.0509	78.3849	84.7822	78.2227	25.0652	23.1081	23.1359	27.4413	25.4983	27.7523	92.6689	6.53401	80.4633	6.33026	23.7697	4.57105	26.8973	4.74939	-0.203755	0.178339
Pus10	-0.46779	1	0.00500714	238.242	223.747	188.76	194.322	170.957	169.224	29.0656	25.4476	26.1186	30.3774	29.2292	31.5832	216.917	7.761	178.168	7.47709	26.8773	4.74831	30.3966	4.92584	-0.283906	0.177522
Topbp1	-0.452633	1	0.00513701	186.232	195.344	181.545	154.947	139.114	134.17	91.9562	83.2042	89.4569	96.4493	84.6892	93.7131	187.707	7.55234	142.744	7.15728	88.2058	6.4628	91.6172	6.51755	-0.395053	0.054745
Coa3	0.533581	1	0.00514566	43.2024	42.6047	64.5076	52.3173	64.4822	76.4959	27.1792	32.7388	30.9689	23.7887	28.2793	29.257	50.1049	5.64688	64.4318	6.0097	30.2956	4.92104	27.1083	4.76066	0.362822	-0.160372
Ces2g	-0.227179	1	0.00514727	751.638	799.635	856.638	706.558	751.695	709.185	145.523	154.513	152.666	148.234	158.254	171.519	802.637	9.6486	722.479	9.49681	150.901	7.23746	159.336	7.31593	-0.151791	0.0784723
Map3k4	-0.482795	1	0.00515482	48.0959	41.0106	47.1901	31.3539	31.445	37.6436	8.82485	10.415	12.5276	10.1027	10.1856	12.1143	45.4322	5.50564	33.4809	5.06526	10.5892	3.40452	10.8009	3.43307	-0.440379	0.0285576
Rps2	-0.510241	1	0.00520055	210.839	179.114	176.638	142.551	139.711	93.591	808.124	873.375	853.2	818.825	837.61	729.422	188.864	7.5612	125.285	6.96906	844.899	9.72264	795.286	9.63533	-0.592137	-0.0873065
Zfp36l2	0.451202	1	0.00522485	158.828	122.887	156.146	212.551	180.908	179.757	251.519	209.528	229.284	247.989	202.453	212.323	145.954	7.18937	191.072	7.57797	230.11	7.84618	220.922	7.78739	0.388605	-0.0587905
Git1	-0.56359	1	0.00534922	29.3609	20.143	21.5025	18.4113	15.5235	13.4688	28.3501	28.9533	27.7267	28.551	26.7458	28.4509	23.6688	4.56492	15.8012	3.98196	28.3434	4.82494	27.9159	4.80302	-0.582952	-0.0219246
D15Ertd621e	-0.483949	1	0.00539727	52.8495	62.1681	62.9202	45.7549	43.7842	35.9168	60.6139	57.7225	56.5687	62.4655	53.8463	55.7196	59.3126	5.89027	41.8186	5.38607	58.3017	5.86547	57.3438	5.84157	-0.504192	-0.023901
Epc2	-0.408801	1	0.00541455	28.522	26.0845	28.2852	26.7967	24.0813	19.8579	17.0317	15.169	15.4066	18.9801	17.7504	16.8357	27.6306	4.78819	23.5786	4.55941	15.8691	3.98815	17.8554	4.15829	-0.228785	0.170137
Copa	-0.252773	1	0.00542148	327.164	322.868	311.282	303.513	305.693	298.731	54.4885	51.7341	53.7675	59.2058	56.799	63.7498	320.438	8.3239	302.646	8.24149	53.33	5.73688	59.9182	5.90492	-0.082413	0.168045
Fads1	-0.45681	1	0.00542148	151.558	136.944	150.662	122.864	107.271	100.153	54.8246	55.5945	56.6725	55.8305	56.2954	60.1646	146.388	7.19365	110.096	6.78262	55.6972	5.79953	57.4302	5.84374	-0.411035	0.0442042
Sf3a1	-0.254094	1	0.00542148	274.174	283.307	295.84	269.79	270.467	248.655	81.9063	75.913	78.6153	85.7455	84.1856	90.5118	284.44	8.15198	262.971	8.03876	78.8115	6.30033	86.8143	6.43986	-0.113225	0.139527
Cad	-0.231557	1	0.00546578	761.285	666.894	648.828	714.943	605.416	596.081	98.8946	84.7934	93.1141	106.228	91.9106	100.715	692.336	9.43533	638.813	9.31925	92.2674	6.52775	99.6178	6.63833	-0.116077	0.110583
Prpf19	-0.249115	1	0.00584241	314.72	282.437	303.056	275.076	263.103	234.495	117.628	115.036	117.702	122.85	116.242	117.85	300.071	8.22916	257.558	8.00876	116.789	6.86776	118.98	6.89458	-0.220405	0.0268218
Ier5	0.43254	1	0.00585532	21.8109	19.8532	20.348	22.4217	24.0813	26.7649	20.5226	18.1564	18.545	17.5005	16.6975	16.0065	20.6707	4.36952	24.4227	4.61015	19.0747	4.25359	16.7348	4.06478	0.240632	-0.188803
Itsn2	-0.407655	1	0.00589521	133.382	128.973	122.665	114.296	103.291	102.225	24.2304	24.4654	25.3924	25.7537	26.5283	29.0805	128.34	7.00383	106.604	6.73612	24.6961	4.62621	27.1208	4.76133	-0.267714	0.13512
Cenpm	0.563961	1	0.00595947	23.7683	15.7956	18.3277	26.0675	21.096	25.3835	12.9662	12.7477	12.0867	10.0102	11.3873	10.5789	19.2972	4.27032	24.1824	4.59588	12.6002	3.65537	10.6588	3.41397	0.325564	-0.241402
Pacs2	-0.570537	1	0.00596168	14.9601	11.5931	14.2869	9.11452	7.96077	8.97921	19.5469	18.7225	18.3375	18.4484	16.6517	18.8394	13.6134	3.76695	8.68483	3.1185	18.869	4.23794	17.9798	4.16831	-0.648454	-0.0696381
Tbl1x	-0.404914	1	0.00601723	48.6551	49.9953	42.5721	42.4737	37.4156	36.7802	18.582	15.9056	14.8879	19.7199	16.6059	17.6648	47.0742	5.55686	38.8898	5.28132	16.4585	4.04076	17.9969	4.16967	-0.275543	0.128912
Zzz3	-0.429003	1	0.00605055	39.5672	39.1268	43.1494	29.1665	34.2313	32.636	47.214	41.2781	42.7184	49.1494	44.9425	45.1407	40.6145	5.34392	32.0112	5.00051	43.7368	5.45078	46.4109	5.53639	-0.343415	0.0856139
Ccne2	-0.411592	1	0.0060534	57.3236	67.0951	52.0967	43.2028	45.3764	44.2053	21.8778	22.3237	22.4615	22.4247	21.7788	22.4706	58.8385	5.87869	44.2615	5.46798	22.221	4.47385	22.2247	4.47409	-0.410708	0.000239118
Snrnp25	0.446171	1	0.00605461	20.273	20.5778	25.1103	22.604	29.8529	27.283	24.2954	29.1034	25.548	21.2688	26.3452	22.4782	21.987	4.45858	26.58	4.73227	26.3156	4.71785	23.3641	4.54622	0.273686	-0.171627
Psmd5	-0.251292	1	0.00607076	311.784	343.156	331.774	280.909	269.87	284.917	47.0948	46.2776	49.5139	47.5542	48.1813	48.2039	328.905	8.36153	278.566	8.12187	47.6287	5.57376	47.9798	5.58435	-0.239653	0.0105941
G6pc3	0.461138	1	0.00612806	20.5526	24.7803	27.708	30.0779	28.6588	31.9453	13.8335	14.255	12.4757	12.2527	12.4974	12.2832	24.3469	4.60567	30.2273	4.91778	13.5214	3.75718	12.3444	3.62579	0.312112	-0.131389
Trappc1	0.462334	1	0.00613302	152.816	145.494	142.869	164.608	150.658	187.7	23.2655	25.6999	24.2252	19.5811	20.932	20.083	147.06	7.20026	167.655	7.38935	24.3969	4.60862	20.1987	4.33619	0.189096	-0.272434
Commd8	0.387354	1	0.00623405	22.51	24.0557	22.2241	27.7081	28.0617	27.4557	22.7343	22.2214	21.2684	20.8064	20.6916	19.822	22.9299	4.51916	27.7418	4.79399	22.0747	4.46432	20.44	4.35332	0.274831	-0.110998
Junb	0.386565	1	0.00624541	24.0479	25.6498	27.5637	31.1717	35.6244	31.9453	12.6518	12.9864	13.4354	12.4838	13.0353	12.5672	25.7538	4.68671	32.9138	5.04062	13.0245	3.70316	12.6955	3.66624	0.353907	-0.0369205
Fnta	-0.298441	1	0.00625464	117.583	127.234	119.924	92.7858	100.903	95.6631	36.7413	37.2199	36.3897	37.937	36.0043	33.963	121.58	6.92577	96.4505	6.59172	36.7836	5.20099	35.9681	5.16865	-0.334049	-0.0323443
Galc	-0.400817	1	0.00632322	66.9707	63.3274	64.219	58.3329	48.1626	46.1048	11.1449	10.4491	11.8014	11.2817	11.2957	11.5999	64.839	6.01879	50.8668	5.66865	11.1318	3.47661	11.3924	3.51001	-0.350139	0.0333918
Ap2a2	-0.452983	1	0.00640826	213.216	206.357	203.913	171.353	160.21	137.624	38.3675	38.6658	41.7846	41.8209	39.4148	40.88	207.829	7.69925	156.396	7.28906	39.606	5.30765	40.7052	5.34714	-0.410195	0.0394959
Cuta	0.273455	1	0.00641607	133.522	116.511	113.285	133.801	134.736	130.544	43.4629	44.8589	42.874	40.8962	40.0099	38.3696	121.106	6.92013	133.027	7.05558	43.7319	5.45062	39.7586	5.31319	0.135449	-0.137422
Tmem183a	-0.549429	1	0.00644304	13.5619	14.3465	19.1935	11.8489	10.747	8.2885	37.1099	35.2146	34.6519	34.7236	33.7498	33.917	15.7006	3.97275	10.2948	3.36384	35.6588	5.15619	34.1301	5.09297	-0.608907	-0.0632135
Raf1	-0.386195	1	0.00645474	37.0506	38.8369	38.0984	29.3488	29.6539	26.5923	27.9815	27.2277	26.2224	28.8284	25.8187	25.4032	37.9953	5.24775	28.5316	4.83449	27.1439	4.76255	26.6835	4.73787	-0.41326	-0.0246806
Tmpo	-0.222807	1	0.00645474	779.88	740.8	689.236	691.245	651.788	597.463	194.19	170.992	177.228	192.945	177.149	184.401	736.639	9.52481	646.832	9.33725	180.803	7.49828	184.832	7.53007	-0.187566	0.0317922
Map2k1	-0.382692	1	0.00648396	36.6312	36.9531	41.4176	29.8956	32.8382	27.6283	10.3426	10.2445	10.8158	10.75	10.3229	11.0011	38.3339	5.26055	30.1207	4.91268	10.4676	3.38786	10.6913	3.41837	-0.347867	0.0305085
Csnk1a1	-0.440081	1	0.00655234	387.284	418.656	348.37	292.758	302.31	281.636	153.925	136.098	138.011	155.863	140.138	145.172	384.77	8.58785	292.235	8.19098	142.678	7.15662	147.058	7.20024	-0.396867	0.043618
Tmem201	-0.501119	1	0.00656801	27.4035	22.4617	24.8217	22.2394	19.7029	15.7136	16.6198	14.9507	14.0838	15.9285	16.4686	16.9969	24.8956	4.63782	19.2186	4.26443	15.2181	3.92772	16.4646	4.0413	-0.373385	0.113584
Ankib1	-0.479479	1	0.00663155	25.1664	24.3455	26.6978	17.3176	22.0911	15.7136	27.0166	25.3316	23.888	25.615	24.5827	26.2169	25.4033	4.66694	18.3741	4.1996	25.4121	4.66744	25.4716	4.67082	-0.467339	0.00337274
Fads2	-0.435019	1	0.00668256	460.686	445.32	468.726	366.404	336.342	319.28	87.186	82.4198	94.8519	95.4552	83.785	86.4814	458.244	8.83997	340.675	8.41225	88.1526	6.46193	88.5739	6.46881	-0.427719	0.00687859
Bzw1	-0.46775	1	0.0066867	161.205	160.42	171.154	126.692	129.761	102.57	200.792	195.621	178.499	187.558	190.551	198.381	164.26	7.35983	119.674	6.90297	191.637	7.58224	192.163	7.58619	-0.456867	0.00395434
Cdipt	-0.413759	1	0.00671747	110.732	112.453	117.182	85.8588	78.4136	68.3801	47.7778	49.8311	45.7011	42.0289	44.2444	43.874	113.456	6.82599	77.5508	6.27707	47.77	5.57803	43.3825	5.43904	-0.548915	-0.138993
Isg20l2	-0.353589	1	0.00681344	79.8336	72.7468	75.331	59.4267	63.6861	56.4654	67.2054	67.0053	63.468	68.43	64.2951	66.0913	75.9705	6.24737	59.8594	5.90351	65.8929	6.04205	66.2721	6.05033	-0.343861	0.0082784
Golga4	-0.400435	1	0.00682859	40.1265	44.0538	47.1901	42.8382	33.6342	36.4349	24.0678	22.7875	26.4817	27.2795	26.2536	29.495	43.7902	5.45253	37.6358	5.23403	24.4457	4.61151	27.6761	4.79057	-0.218502	0.179059
Gpx4	0.430533	1	0.00683881	63.8948	53.0385	55.8489	67.812	70.8508	68.0348	78.3828	85.8028	78.9784	69.1929	77.5135	68.9318	57.5941	5.84785	68.8992	6.10642	81.0547	6.34082	71.8794	6.16751	0.258567	-0.173318
Psma4	-0.463217	1	0.00693534	320.732	365.038	277.224	238.436	234.047	257.462	90.9588	99.2189	98.1459	99.0385	103.046	100.024	320.998	8.32642	243.315	7.92668	96.1079	6.58658	100.703	6.65396	-0.399742	0.0673767
Mrps35	-0.42862	1	0.00694744	100.945	98.8313	92.5042	85.4942	73.8361	70.6249	10.8955	12.2157	12.6314	12.2295	13.1039	12.2755	97.427	6.60625	76.6517	6.26025	11.9142	3.57461	12.5363	3.64804	-0.346003	0.0734355
Sae1	-0.247914	1	0.00695954	279.487	298.088	313.879	243.722	258.128	231.733	80.627	83.0337	83.4914	80.0816	78.5664	82.8885	297.152	8.21505	244.528	7.93385	82.384	6.36429	80.5122	6.33113	-0.281202	-0.0331582
Tomm70a	-0.432462	1	0.00696152	393.435	394.311	348.514	306.977	320.023	268.513	113.899	106.606	109.195	120.053	112.946	117.205	378.753	8.56512	298.504	8.22161	109.9	6.78005	116.734	6.86709	-0.343508	0.0870401
1110059G10Rik	0.537228	1	0.00698329	11.3249	11.4482	12.6995	16.2238	17.1157	18.1311	11.9363	12.202	10.7379	10.4263	12.6805	11.9147	11.8242	3.56367	17.1569	4.10071	11.6254	3.53921	11.6738	3.54521	0.537044	0.00599572
Cct7	-0.232189	1	0.00699841	498.016	529.081	478.395	454.997	455.157	453.623	99.2416	106.81	106.575	103.5	113.873	115.001	501.831	8.97106	454.592	8.82843	104.209	6.70334	110.791	6.7917	-0.142628	0.0883657
Ttc37	-0.372125	1	0.00710731	42.3635	46.0826	43.7266	39.0101	41.993	38.8523	9.89814	10.2513	10.2192	11.8365	11.3071	12.5058	44.0576	5.46132	39.9518	5.32019	10.1229	3.33955	11.8832	3.57085	-0.141129	0.231299
Erbb2ip	-0.384229	1	0.00725163	96.1917	96.8025	95.1018	80.5723	83.7871	76.8413	37.6303	31.4429	33.4329	40.9424	34.6081	36.3736	96.032	6.58544	80.4002	6.32913	34.1687	5.0946	37.308	5.22141	-0.256316	0.126813
Hmgcs1	-0.203996	1	0.00725163	1880.35	1602.89	1406.18	1746.34	1614.05	1455.32	242.195	204.931	199.378	264.842	240.666	228.49	1629.81	10.6705	1605.24	10.6486	215.502	7.75155	244.666	7.93467	-0.0219163	0.183117
2410002F23Rik	0.716667	1	0.00728135	9.64714	5.79656	7.50424	14.0364	11.7421	12.6054	43.3653	42.5058	34.211	37.7521	42.1386	41.8396	7.64931	2.93533	12.7946	3.67747	40.0274	5.32292	40.5768	5.34258	0.742138	0.0196665
Cdc42se2	0.49375	1	0.00736094	17.6165	20.4329	23.9558	23.3332	26.6686	29.0097	31.4507	29.9014	28.2714	27.0715	26.6084	27.9289	20.6684	4.36936	26.3372	4.71903	29.8745	4.90084	27.2029	4.76569	0.349673	-0.135153
Gnb2l1	-0.39091	1	0.00741157	5000.01	5101.98	5263.36	4038.46	4232.14	3250.99	851.684	939.125	918.328	860.715	926.328	868.829	5121.79	12.3224	3840.53	11.9071	903.046	9.81866	885.29	9.79001	-0.415341	-0.0286481
Atg4b	0.371765	1	0.00742362	54.2477	48.5462	51.9524	65.0777	60.1038	68.3801	19.7312	20.7277	18.9859	19.4424	18.7575	19.5994	51.5821	5.6888	64.5205	6.01169	19.815	4.30852	19.2664	4.26802	0.322888	-0.0405004
Ndufa11	0.558417	1	0.00747983	41.245	40.1412	56.859	51.2236	61.895	63.8905	39.2023	41.9738	45.8049	37.7521	38.7739	33.6099	46.0817	5.52612	59.003	5.88272	42.327	5.40351	36.712	5.19818	0.356594	-0.205328
Plbd2	-0.419295	1	0.00751986	42.5033	40.2861	40.6961	32.8123	30.4499	25.7289	15.2863	15.1008	12.8388	15.1887	12.9895	13.5729	41.1618	5.36323	29.6637	4.89063	14.4086	3.84886	13.917	3.79878	-0.472609	-0.0500813
Rnf216	-0.384905	1	0.00755192	85.7057	81.5865	77.3514	65.9891	67.2685	64.5812	25.9975	27.521	28.1936	26.9559	27.9703	31.0611	81.5479	6.34958	65.9463	6.04322	27.2374	4.76752	28.6624	4.84109	-0.306356	0.0735733
Ccdc124	0.501048	1	0.00767662	54.1079	54.1978	57.0034	59.609	63.4871	79.2588	31.2881	32.5273	27.7786	24.6672	29.1605	25.741	55.103	5.78406	67.4516	6.07578	30.5313	4.93222	26.5229	4.72917	0.291722	-0.203053
Ctsc	-0.263645	1	0.00772174	217.27	225.631	210.263	199.061	171.157	174.577	27.2117	24.4995	24.4327	25.6612	24.8231	25.4569	217.721	7.76634	181.598	7.5046	25.3813	4.6657	25.3137	4.66185	-0.261735	-0.00384624
Snapc5	0.534474	1	0.00772174	54.8069	40.7208	51.5195	60.885	62.8901	75.6326	9.34523	11.0289	12.1385	9.36288	10.5289	10.3102	49.0157	5.61517	66.4692	6.05461	10.8375	3.43797	10.0673	3.33161	0.439441	-0.106356
Cbfa2t3	-0.268047	1	0.00776304	132.124	135.205	124.974	120.676	119.412	105.851	47.5392	49.0604	47.5945	49.265	51.0309	52.2727	130.768	7.03086	115.313	6.84941	48.0647	5.58691	50.8562	5.66835	-0.181452	0.081445
Tnpo3	-0.450258	1	0.00781204	169.454	164.332	155.713	139.27	126.974	117.248	32.1229	33.5572	31.306	32.3424	33.7269	37.4714	163.166	7.3502	127.831	6.99809	32.3287	5.01474	34.5136	5.10909	-0.352111	0.0943477
Zpr1	-0.261669	1	0.00809387	148.762	164.043	169.711	127.786	149.662	143.149	41.0453	44.2451	47.1795	45.2424	47.3	45.6244	160.838	7.32947	140.199	7.13133	44.1566	5.46456	46.0556	5.5253	-0.198136	0.0607467
Akt2	-0.427868	1	0.00810842	36.4913	39.4166	40.8404	30.0779	26.2705	24.6928	74.0246	74.2897	74.3875	74.2789	67.2821	66.4981	38.9161	5.2823	27.0138	4.75562	74.2339	6.21401	69.353	6.11589	-0.526673	-0.0981198
Ccdc86	0.52752	1	0.00810842	59.281	41.1556	37.0883	91.5098	74.4332	76.4959	33.4455	26.4979	21.6834	33.822	33.292	32.0898	45.8416	5.51859	80.813	6.33651	27.2089	4.76601	33.0679	5.04736	0.81793	0.281352
Med14	-0.441688	1	0.00813503	82.49	86.5136	78.6502	62.5256	72.841	54.0479	29.6619	27.446	28.012	29.5913	27.8444	30.4854	82.5513	6.36722	63.1382	5.98044	28.3733	4.82646	29.307	4.87318	-0.386778	0.046713
Zc3h7b	-0.383523	1	0.00815794	58.8615	56.5164	61.477	47.3955	42.3911	39.025	38.7252	39.6412	39.0094	37.0816	35.352	39.0529	58.9517	5.88146	42.9372	5.42416	39.1253	5.29003	37.1622	5.21576	-0.457304	-0.0742653
Tvp23b	0.448997	1	0.00817251	28.2423	34.6344	40.5518	38.281	48.1626	49.9037	21.7477	23.8311	21.3981	20.0666	22.5456	22.6241	34.4762	5.10753	45.4491	5.50618	22.3256	4.48063	21.7455	4.44264	0.398652	-0.0379869
Ddx27	-0.243348	1	0.00820321	292.77	262.294	301.324	260.493	252.356	249.346	88.964	86.7441	86.7336	89.0977	93.5472	93.7899	285.463	8.15716	254.065	7.98905	87.4805	6.45089	92.1449	6.52583	-0.168104	0.0749424
2010107E04Rik	0.458207	1	0.00836221	107.656	116.511	144.168	139.088	170.559	173.54	50.3472	54.9943	53.6638	49.7042	52.9879	49.2172	122.778	6.93991	161.062	7.33148	53.0017	5.72797	50.6365	5.6621	0.391564	-0.0658634
Casc5	-0.526638	1	0.00837132	198.675	196.648	152.827	199.061	143.294	160.072	15.7091	11.8201	12.8388	17.9166	15.5759	18.9238	182.717	7.51346	167.476	7.38781	13.456	3.75018	17.4721	4.12698	-0.125658	0.376805
Polr3c	-0.344224	1	0.00839471	64.1744	72.7468	70.2801	57.0569	55.3273	60.6097	24.7833	24.7041	24.8218	26.4473	25.3953	27.1996	69.0671	6.10993	57.6646	5.84961	24.7697	4.63051	26.3474	4.71959	-0.260312	0.0890819
Asns	-0.215154	1	0.00842315	937.31	903.538	857.648	870.983	838.468	796.387	112.045	112.99	110.829	116.377	121.071	123.891	899.499	9.81298	835.279	9.70611	111.955	6.80677	120.447	6.91225	-0.106863	0.105479
Tm2d2	0.472268	1	0.00843286	21.8109	19.5634	18.1834	26.6144	25.4745	21.5846	11.6978	13.0409	12.1126	10.8656	10.4946	11.3389	19.8525	4.31125	24.5578	4.61811	12.2838	3.61868	10.8997	3.44622	0.306859	-0.172467
Pdia3	-0.415211	1	0.00844735	1187.02	1256.4	1161.28	1047.99	1027.93	1109.62	103.795	115.411	111.711	111.569	133.088	146.086	1201.57	10.2307	1061.85	10.0524	110.306	6.78536	130.247	7.02511	-0.17834	0.239748
Capn1	-0.246107	1	0.00851952	287.876	280.843	279.1	242.811	242.803	219.3	54.5753	57.5998	57.0356	53.6805	55.6545	57.0171	282.606	8.14265	234.971	7.87634	56.4035	5.81771	55.4507	5.79313	-0.266309	-0.0245802
Elovl6	-0.397847	1	0.00853188	57.4634	57.8207	51.2309	46.8486	40.0029	42.9966	54.8246	51.8091	49.6954	55.7612	49.3257	55.6352	55.505	5.79455	43.2827	5.43572	52.1097	5.70348	53.574	5.74346	-0.358827	0.0399816
Glg1	-0.4556	1	0.00854762	346.877	330.259	317.054	318.461	225.489	242.439	19.5036	15.701	18.2597	20.6446	17.2011	19.3767	331.397	8.37242	262.13	8.03414	17.8214	4.15554	19.0741	4.25355	-0.33828	0.0980058
Lsm1	0.445748	1	0.00877337	29.9201	25.5049	35.0679	33.3591	39.8038	37.989	21.1298	22.1123	21.3721	17.7317	20.7145	19.8527	30.1643	4.91477	37.0506	5.21143	21.5381	4.42882	19.433	4.28043	0.296657	-0.148383
Prkar2a	-0.462723	1	0.00880005	69.2077	72.6019	65.6621	45.0257	55.9244	39.025	59.8984	54.7829	56.0241	55.2526	49.7377	52.8715	69.1572	6.11181	46.6584	5.54406	56.9018	5.8304	52.6206	5.71756	-0.567744	-0.112846
Gusb	-0.442053	1	0.00880713	176.305	173.897	208.82	149.296	127.77	128.817	46.0106	44.4429	48.1651	48.1322	43.7751	44.9104	186.341	7.5418	135.294	7.07996	46.2062	5.53001	45.6059	5.51115	-0.461839	-0.0188658
Pwp2	-0.248105	1	0.00884831	237.543	235.775	225.416	208.722	207.975	207.04	40.3406	40.2278	40.5137	42.422	42.8252	42.9451	232.911	7.86364	207.912	7.69983	40.3607	5.33488	42.7308	5.4172	-0.163805	0.0823249
Ubxn2a	0.375745	1	0.00884831	33.8349	32.1709	30.5942	39.557	42.3911	45.2414	33.142	31.8998	32.4732	34.4924	30.7742	33.917	32.2	5.00899	42.3965	5.40587	32.505	5.02259	33.0612	5.04707	0.396885	0.0244773
Tmem251	0.451249	1	0.00891055	31.7377	28.9828	32.4703	36.2758	35.2264	42.4786	23.71	22.3783	22.4356	22.1704	21.0807	18.4248	31.0636	4.95715	37.9936	5.24768	22.8413	4.51357	20.5586	4.36167	0.290532	-0.151899
Pgs1	-0.504422	1	0.00904969	14.6804	17.6795	13.5654	11.302	10.15	11.0513	23.5365	24.9497	22.1243	22.7946	24.4797	23.9369	15.3084	3.93625	10.8344	3.43755	23.5368	4.55685	23.7371	4.56907	-0.498702	0.0122211
Edf1	0.392796	1	0.00905626	76.1984	73.4714	76.6298	90.2337	99.1116	94.4544	52.7648	54.6533	58.2287	51.9004	56.8218	49.2786	75.4332	6.23713	94.5999	6.56377	55.2156	5.787	52.667	5.71883	0.326639	-0.0681769
Arhgef12	-0.387585	1	0.00910802	41.9441	38.692	38.5314	30.2602	32.2411	26.5923	33.5539	28.5509	29.2311	32.7354	27.0548	29.2954	39.7225	5.31188	29.6979	4.89229	30.4453	4.92815	29.6952	4.89216	-0.419597	-0.0359904
Zfp865	-0.548908	1	0.00912947	13.5619	9.85415	11.4007	11.8489	7.96077	6.38905	12.8578	11.2198	11.4901	13.7091	12.4974	12.5442	11.6056	3.53675	8.7329	3.12646	11.8559	3.56754	12.9169	3.69119	-0.410286	0.123651
Ppp3cb	-0.41049	1	0.00924682	117.583	134.48	129.015	98.2545	101.301	97.5625	53.0575	48.1533	50.4995	52.7096	51.9694	52.5414	127.026	6.98898	99.0393	6.62993	50.5701	5.66021	52.4068	5.71168	-0.359053	0.0514695
Maml1	-0.552074	1	0.00925682	11.1851	12.7524	12.1222	8.38536	9.55292	7.42511	13.7793	13.2115	13.0723	13.2005	13.7219	14.118	12.0199	3.58735	8.45446	3.07971	13.3544	3.73924	13.6801	3.77401	-0.507641	0.0347732
Ccdc62	0.586272	1	0.00945999	5.87217	9.41941	9.3803	10.2083	14.7274	12.6054	10.4185	10.3536	10.5564	11.0736	10.3916	10.4023	8.22396	3.03983	12.5137	3.64544	10.4428	3.38444	10.6225	3.40905	0.605604	0.0246107
Eif2d	-0.439095	1	0.00947719	42.6431	49.9953	51.8081	33.1768	36.8186	31.4272	17.6172	19.2272	16.2885	15.6048	16.9722	18.1407	48.1489	5.58943	33.8075	5.07927	17.7109	4.14657	16.9059	4.07946	-0.510156	-0.0671142
Tsg101	0.364388	1	0.0094915	47.3968	47.097	55.8489	56.1454	59.9048	64.9266	22.4741	24.3699	22.7727	21.315	21.55	22.6625	50.1142	5.64715	60.3256	5.9147	23.2056	4.5364	21.8425	4.44907	0.26755	-0.0873347
Tmem256	0.458708	1	0.00953888	51.032	46.0826	57.7249	55.9631	65.4773	65.6173	18.8639	22.999	19.7122	15.4199	19.2725	19.5072	51.6132	5.68967	62.3526	5.96238	20.525	4.35931	18.0665	4.17525	0.27271	-0.184064
Cox19	0.447774	1	0.00966491	45.9987	52.3139	64.0747	66.7183	60.7009	69.7615	15.0695	17.2356	15.8475	13.8016	15.038	14.4635	54.1291	5.75833	65.7269	6.03841	16.0509	4.00458	14.4344	3.85144	0.28008	-0.153143
Lman1	-0.258331	1	0.0096819	147.923	162.449	164.372	139.27	145.085	140.386	34.7248	33.5027	35.041	37.4284	35.2833	37.9013	158.248	7.30604	141.58	7.14548	34.4228	5.10529	36.871	5.20442	-0.160562	0.0991228
4932438A13Rik	-0.39977	1	0.00983087	85.2863	76.2247	66.6723	68.3589	60.3028	62.6818	18.1376	16.649	18.7784	20.6446	18.0594	20.3287	76.0611	6.24909	63.7812	5.99506	17.855	4.15826	19.6776	4.29848	-0.254028	0.140222
Mbd3	0.277976	1	0.00983087	76.1984	76.6595	80.8149	78.9317	83.7871	75.1145	88.9423	91.689	85.0217	74.9493	74	73.8988	77.8909	6.28338	79.2778	6.30884	88.551	6.46844	74.2827	6.21495	0.0254614	-0.253482
Hmgn1	0.609808	1	0.00991375	11.8842	13.9117	15.73	17.4999	19.7029	22.7934	179.337	161.6	179.433	185.547	163.793	143.982	13.842	3.79098	19.9987	4.32184	173.457	7.43843	164.441	7.36142	0.530857	-0.0770065
Uros	0.34023	1	0.00996812	31.7377	38.2573	35.2122	36.8227	43.3862	44.378	10.6462	12.809	11.9829	9.94084	11.7878	11.5308	35.0691	5.13213	41.5289	5.37605	11.8127	3.56227	11.0865	3.47073	0.243919	-0.0915368
Acly	-0.212418	1	0.0099769	859.993	771.812	818.539	790.047	777.17	743.375	136.677	131.378	138.115	146.755	140.378	156.611	816.781	9.67381	770.197	9.58908	135.39	7.08098	147.914	7.20862	-0.0847224	0.127643
Rpl4	-0.372877	1	0.0100053	3687.86	3692.41	3177.32	3048.81	3038.82	2475.84	1119.62	1186.34	1192.61	1189.04	1274.62	1210.72	3519.2	11.781	2854.49	11.479	1166.19	10.1876	1224.79	10.2583	-0.302013	0.0707347
Shoc2	-0.334533	1	0.0100223	98.0093	100.425	97.1222	74.1922	84.1851	75.6326	49.7509	48.6102	51.4073	48.9413	48.5017	51.7123	98.519	6.62233	78.0033	6.28546	49.9228	5.64163	49.7184	5.63571	-0.336866	-0.00591825
Ccng1	-0.329598	1	0.0100411	95.0732	97.9618	90.6281	84.5827	76.6224	77.1866	33.9767	31.4974	33.0438	36.5962	33.0173	34.3239	94.5544	6.56307	79.4639	6.31223	32.8393	5.03735	34.6458	5.11461	-0.250844	0.0772552
Cox8a	0.483943	1	0.0101525	177.563	163.898	208.531	206.9	257.133	226.207	198.516	205.211	197.148	189.385	188.101	160.58	183.331	7.5183	230.08	7.84599	200.291	7.64596	179.355	7.48668	0.327686	-0.15928
Tnk2	-0.609897	1	0.0101988	19.9933	17.9693	17.8947	15.3124	14.1304	7.07976	36.9906	35.8694	35.041	37.3359	32.3307	36.6423	18.6191	4.21871	12.1742	3.60575	35.967	5.1686	35.4363	5.14716	-0.612962	-0.0214459
Rad23b	-0.394511	1	0.010317	720.599	700.514	682.164	571.663	561.632	492.993	185.116	182.328	188.199	188.76	185.893	189.514	701.092	9.45346	542.096	9.0824	185.214	7.53305	188.056	7.55502	-0.371057	0.0219658
Man1a	-0.378261	1	0.0104191	81.5113	101.15	123.82	65.0777	85.3792	88.4107	20.0023	22.6307	25.3924	21.1069	21.8704	26.3782	102.16	6.67469	79.6225	6.3151	22.6751	4.50304	23.1185	4.53098	-0.359588	0.0279387
Jak2	-0.462075	1	0.0104429	37.8895	40.431	40.5518	30.0779	34.2313	23.1387	39.9503	38.3248	38.1016	40.2488	36.5651	40.381	39.6241	5.30831	29.1493	4.86539	38.7922	5.2777	39.065	5.2878	-0.442915	0.0101086
Atp6v1b2	-0.206334	1	0.010449	1036.86	1015.27	998.353	944.446	891.208	878.754	165.992	160.788	154.741	160.695	161.344	171.811	1016.83	9.98986	904.803	9.82146	160.507	7.32649	164.617	7.36297	-0.168397	0.0364768
Fkbp4	-0.416791	1	0.0104615	265.226	255.338	282.275	207.993	204.393	187.7	81.3425	85.1344	90.7797	83.5955	84.3229	88.8229	267.613	8.06401	200.029	7.64406	85.7522	6.4221	85.5804	6.41921	-0.419942	-0.00289303
Ifrd2	0.373906	1	0.0104615	53.4088	60.7189	66.2393	68.3589	66.0744	71.8337	76.7675	79.4802	77.8371	68.3375	70.0517	68.8089	60.1224	5.90983	68.7556	6.10341	78.0283	6.28592	69.066	6.1099	0.193577	-0.17602
Ube2b	0.364475	1	0.0105377	53.269	49.1258	47.9117	61.6141	58.3126	58.3648	33.6515	35.3442	34.4185	29.3833	33.0402	32.6349	50.1022	5.6468	59.4305	5.89313	34.4714	5.10733	31.6861	4.98578	0.246332	-0.121548
St3gal6	-0.485525	1	0.0105458	42.2237	51.0097	47.6231	37.1872	38.2117	32.1179	48.2114	40.4869	39.3725	51.5999	42.356	42.4538	46.9522	5.55312	35.839	5.16346	42.6903	5.41584	45.4699	5.50684	-0.389663	0.0910047
Cep57	-0.34328	1	0.0105714	96.0519	84.4848	76.1969	82.0307	80.6028	68.8981	34.779	29.7241	28.6864	38.3994	33.5896	34.3008	85.5779	6.41917	77.1772	6.2701	31.0632	4.95713	35.4299	5.1469	-0.149063	0.189764
Spats2	-0.546918	1	0.0106993	29.5007	26.0845	25.2547	18.5936	27.8627	15.5409	11.9363	10.6196	10.1933	12.2758	12.2113	11.6307	26.9466	4.75203	20.6657	4.36917	10.9164	3.44843	12.0392	3.58967	-0.382862	0.141246
Gars	-0.21654	1	0.0107997	692.217	689.356	606.833	648.225	639.25	564.654	99.5343	93.3055	96.2525	109.765	104.66	98.1734	662.802	9.37243	617.376	9.27001	96.3641	6.59042	104.2	6.7032	-0.102428	0.112782
Tnrc6c	-0.432447	1	0.0108007	34.6738	33.0404	33.4805	26.6144	29.0568	21.412	26.442	22.3919	25.7296	27.8575	22.992	25.3111	33.7315	5.07603	25.6944	4.68338	24.8545	4.63544	25.3868	4.66601	-0.392645	0.0305726
Apc	-0.474966	1	0.010819	18.4554	20.8676	18.6163	16.7707	15.5235	13.4688	13.3457	11.8201	12.346	14.1946	12.3486	14.4865	19.3131	4.27151	15.2543	3.93115	12.5039	3.64431	13.6766	3.77363	-0.34036	0.129324
Slc25a3	-0.203416	1	0.0108277	960.379	944.984	924.609	850.931	844.04	788.098	243.106	248.671	235.794	237.147	255.029	242.217	943.324	9.88161	827.69	9.69295	242.524	7.92198	244.798	7.93545	-0.188663	0.0134629
Nab1	-0.447284	1	0.010836	29.0812	28.8379	21.5025	20.5988	24.0813	15.7136	38.4108	36.9539	33.1216	37.9139	38.0872	35.4524	26.4739	4.7265	20.1312	4.33136	36.1621	5.17641	37.1512	5.21534	-0.395133	0.0389284
Top2b	-0.419814	1	0.0108553	453.975	452.131	394.55	416.351	368.186	360.032	90.5793	78.7026	87.6414	102.229	94.8633	104.369	433.552	8.76006	381.523	8.57563	85.6411	6.42023	100.487	6.65086	-0.184436	0.230633
Vps13b	-0.400539	1	0.0109011	106.258	88.1077	74.6095	93.3327	71.2489	70.2796	18.6146	16.117	16.7553	22.1473	17.5902	19.4842	89.6585	6.48637	78.287	6.2907	17.1623	4.10117	19.7406	4.30309	-0.195667	0.201918
Ndnl2	-0.42331	1	0.0109091	54.1079	50.7199	59.168	40.2862	48.5607	37.4709	15.785	15.2508	14.2395	14.9575	16.2969	15.3156	54.6653	5.77255	42.1059	5.39595	15.0917	3.91569	15.5233	3.95637	-0.376601	0.0406801
Tufm	-0.456664	1	0.0109937	16.7776	19.7083	18.3277	11.1197	15.5235	13.8142	35.5487	36.1832	39.139	36.4112	36.8856	38.5001	18.2712	4.1915	13.4858	3.75337	36.957	5.20777	37.2656	5.21977	-0.438131	0.0119994
Dcaf5	-0.435019	1	0.0110052	20.273	20.8676	19.9151	15.4947	18.1107	14.8502	11.8821	10.34	11.0751	12.6688	10.9981	11.8533	20.3519	4.34709	16.1519	4.01363	11.0991	3.47237	11.8401	3.56561	-0.33346	0.0932388
Vps4b	-0.357549	1	0.0111282	70.8855	74.3408	69.2699	59.2444	62.492	55.2567	33.3263	31.0814	29.2311	32.2499	32.8686	33.6176	71.4987	6.15985	58.9977	5.88259	31.2129	4.96407	32.912	5.04054	-0.27726	0.0764722
Arrdc2	0.644276	1	0.0112161	4.89348	5.65164	5.77249	7.6562	9.75194	8.63385	16.327	13.191	12.8648	15.6973	14.2598	13.2044	5.4392	2.4434	8.68066	3.11781	14.1276	3.82045	14.3872	3.84671	0.67441	0.0262665
Anapc11	0.403355	1	0.0112465	109.055	109.7	124.83	133.801	132.945	137.106	44.7855	43.3311	46.142	41.4741	40.193	37.7324	114.528	6.83956	134.617	7.07272	44.7529	5.48391	39.7999	5.31469	0.23316	-0.169218
Stx11	0.417739	1	0.0113438	18.3156	14.6363	16.163	18.0467	20.1009	19.8579	16.6957	15.3736	15.1732	15.0269	13.3443	13.5269	16.3716	4.03313	19.3352	4.27316	15.7475	3.97705	13.966	3.80385	0.240031	-0.173202
Suz12	-0.442302	1	0.0113451	193.642	179.983	161.63	157.863	153.046	113.449	113.975	99.8737	96.6934	115.591	105.587	110.633	178.418	7.47912	141.453	7.14418	103.514	6.69368	110.604	6.78926	-0.334943	0.0955739
Hnrnpd	-0.392462	1	0.0114407	1144.65	1206.84	1062.57	1008.61	904.94	871.328	220.816	205.252	231.021	247.111	228.432	227.631	1138.02	10.1523	928.294	9.85844	219.03	7.77498	234.391	7.87277	-0.293876	0.0977908
Orc5	-0.243586	1	0.0114407	223.562	243.455	241.146	208.358	205.786	221.372	39.1264	39.1978	37.9459	39.3704	41.2001	43.3366	236.054	7.88298	211.839	7.72682	38.7567	5.27637	41.3024	5.36815	-0.156154	0.0917785
Phospho2	-0.434788	1	0.0114928	19.5739	25.3599	20.9253	15.677	17.1157	18.8218	12.5759	12.5294	13.6688	12.9462	14.0996	13.9491	21.953	4.45635	17.2048	4.10474	12.9247	3.69206	13.665	3.77241	-0.351609	0.0803488
Rab8a	0.272805	1	0.0114928	105.28	100.715	107.657	117.76	114.834	124.155	41.6416	41.053	47.387	42.0983	40.4562	39.6056	104.551	6.70806	118.916	6.8938	43.3605	5.43831	40.7201	5.34767	0.185743	-0.0906432
Atic	-0.210857	1	0.0115511	716.964	708.194	703.955	655.152	668.904	658.418	100.12	105.255	102.4	107.569	109.844	114.149	709.705	9.47107	660.824	9.36812	102.591	6.68077	110.521	6.78817	-0.102952	0.107408
Mipep	-0.349237	1	0.0116667	60.3995	63.3274	56.859	49.583	57.7156	49.3856	13.3023	14.8961	13.0982	14.3564	15.5187	15.6227	60.1953	5.91158	52.2281	5.70675	13.7656	3.78299	15.1659	3.92276	-0.204826	0.139772
Kat7	-0.247825	1	0.0118662	211.538	195.054	183.998	190.858	164.39	172.85	41.8367	38.1679	37.3234	42.6531	38.7968	42.9682	196.863	7.62105	176.033	7.4597	39.1094	5.28944	41.4727	5.37409	-0.161353	0.0846478
Kif14	-0.363425	1	0.0119196	61.3782	53.4732	55.8489	55.5986	49.9538	47.6589	12.0664	10.8584	12.0867	13.9403	11.9023	14.402	56.9001	5.83036	51.0704	5.67442	11.6705	3.54479	13.4149	3.74576	-0.155943	0.200969
Dcaf13	-0.233698	1	0.0119477	373.582	382.573	355.874	355.831	359.23	356.06	33.8141	33.6391	34.0035	35.6946	39.6437	39.1604	370.676	8.53402	357.04	8.47994	33.8189	5.07976	38.1662	5.25422	-0.0540733	0.174466
Agps	-0.329279	1	0.011967	110.732	107.816	103.183	88.5931	93.141	85.1298	34.367	32.6637	31.9804	34.4693	33.1661	35.3679	107.244	6.74475	88.9546	6.475	33.0037	5.04456	34.3344	5.10158	-0.269754	0.0570277
Lsm14a	-0.427492	1	0.0120337	153.096	172.013	162.784	133.254	131.353	107.75	68.4305	68.5331	68.9407	68.3606	70.0517	72.5323	162.631	7.34546	124.119	6.95558	68.6348	6.10087	70.3149	6.13576	-0.389877	0.0348894
Ypel5	0.357583	1	0.0121291	38.5885	49.1258	48.9219	48.6715	52.342	65.79	12.3158	13.3274	15.3547	11.8597	13.287	13.9184	45.5454	5.50923	55.6012	5.79704	13.666	3.77252	13.0217	3.70285	0.28781	-0.0696701
Dda1	0.501559	1	0.0122204	54.5273	44.6335	63.2088	70.5464	57.9146	73.7331	38.4976	39.7708	35.9228	34.1456	34.322	32.4353	54.1232	5.75818	67.398	6.07463	38.0637	5.25035	33.6343	5.07186	0.316459	-0.178483
Papd7	-0.638003	1	0.0123315	10.6258	9.56432	9.81324	5.83329	6.36861	5.69834	13.6818	13.0273	14.4469	14.5183	11.7878	11.9377	10.0011	3.32209	5.96675	2.57695	13.7187	3.77807	12.7479	3.67219	-0.745146	-0.105877
Ssrp1	-0.427616	1	0.0126444	589.734	531.689	491.383	476.325	442.619	379.717	132.926	134.904	134.458	137.276	143.811	153.525	537.602	9.07039	432.887	8.75785	134.096	7.06712	144.871	7.17862	-0.312549	0.111501
Bmpr1a	-0.485812	1	0.0129015	14.5406	13.3321	14.7199	13.6718	7.96077	8.97921	18.1267	14.9234	14.421	18.1247	14.832	15.0469	14.1975	3.82757	10.2039	3.35105	15.8237	3.98402	16.0012	4.00011	-0.476515	0.0160937
Uchl5	-0.248296	1	0.0129209	156.312	165.347	164.66	142.916	159.812	142.459	44.2218	46.4549	51.5629	49.2418	51.7291	52.8792	162.106	7.3408	148.396	7.2133	47.4132	5.56722	51.2833	5.68042	-0.127492	0.113201
Adam17	-0.363565	1	0.0129594	56.7643	57.0961	64.6519	49.583	50.7499	51.9758	11.2425	12.9523	14.7582	13.8478	13.5159	15.2542	59.5041	5.89492	50.7696	5.66589	12.9843	3.6987	14.206	3.82843	-0.229025	0.129729
Snrpg	0.781628	1	0.0129631	4.19441	8.11518	5.33956	6.56245	11.3441	13.9868	30.54	35.2215	37.4272	36.2956	38.0643	33.7481	5.88305	2.55656	10.6311	3.41022	34.3962	5.10418	36.036	5.17137	0.853659	0.0671893
Fasn	-0.378971	1	0.0129983	1358.15	1242.64	1151.76	1316.68	1035.5	966.474	215.612	173.249	175.205	232.662	197.852	211.67	1250.85	10.2887	1106.22	10.1114	188.022	7.55476	214.061	7.74188	-0.17727	0.187121
Gna13	-0.349797	1	0.013033	42.3635	39.2717	41.2733	34.0883	33.2362	33.3267	41.5765	37.6359	39.4762	45.4967	38.0186	40.619	40.9695	5.35648	33.5504	5.06826	39.5629	5.30608	41.3781	5.37079	-0.288221	0.064719
Plod3	-0.420005	1	0.0130338	58.8615	54.9224	63.3531	47.5778	46.9685	45.0687	11.1774	12.127	14.421	13.9865	12.0281	13.6804	59.0457	5.88376	46.5383	5.54035	12.5751	3.6525	13.2317	3.72593	-0.343411	0.0734241
Ruvbl1	-0.373328	1	0.0131177	40.9654	54.4876	44.1596	38.0987	37.4156	37.4709	17.9424	20.0934	20.6978	19.1419	21.7674	20.6972	46.5375	5.54032	37.6617	5.23503	19.5779	4.29115	20.5355	4.36005	-0.305295	0.0688961
Abcc4	-0.379727	1	0.0132204	128.489	135.929	135.076	113.02	112.844	106.887	30.204	28.3736	30.8392	34.9779	30.3393	31.5832	133.165	7.05707	110.917	6.79334	29.8056	4.89751	32.3001	5.01347	-0.263732	0.115958
Timm10b	0.570682	1	0.0132317	109.334	94.339	137.53	113.202	141.105	181.311	21.9971	27.4869	23.2915	18.4484	22.1107	21.9255	113.734	6.82952	145.206	7.18196	24.2585	4.60042	20.8282	4.38047	0.352434	-0.219952
Lap3	-0.237463	1	0.0132512	224.401	228.095	216.613	200.337	204.194	193.053	46.9755	47.0552	47.5686	48.5483	49.9895	50.1999	223.036	7.80113	199.195	7.63803	47.1997	5.56071	49.5792	5.63166	-0.163098	0.0709566
Usp16	-0.320653	1	0.0132547	60.9587	64.6316	60.6112	53.4111	53.3371	59.4009	30.3557	32.1317	31.8507	32.8741	35.7983	36.5809	62.0672	5.95576	55.383	5.79137	31.4461	4.97481	35.0845	5.13276	-0.164386	0.157953
Sord	-0.346837	1	0.0132821	88.7816	79.7027	74.1765	68.9058	64.6812	61.3004	67.7583	66.7734	67.3067	69.9789	66.8701	69.116	80.8869	6.33783	64.9625	6.02153	67.2795	6.07209	68.655	6.10129	-0.316301	0.0291981
Ybx3	-0.44505	1	0.0133382	394.973	418.367	430.195	307.888	340.92	256.253	367.261	328.206	317.133	378.792	336.273	284.425	414.512	8.69527	301.687	8.23691	337.533	8.39889	333.164	8.38009	-0.45836	-0.0187991
Rxrb	-0.325671	1	0.0134291	47.9561	49.5606	52.674	38.4633	38.8087	39.025	29.2716	28.2304	32.2657	27.8575	28.1992	30.731	50.0635	5.64569	38.7657	5.27671	29.9226	4.90316	28.9292	4.85446	-0.36898	-0.0487056
Timm17a	0.426592	1	0.0138365	124.574	112.018	106.791	148.02	130.756	157.654	56.5484	59.5232	54.2863	56.0617	55.7117	49.9542	114.461	6.83871	145.477	7.18464	56.7859	5.82746	53.9092	5.75246	0.345928	-0.0750018
Fiz1	-0.379951	1	0.0138888	28.6618	31.1565	32.4703	22.4217	25.6735	27.283	23.7859	23.0263	22.5652	25.3376	24.9604	23.7987	30.7628	4.94312	25.1261	4.65111	23.1258	4.53143	24.6989	4.62637	-0.292005	0.0949434
Hspe1	0.467184	1	0.013927	336.112	388.079	498.888	455.179	485.806	646.676	193.93	206.322	202.491	185.94	195.083	185.092	407.693	8.67134	529.22	9.04772	200.914	7.65044	188.705	7.55999	0.376385	-0.0904476
D8Ertd738e	0.524635	1	0.0139741	68.6485	58.98	86.876	79.2963	91.5488	110.686	67.2596	70.8453	67.3326	57.5182	68.747	61.3776	71.5015	6.1599	93.8437	6.55219	68.4792	6.09759	62.5476	5.96688	0.392287	-0.130712
Ndufv3	0.246507	1	0.0141478	148.202	155.638	162.351	152.942	180.311	172.332	29.586	33.3731	33.2254	27.9268	31.1633	28.7273	155.397	7.27982	168.528	7.39685	32.0615	5.00277	29.2725	4.87147	0.117031	-0.131296
Ipo5	-0.392873	1	0.0142535	754.993	786.883	652.869	686.141	637.259	602.47	154.89	138.717	148.879	175.051	163.587	170.706	731.582	9.51488	641.957	9.32633	147.495	7.20452	169.781	7.40754	-0.188542	0.20301
Ssh2	-0.388317	1	0.0142589	33.9747	38.2573	37.3769	30.9894	32.0421	30.5638	13.3023	11.7791	12.2423	13.8478	13.0467	14.8012	36.5363	5.19126	31.1984	4.9634	12.4412	3.63706	13.8986	3.79687	-0.227857	0.159808
Snx4	-0.35101	1	0.0142882	46.4181	52.3139	49.2105	38.4633	42.3911	41.4425	23.7859	22.7057	21.2165	24.5747	23.9762	23.0847	49.3142	5.62393	40.7656	5.34928	22.5694	4.49629	23.8785	4.57764	-0.27465	0.0813483
Git2	-0.3385	1	0.0143783	73.6818	71.8773	77.64	61.2496	67.0695	58.3648	20.6636	21.4575	22.1243	21.2919	22.1908	24.244	74.3997	6.21722	62.228	5.95949	21.4151	4.42056	22.5756	4.49669	-0.257734	0.0761308
Mprip	-0.461061	1	0.0143783	36.9108	35.5039	37.0883	32.8123	24.6784	19.8579	42.9317	40.9985	42.4849	41.7053	38.1445	42.3693	36.501	5.18986	25.7828	4.68834	42.1384	5.39706	40.7397	5.34836	-0.501524	-0.0486988
Pgm1	-0.338829	1	0.014408	99.4075	101.295	106.935	84.9473	91.9469	93.591	17.151	16.1989	20.4643	19.1419	18.8491	21.3881	102.546	6.68013	90.1617	6.49444	17.9381	4.16495	19.793	4.30692	-0.185683	0.141968
Deb1	0.602755	1	0.0144386	10.3462	12.1728	12.2665	13.4895	21.096	17.4404	13.7793	13.9685	16.2885	15.1424	14.7977	13.1584	11.5952	3.53545	17.342	4.1162	14.6788	3.87566	14.3662	3.8446	0.580743	-0.0310563
Polr2e	0.460978	1	0.0145089	132.264	131.582	186.74	165.155	178.719	201.514	41.1971	48.0782	50.9923	42.0289	41.1887	40.1814	150.195	7.23069	181.796	7.50618	46.7559	5.54708	41.133	5.36222	0.275483	-0.18485
Sos2	-0.390704	1	0.0145658	31.0386	30.7218	26.9864	24.0623	25.2754	20.8939	20.3167	19.35	19.1675	20.0204	19.6158	20.9889	29.5823	4.88666	23.4106	4.54909	19.6114	4.29362	20.2084	4.33688	-0.337572	0.043263
Fubp1	-0.242866	1	0.0145964	152.956	200.416	203.336	148.202	189.466	175.44	30.5942	40.9576	43.4705	35.1166	43.5463	46.346	185.569	7.53581	171.036	7.41816	38.3408	5.26081	41.6696	5.38092	-0.117658	0.120117
Kctd3	-0.53687	1	0.0148311	11.7443	10.5787	9.23599	9.11452	9.55292	6.0437	10.657	10.1558	10.2711	12.2527	11.124	11.4771	10.5197	3.39502	8.23705	3.04213	10.3613	3.37314	11.6179	3.53828	-0.352892	0.165147
Cct4	-0.374891	1	0.0148691	1020.78	1040.34	903.684	878.64	861.156	851.298	135.733	130.634	140.838	153.135	153.722	154.653	988.267	9.94876	863.698	9.75438	135.735	7.08465	153.837	7.26526	-0.194373	0.180604
Ssx2ip	-0.305649	1	0.0149054	79.5539	67.5299	69.4142	59.7912	58.9097	53.5299	76.2254	66.4597	67.177	76.1977	64.1921	66.0452	72.166	6.17325	57.4103	5.84324	69.954	6.12834	68.8117	6.10458	-0.330011	-0.0237541
Ncoa6	-0.506991	1	0.0149514	50.1931	45.7928	44.5925	42.8382	40.998	26.2469	24.7074	20.7073	21.6834	26.3317	22.2252	25.1959	46.8595	5.55027	36.6944	5.19749	22.366	4.48324	24.5843	4.61966	-0.352782	0.136426
Serf1	0.593335	1	0.0150412	9.92676	11.738	10.1019	15.3124	14.5284	17.095	10.4836	10.4218	11.4382	12.3914	10.2543	9.29684	10.5889	3.40448	15.6453	3.96766	10.7812	3.43045	10.6475	3.41244	0.563176	-0.0180068
Ttf2	-0.366815	1	0.0150816	68.0892	64.9214	62.4872	55.4163	55.3273	54.7386	16.1536	15.5987	16.1069	16.3677	16.4228	19.2769	65.166	6.02605	55.1607	5.78557	15.9531	3.99576	17.3558	4.11735	-0.240477	0.121587
Pikfyve	-0.357663	1	0.0152048	85.4261	85.4992	79.0831	73.463	76.8214	69.0708	15.3947	15.5987	16.6516	17.6161	16.7547	18.9084	83.3362	6.38087	73.1184	6.19216	15.8816	3.98929	17.7598	4.15054	-0.188708	0.161251
Usp1	-0.422449	1	0.0152534	84.1678	73.4714	81.9694	63.4371	68.8606	54.9113	97.1383	80.0804	82.9727	96.4493	86.0053	89.1453	79.8695	6.31957	62.403	5.96354	86.7305	6.43847	90.5333	6.50038	-0.356029	0.0619093
Bicd2	-0.530399	1	0.0153775	12.1638	12.1728	11.2564	8.93223	7.36371	8.11582	12.847	13.0205	12.9685	13.9172	12.3028	12.5135	11.8643	3.56856	8.13725	3.02454	12.9453	3.69436	12.9112	3.69055	-0.544014	-0.00381249
Mrps21	0.561764	1	0.0154093	35.3728	41.4454	56.859	50.3121	62.691	63.1998	31.7868	33.8369	35.5078	31.5333	31.2778	27.5911	44.5591	5.47765	58.7343	5.87613	33.7105	5.07513	30.1341	4.91332	0.398484	-0.161803
Thg1l	0.364962	1	0.0154206	24.3276	26.0845	30.8828	32.8123	32.4401	35.5715	11.3184	13.0478	13.5391	11.929	11.9595	12.8666	27.0983	4.76013	33.608	5.07073	12.6351	3.65936	12.2517	3.61491	0.3106	-0.0444522
Bend3	0.449139	1	0.0156322	19.9933	17.5346	15.1528	22.7863	24.8774	22.6207	22.7993	18.9612	16.5738	20.3903	18.1166	18.3557	17.5602	4.13424	23.4281	4.55017	19.4448	4.28131	18.9542	4.24445	0.415929	-0.0368647
Uba2	-0.204491	1	0.015666	713.888	680.226	652.147	658.433	613.377	583.648	121.998	109.191	112.022	124.838	114.674	118.387	682.087	9.41381	618.486	9.2726	114.403	6.83799	119.3	6.89845	-0.141215	0.0604602
2810417H13Rik	0.548384	1	0.0156836	16.7776	14.2016	15.5857	23.88	17.7127	21.412	27.5804	28.3395	24.1474	22.7021	24.5942	26.9232	15.5216	3.95621	21.0016	4.39243	26.6891	4.73818	24.7398	4.62876	0.436216	-0.109414
Polb	-0.332642	1	0.0157091	45.02	52.7487	55.9932	37.9164	43.5852	45.4141	12.2507	12.9318	13.3835	12.4607	14.1454	13.6036	51.2539	5.67959	42.3052	5.40276	12.8553	3.6843	13.4032	3.74451	-0.276827	0.060214
Dhx15	-0.202856	1	0.0157679	820.146	821.952	712.758	803.354	767.816	769.794	120.924	113.522	117.573	137.322	132.745	132.513	784.952	9.61646	780.321	9.60792	117.34	6.87455	134.193	7.06817	-0.00853647	0.193622
Cd59a	0.422791	1	0.0158841	27.1238	49.2707	48.7776	29.8956	59.9048	59.7463	19.4168	28.9261	26.4299	15.836	25.4296	26.0634	41.724	5.38281	49.8489	5.63949	24.9243	4.63948	22.443	4.48819	0.256682	-0.151284
Htatsf1	-0.393462	1	0.016056	132.823	127.09	105.204	105.546	117.222	91.8642	32.0036	29.6763	30.2426	36.573	33.7841	33.4947	121.705	6.92725	104.878	6.71256	30.6409	4.93738	34.6173	5.11342	-0.214687	0.176037
Mogs	-0.414518	1	0.0161786	118.702	123.756	139.406	101.9	88.5635	85.9932	39.56	43.4607	43.3408	38.1913	39.3805	44.8106	127.288	6.99195	92.1523	6.52595	42.1205	5.39645	40.7941	5.35029	-0.466003	-0.0461615
Prcp	-0.426821	1	0.0161959	112.83	124.916	110.399	109.01	85.1802	84.7844	11.1991	11.5882	11.7754	12.0908	12.1426	12.7822	116.048	6.85858	92.9914	6.53903	11.5209	3.52618	12.3385	3.6251	-0.319553	0.0989194
Taf2	-0.340661	1	0.0161963	52.5699	52.7487	64.7962	45.3903	46.5705	45.4141	21.9862	20.8232	23.3174	23.2801	20.932	23.5914	56.7049	5.8254	45.7916	5.51701	22.0423	4.4622	22.6011	4.49832	-0.308391	0.0361217
Nln	-0.326987	1	0.0163194	79.6937	72.1671	71.4346	70.1818	67.0695	61.1277	10.0824	10.0467	10.323	11.7441	10.8265	11.2007	74.4318	6.21785	66.1263	6.04715	10.1507	3.34351	11.2571	3.49276	-0.170695	0.149255
Clip1	-0.374342	1	0.0164761	57.4634	52.6038	54.1171	52.8642	50.1528	39.025	23.8293	21.7167	19.9975	26.9559	22.3167	23.9599	54.7281	5.77421	47.3474	5.56521	21.8478	4.44942	24.4108	4.60945	-0.208998	0.160033
Wnk1	-0.492747	1	0.0166135	82.3502	88.1077	74.6095	69.9995	63.6861	52.4938	30.746	29.0966	31.747	30.7241	30.1333	36.5732	81.6891	6.35207	62.0598	5.95559	30.5299	4.93215	32.4769	5.02134	-0.396484	0.0891926
Tmem242	0.600321	1	0.0167425	12.8628	13.7668	23.5229	20.7811	27.4646	25.9016	20.295	22.5488	20.8015	19.8586	21.3897	21.4111	16.7175	4.06329	24.7158	4.62736	21.2151	4.40702	20.8865	4.3845	0.564071	-0.0225226
Tkt	-0.192873	1	0.016948	983.169	1021.64	1102.26	909.264	947.331	899.993	226.4	232.254	238.829	235.066	232.872	239.776	1035.69	10.0164	918.863	9.84371	232.494	7.86105	235.905	7.88206	-0.172671	0.0210101
Klc1	-0.375861	1	0.0169705	68.5087	64.9214	66.3837	52.135	57.3175	49.731	20.3709	22.9512	24.0955	21.1301	22.9576	25.1729	66.6046	6.05755	53.0612	5.72959	22.4725	4.49009	23.0869	4.529	-0.327964	0.0389081
Cpsf2	-0.383968	1	0.0170263	611.545	598.06	579.847	542.678	502.722	480.215	83.0988	80.2645	84.1139	89.8375	86.8865	98.327	596.484	9.22034	508.539	8.99021	82.4924	6.36619	91.6836	6.51859	-0.230125	0.152403
Gskip	0.390231	1	0.0170303	29.5007	31.5912	41.2733	36.6404	41.197	43.5146	12.4784	14.8961	13.5651	11.3511	13.0467	13.0125	34.1217	5.09262	40.4507	5.33809	13.6465	3.77046	12.4701	3.6404	0.245472	-0.130063
Tmem9b	0.435581	1	0.01716	25.0266	20.8676	24.3888	31.3539	29.0568	27.283	27.3418	30.0446	26.2224	23.465	26.9975	26.5163	23.4277	4.55014	29.2312	4.86944	27.8696	4.80062	25.6596	4.68143	0.319297	-0.119193
Taf5	-0.312219	1	0.0173289	81.2317	71.8773	76.0526	61.7964	63.4871	60.7823	17.216	15.1894	15.0954	16.6914	15.7018	15.4922	76.3872	6.25526	62.022	5.95471	15.8336	3.98492	15.9618	3.99655	-0.300552	0.0116322
Rprd2	-0.403421	1	0.0175463	85.7057	73.3264	59.7453	71.4578	59.1087	55.4293	16.197	14.4187	15.0694	17.5005	16.5373	16.9585	72.9258	6.18836	61.9986	5.95416	15.2284	3.92869	16.9988	4.08736	-0.234194	0.158668
Mapkap1	-0.449808	1	0.0175674	35.233	28.1133	40.6961	26.2498	24.4794	21.0666	27.0925	27.4665	26.9486	25.8231	24.6056	26.5471	34.6808	5.11607	23.9319	4.58086	27.1692	4.7639	25.6586	4.68137	-0.535201	-0.0825298
Sh3bgrl	0.40272	1	0.0176618	83.8881	97.0923	90.7724	114.843	112.446	132.961	86.6439	81.881	83.8286	82.0697	84.7807	86.4583	90.5843	6.50119	120.083	6.90789	84.1178	6.39434	84.4363	6.39979	0.406703	0.00545076
4930523C07Rik	0.413251	1	0.0176633	16.498	17.5346	19.7708	18.229	21.4941	25.0382	23.6558	25.4953	24.2771	20.2285	22.7059	23.8755	17.9345	4.16466	21.5871	4.4321	24.4761	4.6133	22.2699	4.47702	0.267435	-0.136275
Pex13	-0.426908	1	0.0177086	24.4674	25.0701	24.1002	17.8645	25.6735	18.8218	10.3752	10.2104	11.7754	11.7209	12.1884	12.36	24.5459	4.61741	20.7866	4.37758	10.787	3.43122	12.0898	3.59571	-0.239829	0.164493
Rasa1	-0.46079	1	0.0179711	50.8921	42.7496	46.7572	33.1768	40.7989	29.3551	12.4567	12.3657	14.2913	13.3161	12.4516	13.5192	46.7996	5.54843	34.4436	5.10617	13.0379	3.70464	13.0956	3.71101	-0.44226	0.00637322
Rpl12	0.847837	1	0.0180159	3.35553	2.46354	2.45331	5.83329	4.1794	5.87102	228.546	261.194	279.731	276.055	292.361	254.531	2.75746	1.46334	5.29457	2.40451	256.49	8.00276	274.315	8.09969	0.941175	0.0969308
Psmc5	-0.208386	1	0.0180386	635.593	580.96	611.596	566.741	547.9	518.031	72.0298	70.9817	74.9841	76.8912	76.3232	71.4037	609.383	9.2512	544.224	9.08806	72.6652	6.18319	74.8727	6.22637	-0.163148	0.043176
Vdac1	-0.372544	1	0.0181783	682.57	717.324	721.85	566.194	592.082	520.967	114.658	113.433	119.751	119.082	117.043	120.122	707.248	9.46607	559.748	9.12863	115.947	6.85733	118.749	6.89177	-0.33744	0.034443
Golt1b	0.325748	1	0.0185703	82.0706	90.1365	81.1035	94.791	108.664	109.65	31.7434	31.9476	32.4991	31.9032	30.9115	32.0591	84.4369	6.3998	104.368	6.70554	32.0634	5.00285	31.6246	4.98298	0.305741	-0.0198787
Rps29	-7.44129	1	0.0187992	0.139814	0.434742	0.288625	0	0	0	20.9671	35.8694	56.7244	49.7967	64.8902	50.2767	0.287727	-1.79723	0	#NUM!	37.8536	5.24236	54.9878	5.78104	#NUM!	0.538681
Creb1	-0.376689	1	0.0188061	23.2091	26.5192	30.5942	20.0519	22.4892	22.448	17.5846	20.3321	21.6834	19.0263	19.8676	23.9292	26.7742	4.74277	21.663	4.43716	19.8667	4.31228	20.941	4.38826	-0.305606	0.0759793
P4hb	-0.366604	1	0.0188381	862.51	930.637	964.872	730.62	731.396	743.72	97.8972	110.527	110.855	96.7498	113.197	120.352	919.34	9.84445	735.245	9.52208	106.427	6.73371	110.1	6.78267	-0.322373	0.0489538
Slc20a1	-0.381074	1	0.0189342	106.538	113.033	87.1646	86.7702	77.4185	64.7539	47.0622	37.1039	34.7557	46.0284	36.382	32.9266	102.245	6.67589	76.3142	6.25388	39.6406	5.30891	38.4457	5.26475	-0.422009	-0.0441575
Arid2	-0.316768	1	0.018936	112.969	100.136	97.4108	94.9733	83.389	85.4751	36.0691	28.4486	31.1764	36.2956	30.2821	34.3239	103.505	6.69356	87.9458	6.45854	31.898	4.9954	33.6339	5.07184	-0.235017	0.076447
Qrich1	-0.412109	1	0.0190509	276.411	246.209	219.499	245.363	209.567	173.195	45.4035	39.723	42.044	50.9295	44.3359	47.1982	247.373	7.95054	209.375	7.70995	42.3902	5.40566	47.4879	5.56949	-0.240599	0.163829
Chaf1a	-0.235975	1	0.0190561	167.497	170.564	172.598	165.52	139.114	153.51	46.9755	44.9203	50.9145	49.3574	48.2728	52.7179	170.219	7.41125	152.715	7.25469	47.6034	5.57299	50.1161	5.6472	-0.156556	0.0742077
Brcc3	-0.361856	1	0.0191033	60.5393	72.7468	67.3938	54.3225	51.1479	62.1637	18.4628	17.9654	17.8188	19.5811	19.0436	19.9372	66.8933	6.06379	55.8781	5.80421	18.0823	4.17651	19.5206	4.28693	-0.25958	0.110421
Commd4	0.419445	1	0.0192853	206.505	176.505	215.603	224.946	228.275	253.145	37.5435	39.1637	34.5741	33.8451	33.2806	31.4219	199.537	7.64052	235.455	7.87931	37.0938	5.21311	32.8492	5.03779	0.238794	-0.17532
Cox10	-0.461913	1	0.0193994	34.1145	31.4463	32.6146	26.4321	27.4646	15.3683	27.4719	23.4355	21.424	24.3435	23.1865	21.4802	32.7251	5.03233	23.0883	4.52909	24.1105	4.59159	23.0034	4.52378	-0.503235	-0.0678123
Mdm4	-0.586717	1	0.0195374	10.3462	10.5787	7.35993	7.6562	6.1696	7.25244	28.6211	23.1218	23.7324	28.8053	26.4825	28.95	9.42828	3.237	7.02608	2.81272	25.1584	4.65297	28.0793	4.81143	-0.424276	0.158463
Exoc5	-0.251882	1	0.0195515	116.185	113.613	120.212	114.843	105.281	95.3177	44.0483	41.1963	40.9806	47.8779	42.4132	45.064	116.67	6.86629	105.147	6.71627	42.0751	5.39489	45.1184	5.49564	-0.150021	0.100749
Trp53	0.399937	1	0.0195808	38.7284	32.3158	41.9949	43.5674	46.1725	51.1124	36.0149	41.3327	39.3206	32.9666	36.9542	40.5422	37.6797	5.23571	46.9508	5.55308	38.8894	5.2813	36.821	5.20246	0.317362	-0.0788474
Eef2k	0.399308	1	0.0196433	103.043	117.09	133.2	121.223	148.667	165.425	71.3468	71.3228	83.5433	69.4703	66.3093	74.9275	117.778	6.87992	145.105	7.18095	75.4043	6.23657	70.2357	6.13413	0.30103	-0.102442
Ganab	-0.390725	1	0.01965	726.891	656.46	717.954	664.084	536.556	570.525	70.2518	71.1113	71.0935	74.8568	74.1717	85.8135	700.435	9.45211	590.388	9.20552	70.8189	6.14606	78.2807	6.29058	-0.246587	0.144522
Rwdd1	0.479887	1	0.0196553	38.4487	34.0548	40.2631	41.7445	53.3371	64.5812	25.4446	26.4366	26.0408	26.5629	27.0548	25.3571	37.5889	5.23223	53.221	5.73392	25.974	4.699	26.3249	4.71836	0.501688	0.0193608
Sptb	-0.40669	1	0.0196739	1149.13	1370.31	1324.07	1190.54	1027.93	941.781	165.591	174.266	171.366	176.277	181.338	200.354	1281.17	10.3232	1053.42	10.0409	170.407	7.41284	185.99	7.53908	-0.28238	0.126233
Foxred2	-0.463482	1	0.0202225	52.9893	44.4886	43.7266	43.2028	31.8431	31.4272	12.5001	12.3316	9.64859	12.5532	10.8951	12.3293	47.0682	5.55668	35.491	5.14938	11.4934	3.52274	11.9259	3.57602	-0.407297	0.0532867
Fyttd1	-0.381542	1	0.0202797	96.3316	100.715	94.5246	78.0203	91.9469	71.143	30.4641	28.2031	29.3089	33.6139	29.6298	31.2454	97.1904	6.60274	80.37	6.32859	29.3254	4.87408	31.4964	4.97711	-0.274157	0.103035
Fubp3	-0.368017	1	0.0202814	58.0226	60.2842	59.7453	50.3121	55.9244	43.5146	22.1597	20.3049	22.2281	24.5516	22.3282	22.9926	59.3507	5.89119	49.9171	5.64146	21.5642	4.43057	23.2908	4.54169	-0.249732	0.111121
Eef2	-0.345416	1	0.0203058	3956.86	3785.01	3437.09	3451.12	3376.96	2698.94	1182.92	1162.58	1189.58	1262.67	1267.83	1289.11	3726.32	11.8635	3175.67	11.6328	1178.36	10.2026	1273.21	10.3142	-0.230688	0.111686
Cdc42bpa	-0.412727	1	0.0203376	18.3156	19.9981	18.1834	16.0416	11.9412	14.8502	19.5469	18.8111	21.2684	19.9048	18.4828	21.8718	18.8324	4.23514	14.2776	3.83569	19.8755	4.31292	20.0865	4.32815	-0.399455	0.0152335
Usp8	-0.346167	1	0.0204847	101.505	114.482	109.533	92.6035	87.7675	89.9648	31.7109	27.8893	30.5279	31.9725	29.5611	33.4947	108.507	6.76164	90.1119	6.49365	30.0427	4.90894	31.6761	4.98532	-0.267993	0.07638
Ier2	0.369623	1	0.020703	28.3822	27.6786	28.1409	40.4685	49.9538	50.7671	25.6506	25.0315	24.4327	30.9091	34.2877	32.3432	28.0672	4.81081	47.0631	5.55652	25.0383	4.64606	32.5133	5.02296	0.745711	0.376895
Sgol1	-0.504595	1	0.0207688	29.5007	29.7074	23.09	24.0623	23.4843	21.412	17.9316	16.9287	16.911	19.0725	19.0322	23.1615	27.4327	4.77782	22.9862	4.5227	17.2571	4.10912	20.4221	4.35206	-0.255128	0.242942
Kif5b	-0.409287	1	0.0207954	219.787	223.023	191.502	186.483	163.992	146.43	62.381	52.5184	56.5169	65.3784	52.5759	59.681	211.437	7.72409	165.635	7.37186	57.1388	5.8364	59.2118	5.88781	-0.352222	0.0514136
Strbp	-0.392206	1	0.0207972	53.6884	53.1834	42.7164	45.9372	41.396	34.3627	27.1684	23.3127	25.0552	28.4123	25.0863	26.5778	49.8628	5.63989	40.5653	5.34217	25.1788	4.65414	26.6921	4.73834	-0.297716	0.0842063
Skp2	-0.327627	1	0.0208397	83.4687	89.4119	92.6485	70.3641	64.0842	72.697	15.6657	18.0404	17.8188	16.7376	16.6403	17.2732	88.5097	6.46776	69.0484	6.10954	17.175	4.10224	16.8837	4.07756	-0.358227	-0.024676
Zfp148	-0.423064	1	0.0209432	58.0226	73.6163	58.1579	46.6663	52.7401	48.5223	23.6992	22.617	24.2252	24.0892	23.2094	26.3398	63.2656	5.98335	49.3096	5.6238	23.5138	4.55544	24.5461	4.61742	-0.359554	0.0619877
Ska2	0.438346	1	0.0210245	13.7017	16.3753	15.0085	15.8593	19.3049	18.6491	12.7819	11.8951	13.3576	11.4898	11.0783	10.8476	15.0285	3.90963	17.9377	4.16493	12.6782	3.66428	11.1385	3.47749	0.255298	-0.18679
Mcm4	-0.209947	1	0.0210622	499.834	458.942	427.453	490.908	441.226	428.239	69.0268	60.9896	62.0415	74.6488	67.9917	74.6127	462.076	8.85199	453.458	8.82482	64.0193	6.00043	72.4177	6.17827	-0.0271637	0.177837
Dnajc21	-0.435264	1	0.0211824	30.6192	29.7074	28.2852	29.531	26.2705	17.4404	20.1649	20.0252	20.179	22.2166	22.6486	21.8641	29.5372	4.88446	24.414	4.60964	20.123	4.33078	22.2431	4.47529	-0.274827	0.14451
Itgb1	-0.370189	1	0.0212691	572.397	603.567	520.102	494.554	480.432	450.342	97.2251	89.5951	87.8488	104.61	94.7489	98.7722	565.355	9.14301	475.109	8.89212	91.5563	6.51659	99.377	6.63484	-0.250897	0.118253
Alas2	0.216728	1	0.0213067	201.891	261.425	246.052	216.926	296.738	275.42	100.944	136.95	138.089	102.321	129.174	125.933	236.456	7.88543	263.028	8.03907	125.328	6.96956	119.143	6.89655	0.153643	-0.073012
Arhgap21	-0.404656	1	0.0213067	41.5246	40.7208	30.7385	38.281	29.8529	25.2109	26.5613	21.4644	22.4615	27.9037	24.3424	24.0904	37.6613	5.23501	31.1149	4.95953	23.4957	4.55433	25.4455	4.66934	-0.275478	0.115014
Gmds	-0.314632	1	0.0215172	48.6551	49.8504	48.4889	38.0987	36.6195	43.3419	11.6111	11.9224	11.5939	11.536	12.0281	11.7305	48.9982	5.61466	39.3534	5.29842	11.7091	3.54956	11.7649	3.55641	-0.316239	0.00685464
Herpud2	-0.404401	1	0.0215274	20.5526	25.215	20.781	16.7707	16.3196	14.5049	15.8283	15.51	15.2769	15.4661	14.0309	14.64	22.1829	4.47137	15.8651	3.98778	15.5384	3.95777	14.7124	3.87896	-0.483593	-0.0788118
1110008P14Rik	0.527666	1	0.0216375	13.2823	9.70923	16.4516	15.4947	16.1206	15.3683	15.6983	16.7172	14.6804	13.4086	13.5846	12.0606	13.1477	3.71674	15.6612	3.96912	15.6986	3.97257	13.0179	3.70243	0.25238	-0.27014
Sppl2a	-0.221429	1	0.0217061	299.061	293.161	287.614	263.227	247.779	247.446	41.9126	42.1239	41.1621	41.4972	40.3761	43.874	293.279	8.19613	252.817	7.98195	41.7329	5.38311	41.9158	5.38942	-0.214177	0.00631016
Vps13a	-0.406529	1	0.0217856	162.324	160.71	133.056	166.978	134.537	148.502	17.9532	15.1621	15.5363	22.6328	18.8376	21.9025	152.03	7.24821	150.006	7.22887	16.2172	4.01946	21.1243	4.40083	-0.0193353	0.381375
Piezo1	-0.333757	1	0.0218559	75.0799	79.9925	75.1867	65.8068	62.492	57.5015	57.1989	50.9088	54.1307	57.102	51.6032	55.8502	76.753	6.26215	61.9334	5.95265	54.0794	5.75701	54.8518	5.77747	-0.309505	0.0204585
Gpsm2	-0.314098	1	0.0219494	88.502	90.861	95.2461	73.8276	74.0351	71.143	28.5561	31.2792	28.9976	27.4413	29.5954	31.1302	91.5364	6.51627	73.0019	6.18986	29.611	4.88806	29.389	4.8772	-0.326411	-0.010855
Gtf2f2	-0.230318	1	0.0221124	201.192	206.213	194.244	180.467	183.496	180.102	29.9329	31.2041	30.2426	30.8166	35.2604	30.754	200.55	7.64781	181.355	7.50267	30.4599	4.92884	32.277	5.01244	-0.145141	0.0835972
Fopnl	0.364163	1	0.0224934	91.7177	80.5721	86.7317	108.098	93.539	112.24	21.2815	19.1999	16.9888	19.35	17.9678	17.1043	86.3405	6.43197	104.626	6.70909	19.1567	4.25978	18.1407	4.18116	0.277129	-0.0786211
Higd1a	0.761137	1	0.0225238	3.49534	2.89828	3.4635	5.28642	4.57744	5.87102	28.7512	31.5656	33.2254	30.0768	31.1633	27.1842	3.2857	1.7162	5.24496	2.39093	31.1807	4.96258	29.4748	4.88141	0.674729	-0.0811733
Znrf1	-0.812023	1	0.0227087	5.1731	2.89828	6.78268	1.64061	3.18431	2.93551	18.2676	17.5834	20.3347	18.3559	15.9193	17.0967	4.95135	2.30782	2.58681	1.37117	18.7286	4.22717	17.1239	4.09794	-0.936649	-0.129227
Fam114a2	0.335622	1	0.0227703	28.1025	30.5768	32.7589	34.0883	44.1823	38.3343	17.357	19.8342	19.2194	18.4021	18.9521	19.6147	30.4794	4.92976	38.8683	5.28052	18.8035	4.23293	18.9896	4.24714	0.350758	0.014209
Limd1	-0.37634	1	0.0229112	72.004	64.4867	62.7759	54.8694	60.8999	42.6512	35.668	34.478	33.0957	35.787	34.7111	35.2221	66.4222	6.05359	52.8068	5.72265	34.4139	5.10492	35.2401	5.13914	-0.33094	0.0342253
Nrde2	0.34947	1	0.0229112	47.9561	41.0106	36.2224	58.3329	48.5607	44.5507	16.0994	12.9523	13.4354	14.079	12.3829	13.3964	41.7297	5.383	50.4814	5.65768	14.1624	3.82399	13.2861	3.73185	0.274678	-0.0921434
Stam	-0.351469	1	0.0229839	55.9254	58.5452	57.5806	46.8486	49.3568	49.213	14.4949	13.7162	14.1098	13.8709	14.7748	16.9278	57.3504	5.84173	48.4728	5.5991	14.1069	3.81833	15.1912	3.92516	-0.242629	0.106829
Csrp2bp	-0.388367	1	0.0232257	35.5126	35.0692	34.635	30.8071	30.0519	21.2393	29.6727	26.7162	28.1936	31.5564	26.7	27.5911	35.0723	5.13226	27.3661	4.77432	28.1942	4.81733	28.6158	4.83874	-0.357941	0.0214165
Ipmk	-0.395059	1	0.0232772	19.1545	21.0125	20.2037	14.4009	15.5235	14.8502	30.952	28.4418	29.9054	30.1231	27.1692	29.7637	20.1236	4.33081	14.9249	3.89965	29.7664	4.89561	29.0187	4.85891	-0.431166	-0.0367047
Eri3	0.298331	1	0.0232891	46.4181	55.502	55.5602	51.7705	58.1136	58.3648	28.3501	30.8358	29.4904	24.0892	27.0548	26.1786	52.4935	5.71407	56.083	5.80949	29.5588	4.88552	25.7742	4.68785	0.0954251	-0.197661
Nufip2	-0.355834	1	0.0234361	121.638	109.41	96.5449	97.5254	91.5488	82.7123	24.0136	23.4764	24.2512	26.6091	23.5413	25.8792	109.198	6.7708	90.5955	6.50137	23.9137	4.57977	25.3432	4.66353	-0.26943	0.0837596
Tbl1xr1	-0.390004	1	0.0234981	41.1052	36.5183	33.1918	32.2654	25.6735	29.7005	19.6445	18.9339	22.1762	20.8758	20.2682	21.4342	36.9384	5.20705	29.2131	4.86854	20.2515	4.33996	20.8594	4.38262	-0.338507	0.0426644
Atp5a1	-0.31349	1	0.0234993	4528.84	4549.14	4102.51	4124.87	3677.08	3374.97	540.245	510.356	520.038	575.875	555.229	522.627	4393.5	12.1012	3725.64	11.8633	523.547	9.03217	551.244	9.10655	-0.237881	0.0743722
Nol12	0.442204	1	0.0235162	41.245	43.6191	45.0254	55.4163	51.347	45.7594	38.129	38.3385	30.1389	27.7188	33.5094	30.5161	43.2965	5.43618	50.8409	5.66792	35.5354	5.15119	30.5814	4.93458	0.231738	-0.216603
Atp7b	-0.22458	1	0.023565	222.583	207.227	214.448	203.801	197.228	194.089	35.8306	32.7865	34.3147	40.0408	34.8484	36.3583	214.753	7.74653	198.373	7.63207	34.3106	5.10058	37.0825	5.21267	-0.114464	0.112083
Mmab	0.575056	1	0.023565	5.45273	5.65164	10.1019	6.92703	10.548	11.742	9.60542	12.7136	12.9167	9.82525	10.8837	12.0913	7.06874	2.82145	9.73903	3.28378	11.7452	3.554	10.9334	3.45067	0.462324	-0.10333
Elmo1	-0.303148	1	0.0235813	63.8948	67.9646	76.7741	52.6819	60.3028	69.2435	12.1857	14.0436	15.0435	12.507	14.7748	17.2579	69.5445	6.11987	60.7427	5.92464	13.7576	3.78215	14.8466	3.89206	-0.195225	0.109903
Plaa	-0.383701	1	0.0236655	277.81	278.38	255.866	219.478	246.585	212.911	56.9495	55.9014	56.5687	62.9278	58.0235	63.6423	270.685	8.08047	226.324	7.82225	56.4732	5.8195	61.5312	5.94325	-0.258223	0.123751
Trim11	0.458579	1	0.023731	12.8628	11.1584	10.5348	15.1301	19.1058	13.4688	11.6761	10.8993	11.0751	10.75	11.227	11.2929	11.5187	3.5259	15.9016	3.9911	11.2168	3.48759	11.09	3.47118	0.465196	-0.0164124
Osbpl1a	-0.222966	1	0.0237452	241.877	281.568	265.535	218.566	219.319	250.727	36.2751	40.6029	41.2918	36.1107	40.6165	43.7819	262.993	8.03888	229.537	7.84259	39.3899	5.29976	40.1697	5.32804	-0.196296	0.0282802
Ptpn11	-0.436467	1	0.0237452	81.0919	70.4282	68.837	66.7183	55.9244	44.5507	49.2413	48.0578	49.3064	49.8429	46.9453	52.9252	73.4523	6.19874	55.7311	5.80041	48.8685	5.61083	49.9045	5.6411	-0.398325	0.0302643
Tspan14	0.317364	1	0.0239003	87.9427	86.2238	76.4855	96.7962	98.1165	98.0806	37.5652	33.9733	32.9401	36.573	32.0102	29.9173	83.5507	6.38458	97.6644	6.60976	34.8262	5.1221	32.8335	5.0371	0.225181	-0.085004
Wiz	-0.407135	1	0.0239003	39.5672	36.2285	34.4906	32.63	29.0568	24.5201	26.9299	24.2949	22.3578	24.7134	24.5141	26.4319	36.7621	5.20015	28.7356	4.84477	24.5275	4.61633	25.2198	4.65648	-0.355379	0.0401558
Ccnd2	-0.374355	1	0.0239322	115.486	117.38	115.161	100.624	87.3694	75.8052	31.635	30.563	30.1129	30.7704	27.8215	31.7367	116.009	6.8581	87.933	6.45833	30.7703	4.94347	30.1095	4.91215	-0.399763	-0.0313187
Cct8	-0.172261	1	0.0240737	2071.62	2092.7	1973.04	1996.44	2006.11	1975.43	269.136	266.562	280.587	294.226	300.257	300.831	2045.79	10.9984	1992.66	10.9605	272.095	8.08797	298.438	8.22129	-0.0379588	0.133321
Usp6nl	-0.389971	1	0.0240737	42.783	45.0682	36.944	33.5414	36.4205	27.6283	35.9932	31.1769	29.5942	37.5671	30.4194	30.8769	41.5984	5.37846	32.5301	5.0237	32.2548	5.01144	32.9545	5.0424	-0.354752	0.0309627
Anapc5	-0.381844	1	0.0242332	177.563	181.432	179.092	139.999	137.721	114.485	171.391	171.974	171.677	163.192	163.359	161.539	179.362	7.48673	130.735	7.0305	171.681	7.42358	162.697	7.34604	-0.456231	-0.0775446
Lamtor5	0.60858	1	0.0242765	11.0453	14.3465	20.9253	15.1301	23.8823	20.7212	30.0197	31.2178	30.7614	25.222	27.6499	25.2113	15.439	3.94851	19.9112	4.31551	30.6663	4.93858	26.0277	4.70198	0.367001	-0.236604
Mdh2	-0.193853	1	0.0243096	706.478	715.585	702.368	592.626	672.088	587.102	161.709	176.019	161.043	150.939	176.337	168.955	708.144	9.4679	617.272	9.26976	166.257	7.37727	165.41	7.36991	-0.198136	-0.00736661
Eif3h	-0.369799	1	0.0245179	483.755	539.949	449.821	403.226	392.466	362.449	155.02	164.471	156.841	150.846	168.314	165.224	491.175	8.94009	386.047	8.59263	158.778	7.31086	161.462	7.33505	-0.347461	0.024183
Akr1a1	0.203914	1	0.0245731	335.832	335.766	321.528	350.727	358.434	369.529	173.44	176.046	170.407	156.534	173.624	160.411	331.042	8.37087	359.563	8.4901	173.297	7.43711	163.523	7.35335	0.119231	-0.0837571
Baz1b	-0.398143	1	0.0246721	338.489	343.446	303.344	314.633	299.126	288.198	78.3069	78.5185	83.4395	88.4735	93.5129	107.639	328.426	8.35943	300.652	8.23195	80.0883	6.32352	96.5418	6.59308	-0.127474	0.269562
Atp2c1	-0.328141	1	0.0247881	41.3848	42.6047	42.7164	35.182	35.4254	36.9529	13.0313	14.2277	16.1329	14.3795	15.7819	15.7071	42.2353	5.40038	35.8535	5.16404	14.464	3.85439	15.2895	3.93447	-0.236338	0.080083
Eif4b	-0.380671	1	0.024973	887.956	793.114	663.259	746.297	679.053	561.373	264.821	241.496	240.514	275.616	267.32	278.452	781.443	9.61	662.241	9.37121	248.944	7.95968	273.796	8.09696	-0.238784	0.137281
Stim2	-0.407855	1	0.0250609	32.1571	35.0692	32.7589	25.1561	30.649	19.1672	17.5088	15.851	15.5363	17.3387	15.9307	14.9318	33.3284	5.05868	24.9907	4.64332	16.2987	4.02668	16.0671	4.00603	-0.415359	-0.020651
BC027231	-0.325701	1	0.0251975	57.0439	55.502	43.8709	56.8746	50.1528	46.6228	12.3374	10.2172	9.20766	14.2871	12.6004	12.0836	52.139	5.70429	51.2167	5.67854	10.5874	3.40428	12.9903	3.69937	-0.0257465	0.295086
Rps19	-0.467662	1	0.0252688	686.904	708.629	891.85	549.423	638.255	467.264	246.25	273.021	295.916	274.067	294.398	245.288	762.461	9.57452	551.647	9.1076	271.729	8.08602	271.251	8.08348	-0.466918	-0.00254122
Ola1	-0.371131	1	0.0257162	327.164	337.794	311.426	281.456	290.767	249.173	69.3303	64.6932	69.252	76.1052	73.073	71.7569	325.461	8.34634	273.799	8.09697	67.7585	6.08233	73.645	6.20252	-0.24937	0.120187
Ppp1r2	0.553914	1	0.0257247	9.50732	5.65164	7.50424	8.02078	10.9461	12.2601	31.0279	26.2251	25.4961	30.2618	25.258	22.8467	7.5544	2.91732	10.409	3.37976	27.583	4.78571	26.1222	4.7072	0.462438	-0.0785077
Nr3c1	-0.318522	1	0.0257941	76.478	70.718	71.4346	57.9683	57.1185	64.2359	27.537	24.745	29.7498	27.4876	25.2122	30.8615	72.8769	6.18739	59.7742	5.90145	27.344	4.77315	27.8538	4.7998	-0.285937	0.0266508
Uqcrh	0.384795	1	0.0258713	525.839	502.417	550.263	582.782	596.66	717.646	96.889	104.293	106.705	94.4842	100.265	87.7174	526.173	9.03939	632.363	9.30461	102.629	6.6813	94.1556	6.55697	0.265215	-0.124323
Eif4g3	-0.364889	1	0.0259422	53.269	53.0385	56.1375	52.135	45.3764	39.7157	30.5942	29.0488	33.5626	34.0763	32.2277	34.6079	54.1483	5.75884	45.7424	5.51546	31.0685	4.95738	33.6373	5.07199	-0.243385	0.114606
Lrp6	-0.434329	1	0.0262114	29.7803	32.026	34.635	32.2654	19.7029	23.4841	12.1098	10.1354	11.542	12.6457	11.3758	11.4464	32.1471	5.00662	25.1508	4.65253	11.2624	3.49344	11.8226	3.56348	-0.354084	0.0700393
Lsm7	0.884461	1	0.0262548	2.51664	3.18811	3.60781	4.55726	3.98038	8.2885	18.723	18.2382	22.6171	20.7602	20.3826	17.0353	3.10419	1.63422	5.60871	2.48767	19.8594	4.31175	19.3927	4.27744	0.853455	-0.0343126
Fam210b	0.401181	1	0.026633	27.8229	27.5336	38.5314	35.7289	38.6097	34.7081	36.8063	41.7897	43.8596	34.3999	36.9313	36.389	31.296	4.96791	36.3489	5.18384	40.8185	5.35115	35.9067	5.16618	0.215935	-0.184969
Tti2	0.378995	1	0.0266641	25.1664	22.6066	24.1002	26.6144	32.0421	28.4917	12.435	12.8363	10.5823	10.4494	12.0625	10.8937	23.9577	4.58242	29.0494	4.86044	11.9512	3.57909	11.1352	3.47705	0.278018	-0.102031
Sf3b2	-0.191258	1	0.0268619	703.262	692.833	654.745	699.084	679.452	609.895	125.033	121.215	123.616	135.473	136.109	136.835	683.614	9.41704	662.81	9.37245	123.288	6.94589	136.139	7.08894	-0.0445853	0.143046
Rps4x	-0.425059	1	0.0269013	63.8948	88.6873	77.7843	59.7912	67.8655	49.0403	437.99	459.141	442.279	422.116	489.297	472.243	76.7888	6.26282	58.899	5.88017	446.47	8.80242	461.219	8.84931	-0.382653	0.0468883
Atg3	-0.295802	1	0.027004	88.2224	97.0923	94.5246	80.3901	78.8116	74.0785	27.3527	28.8715	29.5942	29.1059	28.7943	29.8328	93.2798	6.54349	77.76	6.28096	28.6061	4.83825	29.2443	4.87008	-0.262535	0.0318327
Tmem87a	-0.369582	1	0.0271419	147.503	161.289	146.044	141.275	131.751	132.616	18.4628	19.7592	19.3491	21.0376	21.3897	23.8755	151.612	7.24424	135.214	7.0791	19.1904	4.26231	22.1009	4.46604	-0.165142	0.203726
Tada2a	-0.363869	1	0.0273253	54.9467	59.9944	53.3956	45.7549	49.7548	46.7955	10.6896	11.0357	10.712	10.4263	11.6161	13.12	56.1122	5.81024	47.4351	5.56788	10.8124	3.43462	11.7208	3.551	-0.242361	0.116384
Tomm5	0.481806	1	0.0274605	83.0493	92.7449	88.0305	105.546	97.1214	134.515	81.8954	79.4733	88.7048	85.4681	77.1587	65.4618	87.9416	6.45847	112.394	6.81243	83.3578	6.38125	76.0295	6.24849	0.353952	-0.132758
Gpr89	0.313324	1	0.0274704	64.7337	72.312	67.2495	78.9317	80.8018	78.05	18.1376	18.2314	19.8419	18.2403	16.7204	17.6264	68.0984	6.08955	79.2612	6.30854	18.7369	4.22781	17.529	4.13167	0.218993	-0.0961397
Uqcrc1	-0.187029	1	0.0274704	830.213	853.688	861.112	766.531	744.531	670.678	157.134	160.543	153.807	152.742	156.95	149.824	848.338	9.72849	727.247	9.5063	157.161	7.2961	153.172	7.25901	-0.222194	-0.0370929
Fth1	-0.38796	1	0.0275666	1345.29	1283.65	1032.27	1025.93	959.87	634.07	1854.8	1804.38	1811.29	1874.66	1733.38	1511.01	1220.4	10.2531	873.29	9.77032	1823.49	10.8325	1706.35	10.7367	-0.482821	-0.0957899
Got2	-0.376668	1	0.027801	177.983	168.825	146.188	142.551	119.81	124.846	87.5546	83.1428	88.3676	93.5826	85.8565	84.9997	164.332	7.36047	129.069	7.012	86.355	6.43221	88.1463	6.46183	-0.348473	0.0296198
Hcfc1	-0.37563	1	0.0278457	364.634	335.186	332.496	316.638	275.443	247.619	126.291	115.377	111.452	125.994	114.96	130.018	344.105	8.42671	279.9	8.12877	117.706	6.87905	123.657	6.9502	-0.297938	0.0711546
Me2	-0.379499	1	0.0279621	271.099	289.973	234.507	221.483	214.344	186.319	70.9348	73.253	69.9004	72.4757	71.0931	73.8988	265.193	8.0509	207.382	7.69614	71.3627	6.1571	72.4892	6.17969	-0.354754	0.0225947
Uvrag	-0.384195	1	0.0279621	41.9441	35.2141	37.0883	35.9112	33.0372	24.3475	17.6497	16.5672	15.0694	18.2634	16.3084	17.565	38.0821	5.25104	31.0986	4.95878	16.4288	4.03815	17.3789	4.11927	-0.292264	0.0811141
Nomo1	-0.390901	1	0.0280405	451.178	405.179	444.193	417.81	338.532	299.767	89.8638	86.1643	91.6357	98.7842	91.7275	93.4291	433.517	8.75994	352.036	8.45958	89.2213	6.47932	94.6469	6.56448	-0.300365	0.085168
Axin1	-0.350201	1	0.028136	40.9654	41.0106	41.9949	34.6352	35.6244	26.4196	42.5848	37.52	38.1016	41.9596	37.721	37.1336	41.3236	5.3689	32.2264	5.01017	39.4021	5.3002	38.9381	5.28311	-0.358724	-0.0170907
Nsmce2	-0.287022	1	0.0281568	68.3688	65.3562	57.5806	59.2444	53.7352	50.7671	16.2078	15.5373	14.2913	16.2984	16.2512	15.3693	63.7685	5.99477	54.5822	5.77036	15.3455	3.93974	15.973	3.99756	-0.224414	0.0578191
Gabarap	0.209992	1	0.0283302	224.261	255.193	261.35	243.358	262.506	261.433	89.7879	97.6843	90.3907	77.9778	88.443	83.1419	246.935	7.94799	255.766	7.99868	92.621	6.53327	83.1875	6.3783	0.0506933	-0.154971
Sbno1	-0.407595	1	0.0284488	327.583	340.982	290.068	279.269	260.317	247.446	51.6156	52.3888	57.4506	56.2235	53.8234	65.5001	319.544	8.31987	262.344	8.03532	53.8183	5.75003	58.5157	5.87075	-0.284557	0.120726
Mtdh	-0.393751	1	0.0286959	165.399	179.548	176.494	131.978	161.604	139.178	117.282	106.333	114.045	130.664	118.897	118.364	173.814	7.4414	144.253	7.17246	112.553	6.81446	122.642	6.93831	-0.268941	0.123842
Mfn2	-0.363012	1	0.028786	69.6272	68.979	79.6604	63.4371	58.3126	49.9037	29.2174	29.0147	29.672	30.308	27.5698	31.0458	72.7555	6.18498	57.2178	5.83839	29.3014	4.8729	29.6412	4.88953	-0.346593	0.0166344
Spop	-0.482035	1	0.0287867	44.6005	39.9962	37.2326	34.0883	31.6441	23.1387	50.7916	48.4056	59.1365	55.2063	51.2484	54.1842	40.6098	5.34376	29.6237	4.88868	52.7779	5.72186	53.5463	5.74272	-0.455076	0.0208528
Tmem55a	-0.348585	1	0.0288307	26.4248	28.2582	29.1511	22.604	21.2951	20.0305	20.2299	18.286	17.715	19.2113	17.4643	18.0179	27.9447	4.8045	21.3099	4.41345	18.7436	4.22833	18.2311	4.18833	-0.391053	-0.0399955
Utp15	-0.215482	1	0.0288984	283.402	285.191	266.112	243.54	252.953	249.173	42.5739	43.9791	41.0843	41.4972	43.8209	46.9525	278.235	8.12016	248.555	7.95742	42.5458	5.41094	44.0902	5.46239	-0.162736	0.0514431
Ndufb10	-0.208895	1	0.0289422	303.395	341.417	320.373	255.389	260.516	245.892	63.3459	71.4387	64.3499	55.7843	65.5311	60.5408	321.729	8.3297	253.932	7.9883	66.3782	6.05264	60.6187	5.92169	-0.3414	-0.130945
Mns1	-0.187749	1	0.0290419	686.624	763.551	801.511	643.12	722.44	778.256	90.124	102.309	119.388	99.6165	112.785	124.16	750.562	9.55183	714.605	9.481	103.94	6.69961	112.187	6.80977	-0.0708251	0.110154
Cdc42se1	0.330987	1	0.0291062	51.8708	60.574	63.3531	66.7183	70.8508	63.1998	57.3832	58.275	55.8684	52.5246	51.0081	52.3034	58.5993	5.87281	66.923	6.06443	57.1755	5.83733	51.9454	5.69892	0.191618	-0.138403
Ssna1	0.413711	1	0.0292025	99.1278	89.9915	116.46	113.931	119.013	137.969	55.0089	53.296	51.122	50.9295	49.566	45.1484	101.86	6.67044	123.638	6.94998	53.1423	5.73179	48.548	5.60134	0.279537	-0.130449
Atp5j2	0.388661	1	0.0293124	292.21	274.757	320.662	340.518	341.318	434.11	79.6404	91.8936	97.7568	82.5783	90.0566	84.1015	295.876	8.20885	371.982	8.53909	89.7636	6.48806	85.5788	6.41918	0.330239	-0.0688771
Cbfa2t2	-0.411653	1	0.0293765	24.1877	22.0269	22.0798	17.6822	18.9068	16.2316	10.5703	10.2581	10.5564	9.59407	10.6319	11.7305	22.7648	4.50873	17.6069	4.13807	10.4616	3.38703	10.6521	3.41307	-0.370667	0.0260393
Slc4a1	0.363061	1	0.0293796	402.523	435.321	373.625	479.241	534.765	475.207	89.3759	118.589	96.1487	88.1267	104.5	96.7609	403.823	8.65758	496.404	8.95537	101.371	6.66351	96.4624	6.59189	0.297793	-0.0716115
Usp39	-0.2312	1	0.0293796	142.33	148.392	126.851	127.056	115.033	119.838	40.1129	36.6265	35.9228	38.4919	38.03	37.9167	139.191	7.12092	120.642	6.91459	37.5541	5.2309	38.1462	5.25347	-0.206327	0.0225689
Nfe2l1	-0.400103	1	0.0294071	51.8708	51.0097	49.9321	43.7497	45.7744	34.0174	23.7317	25.3384	21.8649	23.858	24.5827	26.6852	50.9375	5.67066	41.1805	5.36389	23.645	4.56346	25.042	4.64628	-0.306768	0.0828134
Tssc4	0.427642	1	0.0294175	26.5646	27.6786	38.0984	37.9164	35.8235	42.3059	16.2728	18.5656	16.496	14.7263	16.2512	17.6648	30.7805	4.94395	38.6819	5.27359	17.1115	4.09689	16.2141	4.01918	0.329641	-0.0777167
Tmem167	0.383098	1	0.0294582	43.6218	33.3302	38.82	47.3955	50.1528	42.9966	61.1993	66.6779	63.3643	57.6569	59.271	60.5869	38.5907	5.27018	46.8483	5.54993	63.7472	5.99429	59.1716	5.88683	0.279744	-0.107457
Pi4kb	-0.354681	1	0.0294974	39.1478	45.7928	47.6231	37.3695	36.0225	34.1901	13.7468	15.9874	15.5363	13.5935	15.8392	17.6955	44.1879	5.46558	35.8607	5.16433	15.0902	3.91554	15.7094	3.97355	-0.301248	0.0580168
Xpo5	-0.20405	1	0.0295408	439.714	432.278	401.621	434.216	410.378	403.028	44.2977	42.2262	39.9431	48.4558	45.4689	48.7029	424.538	8.72975	415.874	8.7	42.1557	5.39765	47.5425	5.57115	-0.0297467	0.173493
Abhd14a	0.447824	1	0.0296434	11.1851	11.4482	12.6995	13.8541	12.7372	15.0229	12.0556	14.0299	13.176	10.3339	11.3529	12.4905	11.7776	3.55797	13.8714	3.79404	13.0872	3.71008	11.3924	3.51	0.236069	-0.20008
Hspa9	-0.361055	1	0.0298178	1260	1400.59	1125.35	1235.2	1078.49	969.064	323.722	313.508	290.054	331.978	343.952	352.942	1261.98	10.3015	1094.25	10.0957	309.095	8.27191	342.958	8.42189	-0.205748	0.149981
C330027C09Rik	-0.390933	1	0.0298897	167.217	157.377	147.776	144.374	127.77	115.694	26.7239	25.734	25.2108	26.4241	26.3566	30.4239	157.456	7.29881	129.279	7.01435	25.8896	4.6943	27.7349	4.79363	-0.284461	0.0993312
Btbd1	-0.435812	1	0.0301789	15.2397	14.9261	17.7504	10.7551	13.5333	9.66992	35.3102	33.9324	30.6576	33.822	31.2778	30.255	15.9721	3.99748	11.3195	3.50073	33.3001	5.05745	31.7849	4.99027	-0.496748	-0.0671822
Metap1	-0.220016	1	0.0301789	194.341	198.242	188.039	168.801	182.103	171.296	39.9286	38.0111	36.7788	43.1617	39.6322	37.7171	193.541	7.59649	174.066	7.44349	38.2395	5.25699	40.1704	5.32806	-0.152999	0.0710681
Kctd20	-0.317364	1	0.0305586	100.945	111.004	92.9371	80.3901	78.8116	78.9134	32.4047	32.0908	33.9257	32.851	31.2549	31.6215	101.629	6.66717	79.3717	6.31055	32.8071	5.03594	31.9091	4.9959	-0.356614	-0.0400371
Aff4	-0.36292	1	0.0309307	42.783	36.9531	35.2122	31.7185	33.4352	26.7649	27.9598	23.4832	23.3174	26.5629	23.7816	26.002	38.3161	5.25988	30.6396	4.93732	24.9202	4.63924	25.4488	4.66953	-0.322554	0.030286
Hsd17b4	-0.218664	1	0.0310931	238.242	218.965	216.901	216.926	213.946	209.457	25.9975	23.4014	25.3146	28.8516	26.2765	27.2303	224.703	7.81187	213.443	7.73771	24.9045	4.63833	27.4528	4.77888	-0.0741691	0.140547
Mpp5	-0.361377	1	0.0310975	44.7403	52.0241	45.6027	38.281	39.8038	45.5867	11.0582	11.2608	12.3201	12.3451	11.7649	14.5249	47.4557	5.56851	41.2239	5.36541	11.5463	3.52936	12.8783	3.68687	-0.203102	0.157507
Cnot2	0.224083	1	0.0312533	154.214	131.582	135.365	172.994	162.4	163.353	36.7088	37.7723	36.3638	37.3822	36.5079	38.4618	140.387	7.13327	166.249	7.3772	36.9483	5.20744	37.4506	5.22692	0.243932	0.0194817
Stk24	-0.381247	1	0.0315766	227.477	202.155	202.759	171.535	171.157	130.717	83.7818	70.9749	74.5431	84.6127	71.2762	67.4347	210.797	7.71971	157.803	7.30198	76.4333	6.25613	74.4412	6.21803	-0.417731	-0.0380991
Capn10	0.443634	1	0.0318887	9.50732	12.0279	11.112	9.66139	10.747	15.3683	16.6414	16.9969	19.4528	13.8941	13.39	15.853	10.8824	3.44393	11.9256	3.57599	17.697	4.14544	14.379	3.84589	0.132059	-0.299541
Dock9	-0.382884	1	0.032004	48.2357	47.097	44.4482	43.0205	42.7891	35.2261	15.1345	13.4297	15.4326	17.8935	14.3285	17.2195	46.5936	5.54206	40.3453	5.33433	14.6656	3.87436	16.4805	4.04269	-0.207734	0.168325
Vcp	-0.227353	1	0.0321056	114.368	114.627	112.131	102.812	119.412	105.851	97.2901	99.103	104.345	114.69	111.32	111.685	113.708	6.82919	109.358	6.77292	100.246	6.6474	112.565	6.81461	-0.0562781	0.167214
Suclg2	-0.3478	1	0.0322787	25.5859	24.6354	24.966	21.8748	22.2901	18.3038	17.4871	16.0079	15.9772	18.4946	16.1367	17.5573	25.0624	4.64745	20.8229	4.3801	16.4907	4.04358	17.3962	4.1207	-0.267354	0.0771167
Xrcc6	-0.218679	1	0.03283	183.715	189.113	187.173	165.337	175.535	176.821	31.8085	34.1029	36.1044	32.8972	36.5995	39.8052	186.667	7.54432	172.565	7.43099	34.0052	5.08769	36.434	5.18721	-0.11333	0.099527
Hdac2	-0.366809	1	0.0328903	246.072	241.716	230.322	188.853	210.761	177.857	50.8892	53.8553	52.2632	49.8891	55.46	56.9863	239.37	7.9031	192.491	7.58864	52.3359	5.70973	54.1118	5.75787	-0.314457	0.048143
Jmy	-0.315936	1	0.0330165	64.4541	57.241	59.8896	54.1402	53.7352	43.86	33.825	29.6286	32.2398	35.186	30.7628	33.1416	60.5282	5.91954	50.5785	5.66045	31.8978	4.99538	33.0301	5.04571	-0.259085	0.0503259
D19Bwg1357e	-0.369879	1	0.0330209	196.298	205.198	172.742	164.426	175.535	162.834	54.9656	60.3757	59.1884	60.6391	67.0074	69.5689	191.413	7.58054	167.598	7.38886	58.1766	5.86237	65.7385	6.03867	-0.191678	0.176301
Tax1bp1	-0.351245	1	0.0330209	133.382	142.595	128.438	122.317	120.805	114.83	22.5391	22.9649	24.5624	24.4822	25.876	28.5124	134.805	7.07473	119.317	6.89866	23.3555	4.54569	26.2902	4.71645	-0.176073	0.170764
Triobp	0.345065	1	0.0330715	26.285	23.1862	28.4295	25.7029	32.6391	32.2906	13.3348	11.8746	13.3835	11.9059	11.124	12.3062	25.9669	4.6986	30.2109	4.917	12.8643	3.6853	11.7787	3.55811	0.218395	-0.127194
Egln3	0.378067	1	0.0332053	15.7989	13.1872	25.8319	17.4999	15.7225	25.5562	12.6952	12.6794	17.741	10.7269	10.4374	14.7936	18.2727	4.19162	19.5929	4.29226	14.3719	3.84518	11.9859	3.58327	0.100641	-0.261905
Nono	-0.36956	1	0.0336593	253.762	252.875	247.496	237.16	204.393	200.996	123.765	121.413	115.368	126.226	128.293	141.61	251.377	7.97371	214.183	7.7427	120.182	6.90908	132.043	7.04486	-0.231012	0.135784
Ube2i	0.778097	1	0.033781	3.21571	2.31862	2.16468	3.46352	3.78136	5.35299	65.6768	71.8752	62.2749	61.9569	64.5927	65.0779	2.56634	1.35971	4.19929	2.07015	66.609	6.05764	63.8758	5.9972	0.710433	-0.0604469
Stam2	-0.33047	1	0.0339882	66.4115	65.646	59.0237	55.234	56.5215	48.3496	11.34	10.1354	9.33734	11.9984	9.88803	10.6096	63.6937	5.99308	53.3683	5.73791	10.2709	3.36049	10.832	3.43723	-0.255167	0.0767347
Oat	-0.183678	1	0.0340286	835.945	783.839	757.207	750.307	688.208	706.767	111.59	105.48	105.616	107.407	110.142	112.575	792.33	9.62996	715.094	9.48199	107.562	6.74902	110.041	6.7819	-0.147969	0.0328801
Uimc1	0.296934	1	0.0341096	32.4368	34.4895	35.6451	36.0935	44.5803	46.4501	13.389	14.5483	14.9916	13.7553	14.8664	14.7245	34.1905	5.09552	42.3746	5.40513	14.3097	3.83892	14.4487	3.85287	0.309607	0.0139547
Secisbp2l	-0.416754	1	0.034272	18.735	19.9981	17.3175	17.6822	12.3392	12.2601	13.1505	11.7791	12.2942	12.507	11.639	13.1123	18.6835	4.2237	14.0938	3.81699	12.4079	3.63319	12.4194	3.63453	-0.406706	0.0013354
C1qbp	-0.33272	1	0.034334	1525.65	1533.48	1551.36	1330.72	1259.79	1047.29	240.678	242.615	228.298	239.482	238.686	226.157	1536.83	10.5857	1212.6	10.2439	237.197	7.88994	234.775	7.87513	-0.341852	-0.0148066
Scaf8	-0.340576	1	0.0344421	54.6671	52.3139	49.2105	48.6715	50.3519	49.9037	29.6402	26.5116	25.2108	31.6951	32.262	34.1473	52.0638	5.70221	49.6424	5.6335	27.1209	4.76133	32.7015	5.03128	-0.0687103	0.269951
Dync1h1	-0.673485	1	0.0344435	128.069	115.641	141.282	180.285	76.2244	113.103	22.8969	19.5751	19.0637	29.8919	28.3136	32.7194	128.331	7.00372	123.204	6.94491	20.5119	4.35839	30.3083	4.92164	-0.058814	0.563252
Sec61a1	-0.214585	1	0.0347401	187.909	191.576	187.173	170.806	172.55	166.115	37.5652	39.7571	40.3062	39.9252	40.2159	42.3386	188.886	7.56137	169.824	7.40789	39.2095	5.29313	40.8266	5.35144	-0.15348	0.0583047
Gaa	-0.360887	1	0.0349009	139.674	110.135	127.716	116.119	95.5292	82.7123	24.9676	24.0016	23.7065	26.1467	23.0149	23.4763	125.842	6.97546	98.1202	6.61648	24.2252	4.59844	24.2126	4.59769	-0.358987	-0.000751454
Mrpl33	0.402085	1	0.0350396	14.4008	13.9117	16.7402	18.229	16.1206	21.93	26.2469	26.5934	25.6258	25.2682	25.7157	23.8601	15.0176	3.90858	18.7599	4.22958	26.1554	4.70904	24.948	4.64085	0.320996	-0.0681815
Ssu72	-0.334487	1	0.0351657	130.306	133.611	139.117	98.9837	113.441	98.0806	20.2841	22.658	22.9802	22.0548	21.653	20.1982	134.345	7.0698	103.502	6.69351	21.9741	4.45773	21.302	4.41292	-0.376284	-0.0448173
Kif1bp	-0.298232	1	0.0352374	91.5779	91.7305	91.7826	70.3641	85.1802	76.3233	16.3379	18.3678	18.7266	17.3156	18.3684	19.3767	91.697	6.5188	77.2892	6.27219	17.8108	4.15468	18.3536	4.19799	-0.246608	0.0433116
Skp1a	0.354236	1	0.0354843	547.23	574.874	520.967	634.735	635.468	730.424	106.267	113.856	102.218	96.3799	105.072	105.804	547.69	9.09722	666.876	9.38127	107.447	6.74748	102.419	6.67834	0.284057	-0.0691444
2700081O15Rik	-0.744158	1	0.0355147	5.45273	5.07199	4.18506	3.09894	2.78627	2.59016	17.8882	17.4948	17.2741	19.6967	15.9765	15.4461	4.90326	2.29374	2.82512	1.49831	17.5524	4.13359	17.0398	4.09084	-0.795428	-0.0427576
Foxk1	-0.346938	1	0.0356073	31.0386	26.2294	29.0068	24.2446	25.0764	20.5486	21.3791	18.5383	20.3347	22.8177	17.9221	21.2269	28.7583	4.8459	23.2899	4.54163	20.084	4.32798	20.6556	4.36846	-0.304274	0.0404806
Lasp1	0.399415	1	0.0356843	11.7443	10.8685	16.8845	13.4895	15.1255	17.9584	10.7871	12.1133	13.7466	9.6403	10.7349	12.5672	13.1658	3.71872	15.5245	3.95647	12.2157	3.61067	10.9808	3.45691	0.237746	-0.153751
Csnk2a2	-0.353385	1	0.0361238	158.549	165.347	140.993	136.535	129.362	113.967	35.1042	32.8001	33.2513	39.1623	34.8599	31.729	154.963	7.27578	126.622	6.98438	33.7186	5.07547	35.2504	5.13957	-0.291399	0.0640964
Gtf2i	-0.216826	1	0.0361723	151.838	144.334	147.776	147.473	134.537	143.149	80.9848	83.3884	83.2839	91.2014	85.8908	98.9642	147.983	7.20928	141.72	7.1469	82.5523	6.36724	92.0188	6.52386	-0.0623864	0.15662
Slc39a9	0.382511	1	0.0362052	14.5406	12.3177	14.4312	18.0467	16.1206	16.2316	32.2963	31.8453	32.3176	29.7763	29.4581	31.0074	13.7632	3.78274	16.7996	4.07036	32.1531	5.00688	30.0806	4.91076	0.287618	-0.0961232
Tspan31	0.565203	1	0.0364301	60.3995	58.8351	61.7657	71.0932	72.244	84.0937	22.5825	31.286	24.5883	15.7898	23.198	28.2053	60.3334	5.91488	75.8103	6.24432	26.1523	4.70886	22.3977	4.48528	0.329437	-0.223588
Atp6v0a1	-0.224803	1	0.0364461	137.996	129.408	127.572	129.244	120.208	110.168	32.4698	32.4114	31.4357	34.4231	33.1318	34.6309	131.659	7.04066	119.873	6.90536	32.1056	5.00475	34.0619	5.09009	-0.135295	0.0853333
Ralbp1	-0.311162	1	0.0366478	48.6551	56.8063	55.8489	36.6404	44.7793	43.3419	53.6212	56.8495	62.4305	53.4031	54.0637	58.0074	53.7701	5.74873	41.5872	5.37807	57.6338	5.84884	55.1581	5.7855	-0.370664	-0.0633417
Hook3	-0.336558	1	0.0366533	100.945	124.626	119.202	100.26	98.3155	109.305	17.422	17.2424	19.6862	19.9279	18.6316	22.7776	114.924	6.84454	102.627	6.68126	18.1169	4.17926	20.4457	4.35373	-0.163281	0.174464
Snrnp40	-0.207131	1	0.0366748	249.987	241.716	256.876	213.097	213.946	199.787	59.0636	59.5163	62.1971	59.83	58.55	56.1956	249.526	7.96305	208.943	7.70697	60.259	5.9131	58.1919	5.86275	-0.256079	-0.0503595
Neurl4	-0.376975	1	0.0369206	31.1784	29.4175	33.0475	23.3332	26.4696	23.6568	16.9233	18.1427	21.3462	19.6043	18.0594	19.4382	31.2145	4.96414	24.4865	4.61391	18.8041	4.23297	19.0339	4.2505	-0.35023	0.0175278
Got1	-0.355341	1	0.0369489	154.214	148.392	158.599	133.983	139.114	117.248	25.7156	23.34	24.9515	28.6897	26.0705	25.2496	153.735	7.2643	130.115	7.02365	24.669	4.62463	26.67	4.73714	-0.240658	0.112515
Ipo11	-0.362973	1	0.0370433	235.586	238.238	203.769	207.446	193.248	183.728	39.0938	35.8217	38.8537	42.8381	40.0099	43.0526	225.864	7.81931	194.807	7.60591	37.9231	5.245	41.9669	5.39118	-0.213408	0.146175
Bbip1	0.399398	1	0.0371154	18.8748	26.2294	24.966	20.4165	33.4352	32.8086	22.1597	24.2949	23.888	20.3672	23.0492	22.6548	23.3568	4.54577	28.8868	4.85234	23.4475	4.55136	22.0237	4.46099	0.30657	-0.0903781
Rpl23a	1.38138	1	0.0373076	0.419441	0.869484	0.432937	1.64061	1.79117	1.38142	217.694	258.295	287.227	268.01	292.601	251.721	0.573954	-0.800994	1.6044	0.682035	254.405	7.99099	270.777	8.08096	1.48303	0.0899772
Nt5dc2	-0.484269	1	0.0374011	83.7483	77.384	87.3089	58.1506	67.0695	41.0971	89.6145	91.4025	100.714	95.0391	82.7322	84.992	82.8138	6.3718	55.4391	5.79283	93.9102	6.55321	87.5877	6.45266	-0.578967	-0.100553
Ccdc6	-0.339295	1	0.0376006	27.9627	24.9252	28.7181	22.0571	25.4745	20.5486	27.6346	27.2959	28.7642	29.522	27.5698	30.8769	27.202	4.76564	22.6934	4.5042	27.8982	4.8021	29.3229	4.87395	-0.261442	0.0718526
Tmem63a	-0.325413	1	0.0378136	33.2756	35.0692	32.6146	29.7133	31.047	26.7649	11.2316	10.8993	10.3748	11.2817	11.6734	12.1757	33.6531	5.07267	29.1751	4.86667	10.8352	3.43766	11.7103	3.5497	-0.206003	0.112042
Hras	0.362644	1	0.0380972	30.6192	25.3599	30.4499	34.4529	33.6342	27.283	43.0401	43.5698	43.1074	36.8505	39.0371	34.961	28.8097	4.84848	31.79	4.9905	43.2391	5.43426	36.9495	5.20748	0.142021	-0.22678
Rpl8	-0.316662	1	0.0380972	4204.89	3908.33	4022.27	3578.36	3255.75	2823.96	841.374	897.458	888.734	856.716	921.189	823.304	4045.16	11.982	3219.36	11.6526	875.855	9.77455	867.07	9.76	-0.329425	-0.0145447
Fam179b	-0.347595	1	0.0381283	28.2423	27.2438	22.2241	24.7915	20.499	20.8939	13.595	10.3468	10.8676	14.4027	11.1469	12.0375	25.9034	4.69507	22.0615	4.46346	11.6032	3.53645	12.529	3.6472	-0.231614	0.110758
Sec31a	-0.213052	1	0.0381752	198.535	186.069	181.834	176.822	166.181	179.066	38.6602	39.2729	39.1131	40.5263	40.3761	44.0813	188.813	7.56081	174.023	7.44313	39.0154	5.28597	41.6612	5.38063	-0.117679	0.0946624
Agap3	-0.404433	1	0.0382364	17.6165	15.9405	21.7912	14.5832	12.9362	11.224	39.7769	37.3222	37.9459	37.4515	34.5166	34.5081	18.4494	4.2055	12.9145	3.69092	38.3483	5.26109	35.4921	5.14942	-0.514583	-0.111667
Ehmt2	-0.355703	1	0.0386115	79.1345	70.8629	86.1544	68.1766	64.2832	54.3933	31.1471	30.6926	34.7816	32.5736	30.8658	34.2931	78.7173	6.29861	62.2844	5.9608	32.2071	5.00931	32.5775	5.0258	-0.33781	0.0164965
Qk	-0.406403	1	0.0387318	110.453	120.134	114.44	100.807	96.5243	72.697	76.6699	63.0562	69.5373	81.8848	68.4609	65.5078	115.009	6.8456	90.0093	6.492	69.7545	6.12421	71.9512	6.16895	-0.353597	0.0447323
Supt4a	0.446511	1	0.0387418	88.3622	84.3399	102.173	102.629	110.257	147.466	48.58	50.4313	49.1767	48.4789	50.6533	43.0142	91.6251	6.51767	120.117	6.9083	49.396	5.62632	47.3821	5.56627	0.390631	-0.0600511
Cndp2	-0.299633	1	0.0387899	77.8762	75.3552	72.1562	70.3641	59.5067	59.5736	22.3331	22.3783	23.8362	23.5575	23.61	23.4455	75.1292	6.2313	63.1481	5.98067	22.8492	4.51407	23.5377	4.5569	-0.250633	0.0428271
Ago1	-0.414607	1	0.0391337	20.8322	16.2304	18.3277	14.4009	14.3294	11.3967	30.0197	29.2739	29.8536	29.3833	25.9904	30.4163	18.4634	4.2066	13.3757	3.74154	29.7157	4.89315	28.5967	4.83777	-0.465058	-0.0553796
Elp5	0.328696	1	0.0391441	73.1225	71.5875	80.9592	75.2859	88.9616	96.0084	39.7985	44.7362	41.1362	38.4687	38.3276	38.6997	75.2231	6.2331	86.752	6.43882	41.8903	5.38854	38.4987	5.26674	0.205722	-0.121807
Jund	0.438428	1	0.0393068	19.4341	16.0854	18.039	25.1561	24.2803	20.7212	86.0368	65.6139	68.837	88.8665	67.5911	57.8308	17.8529	4.15808	23.3859	4.54757	73.4959	6.19959	71.4295	6.15845	0.389483	-0.0411445
Cnot10	-0.292351	1	0.0394084	107.796	104.773	91.3497	94.0618	101.5	83.2303	26.7889	24.7723	23.8362	28.2967	28.7371	27.2457	101.306	6.66258	92.9307	6.53808	25.1325	4.65148	28.0932	4.81215	-0.124497	0.160666
Dyrk1a	-0.310466	1	0.0396063	66.4115	61.5884	54.6944	54.1402	51.944	45.2414	31.8952	27.521	29.5942	34.215	28.1534	28.9346	60.8981	5.92832	50.4419	5.65655	29.6701	4.89094	30.4343	4.92763	-0.271775	0.0366882
Eftud2	-0.178268	1	0.03997	770.233	717.469	696.451	751.036	728.808	698.824	113.151	105.999	109.818	132.583	118.874	120.091	728.051	9.5079	726.223	9.50427	109.656	6.77684	123.849	6.95244	-0.0036271	0.175606
Prpsap1	-0.277868	1	0.0400592	105.979	109.12	99.1426	81.1192	88.5635	77.8774	31.6242	29.9355	29.4645	30.0768	28.5196	28.2206	104.747	6.71077	82.52	6.36667	30.3414	4.92322	28.939	4.85494	-0.344095	-0.0682705
Tfdp1	-0.325921	1	0.0400898	29.3609	25.0701	24.6774	18.4113	20.698	20.3759	136.904	131.637	131.579	131.08	122.01	123.838	26.3695	4.7208	19.8284	4.3095	133.373	7.05933	125.643	6.97318	-0.411299	-0.0861459
Psma2	-0.202528	1	0.0401568	199.514	226.79	221.231	196.144	214.145	193.398	84.6166	94.6014	94.6444	91.1321	103.779	98.7185	215.845	7.75385	201.229	7.6527	91.2874	6.51234	97.8764	6.61289	-0.101157	0.100544
Nadk2	-0.198813	1	0.0401871	260.752	262.294	280.832	220.024	230.265	228.452	116.87	110.261	120.115	116.1	106.502	113.98	267.959	8.06587	226.247	7.82176	115.749	6.85485	112.194	6.80985	-0.244115	-0.0449961
Gnai2	0.210404	1	0.040221	140.792	153.754	161.485	151.119	171.356	152.819	109.606	110.793	111.789	99.6396	99.6242	99.8547	152.01	7.24803	158.431	7.30771	110.729	6.79089	99.7062	6.63961	0.0596853	-0.151283
Idh3a	-0.180485	1	0.0405154	655.166	700.224	673.073	594.084	629.697	577.95	152.321	147.775	141.098	148.211	145.299	150.385	676.154	9.40121	600.577	9.23021	147.064	7.2003	147.965	7.20911	-0.171003	0.00880809
Lsm14b	-0.470055	1	0.0405488	53.6884	45.7928	48.3446	36.6404	39.6048	26.4196	17.4979	17.7403	20.8275	18.1709	17.0179	18.3864	49.2753	5.62279	34.2216	5.09683	18.6886	4.22408	17.8584	4.15853	-0.525957	-0.0655507
Smcr8	-0.31889	1	0.0405488	45.1598	38.1124	40.2631	35.9112	37.0176	31.2545	22.8427	21.9213	20.594	24.2741	21.3668	23.0694	41.1784	5.36382	34.7278	5.11802	21.786	4.44533	22.9035	4.51749	-0.245799	0.0721629
Whsc1l1	-0.360206	1	0.0407499	27.1238	30.8667	27.4193	24.4269	23.6833	21.93	35.668	32.8547	38.724	37.7521	35.5237	39.0222	28.4699	4.83137	23.3467	4.54515	35.7489	5.15983	37.4326	5.22622	-0.286219	0.0663974
Pitpnc1	-0.35986	1	0.0409316	30.3395	30.7218	30.017	25.7029	25.4745	24.3475	19.6987	18.7429	22.5393	22.7021	18.7918	23.1769	30.3594	4.92407	25.175	4.65392	20.327	4.34532	21.5569	4.43008	-0.270155	0.0847556
Vdac2	-0.178554	1	0.0410216	692.077	666.314	647.529	654.422	612.979	541.17	195.794	194.461	188.874	205.174	195.437	189.338	668.64	9.38509	602.857	9.23567	193.043	7.59278	196.65	7.61949	-0.149414	0.0267052
Zfp64	-0.410576	1	0.0410346	24.3276	26.5192	26.2648	21.5103	19.3049	16.7497	15.1887	12.8568	14.5766	15.9747	13.6876	12.4905	25.7039	4.68391	19.1883	4.26215	14.2074	3.82857	14.0509	3.81259	-0.421762	-0.015975
Rcor1	-0.354367	1	0.0410766	151.838	157.811	146.621	133.437	127.372	108.787	32.6324	28.4418	26.793	31.9725	28.142	30.3702	152.09	7.24878	123.198	6.94484	29.2891	4.87229	30.1616	4.91464	-0.303941	0.042349
Usp5	-0.220398	1	0.0411178	153.515	135.06	130.17	142.004	128.168	119.147	26.5071	24.861	25.8333	30.5161	26.2994	26.6699	139.582	7.12496	129.773	7.01985	25.7338	4.68559	27.8285	4.79849	-0.105116	0.112897
Uspl1	0.26923	1	0.0411522	57.0439	53.3283	55.1273	66.1714	63.6861	61.3004	52.9599	49.5583	49.047	51.3225	46.682	47.3057	55.1665	5.78572	63.7193	5.99366	50.5217	5.65883	48.4367	5.59803	0.207937	-0.0608029
Psmg3	0.315182	1	0.0411902	50.7523	54.9224	62.1986	56.8746	68.6616	72.3517	26.8431	30.0242	30.4501	26.8634	28.966	26.9232	55.9578	5.80627	65.9626	6.04358	29.1058	4.86324	27.5842	4.78577	0.237311	-0.0774651
Dnaja2	-0.182237	1	0.0412067	607.21	639.795	576.816	559.814	593.674	554.121	116.024	114.729	119.7	127.335	124.928	119.922	607.941	9.24779	569.203	9.1528	116.817	6.86811	124.062	6.95492	-0.0949872	0.0868035
Itm2b	-0.190829	1	0.0415453	420.14	518.357	525.585	395.023	444.808	421.159	55.2691	63.179	61.7302	52.594	62.464	62.8439	488.027	8.93082	420.33	8.71538	60.0594	5.90832	59.3006	5.88998	-0.215439	-0.0183439
Slc7a6	-0.368928	1	0.0417581	82.6298	102.889	78.9388	76.1974	91.5488	57.6741	23.4173	25.2498	22.7987	25.6844	27.2951	24.9963	88.1525	6.46193	75.1401	6.23151	23.8219	4.57422	25.9919	4.69999	-0.230418	0.125774
Larp4	-0.340537	1	0.042095	81.5113	82.3111	67.9711	72.5516	69.6567	65.4446	60.9608	46.9187	51.3554	66.7192	57.108	56.449	77.2645	6.27173	69.2176	6.11307	53.0783	5.73005	60.092	5.9091	-0.158666	0.179051
Minos1	0.364398	1	0.042095	290.113	278.525	307.962	309.529	361.817	375.573	93.2246	97.4728	91.2725	85.9074	94.7603	80.7083	292.2	8.19081	348.973	8.44697	93.99	6.55444	87.1253	6.44502	0.256158	-0.109415
Trip4	-0.276828	1	0.042095	61.3782	61.8782	69.2699	57.9683	62.691	59.5736	11.8929	12.9182	13.2538	13.1774	14.4429	15.4845	64.1754	6.00395	60.0777	5.90876	12.6883	3.66543	14.3683	3.84482	-0.0951927	0.179386
Dedd2	0.505402	1	0.0424723	15.9387	10.2889	17.3175	14.0364	21.096	19.1672	14.7442	15.5373	14.6804	12.7844	13.1039	13.619	14.515	3.85948	18.0998	4.17791	14.9873	3.90567	13.1691	3.71909	0.318429	-0.186582
Zbtb44	-0.416291	1	0.0424832	20.273	17.3897	16.3073	13.4895	15.7225	10.706	20.7937	19.1658	18.6488	19.3731	18.0022	19.8681	17.99	4.16912	13.306	3.734	19.5361	4.28807	19.0811	4.25407	-0.435117	-0.0339964
Kcmf1	-0.427382	1	0.0426213	25.5859	23.3311	19.7708	19.8697	21.096	11.224	21.3357	19.2272	18.1041	19.9742	19.9821	18.9084	22.8959	4.51702	17.3966	4.12073	19.5557	4.28952	19.6216	4.29437	-0.396289	0.0048521
Dynll1	0.496878	1	0.0427586	128.628	142.45	225.704	145.65	202.004	295.968	71.9214	96.8454	99.5983	71.4353	87.2413	82.8732	165.594	7.37151	214.541	7.74511	89.455	6.48309	80.5166	6.33121	0.373599	-0.151876
Mina	-0.28319	1	0.0427829	57.1838	63.6172	59.7453	55.0517	57.3175	54.3933	13.2698	14.9848	14.6285	15.9747	15.8392	16.3981	60.1821	5.91126	55.5875	5.79669	14.2944	3.83737	16.0706	4.00636	-0.114574	0.168981
Mapk1	-0.187595	1	0.0428408	435.519	502.851	482.003	398.851	433.265	394.74	113.801	114.927	113.578	108.032	111.778	117.143	473.458	8.88709	408.952	8.67579	114.102	6.83418	112.318	6.81144	-0.211305	-0.0227415
Zfp740	-0.364182	1	0.0428408	23.4887	26.6642	21.6468	16.0416	19.3049	17.7857	33.0227	32.8547	31.9285	30.5623	30.3622	32.0898	23.9332	4.58094	17.7107	4.14655	32.602	5.02689	31.0048	4.95442	-0.434392	-0.0724687
Adgrl1	-0.606979	1	0.0430085	6.43142	7.82535	6.63837	4.73955	4.97548	2.93551	28.1116	28.244	29.9314	25.5919	24.0334	29.234	6.96505	2.80013	4.21685	2.07616	28.7623	4.84611	26.2864	4.71625	-0.723969	-0.129862
Ralgapa1	-0.361553	1	0.0431476	85.1465	88.9772	86.1544	81.4838	73.6371	63.7178	22.5717	20.3594	23.8362	25.1758	21.5042	25.0961	86.7594	6.43895	72.9462	6.18876	22.2557	4.47611	23.9253	4.58047	-0.250186	0.104362
Hspa4	-0.321826	1	0.0431878	1407.5	1374.07	1231.13	1272.2	1246.46	1121.19	181.365	181.461	186.098	202.053	204.822	215.017	1337.57	10.3854	1213.28	10.2447	182.975	7.5155	207.298	7.69556	-0.140695	0.180058
Wdr5	-0.212691	1	0.0432002	162.184	178.534	145.178	131.067	140.508	130.544	51.5831	51.4476	49.5139	49.7736	48.742	47.7816	161.965	7.33954	134.039	7.06651	50.8482	5.66812	48.7657	5.6078	-0.273028	-0.0603279
Zhx1	0.354029	1	0.0432743	50.4727	57.9656	48.056	63.0725	70.2538	65.0993	41.3163	35.7398	37.1419	40.3876	35.4207	37.4637	52.1648	5.705	66.1418	6.04749	38.066	5.25043	37.7573	5.23868	0.342488	-0.0117467
Cct2	-0.307642	1	0.043307	2205.56	2208.78	1971.02	2033.45	1933.07	1630.59	303.384	302.738	273.74	311.472	323.295	315.74	2128.45	11.0556	1865.7	10.8655	293.287	8.19617	316.836	8.30759	-0.190084	0.11142
Pola2	0.209571	1	0.043344	168.336	156.652	178.947	184.842	171.356	191.154	35.3753	34.2734	37.2716	34.7929	32.7656	33.0341	167.978	7.39213	182.45	7.51136	35.6401	5.15543	33.5309	5.06742	0.119231	-0.0880105
Atf1	-0.380565	1	0.043449	64.4541	63.907	66.095	50.3121	58.1136	44.896	74.0897	63.5746	66.2433	79.8273	67.9688	61.3853	64.8187	6.01834	51.1073	5.67546	67.9692	6.08681	69.7271	6.12365	-0.342882	0.0368389
Bpgm	0.367372	1	0.0436265	122.057	131.872	161.774	140.728	168.967	193.916	72.3551	83.3747	80.5865	71.181	75.2818	75.1578	138.568	7.11445	167.871	7.39121	78.7721	6.29961	73.8735	6.20699	0.276759	-0.0926265
Zdhhc13	-0.312193	1	0.043686	73.9614	75.3552	74.6095	68.3589	57.3175	58.0195	17.6388	18.777	17.9225	18.4484	17.6703	19.2616	74.642	6.22192	61.232	5.93621	18.1128	4.17894	18.4601	4.20634	-0.285703	0.0273984
Lrp10	-0.359334	1	0.0437559	118.702	119.844	134.788	90.2337	96.3253	78.2227	69.6772	69.9586	68.0329	64.7542	61.4798	62.391	124.444	6.95936	88.2606	6.4637	69.2229	6.11318	62.875	5.97441	-0.49566	-0.138765
Rad50	-0.318411	1	0.0437559	114.927	109.845	105.637	120.676	96.9223	111.204	23.233	21.4371	24.0955	27.2333	27.2836	30.3165	110.136	6.78314	109.601	6.77612	22.9219	4.51865	28.2778	4.8216	-0.00702743	0.302945
Dnaja1	-0.345297	1	0.0437837	51.3116	54.7775	60.3225	43.2028	40.2019	60.0916	65.1781	76.0562	87.356	73.6547	84.7006	90.5271	55.4705	5.79365	47.8321	5.57991	76.1968	6.25166	82.9608	6.37436	-0.213742	0.1227
U2af1l4	0.400663	1	0.0438316	34.3941	28.8379	36.2224	35.3643	44.5803	47.8315	13.8769	13.6957	13.9801	14.0328	13.8364	12.6901	33.1515	5.051	42.5921	5.41251	13.8509	3.79191	13.5197	3.757	0.361512	-0.0349123
Brwd1	0.375427	1	0.043915	15.9387	16.81	13.9983	21.328	20.499	16.577	17.3028	16.0352	16.8072	16.7607	14.7519	16.4672	15.5824	3.96184	19.468	4.28303	16.7151	4.06308	15.9933	3.99939	0.32119	-0.0636829
Khsrp	-0.402225	1	0.0440203	317.517	299.972	288.336	275.623	261.113	190.981	92.9861	87.3511	96.9009	99.7321	92.0365	101.329	301.941	8.23813	242.572	7.92227	92.4127	6.53002	97.6991	6.61027	-0.315854	0.0802539
Etnk1	-0.338308	1	0.0442481	119.96	128.104	119.491	96.4316	98.5145	93.2456	48.8619	45.7251	47.0758	47.0456	43.0541	50.2613	122.518	6.93685	96.0639	6.58592	47.2209	5.56135	46.787	5.54804	-0.350929	-0.0133184
2810403A07Rik	-0.326827	1	0.0443568	79.4141	95.933	81.6808	77.838	75.8263	67.5167	25.553	24.329	25.8852	28.3892	27.2951	25.9943	85.676	6.42082	73.727	6.20412	25.2557	4.65854	27.2262	4.76692	-0.216697	0.108384
Zmiz2	-0.325899	1	0.0444847	37.1904	31.7361	36.0781	26.2498	29.2558	24.8655	68.0402	62.0127	64.7908	64.2687	58.5042	63.6193	35.0015	5.12935	26.7904	4.74364	64.9479	6.02121	62.1307	5.95723	-0.385704	-0.063976
Tnks	-0.325487	1	0.0445167	108.495	101.73	97.6994	103.723	96.3253	87.8926	13.2156	10.3605	10.2711	15.0962	11.4788	13.0662	102.641	6.68147	95.9804	6.58467	11.2824	3.496	13.2138	3.72397	-0.096802	0.22797
Arpc2	-0.344861	1	0.0447133	333.595	367.502	324.847	257.941	302.31	238.122	129.229	139.733	136.351	125.116	137.826	136.635	341.981	8.41777	266.124	8.05596	135.104	7.07793	133.192	7.05737	-0.361818	-0.020563
Usp37	-0.299301	1	0.0448073	60.2597	66.8053	68.837	60.885	64.4822	63.0271	11.8604	11.3426	12.3979	14.079	12.8636	15.2465	65.3006	6.02903	62.7981	5.97265	11.867	3.56888	14.063	3.81384	-0.0563761	0.244955
0610010F05Rik	-0.373921	1	0.0448365	25.3063	26.6642	24.3888	22.604	23.6833	15.7136	16.0777	15.1962	15.8475	16.3446	15.7934	16.851	25.4531	4.66977	20.667	4.36925	15.7072	3.97335	16.3297	4.02942	-0.300513	0.0560723
Pde6d	0.380109	1	0.0448855	31.1784	24.4905	40.6961	33.5414	35.2264	35.9168	16.8583	18.3201	20.4384	14.7494	14.4773	17.6034	32.1217	5.00547	34.8949	5.12494	18.5389	4.21248	15.61	3.9644	0.11947	-0.248085
Itgb2	-0.226042	1	0.0449037	137.716	142.45	140.849	128.15	117.421	109.823	21.6393	21.4166	21.9946	21.1763	21.6987	21.0426	140.339	7.13277	118.465	6.88831	21.6835	4.43853	21.3059	4.41318	-0.244454	-0.0253459
Dock8	-0.205969	1	0.0450603	207.903	196.358	185.586	178.462	171.555	181.138	43.864	42.7514	45.8567	46.8144	43.5463	47.0139	196.616	7.61923	177.052	7.46803	44.1574	5.46458	45.7915	5.51701	-0.151207	0.0524264
Npepps	-0.335817	1	0.0452052	133.662	139.987	135.798	117.03	121.601	110.859	31.4941	32.2409	35.4041	32.7123	35.4092	38.4464	136.482	7.09257	116.497	6.86414	33.0463	5.04642	35.5226	5.15067	-0.228425	0.104248
Snx6	-0.217754	1	0.0454049	147.643	162.449	155.713	138.358	140.508	143.149	18.311	19.3977	17.6891	18.5408	19.9706	20.0984	155.268	7.27862	140.672	7.13619	18.4659	4.20679	19.5366	4.28811	-0.14243	0.0813135
Stk4	-0.21491	1	0.0454584	122.197	131.437	141.282	109.192	118.217	111.549	46.26	45.9502	50.0326	46.8375	45.3545	49.4629	131.639	7.04044	112.986	6.82	47.4143	5.56725	47.2183	5.56127	-0.220435	-0.00597489
Cdca7l	-0.281223	1	0.0455433	60.1198	63.907	61.477	54.8694	51.944	47.8315	18.3761	17.5903	16.7035	17.6392	17.6474	17.9718	61.8346	5.95034	51.5483	5.68785	17.5566	4.13394	17.7528	4.14998	-0.26249	0.0160346
Acp1	0.537054	1	0.0456357	8.94807	7.10078	5.77249	13.4895	11.1451	7.77047	17.0534	18.3337	17.1703	16.4139	18.6545	18.0947	7.27378	2.86271	10.8017	3.43318	17.5192	4.13086	17.721	4.14739	0.570478	0.0165305
Cul5	-0.320848	1	0.0457715	134.361	134.625	117.615	116.848	116.625	106.542	27.4394	23.7561	25.2627	30.2155	25.9904	27.6525	128.867	7.00974	113.338	6.82449	25.4861	4.67164	27.9528	4.80492	-0.185244	0.133286
Psap	-0.344139	1	0.0458003	457.051	461.696	476.086	392.289	368.584	349.844	62.587	69.3107	67.7736	63.0203	66.8587	72.0486	464.944	8.86091	370.239	8.53231	66.5571	6.05652	67.3092	6.07273	-0.328602	0.0162113
Emc10	0.354799	1	0.045907	110.313	105.932	125.84	133.072	125.78	128.99	69.4171	71.998	63.9349	62.0725	61.3424	58.8826	114.028	6.83325	129.281	7.01436	68.45	6.09698	60.7658	5.92519	0.181112	-0.17179
Zfyve1	0.338587	1	0.0460988	20.1332	16.81	19.1935	21.5103	21.4941	22.2753	11.3617	11.4654	12.9167	10.2876	10.7235	11.5769	18.7122	4.22591	21.7599	4.4436	11.9146	3.57466	10.8627	3.44131	0.21769	-0.133351
Twf2	-0.319366	1	0.0463446	61.2383	61.0088	74.1765	50.859	47.1675	51.6304	10.9389	13.0273	13.3057	10.8425	11.6276	13.1353	65.4745	6.03286	49.8857	5.64055	12.424	3.63505	11.8685	3.56906	-0.392309	-0.0659936
Rnf181	0.367159	1	0.0463588	49.3542	54.0529	66.095	65.26	63.4871	75.1145	20.0781	25.4203	22.4356	17.9629	22.1908	23.9292	56.5007	5.8202	67.9539	6.08648	22.6447	4.5011	21.361	4.41691	0.266287	-0.084194
Lsm4	0.399311	1	0.0463776	230.692	164.332	218.633	267.42	231.061	209.975	128.903	122.818	116.094	114.204	113.174	94.4654	204.553	7.67633	236.152	7.88357	122.605	6.93788	107.281	6.74526	0.207245	-0.192622
Samm50	-0.190816	1	0.0464174	347.716	348.518	373.48	320.284	329.974	307.193	80.5186	87.2761	86.2667	86.6934	89.1525	83.5871	356.572	8.47805	319.15	8.31809	84.6871	6.40407	86.4777	6.43426	-0.159956	0.0301852
Srsf6	-0.331736	1	0.0465676	443.908	459.522	411.001	376.43	392.267	334.994	186.926	166.927	165.064	193.384	178.82	175.404	438.144	8.77526	367.897	8.52316	172.972	7.4344	182.536	7.51204	-0.252104	0.0776412
Cib1	0.312865	1	0.0466431	78.1558	70.2833	73.022	83.1244	82.3939	79.2588	20.9671	23.3741	20.3087	17.6392	20.5886	19.1848	73.8204	6.20595	81.5924	6.35036	21.55	4.42962	19.1375	4.25833	0.144416	-0.171281
Rps8	-1.52756	1	0.0467053	0.699068	1.59405	1.44312	0.364581	0.597058	0.345354	522.357	579.026	568.126	523.304	599.359	555.147	1.24541	0.316626	0.435664	-1.19871	556.503	9.12025	559.27	9.1274	-1.51534	0.00715579
Rap1gds1	-0.328485	1	0.0468588	42.5033	48.5462	51.0866	34.2706	43.9832	36.6075	17.2594	18.2314	18.8562	17.4774	17.3727	20.2673	47.3787	5.56617	38.2871	5.25879	18.1157	4.17917	18.3725	4.19947	-0.307379	0.0203056
Crtc3	-0.419948	1	0.0468629	17.3369	18.9837	17.8947	15.677	13.1353	12.2601	20.8479	19.7387	16.6516	20.2978	18.3112	19.4228	18.0718	4.17567	13.6908	3.77513	19.0794	4.25394	19.3439	4.27381	-0.400535	0.0198642
Aldoa	-0.349338	1	0.0468733	555.759	602.987	602.648	437.861	494.165	424.44	238.629	308.74	269.382	216.641	297.568	287.887	587.131	9.19754	452.155	8.82068	272.25	8.08879	267.365	8.06267	-0.376864	-0.0261211
Dgkd	-0.449024	1	0.0469212	26.285	32.7505	25.6876	24.7915	20.698	17.095	20.1107	18.777	18.9341	18.8876	18.2425	20.8277	28.241	4.81972	20.8615	4.38277	19.2739	4.26858	19.3193	4.27197	-0.436949	0.00338971
Snx17	-0.262776	1	0.0469982	110.593	111.439	113.429	95.3379	96.7233	87.8926	33.8358	33.5299	31.9285	33.637	32.056	33.702	111.82	6.80504	93.3179	6.54408	33.0981	5.04868	33.1317	5.05014	-0.260955	0.00146322
Slc7a8	-0.330998	1	0.0471228	39.2876	61.1537	65.2292	31.3539	50.1528	47.4862	10.4077	19.1795	19.4269	9.8946	17.7504	20.321	55.2235	5.78721	42.9977	5.42619	16.338	4.03016	15.9887	3.99898	-0.361024	-0.0311817
Tm9sf2	-0.347635	1	0.0471806	435.1	472.274	422.691	408.513	365.996	351.052	50.5206	50.4995	51.6148	51.6924	55.254	57.209	443.355	8.79232	375.187	8.55147	50.8783	5.66898	54.7184	5.77396	-0.240852	0.104976
Btaf1	-0.360877	1	0.0471875	378.755	367.212	276.647	333.774	308.679	274.211	75.1413	64.4067	61.1855	80.3821	73.2103	76.8774	340.871	8.41308	305.555	8.25529	66.9112	6.06418	76.8233	6.26347	-0.157797	0.199297
Cep120	-0.31354	1	0.0473232	34.534	35.5039	33.4805	29.7133	27.8627	27.9737	12.435	12.318	13.8504	13.4086	12.0739	14.0028	34.5061	5.10878	28.5166	4.83373	12.8678	3.68569	13.1618	3.71828	-0.275051	0.0325908
Zfp568	-0.46173	1	0.0475422	16.0786	16.3753	16.7402	14.5832	12.9362	10.5333	9.30186	10.9879	10.9973	9.52471	10.8379	12.8359	16.398	4.03545	12.6843	3.66497	10.429	3.38253	11.0662	3.46809	-0.370482	0.0855521
Phactr4	0.352459	1	0.0475458	140.652	132.451	115.45	171.535	159.016	142.977	59.9743	56.7131	55.4016	53.3338	53.1711	57.1706	129.518	7.01701	157.843	7.30234	57.363	5.84205	54.5585	5.76973	0.285337	-0.0723165
Nop2	-0.207394	1	0.0476167	179.241	178.824	159.898	168.619	177.525	152.819	43.8749	43.4743	39.7615	44.2252	49.5889	46.9065	172.654	7.43174	166.321	7.37783	42.3702	5.40498	46.9069	5.55173	-0.053916	0.146747
Tmem248	-0.360565	1	0.0476494	54.8069	57.6757	55.8489	45.208	48.5607	35.2261	59.8333	50.786	49.5657	59.4601	50.6762	46.6608	56.1105	5.8102	42.9983	5.42621	53.395	5.73863	52.2657	5.70779	-0.383992	-0.0308412
Tcp11l2	0.321638	1	0.047708	41.9441	65.3562	60.7555	54.5048	77.6175	82.5396	7.95754	11.3972	11.0751	9.29353	11.1011	10.8015	56.0186	5.80783	71.554	6.16096	10.1433	3.34245	10.3987	3.37834	0.353127	0.0358837
Nrd1	-0.362494	1	0.0477482	352.051	413.439	331.052	322.472	340.522	294.932	68.6148	68.3081	73.2463	75.2499	77.1587	83.6409	365.514	8.51378	319.309	8.31881	70.0564	6.13044	78.6831	6.29798	-0.194976	0.167538
Mib1	-0.452076	1	0.0480732	82.9095	72.312	76.3412	56.6923	68.0646	45.9321	15.5139	11.3017	11.6717	14.5645	11.8107	12.1604	77.1876	6.2703	56.8963	5.83026	12.8291	3.68135	12.8452	3.68316	-0.440033	0.00180689
Fam213a	0.344462	1	0.0482612	95.213	83.3255	106.791	123.957	107.669	117.766	50.6073	53.5893	55.8944	48.5714	51.1339	55.1592	95.1099	6.57152	116.464	6.86374	53.3637	5.73779	51.6215	5.6899	0.292219	-0.0478849
Dhx36	-0.36055	1	0.048281	225.379	223.023	177.504	202.707	181.705	174.058	30.0413	25.2361	26.793	32.2499	29.7442	31.6292	208.635	7.70484	186.157	7.54037	27.3568	4.77383	31.2078	4.96383	-0.164467	0.190006
Rps10	-0.399637	1	0.0484186	65.0133	91.8754	94.3802	51.0413	80.0057	55.2567	186.167	241.987	232.396	197.522	230.847	211.632	83.7563	6.38813	62.1012	5.95655	220.184	7.78256	213.334	7.73697	-0.431576	-0.0455961
Mink1	-0.269811	1	0.0489534	51.032	51.8792	55.1273	42.2914	38.4107	42.3059	32.459	31.9408	35.6635	30.3311	30.7513	32.6656	52.6795	5.71917	41.0027	5.35765	33.3544	5.0598	31.2494	4.96575	-0.361524	-0.0940503
Kmt2c	-0.506808	1	0.0489674	111.012	116.511	122.665	122.499	69.2587	77.532	17.8015	15.8101	18.96	20.0435	17.0981	19.2539	116.729	6.86702	89.7633	6.48805	17.5239	4.13125	18.7985	4.23254	-0.378971	0.101297
Poc5	-0.350422	1	0.0489674	26.1451	30.8667	27.5637	27.7081	21.6931	21.93	13.4758	11.4995	12.4239	13.6398	12.9895	13.3273	28.1918	4.8172	23.7771	4.5715	12.4664	3.63997	13.3188	3.7354	-0.245705	0.0954262
Cebpz	-0.349665	1	0.0489701	209.441	219.979	176.061	181.014	191.456	183.21	66.0346	65.764	68.2664	77.3767	77.8339	78.8811	201.827	7.65698	185.227	7.53315	66.6883	6.05936	78.0306	6.28597	-0.123825	0.226606
Ikbkb	-0.274598	1	0.0489701	94.7936	90.7161	93.6587	83.6713	81.7969	71.661	31.4615	30.1674	29.672	30.7704	30.9459	31.7597	93.0561	6.54003	79.0431	6.30457	30.4337	4.9276	31.1587	4.96156	-0.235463	0.0339657
Cep76	-0.344615	1	0.049102	144.148	140.422	121.078	117.213	126.576	104.815	28.5669	26.9345	25.0033	29.8225	27.3752	30.3318	135.216	7.07912	116.201	6.86048	26.8349	4.74604	29.1765	4.86674	-0.218638	0.120697
Ints6	-0.324586	1	0.0494922	106.398	92.1653	91.9269	94.6087	96.7233	85.1298	14.4298	13.9072	13.8763	16.7607	15.4157	18.0102	96.8301	6.59738	92.1539	6.52597	14.0711	3.81466	16.7289	4.06427	-0.0714098	0.249607
Mthfd1l	-0.400645	1	0.0495396	251.385	249.397	190.348	245.727	191.855	148.157	41.815	35.4124	36.1303	44.8725	39.5521	40.6497	230.377	7.84785	195.246	7.60915	37.7859	5.23978	41.6914	5.38168	-0.238699	0.141902
Dffa	-0.358905	1	0.0496928	21.5313	23.4761	26.1205	16.2238	20.1009	16.9224	15.9368	16.6422	14.9657	14.5876	15.2898	15.8607	23.7093	4.56738	17.749	4.14967	15.8482	3.98625	15.246	3.93036	-0.417711	-0.0558864
Mrpl37	-0.300363	1	0.0497629	72.7031	83.3255	90.0509	58.8798	68.2636	60.7823	38.8337	40.5892	38.2312	36.0413	37.0801	37.7171	82.0265	6.35802	62.6419	5.96906	39.218	5.29345	36.9462	5.20735	-0.388962	-0.0860926
Dnajc13	-0.327962	1	0.0499292	108.775	114.047	98.7096	99.166	95.9273	94.109	34.0852	31.0814	35.871	39.6478	34.9858	39.1297	107.177	6.74386	96.4007	6.59097	33.6792	5.07378	37.9211	5.24493	-0.152883	0.171143
Utp20	-0.364763	1	0.0500097	302.417	298.523	240.713	290.024	240.216	266.786	37.3918	31.9544	35.1447	43.6472	39.7467	43.4979	280.551	8.13212	265.675	8.05352	34.8303	5.12227	42.2973	5.40249	-0.0785973	0.280221
Alg6	-0.288029	1	0.0503666	36.2117	43.9089	45.747	31.3539	34.4303	40.9245	9.65963	10.7083	10.8158	9.73278	10.815	12.0606	41.9559	5.3908	35.5696	5.15257	10.3946	3.37776	10.8695	3.44221	-0.238229	0.0644509
Adgre5	-0.353492	1	0.0504534	215.313	208.821	228.302	199.243	193.049	158	29.0006	27.3846	26.6633	30.9784	29.0919	29.0881	217.479	7.76473	183.431	7.51909	27.6828	4.79092	29.7195	4.89334	-0.24564	0.102418
Hif3a	-0.207692	1	0.0505295	141.212	136.799	173.752	117.942	130.358	135.551	64.2457	68.4718	73.1166	63.7832	63.3223	75.8794	150.587	7.23446	127.95	6.99944	68.6114	6.10038	67.6617	6.08027	-0.235018	-0.0201091
Cdca3	0.284723	1	0.0505709	45.1598	47.097	51.0866	52.4996	54.9293	49.5583	27.0491	29.3762	26.1964	23.8349	25.4182	25.0884	47.7811	5.57837	52.3291	5.70954	27.5406	4.78349	24.7805	4.63113	0.131172	-0.152354
Sapcd1	0.353556	1	0.0507162	471.731	481.404	628.191	558.355	582.33	633.379	174.383	197.763	179.536	144.766	174.036	168.986	527.109	9.04196	591.355	9.20788	183.894	7.52273	162.596	7.34515	0.165924	-0.17758
Slc12a2	-0.311851	1	0.0508069	53.5486	50.7199	45.3141	47.9424	39.2068	41.0971	13.259	11.1107	12.5795	14.3795	11.3415	13.4194	49.8608	5.63984	42.7488	5.41781	12.3164	3.62251	13.0468	3.70562	-0.222025	0.083118
Tsnax	-0.214729	1	0.0508792	106.398	103.179	109.244	88.7754	92.5439	86.3385	127.299	129.154	123.875	122.85	121.735	125.742	106.274	6.73164	89.2193	6.47928	126.776	6.98614	123.442	6.94769	-0.252358	-0.0384483
Acaca	-0.402695	1	0.0509104	85.7057	89.5568	66.6723	79.114	62.8901	72.0063	25.6289	22.6716	25.2108	31.7182	25.0176	29.1265	80.6449	6.33351	71.3368	6.15657	24.5038	4.61493	28.6208	4.83899	-0.176937	0.224059
Ufm1	0.326612	1	0.0510624	56.7643	46.9521	55.7045	61.7964	65.8754	65.79	48.3849	48.3647	43.0555	44.8494	47.2314	43.2983	53.1403	5.73174	64.4873	6.01094	46.6017	5.54231	45.1263	5.4959	0.279207	-0.0464129
Cript	0.345759	1	0.0511359	30.4794	31.8811	29.2954	34.8175	33.6342	45.0687	19.3735	19.6637	18.1819	18.8182	19.1123	18.2866	30.5519	4.93319	37.8401	5.24185	19.073	4.25346	18.739	4.22798	0.308653	-0.0254861
Pbrm1	-0.365695	1	0.051275	150.579	134.045	110.399	143.463	125.979	114.83	44.959	37.138	39.58	51.623	47.3	52.787	131.675	7.04083	128.091	7.00102	40.559	5.34195	50.57	5.66021	-0.039811	0.31826
Smg7	-0.326552	1	0.0513499	84.1678	85.934	69.5585	74.1922	67.4675	56.6381	36.1233	32.8752	33.2773	36.2725	33.8299	35.414	79.8868	6.31988	66.0993	6.04656	34.0919	5.09136	35.1721	5.13636	-0.273322	0.0450028
Dpy30	0.314488	1	0.0513866	26.5646	33.1853	32.1816	32.2654	40.998	34.3627	28.0791	30.3788	28.2714	27.4413	27.73	26.4933	30.6438	4.93753	35.8754	5.16492	28.9098	4.85349	27.2215	4.76668	0.227396	-0.086808
Wbp11	-0.29758	1	0.0513866	91.1585	87.9628	76.9185	79.4786	74.2342	64.4085	37.0557	33.5982	34.1851	36.5962	35.7754	36.7805	85.3466	6.41526	72.7071	6.18402	34.9463	5.12707	36.384	5.18523	-0.231237	0.058166
Hsp90aa1	-0.315419	1	0.0514361	604.973	616.899	573.93	557.809	532.177	534.09	451.26	433.4	481.729	498.498	496.313	541.804	598.601	9.22545	541.359	9.08044	455.463	8.83119	512.205	9.00058	-0.145009	0.169388
Lsm12	-0.296998	1	0.0515271	105.839	102.889	92.2156	83.6713	73.4381	89.1014	24.2521	23.4491	24.4846	24.6672	23.301	24.5817	100.314	6.64839	82.0702	6.35879	24.0619	4.58868	24.1833	4.59594	-0.289598	0.00725797
Pnpt1	-0.332704	1	0.0517922	118.422	127.959	105.925	120.859	105.878	101.879	28.6103	29.0625	29.5683	34.1456	33.0631	35.0455	117.435	6.87572	109.539	6.7753	29.0803	4.86197	34.0847	5.09105	-0.100427	0.229082
Tagln2	-0.160488	1	0.0525624	1308.38	1383.2	1495.51	1097.02	1231.53	1232.05	176.735	202.216	194.917	166.844	188.273	190.528	1395.7	10.4468	1186.87	10.2129	191.29	7.57961	181.882	7.50686	-0.233825	-0.0727581
Dtl	-0.208401	1	0.0527693	152.816	141.291	146.333	151.848	132.547	138.832	33.0769	30.3243	34.0554	36.6424	32.0217	39.3062	146.813	7.19784	141.076	7.14033	32.4855	5.02172	35.9901	5.16953	-0.0575137	0.147803
Rps24	-0.344372	1	0.052797	261.172	271.134	265.535	216.379	215.538	218.264	368.172	376.714	432.812	412.429	433.368	372.227	265.947	8.05499	216.727	7.75973	392.566	8.61679	406.008	8.66536	-0.29526	0.0485739
Gak	-0.302618	1	0.0530437	93.5353	89.267	83.4125	76.7443	76.8214	68.8981	43.1919	43.7881	43.9115	45.5429	41.738	47.4208	88.7383	6.47148	74.1546	6.21246	43.6305	5.44726	44.9006	5.48866	-0.25902	0.0413981
Zfp706	0.594811	1	0.0530437	8.66844	8.11518	15.73	12.2135	15.3245	16.4043	120.718	114.654	109.999	109.534	104.213	96.8683	10.8379	3.43801	14.6474	3.87257	115.124	6.84704	103.539	6.69403	0.434563	-0.153016
Nnt	-0.355822	1	0.0530707	31.3182	36.0836	34.202	31.3539	27.6637	28.1464	10.0391	8.91449	11.7236	11.0968	10.4831	11.6614	33.8679	5.08185	29.0547	4.8607	10.2257	3.35413	11.0804	3.46994	-0.221151	0.115812
Smad2	-0.258411	1	0.0531772	96.4714	87.0933	84.1341	83.3067	82.991	73.2151	27.9056	25.5226	24.303	29.4064	26.6199	27.023	89.2329	6.4795	79.8376	6.319	25.9104	4.69546	27.6831	4.79093	-0.160508	0.0954736
Taf1c	0.323376	1	0.0532142	33.1358	29.7074	27.275	40.833	37.6146	35.3988	16.4788	17.2492	14.6804	16.1365	16.1939	16.4748	30.0394	4.90878	37.9488	5.24598	16.1361	4.01222	16.2684	4.024	0.337199	0.0117793
Ppp3r1	-0.205407	1	0.0532762	150.02	162.014	158.311	141.64	129.362	141.941	51.5831	49.8993	53.0413	55.4144	50.6991	50.5453	156.781	7.29261	137.648	7.10484	51.5079	5.68672	52.2196	5.70652	-0.187776	0.0197978
Tmem147	0.374414	1	0.0532896	131.565	147.667	161.774	137.629	172.55	166.806	49.6641	66.2755	56.7244	49.3343	49.1426	44.5036	147.002	7.19969	158.995	7.31284	57.5547	5.84686	47.6602	5.57471	0.113145	-0.27215
Tbk1	-0.280649	1	0.053294	93.2557	89.4119	82.691	82.3953	84.7822	79.0861	14.1696	14.18	13.8504	17.6161	15.0037	15.1314	88.4528	6.46684	82.0878	6.3591	14.0667	3.81421	15.9171	3.9925	-0.10774	0.178293
Cyp20a1	-0.263342	1	0.0532954	82.2104	80.862	75.331	77.2911	72.0449	66.308	12.7711	11.936	12.2423	13.4779	13.2756	13.0509	79.4678	6.3123	71.8814	6.16755	12.3165	3.62252	13.2681	3.72989	-0.144753	0.107378
Hsp90ab1	-0.280699	1	0.0533569	3941.07	3940.93	3863.38	3593.85	3637.47	3405.54	886.366	922.885	938.403	925.03	1017.31	1082.14	3915.13	11.9348	3545.62	11.7918	915.885	9.83902	1008.16	9.97751	-0.143021	0.138488
Asap1	-0.346321	1	0.0534249	242.017	235.485	205.789	203.436	198.024	168.187	111.536	103.461	108.78	122.873	105.232	114.955	227.764	7.8314	189.883	7.56896	107.926	6.75389	114.354	6.83736	-0.262432	0.0834636
Gdap2	-0.348413	1	0.0534572	34.6738	41.0106	33.4805	27.5258	30.848	29.5278	9.78972	10.2445	11.3604	11.1892	10.2657	10.6096	36.3883	5.1854	29.3005	4.87286	10.4649	3.38748	10.6882	3.41794	-0.312547	0.0304591
Psmd10	0.305467	1	0.0534572	91.8575	77.8188	79.3718	98.2545	101.699	97.3899	18.1809	19.6569	17.1703	17.2462	17.9106	17.9642	83.016	6.37532	99.1144	6.63102	18.3361	4.19661	17.707	4.14625	0.255705	-0.0503635
Dgcr8	-0.311683	1	0.0536147	51.731	56.0817	48.2003	45.3903	44.9783	41.7878	18.5062	17.447	19.1416	19.1419	18.2425	20.2135	52.0043	5.70056	44.0522	5.46114	18.3649	4.19888	19.1993	4.26298	-0.239419	0.0641024
Optn	-0.314274	1	0.0536147	81.6511	81.1518	94.9575	71.6401	80.8018	73.3878	20.8696	21.7031	21.839	20.4828	23.5527	26.3244	85.9201	6.42492	75.2766	6.23413	21.4705	4.42429	23.4533	4.55172	-0.190796	0.127432
Uhrf1bp1	-0.304886	1	0.0536147	45.5792	36.9531	41.129	39.557	30.2509	29.1824	22.9511	20.9733	22.3318	22.5634	20.314	22.3631	41.2204	5.36529	32.9968	5.04425	22.0854	4.46502	21.7468	4.44273	-0.321034	-0.0222886
Ctnnb1	-0.176377	1	0.0536275	618.955	554.586	558.2	594.814	531.779	516.477	99.3825	92.9917	91.48	101.766	97.9876	103.877	577.247	9.17304	547.69	9.09722	94.6181	6.56404	101.211	6.66122	-0.0758288	0.0971713
Mapk6	0.309281	1	0.0536941	38.5885	37.6776	34.0577	43.932	40.998	41.7878	48.374	38.9728	40.8509	46.144	36.4278	36.5732	36.7746	5.20064	42.2393	5.40051	42.7326	5.41726	39.715	5.31161	0.199874	-0.105652
C2cd3	-0.315802	1	0.0536979	31.4581	32.6056	35.9338	24.2446	29.8529	30.0458	17.4437	16.4512	16.9369	18.1478	16.5602	18.801	33.3325	5.05886	28.0478	4.80981	16.9439	4.0827	17.8363	4.15675	-0.249043	0.0740476
Fmnl1	-0.316834	1	0.053833	27.6831	30.5768	37.6655	22.4217	30.0519	25.0382	12.9554	13.7776	15.1732	12.4376	13.9279	15.7148	31.9751	4.99888	25.8373	4.69138	13.9687	3.80413	14.0268	3.81011	-0.307498	0.00598526
2002-09-01	-0.185473	1	0.0538418	387.563	382.573	360.348	354.919	326.391	354.506	82.3724	80.8034	89.1198	85.6993	84.5061	91.9167	376.828	8.55776	345.272	8.43159	84.0985	6.39401	87.374	6.44913	-0.126171	0.0551237
Wsb2	-0.586219	1	0.0538894	8.10919	6.66604	5.48387	5.83329	3.58235	2.59016	35.1151	36.0604	33.5626	32.9435	31.2549	28.735	6.75303	2.75554	4.00193	2.0007	34.9127	5.12568	30.9778	4.95316	-0.754839	-0.172517
Shcbp1	-0.23061	1	0.0541114	123.735	127.09	130.458	116.666	117.421	121.219	15.8717	16.0147	16.1847	16.3215	17.2354	18.9929	127.094	6.98976	118.435	6.88796	16.0237	4.00214	17.5166	4.13065	-0.101798	0.128513
Rreb1	-0.346747	1	0.054694	46.2783	50.575	58.0135	44.2966	32.6391	38.3343	20.2625	18.8794	20.179	19.2575	16.5945	20.5897	51.6223	5.68992	38.4233	5.26391	19.7736	4.3055	18.8139	4.23373	-0.426011	-0.0717779
Manbal	0.437469	1	0.0550615	10.6258	9.41941	8.37011	12.0312	9.75194	11.5694	17.0317	16.2807	14.3951	16.0441	14.1568	11.7151	9.47178	3.24364	11.1175	3.47476	15.9025	3.99118	13.972	3.80447	0.231123	-0.186717
Uqcrc2	-0.175802	1	0.0552051	548.768	610.522	523.276	514.606	536.158	508.879	104.109	106.79	102.374	104.379	112.259	111.393	560.856	9.13149	519.881	9.02204	104.424	6.70631	109.344	6.77273	-0.109448	0.0664131
Cux1	0.299322	1	0.0553295	44.6005	45.3581	40.6961	44.4789	48.9587	56.6381	28.2959	28.6532	28.6345	26.979	26.0248	27.0614	43.5516	5.44465	50.0252	5.64458	28.5279	4.8343	26.6884	4.73814	0.199931	-0.0961607
Lpl	-0.331048	1	0.0553417	542.057	518.502	574.652	492.002	447.196	414.425	84.2697	81.4922	89.1716	88.1036	84.4145	92.9838	545.07	9.0903	451.208	8.81765	84.9779	6.40901	88.5006	6.46762	-0.272651	0.0586007
Mapk7	0.343353	1	0.0554212	17.0573	19.1286	18.1834	19.1405	22.8872	17.7857	13.8661	13.7776	12.9945	11.4435	11.7764	11.8379	18.1231	4.17976	19.9378	4.31744	13.546	3.7598	11.6859	3.5467	0.137679	-0.213096
Txndc17	-0.360395	1	0.0555248	88.6418	106.077	115.306	85.1296	72.443	85.9932	24.9784	27.2618	28.427	28.343	27.1921	26.048	103.341	6.69128	81.1886	6.34321	26.8891	4.74895	27.1944	4.76524	-0.34807	0.0162863
Prkcsh	-0.352783	1	0.0557434	413.569	390.543	449.677	369.138	332.163	298.386	64.9613	66.3301	65.932	62.951	70.3607	67.2428	417.93	8.70712	333.229	8.38037	65.7411	6.03872	66.8515	6.06289	-0.326746	0.0241632
Polr1c	-0.195875	1	0.0558949	245.652	237.224	241.867	238.436	221.508	206.349	40.4165	41.6464	41.5771	44.5026	44.4275	41.0566	241.581	7.91637	222.098	7.79505	41.2133	5.36504	43.3289	5.43726	-0.121314	0.0722175
Pik3cb	-0.335566	1	0.0560128	40.6858	43.1844	33.4805	34.0883	31.6441	28.6644	21.8344	19.9229	20.5422	22.5403	19.3984	21.0964	39.1169	5.28972	31.4656	4.9757	20.7665	4.37619	21.0117	4.39312	-0.314016	0.0169338
Kalrn	0.333451	1	0.0560357	150.859	144.769	158.455	161.874	176.132	180.966	28.3501	29.6354	27.597	23.7424	25.7501	28.3051	151.361	7.24185	172.99	7.43455	28.5275	4.83428	25.9325	4.69669	0.1927	-0.137591
Yme1l1	-0.331436	1	0.0563167	545.133	585.018	469.737	506.403	466.899	459.148	81.7545	75.5447	77.2406	90.1842	85.7649	88.2164	533.296	9.05879	477.483	8.89931	78.1799	6.28873	88.0552	6.46034	-0.159485	0.17161
Nhp2l1	-0.438274	1	0.0563745	67.53	79.8476	78.6502	50.3121	67.2685	49.731	48.3307	50.5814	57.7619	57.0558	52.6675	46.7299	75.3426	6.23539	55.7705	5.80143	52.2246	5.70666	52.1511	5.70462	-0.433962	-0.00203385
Gnl1	-0.316452	1	0.0564761	43.6218	34.1997	35.0679	32.63	27.2656	24.8655	40.59	37.7314	39.6059	39.1854	35.5923	35.2374	37.6298	5.2338	28.2537	4.82037	39.3091	5.29679	36.6717	5.1966	-0.413436	-0.100195
Rsl24d1	-0.594043	1	0.0564823	4.89348	7.82535	7.79286	3.46352	5.77156	4.83496	45.7287	50.9633	51.4332	52.1547	52.3471	48.4342	6.83723	2.77341	4.69001	2.22959	49.3751	5.62571	50.9787	5.67182	-0.543821	0.0461098
Med26	-0.339202	1	0.0566499	20.972	16.81	17.8947	18.0467	19.3049	15.5409	13.9528	11.6495	11.1011	16.0672	13.9737	13.857	18.5589	4.21404	17.6308	4.14003	12.2345	3.61288	14.6326	3.87112	-0.0740113	0.258237
Hmgb2	0.36833	1	0.0566771	46.1385	51.5894	44.5925	52.4996	60.3028	63.5452	237.425	230.147	219.194	210.607	225.319	224.314	47.4401	5.56804	58.7825	5.87732	228.922	7.83871	220.08	7.78188	0.30928	-0.0568276
Ppp2r1a	-0.178437	1	0.0566856	553.522	524.878	472.19	464.294	460.331	445.507	85.5923	80.5578	76.255	80.3127	81.0384	80.7543	516.863	9.01364	456.711	8.83514	80.8017	6.33631	80.7018	6.33453	-0.178503	-0.00178465
Adat2	-0.342861	1	0.0567424	41.5246	42.3149	46.0356	34.2706	35.2264	33.8447	11.2858	10.0876	9.75234	11.929	10.4488	9.28917	43.2917	5.43602	34.4472	5.10632	10.3753	3.37508	10.5557	3.39995	-0.329703	0.0248688
Mtmr12	-0.279515	1	0.0568405	61.6578	61.7333	62.4872	52.6819	53.7352	51.1124	28.0682	25.0929	24.9774	26.8865	25.7844	27.6142	61.9595	5.95325	52.5098	5.71452	26.0462	4.703	26.7617	4.7421	-0.238737	0.0390983
Atp5b	-0.139221	1	0.0572934	4250.47	4643.77	4344.38	4087.13	4190.55	3856.74	860.737	879.165	843.629	868.113	895.107	845.076	4412.87	12.1075	4044.81	11.9819	861.177	9.75017	869.432	9.76393	-0.125647	0.0137634
Pck2	-0.258413	1	0.0576033	119.541	114.192	107.368	114.661	95.1312	99.462	26.9732	24.1926	24.6402	27.9037	27.2608	26.7159	113.7	6.82909	103.085	6.68769	25.2687	4.65928	27.2935	4.77048	-0.141408	0.111206
Rnf115	-0.324904	1	0.0577482	40.5459	43.3293	42.5721	30.8071	41.396	31.0819	25.0977	24.1107	22.9802	24.043	24.7887	24.6585	42.1491	5.39743	34.4283	5.10552	24.0629	4.58874	24.4967	4.61452	-0.291907	0.0257801
Sec11c	0.196632	1	0.0578468	156.312	167.81	164.805	179.556	191.655	187.355	62.9231	68.9901	71.6901	66.5574	70.9901	65.1623	162.976	7.34851	186.189	7.54062	67.8678	6.08465	67.57	6.07831	0.19211	-0.00634448
Ndufs2	-0.18721	1	0.0579732	259.214	299.102	264.669	243.358	255.939	239.848	93.2138	93.8443	90.7279	96.9348	96.2595	91.195	274.328	8.09976	246.382	7.94475	92.5953	6.53287	94.7964	6.56676	-0.15501	0.0338937
Gpn3	-0.210076	1	0.0579752	144.288	136.654	136.519	121.952	117.222	108.269	28.3718	28.6464	27.623	27.3951	26.6771	27.2533	139.154	7.12053	115.814	6.85567	28.2137	4.81833	27.1085	4.76067	-0.264864	-0.0576511
Ccdc23	0.462449	1	0.0579944	7.82956	13.3321	14.1426	15.3124	11.7421	14.3322	29.4125	30.8426	27.9861	25.6381	25.9446	24.313	11.7681	3.55681	13.7956	3.78613	29.4138	4.87842	25.2986	4.66099	0.229326	-0.217433
Mff	-0.302634	1	0.0581673	58.0226	67.385	52.3854	44.6611	46.9685	45.9321	38.465	38.3385	37.8422	38.3763	36.5651	34.7614	59.2643	5.88909	45.8539	5.51897	38.2152	5.25608	36.5676	5.19249	-0.370119	-0.0635814
Utp11l	-0.329099	1	0.0581697	159.527	182.157	174.907	140.91	157.225	149.538	26.9841	27.9234	31.6692	30.6317	32.777	30.6389	172.197	7.42792	149.225	7.22134	28.8589	4.85094	31.3492	4.97036	-0.206573	0.119412
Gfpt1	-0.262262	1	0.058295	86.1252	94.9186	95.5347	77.838	82.792	90.4828	20.0998	21.6076	24.718	23.072	22.7974	26.2323	92.1928	6.52658	83.7043	6.38723	22.1418	4.4687	24.0339	4.587	-0.139354	0.118297
Mtmr3	-0.357325	1	0.058771	75.9188	72.8917	79.5161	66.1714	64.4822	49.3856	37.3701	37.2267	36.8306	35.5327	36.3477	40.2428	76.1089	6.24999	60.0131	5.90721	37.1425	5.215	37.3744	5.22398	-0.342787	0.00898082
Ascc2	-0.259134	1	0.0592918	76.0586	75.2103	79.5161	65.0777	69.6567	69.2435	13.8986	14.5756	14.1098	14.4258	14.7519	15.9682	76.9283	6.26544	67.9926	6.08731	14.1946	3.82727	15.0486	3.91156	-0.178137	0.0842851
3110062M04Rik	0.396746	1	0.0593681	15.7989	17.8244	23.5229	17.3176	18.7078	28.6644	25.3037	28.36	28.7123	21.1994	24.4111	25.9022	19.0488	4.25162	21.5633	4.4305	27.4587	4.77919	23.8376	4.57516	0.178879	-0.204024
Snx2	-0.209076	1	0.0595124	129.328	126.8	130.025	122.499	121.8	111.377	30.8761	30.0583	29.6201	31.8338	31.4723	32.9113	128.718	7.00806	118.559	6.88946	30.1848	4.91575	32.0725	5.00326	-0.118609	0.0875113
Fam73a	-0.372311	1	0.0599063	26.5646	25.215	30.7385	20.9634	24.2803	19.6852	17.216	14.6574	14.3691	16.5527	14.3285	16.2368	27.506	4.78168	21.643	4.43583	15.4142	3.94619	15.706	3.97324	-0.34585	0.0270559
Stradb	0.39814	1	0.0601122	10.7656	9.70923	11.4007	12.2135	11.5431	14.1595	11.3075	11.9769	11.4901	10.5188	10.506	10.7017	10.6252	3.40942	12.6387	3.65978	11.5915	3.535	10.5755	3.40266	0.25036	-0.132341
Traf7	-0.285022	1	0.0603634	96.3316	93.3246	104.338	72.3693	80.8018	71.143	52.6021	55.1512	56.0241	51.2531	49.1426	51.7276	97.998	6.61468	74.7713	6.22441	54.5925	5.77063	50.7078	5.66414	-0.390267	-0.106495
Rnps1	0.464716	1	0.060441	24.4674	17.5346	17.3175	21.5103	26.0715	32.4633	41.9993	44.3678	41.7327	40.0408	42.2187	42.9067	19.7731	4.30547	26.6817	4.73778	42.7	5.41616	41.7221	5.38274	0.432308	-0.0334243
Lpin1	0.291503	1	0.0605283	27.6831	21.5922	25.9762	29.7133	30.4499	29.8731	17.2811	15.5646	17.4556	16.3215	15.2898	17.2963	25.0838	4.64869	30.0121	4.90747	16.7671	4.06756	16.3025	4.02702	0.258788	-0.0405374
Sltm	-0.350876	1	0.0605283	171.691	182.012	145.322	153.306	145.284	143.667	37.0882	37.5541	36.9603	38.908	41.8639	45.2482	166.342	7.37801	147.419	7.20378	37.2009	5.21726	42.0067	5.39255	-0.174227	0.175283
Fgfr1op2	-0.3882	1	0.0605308	17.3369	22.1718	24.1002	14.0364	17.9117	17.9584	47.0297	45.7047	44.9749	46.3289	47.8952	47.6588	21.203	4.40619	16.6355	4.05619	45.9031	5.52052	47.2943	5.56359	-0.35	0.0430751
Clpb	-0.316575	1	0.0606128	31.1784	34.9243	30.3056	27.8904	28.2607	23.1387	16.7607	15.7692	15.7438	16.0209	16.2283	16.8357	32.1361	5.00612	26.43	4.7241	16.0912	4.0082	16.3616	4.03224	-0.28202	0.0240417
Cep83	-0.473437	1	0.0607641	7.41012	11.8829	10.2462	7.6562	7.36371	6.90708	10.5486	10.7833	10.9195	10.2876	10.9409	12.1143	9.84641	3.2996	7.309	2.86967	10.7505	3.42633	11.1143	3.47434	-0.429925	0.0480128
Emc1	-0.368923	1	0.0608496	287.597	264.903	294.397	254.295	214.941	201.687	15.1453	15.1621	18.7006	16.7376	15.4043	17.7953	282.299	8.14108	223.641	7.80504	16.336	4.02999	16.6457	4.05708	-0.336039	0.0270931
Dpp8	-0.341515	1	0.0610479	59.98	69.4138	69.9915	53.2288	59.7058	48.0042	50.3038	49.2173	50.8885	53.1488	47.0826	53.4396	66.4618	6.05445	53.6463	5.74541	50.1365	5.64779	51.2237	5.67874	-0.309047	0.0309483
Polr2f	0.493735	1	0.0610557	426.292	334.172	565.56	524.814	540.337	673.441	72.8754	70.0268	73.4019	74.1864	69.3993	58.4757	442.008	8.78793	579.531	9.17874	72.1014	6.17196	67.3538	6.07369	0.390813	-0.0982676
Tacc3	-0.189842	1	0.061447	249.707	258.961	248.65	241.352	241.211	213.947	45.1975	46.148	45.8308	47.5773	48.9252	46.9909	252.439	7.97979	232.17	7.85904	45.7254	5.51493	47.8311	5.57988	-0.120755	0.0649526
Ncoa5	-0.26995	1	0.0616077	101.505	101.15	87.3089	91.3275	84.9812	87.2019	27.8405	26.9686	28.1158	30.4236	31.0145	29.2877	96.6545	6.59477	87.8369	6.45675	27.6416	4.78877	30.242	4.91848	-0.13801	0.129709
Jmjd6	-0.283208	1	0.0616285	106.398	98.3966	111.409	87.3171	101.5	95.6631	30.4967	31.6748	30.2945	34.2612	34.322	32.7117	105.401	6.71975	94.8267	6.56722	30.822	4.94589	33.765	5.07746	-0.152528	0.131568
Ptp4a2	-0.426291	1	0.0618066	19.5739	26.0845	25.1103	14.9478	18.1107	18.8218	199.285	190.505	196.499	196.297	186.453	195.641	23.5896	4.56008	17.2935	4.11215	195.43	7.61051	192.797	7.59094	-0.447924	-0.0195696
Nol9	-0.188685	1	0.0618811	252.643	261.28	238.548	228.41	247.978	221.545	68.3871	64.3931	65.1539	74.1402	68.9187	66.168	250.824	7.97053	232.644	7.86198	65.978	6.04391	69.7423	6.12396	-0.108549	0.080048
R3hdm1	-0.309294	1	0.0618811	69.2077	74.051	62.7759	62.161	57.3175	49.731	67.3138	64.6659	66.0358	69.4934	63.6542	67.8416	68.6782	6.10178	56.4032	5.8177	66.0052	6.04451	66.9964	6.06601	-0.284076	0.021505
Cox6a1	0.363703	1	0.0619263	188.469	188.823	226.57	198.697	216.135	266.959	177.592	175.377	177.928	155.193	163.839	145.763	201.287	7.65311	227.263	7.82822	176.966	7.46733	154.932	7.27549	0.175109	-0.191839
Tex10	-0.338489	1	0.0623864	167.497	154.623	118.192	155.311	145.284	117.42	30.9303	27.4733	25.4443	35.0241	32.6511	32.4737	146.771	7.19742	139.339	7.12245	27.9493	4.80474	33.383	5.06104	-0.0749673	0.256301
Tmem185b	-0.327195	1	0.0624887	28.1025	27.8235	28.1409	22.7863	28.2607	21.0666	9.58374	10.9334	11.0492	11.3511	11.2843	11.0472	28.0223	4.8085	24.0379	4.58724	10.5221	3.39535	11.2275	3.48897	-0.221266	0.0936139
Paip1	-0.307671	1	0.0627162	53.968	58.1105	62.3429	44.1143	53.5362	41.7878	21.184	21.2666	23.3693	21.3381	21.1723	22.3247	58.1405	5.86147	46.4794	5.53852	21.9399	4.45549	21.6117	4.43374	-0.322951	-0.0217464
Srgap2	-0.3096	1	0.062765	29.7803	31.7361	32.326	26.4321	24.6784	27.1103	12.3483	12.4271	13.8245	11.8365	12.6233	15.331	31.2808	4.96721	26.0736	4.70452	12.8666	3.68556	13.2636	3.7294	-0.262688	0.0438392
Csk	-0.328431	1	0.0628503	169.874	185.345	197.996	133.619	147.672	128.644	120.491	123.575	123.253	114.065	114.765	112.813	184.405	7.52673	136.645	7.09429	122.44	6.93593	113.881	6.83139	-0.432443	-0.104538
Ltv1	-0.334642	1	0.0630245	237.264	272.438	215.603	202.707	219.518	212.565	35.0934	36.456	33.7441	35.6021	40.3761	40.4271	241.768	7.91748	211.597	7.72517	35.0978	5.13331	38.8018	5.27805	-0.192306	0.14474
Mcu	-0.304727	1	0.0630655	26.8442	34.1997	33.7691	21.8748	29.0568	26.2469	9.06335	9.91712	11.0233	9.47848	10.0139	10.5482	31.6043	4.98205	25.7262	4.68517	10.0012	3.32211	10.0135	3.32388	-0.296884	0.00177155
Homer1	-0.357192	1	0.0631862	22.3702	26.2294	27.275	18.4113	21.2951	18.8218	20.5985	19.3636	19.2453	21.5462	18.4142	18.7242	25.2915	4.66058	19.5094	4.2861	19.7358	4.30274	19.5615	4.28995	-0.374486	-0.0127978
Rpl6	-0.38855	1	0.0633953	101.784	88.1077	93.9473	85.4942	74.6322	58.8829	375.641	402.127	369.318	348.669	411.704	391.703	94.6131	6.56397	73.0031	6.18989	382.362	8.5788	384.025	8.58506	-0.374082	0.00626187
Dnajc10	-0.310891	1	0.0637239	61.6578	72.6019	67.8268	54.8694	56.5215	55.4293	23.3414	23.1286	25.5739	26.2854	23.2094	24.267	67.3622	6.07387	55.6067	5.79719	24.0146	4.58584	24.5873	4.61984	-0.276679	0.0339979
Fam178b	0.43768	1	0.0640209	14.5406	18.6939	19.9151	18.229	18.1107	19.8579	15.4164	18.0404	17.4297	9.80213	14.3399	16.2676	17.7165	4.14702	18.7325	4.22748	16.9622	4.08425	13.4699	3.75166	0.0804507	-0.332584
Rnmtl1	-0.278212	1	0.0640546	66.1318	71.4426	68.2597	68.3589	65.0793	64.2359	11.4268	12.5567	12.372	12.6226	15.5073	14.0566	68.6114	6.10038	65.8913	6.04202	12.1185	3.59914	14.0621	3.81374	-0.0583587	0.214608
Ttc27	-0.194263	1	0.0640546	219.927	221.573	215.025	224.035	219.12	205.658	27.4177	27.6097	28.012	30.2849	30.8314	32.3892	218.842	7.77374	216.271	7.7567	27.6798	4.79076	31.1685	4.96202	-0.0170474	0.171255
Hdlbp	-0.324657	1	0.0646241	542.896	545.021	449.966	480.335	456.351	413.907	123.656	119.074	122.19	135.912	128.132	137.127	512.628	9.00177	450.198	8.81441	121.64	6.92647	133.724	7.06311	-0.187353	0.13664
Cnot7	-0.311325	1	0.0646544	30.759	32.6056	32.9032	27.1613	26.4696	21.93	37.8363	32.7251	33.4848	36.573	32.5824	31.7981	32.0893	5.00402	25.1869	4.6546	34.682	5.11612	33.6512	5.07259	-0.349416	-0.0435309
Map4k5	-0.362404	1	0.0649164	22.6498	24.9252	17.6061	20.7811	15.7225	16.577	11.0473	10.3877	10.1673	12.4607	10.3458	10.3793	21.727	4.44142	17.6935	4.14515	10.5341	3.397	11.0619	3.46753	-0.296268	0.0705343
Lsm2	0.51359	1	0.0650498	156.591	204.763	250.526	165.155	266.089	359.514	56.7327	62.9812	62.249	50.9295	56.5472	54.7216	203.96	7.67214	263.586	8.04213	60.6543	5.92254	54.0661	5.75665	0.369985	-0.165885
Ppp6r2	-0.289055	1	0.0650498	39.4274	30.1421	31.7487	30.4425	25.2754	21.7573	18.7772	15.3804	16.2885	17.3387	13.9966	15.4768	33.7727	5.07779	25.8251	4.6907	16.8154	4.07171	15.604	3.96385	-0.387087	-0.10786
Asxl1	0.202789	1	0.0651737	118.142	101.73	109.1	151.119	118.018	127.608	44.1025	39.5525	42.5627	45.173	41.5892	45.0102	109.657	6.77686	132.248	7.04711	42.0726	5.39481	43.9242	5.45694	0.270248	0.0621341
Heatr6	-0.275452	1	0.0652386	44.3209	42.7496	44.3039	38.281	42.7891	36.9529	14.2889	14.9439	15.5104	15.0037	16.1367	17.1427	43.7915	5.45258	39.341	5.29796	14.9144	3.89863	16.0944	4.00849	-0.154616	0.109855
Unc13d	-0.289138	1	0.0655086	73.5419	81.4416	97.8437	61.9787	75.6273	68.2074	33.0769	38.85	39.58	31.7182	37.5608	42.1314	84.2758	6.39705	68.6045	6.10023	37.169	5.21603	37.1368	5.21478	-0.296815	-0.00124918
Mospd1	-0.393269	1	0.0658135	15.6591	14.0567	14.1426	9.4791	8.35881	13.6415	18.2568	17.9177	16.7813	17.2462	16.4915	16.9201	14.6195	3.86982	10.4931	3.39137	17.6519	4.14175	16.8859	4.07775	-0.478445	-0.0640026
Gpi1	-0.174728	1	0.0658498	354.008	388.079	361.214	319.737	366.394	302.703	191.144	204.024	200.286	188.922	210.67	201.682	367.767	8.52265	329.612	8.36462	198.484	7.63288	200.425	7.64692	-0.158026	0.0140353
Fbxo11	-0.301835	1	0.0662375	48.6551	50.2851	44.4482	43.2028	44.9783	39.025	10.9064	11.6768	10.9454	11.5822	11.9251	12.9588	47.7961	5.57882	42.4021	5.40606	11.1762	3.48236	12.1554	3.60352	-0.17276	0.121164
Usp24	-0.328974	1	0.0662375	296.684	327.65	274.338	273.618	248.774	255.389	76.8434	71.2341	71.4826	80.6595	75.7052	82.0671	299.558	8.22669	259.26	8.01826	73.1867	6.19351	79.4773	6.31247	-0.208431	0.118962
Tle3	-0.337999	1	0.0663019	32.1571	24.6354	21.6468	24.9738	20.3	15.0229	23.4064	17.9313	16.9888	20.8758	17.4185	17.5419	26.1464	4.70854	20.0989	4.32904	19.4422	4.28112	18.6121	4.21817	-0.3795	-0.0629509
Pus1	-0.204536	1	0.0666104	123.875	124.191	135.509	107.004	105.878	109.132	38.8987	45.1522	43.3668	38.908	41.6922	42.83	127.858	6.9984	107.338	6.74602	42.4726	5.40846	41.1434	5.36259	-0.252384	-0.0458702
Plxnc1	-0.278033	1	0.0667884	43.9015	45.6479	45.8913	38.281	35.6244	41.2698	21.8453	19.2886	22.3318	21.4768	19.8447	24.029	45.1469	5.49655	38.3917	5.26272	21.1552	4.40294	21.7835	4.44517	-0.23383	0.042223
Cenpk	-0.269265	1	0.0668854	45.4394	50.7199	48.2003	48.1247	43.3862	42.9966	9.78972	9.9103	10.4267	11.3279	11.1126	11.2852	48.1199	5.58856	44.8358	5.48658	10.0422	3.32801	11.2419	3.49081	-0.101981	0.162805
Man2b1	-0.33939	1	0.0668872	174.907	175.636	221.808	145.832	152.449	154.028	22.7018	25.8295	28.5826	21.2457	25.8416	30.7003	190.783	7.57579	150.77	7.2362	25.7046	4.68396	25.9292	4.69651	-0.33959	0.012549
Uqcr11	0.349188	1	0.0668872	146.385	132.886	137.818	176.275	163.992	150.574	62.8147	73.2393	72.546	63.1128	70.3034	59.2434	139.03	7.11925	163.614	7.35415	69.5333	6.11963	64.2199	6.00495	0.2349	-0.114685
Prdx1	-0.328301	1	0.0669379	207.204	243.89	257.165	194.139	203.398	205.658	85.5706	84.4319	82.0389	88.1036	94.4742	87.7557	236.086	7.88317	201.065	7.65152	84.0138	6.39255	90.1112	6.49363	-0.231651	0.101079
Arhgap23	0.456695	1	0.0670141	7.54993	6.66604	6.78268	11.1197	5.97058	8.11582	16.0018	13.1364	14.7323	14.079	11.6963	12.6517	6.99955	2.80726	8.40204	3.07074	14.6235	3.87022	12.809	3.67908	0.263477	-0.191132
Ezh2	-0.196147	1	0.0670358	181.198	179.403	162.351	172.994	173.346	168.878	30.334	28.9943	29.9573	34.9085	31.644	34.0705	174.318	7.44558	171.739	7.42408	29.7619	4.89539	33.541	5.06785	-0.0215003	0.172461
Baz2a	-0.355225	1	0.0671746	107.656	102.019	82.5466	82.7598	75.6273	70.2796	31.4073	29.1034	28.5567	28.8747	27.627	32.2587	97.4075	6.60596	76.2222	6.25214	29.6891	4.89186	29.5868	4.88688	-0.353821	-0.00498223
Zfp598	-0.3964	1	0.0674502	31.7377	32.3158	40.8404	24.9738	31.246	20.7212	40.1238	40.371	40.1246	38.2607	37.4807	40.3119	34.9646	5.12782	25.647	4.68072	40.2065	5.32936	38.6844	5.27368	-0.447105	-0.0556749
Nudt4	-0.296924	1	0.067518	64.3142	61.1537	68.837	48.8538	51.347	44.7234	86.6223	78.2184	76.255	76.4982	72.8441	71.0736	64.7683	6.01722	48.308	5.59419	80.3652	6.3285	73.472	6.19912	-0.423024	-0.129376
Tardbp	-0.169793	1	0.067518	482.916	538.355	568.735	438.408	453.565	559.819	116.805	135.914	153.107	120.608	135.503	159.597	530.002	9.04985	483.931	8.91866	135.275	7.07975	138.569	7.11446	-0.131197	0.0347126
Uqcrq	0.338163	1	0.0679156	223.282	266.207	254.711	251.743	314.45	317.553	86.568	93.4555	93.0881	87.1326	91.2011	77.8755	248.067	7.95458	294.582	8.20253	91.0372	6.50838	85.4031	6.41622	0.247941	-0.0921692
Irf2bp1	-0.283049	1	0.0679908	46.5579	43.9089	38.9643	35.5466	36.8186	32.636	25.6506	28.1894	26.6374	26.3317	27.1349	25.7179	43.1437	5.43108	35.0004	5.1293	26.8258	4.74555	26.3948	4.72218	-0.30178	-0.0233662
Dhx33	-0.298104	1	0.0681331	74.5206	73.1815	69.4142	65.0777	70.6518	53.0119	29.998	28.9533	27.4155	32.4118	28.9774	30.47	72.3721	6.17736	62.9138	5.9753	28.7889	4.84744	30.6197	4.93639	-0.202058	0.0889474
Ubqln1	-0.334282	1	0.0684833	190.706	224.472	220.365	168.254	190.859	160.762	77.8082	77.4408	82.428	84.0348	79.7223	81.2226	211.847	7.72688	173.292	7.43706	79.2257	6.3079	81.6599	6.35156	-0.289821	0.0436593
Ppfia1	-0.305767	1	0.0687664	49.494	48.2563	55.5602	48.307	39.4058	38.1616	33.89	33.489	37.3234	34.1456	34.3563	37.5789	51.1035	5.67535	41.9581	5.39088	34.9008	5.12519	35.3603	5.14406	-0.284473	0.0188689
Kpna2	-0.430899	1	0.0688527	18.8748	20.4329	13.2767	17.4999	14.7274	13.8142	35.7114	41.8374	39.5022	42.0983	49.051	47.1368	17.5281	4.1316	15.3472	3.9399	39.017	5.28603	46.0954	5.52655	-0.191702	0.24052
Cactin	-0.325827	1	0.0690622	29.6405	26.6642	29.0068	21.328	23.2852	20.5486	38.7036	35.6853	39.1909	37.729	36.4278	34.178	28.4371	4.8297	21.7206	4.44099	37.8599	5.2426	36.1116	5.17439	-0.388713	-0.0682094
Tab2	-0.30965	1	0.0691326	41.3848	33.7649	37.3769	29.7133	34.0323	30.0458	61.4487	60.4644	65.7245	65.8176	62.258	65.1623	37.5089	5.22916	31.2638	4.96642	62.5459	5.96684	64.4126	6.00927	-0.262739	0.0424294
Llgl1	-0.305653	1	0.0692349	27.2636	27.8235	26.4092	21.1457	21.8921	17.4404	15.4381	14.2618	14.6544	13.501	13.1955	13.596	27.1654	4.7637	20.1594	4.33338	14.7848	3.88604	13.4308	3.74748	-0.430319	-0.138564
Tex30	-0.285775	1	0.0692349	54.5273	61.4435	54.1171	48.8538	49.1577	53.7026	22.1488	22.1737	22.9284	25.7999	24.4454	23.1001	56.696	5.82517	50.5714	5.66025	22.417	4.48652	24.4485	4.61167	-0.164925	0.125154
Canx	-0.287183	1	0.0692947	1969.27	1932.57	1804.91	1859.73	1768.48	1798.26	174.123	173.365	172.663	190.957	194.774	217.658	1902.25	10.8935	1808.82	10.8208	173.384	7.43782	201.129	7.65198	-0.072658	0.214156
Atp1b3	-0.295373	1	0.0696103	61.2383	63.4723	59.7453	58.1506	45.9734	51.6304	45.7071	43.945	47.9576	49.8198	47.4946	45.2252	61.4853	5.94217	51.9182	5.69817	45.8699	5.51948	47.5132	5.57026	-0.244002	0.0507808
Nop10	0.3227	1	0.0696781	195.879	224.327	265.102	234.243	268.079	293.206	84.9635	95.0925	95.8893	82.0928	87.3557	86.9573	228.436	7.83564	265.176	8.05081	91.9818	6.52328	85.4686	6.41732	0.215161	-0.105953
Ndufa10	-0.181529	1	0.0697182	252.643	287.364	271.596	238.071	258.725	242.784	64.3433	66.8689	64.713	66.0488	70.4866	66.1296	270.534	8.07967	246.527	7.9456	65.3084	6.0292	67.555	6.07799	-0.134068	0.0487939
Mmgt1	0.428541	1	0.0697618	23.9081	24.2006	38.2428	33.3591	36.6195	40.5791	21.9862	22.0373	21.0609	21.0145	19.3984	22.5166	28.7838	4.84719	36.8526	5.20369	21.6948	4.43928	20.9765	4.3907	0.356507	-0.0485753
Dhx29	-0.270878	1	0.0697632	62.3569	57.3859	61.477	55.4163	50.9489	55.084	12.2941	12.1884	14.8101	14.1021	13.1268	14.6861	60.4066	5.91663	53.8164	5.74997	13.0975	3.71122	13.9717	3.80443	-0.166661	0.0932137
Trub2	0.330806	1	0.0699242	25.8655	19.5634	23.8115	28.6196	29.8529	28.1464	14.3648	13.5252	12.0607	12.9693	13.5846	13.1353	23.0801	4.52858	28.8729	4.85165	13.3169	3.73519	13.2298	3.72571	0.323066	-0.0094719
Trmt11	-0.25432	1	0.0699301	127.23	108.975	102.173	110.468	103.291	94.109	26.0192	23.2582	24.329	28.2042	26.1278	25.2957	112.793	6.81753	102.623	6.68121	24.5354	4.6168	26.5426	4.73024	-0.136327	0.113441
Rpf2	-0.326129	1	0.0700186	255.999	291.712	239.414	237.16	241.609	228.797	38.2699	38.9932	41.4215	46.2133	45.7093	42.0699	262.375	8.03549	235.855	7.88176	39.5615	5.30603	44.6642	5.48105	-0.153727	0.17502
Tmem219	0.34943	1	0.0702172	29.6405	22.7515	31.7487	32.63	33.8333	30.5638	11.7086	12.9796	12.3201	11.0736	11.4674	10.9704	28.0469	4.80977	32.3424	5.01535	12.3361	3.62481	11.1705	3.48162	0.205584	-0.143196
Anxa6	-0.265092	1	0.0703127	61.3782	65.5011	61.1884	60.3381	59.3077	52.4938	10.6787	11.138	11.1011	11.6747	11.9824	12.3216	62.6892	5.97015	57.3799	5.84247	10.9726	3.45583	11.9929	3.58411	-0.127672	0.128275
Eif2ak1	0.316477	1	0.0704215	115.067	118.25	130.891	130.702	154.638	147.984	64.5493	67.9943	63.7274	61.0784	62.6585	63.8189	121.403	6.92365	144.441	7.17434	65.4237	6.03174	62.5186	5.96621	0.250686	-0.0655272
Ext2	-0.254264	1	0.0704818	90.0399	86.2238	94.2359	74.7391	74.8312	67.5167	36.8388	35.276	34.9372	35.8564	32.7884	33.8402	90.1666	6.49452	72.3623	6.17717	35.684	5.15721	34.1617	5.09431	-0.317353	-0.0629
Ldb1	-0.185352	1	0.0709884	240.759	206.502	211.562	184.842	182.501	177.167	107.589	106.435	103.567	100.218	98.1021	100.085	219.608	7.77878	181.503	7.50385	105.864	6.72606	99.4682	6.63616	-0.274934	-0.0899009
Stx2	0.317361	1	0.0709987	130.726	118.685	139.261	139.27	132.746	157.136	64.0614	60.2871	60.9521	57.6338	52.8392	54.0768	129.557	7.01745	143.051	7.16038	61.7669	5.94876	54.8499	5.77742	0.142936	-0.171344
Cmtm7	0.38829	1	0.0713224	17.6165	21.1574	24.2445	19.8697	19.5039	27.801	15.2971	17.0105	16.055	13.293	13.6189	12.9511	21.0061	4.39274	22.3915	4.48488	16.1209	4.01086	13.2877	3.73202	0.0921411	-0.278844
Terf2ip	-0.296112	1	0.07141	60.5393	60.7189	60.0339	49.583	49.1577	59.5736	12.3266	13.4638	15.0694	13.8941	15.2212	14.4711	60.4307	5.91721	52.7714	5.72169	13.6199	3.76765	14.5288	3.86084	-0.195525	0.0931928
Szrd1	0.420768	1	0.0714403	12.5832	10.2889	16.4516	14.2186	15.9215	16.4043	37.3592	39.9072	36.0266	31.6257	33.4408	35.5368	13.1079	3.71237	15.5148	3.95558	37.7643	5.23895	33.5344	5.06757	0.243211	-0.171381
Ccdc115	0.404682	1	0.0714692	14.9601	14.7812	19.6265	20.7811	17.5137	22.448	48.4174	50.8542	46.2199	42.5144	49.1769	44.4575	16.4559	4.04053	20.2476	4.33968	48.4972	5.59983	45.383	5.50408	0.299145	-0.0957496
Senp5	-0.291884	1	0.071569	35.9321	33.7649	32.7589	31.3539	30.848	25.7289	25.5639	27.0504	25.5999	26.9096	27.0776	27.8291	34.152	5.0939	29.3103	4.87333	26.0714	4.7044	27.2721	4.76936	-0.220563	0.06496
Alg10b	-0.329534	1	0.0716702	33.4154	31.3014	23.6672	27.8904	26.0715	20.7212	26.3011	21.3689	20.8015	27.0483	22.0535	23.1078	29.4614	4.88075	24.8944	4.63775	22.8238	4.51247	24.0699	4.58916	-0.243003	0.076688
Sympk	-0.325931	1	0.0717715	170.852	175.926	189.771	153.306	147.871	134.515	52.9816	58.7183	59.1106	55.0908	56.6731	62.2912	178.849	7.4826	145.231	7.18221	56.9368	5.83129	58.0183	5.85844	-0.300397	0.0271463
Fars2	-0.261508	1	0.0718837	44.4607	47.6767	48.6332	40.4685	40.7989	34.5354	13.9311	14.9643	14.2654	13.7322	14.6375	14.0719	46.9235	5.55224	38.6009	5.27056	14.3869	3.84669	14.1472	3.82245	-0.281676	-0.024242
Irf2bp2	-0.286043	1	0.0723922	49.0746	42.7496	52.0967	38.6456	42.7891	37.6436	35.3319	31.6816	37.3234	36.2725	32.5023	36.1894	47.9736	5.58417	39.6928	5.3108	34.779	5.12014	34.9881	5.12879	-0.273366	0.00864761
E2f2	0.308523	1	0.072415	37.7497	36.0836	35.3565	46.1195	47.7646	35.9168	51.4313	47.9145	44.1968	47.716	43.5577	45.6321	36.3966	5.18573	43.267	5.43519	47.8475	5.58037	45.6353	5.51208	0.249463	-0.0682953
Fem1c	-0.293196	1	0.0727283	91.5779	88.6873	78.9388	84.4004	74.4332	79.4315	14.5382	12.6249	12.787	15.7898	13.3443	15.8223	86.4014	6.43298	79.4217	6.31146	13.3167	3.73516	14.9854	3.90549	-0.121521	0.170325
Rrm2	-0.179789	1	0.0728006	272.916	295.479	314.312	236.795	267.283	279.219	69.5146	73.8259	83.9324	74.9031	73.2676	79.6488	294.236	8.20083	261.099	8.02845	75.7576	6.24332	75.9398	6.24678	-0.172377	0.00346557
Chp1	0.28441	1	0.072849	59.1411	61.4435	74.7538	66.7183	74.0351	78.05	49.0245	49.9334	49.0729	44.9418	44.3359	47.4745	65.1128	6.02487	72.9345	6.18853	49.3436	5.62479	45.5841	5.51046	0.16366	-0.114333
Ermp1	-0.31169	1	0.0730016	143.868	159.84	160.042	127.603	131.552	134.343	29.8462	30.106	35.3003	33.4058	31.3121	35.3833	154.584	7.27224	131.166	7.03525	31.7509	4.98872	33.3671	5.06035	-0.236994	0.0716299
Lrrc8c	-0.244765	1	0.0730016	123.595	117.38	120.068	105.182	91.9469	102.052	21.3357	18.095	19.9715	21.0376	17.7962	19.4765	120.348	6.91107	99.7269	6.63991	19.8008	4.30748	19.4368	4.28072	-0.271156	-0.0267673
Klhdc2	-0.268401	1	0.0731709	94.3742	84.0501	82.1137	70.1818	75.8263	68.3801	24.9459	23.5514	24.7699	26.4241	23.3696	22.8775	86.846	6.44039	71.4627	6.15912	24.4224	4.61013	24.2237	4.59835	-0.281268	-0.0117844
Tsn	0.176107	1	0.0731735	257.816	261.425	265.679	274.712	279.224	283.363	112.934	111.551	111.789	106.113	103.103	108.476	261.64	8.03144	279.1	8.12464	112.091	6.80853	105.897	6.72652	0.0931967	-0.0820061
Gpx1	0.350111	1	0.0736005	1361.92	1448.12	1955	1568.43	1871.58	1969.21	888.632	951.238	950.619	861.802	859.343	761.489	1588.35	10.6333	1803.07	10.8162	930.163	9.86134	827.545	9.69269	0.182928	-0.168647
Nkap	-0.316017	1	0.0736596	61.2383	53.908	58.1579	52.6819	49.1577	49.0403	12.5217	13.3479	13.1501	12.7844	13.6533	15.7839	57.7681	5.8522	50.2933	5.65229	13.0066	3.70117	14.0739	3.81495	-0.199905	0.113777
Nudt19	0.337421	1	0.0736596	41.8043	37.9674	40.5518	38.8279	46.9685	50.9397	37.9555	36.1149	32.5251	31.9725	32.4222	31.7214	40.1078	5.32581	45.5787	5.51029	35.5318	5.15104	32.0387	5.00174	0.184476	-0.149297
Phospho1	0.475165	1	0.0737894	4.19441	8.26009	6.92699	8.38536	6.1696	8.97921	22.9728	24.3358	22.1762	20.2053	20.9434	20.5513	6.4605	2.69165	7.84472	2.97172	23.1616	4.53366	20.5667	4.36224	0.280077	-0.171425
Pfdn2	-0.193283	1	0.0738286	171.831	186.214	186.019	160.962	162.002	154.546	26.377	29.7514	29.3867	28.2967	29.3208	28.1899	181.355	7.50267	159.17	7.31442	28.505	4.83314	28.6025	4.83807	-0.188245	0.00492457
Aldh4a1	-0.289336	1	0.0739264	27.6831	26.5192	29.0068	23.88	22.0911	22.1027	11.6436	11.1312	11.5939	11.3048	10.8608	12.1834	27.7364	4.79371	22.6913	4.50407	11.4562	3.51806	11.4497	3.51723	-0.289641	-0.000823709
Rasa2	-0.282809	1	0.0739605	35.5126	33.1853	31.6044	31.3539	30.649	27.1103	11.2967	10.5787	11.0233	11.6747	11.3071	12.2295	33.4341	5.06325	29.7044	4.8926	10.9662	3.45499	11.7371	3.553	-0.170644	0.0980112
Zfp871	0.320902	1	0.0743148	62.0772	63.1825	59.3124	73.8276	66.4724	80.9855	32.2638	25.3589	27.7267	27.3951	24.846	29.4029	61.524	5.94308	73.7619	6.2048	28.4498	4.83035	27.2147	4.76631	0.261725	-0.0640352
Ncf2	0.346785	1	0.0744768	12.4434	15.5058	17.7504	17.1353	19.3049	16.577	24.0569	26.6002	26.0408	20.6677	23.9876	25.4185	15.2332	3.92915	17.6724	4.14342	25.566	4.67615	23.358	4.54584	0.214277	-0.130312
Brd4	-0.319714	1	0.0744942	114.787	122.018	112.708	97.8899	106.873	88.238	65.3841	59.8164	63.2086	69.0773	62.8874	64.8092	116.504	6.86424	97.6671	6.6098	62.8031	5.97276	65.5913	6.03543	-0.254437	0.0626699
Tfr2	-0.280864	1	0.0746792	112.55	100.715	121.655	102.812	91.7478	87.7199	25.076	25.3112	26.0668	26.4241	25.2923	26.6315	111.64	6.80271	94.0932	6.55602	25.4846	4.67156	26.116	4.70686	-0.246693	0.0353051
Slc30a10	0.2916	1	0.0747552	55.9254	44.6335	49.9321	57.7861	53.5362	54.9113	46.1082	44.2451	40.6953	39.7865	37.7439	40.8647	50.1637	5.64857	55.4112	5.79211	43.6828	5.44899	39.465	5.3025	0.143534	-0.146493
Eif2b5	-0.188958	1	0.0747917	200.493	192.011	185.153	172.629	178.52	156.963	48.6125	48.01	47.1277	47.4155	46.8079	49.4092	192.552	7.58911	169.371	7.40404	47.9167	5.58246	47.8775	5.58128	-0.185063	-0.00118116
Fam104a	0.434505	1	0.0748399	9.2277	7.82535	11.2564	10.9374	13.1353	10.5333	55.8979	55.5468	55.2719	53.1488	51.2598	45.9699	9.43647	3.23825	11.5353	3.52799	55.5722	5.79629	50.1262	5.64749	0.28974	-0.148799
Abcf3	-0.245252	1	0.0752473	93.2557	102.744	107.946	85.6765	96.1263	99.2893	13.7468	15.8169	16.8332	16.0209	16.3771	18.4401	101.315	6.66271	93.6974	6.54994	15.4656	3.95099	16.946	4.08288	-0.112769	0.131883
Ppie	-0.196193	1	0.0754414	136.178	136.509	140.993	119.4	138.318	120.356	35.0717	35.9785	33.0698	36.6655	37.4006	34.9687	137.893	7.10741	126.025	6.97756	34.7067	5.11714	36.3449	5.18368	-0.129846	0.0665414
Homer2	-0.371873	1	0.0755179	15.2397	13.9117	19.3378	10.3906	12.5382	11.224	33.7599	35.2419	36.5453	31.9494	31.9644	32.1129	16.1631	4.01463	11.3843	3.50897	35.1824	5.13678	32.0089	5.0004	-0.505663	-0.13638
Hmg20b	-0.314695	1	0.075566	23.0692	21.7371	21.5025	17.4999	18.7078	15.7136	21.7477	21.4507	20.4125	19.951	20.9091	20.7432	22.103	4.46617	17.3071	4.11329	21.2036	4.40624	20.5344	4.35997	-0.352875	-0.0462651
Cds2	-0.292773	1	0.0756542	38.0293	39.1268	41.9949	27.1613	34.6293	33.4994	20.566	22.2214	23.6546	21.4075	19.9821	23.6912	39.717	5.31168	31.7633	4.98929	22.1473	4.46906	21.6936	4.4392	-0.322394	-0.0298655
Rab8b	0.300503	1	0.0757584	83.3289	86.0789	80.0933	105.364	86.3743	111.204	52.3528	45.8957	48.632	50.2359	45.755	48.5263	83.167	6.37794	100.981	6.65794	48.9602	5.61354	48.1724	5.59014	0.279996	-0.0234006
Dock2	-0.17907	1	0.0760039	341.145	329.244	313.013	335.05	296.141	337.238	43.3111	40.3028	43.6521	47.8085	44.5648	49.1558	327.801	8.35668	322.81	8.33454	42.422	5.40674	47.1764	5.55999	-0.022137	0.153252
Spred1	-0.310478	1	0.0764666	29.221	29.1277	27.9966	24.2446	26.2705	20.2032	33.9117	30.7881	30.1648	35.8333	29.6298	30.6773	28.7818	4.84708	23.5728	4.55905	31.6215	4.98284	32.0468	5.00211	-0.288033	0.0192719
Agtpbp1	-0.352594	1	0.0765692	40.8256	30.1421	30.1613	33.3591	25.4745	26.7649	12.7602	11.5404	13.4873	13.4779	13.0696	13.88	33.7096	5.07509	28.5328	4.83455	12.596	3.65489	13.4758	3.7523	-0.240538	0.0974126
Rnf220	-0.26079	1	0.076857	54.8069	50.8648	49.0662	48.6715	39.0078	37.989	60.7115	56.0515	50.8626	58.651	53.6403	50.6682	51.5793	5.68872	41.8894	5.38851	55.8752	5.80414	54.3198	5.76341	-0.300206	-0.0407293
Trim33	-0.261606	1	0.0769989	113.389	98.6864	101.884	108.098	107.669	96.3538	28.9355	26.5184	27.8045	34.4693	30.614	34.0168	104.653	6.70947	104.04	6.701	27.7528	4.79456	33.0333	5.04585	-0.00847213	0.251289
Rbm34	-0.248864	1	0.0771869	87.9427	90.1365	80.8149	83.489	84.3841	81.1582	26.5721	24.1994	21.9946	29.3139	27.7414	26.263	86.298	6.43126	83.0105	6.37522	24.2554	4.60023	27.7728	4.7956	-0.0560347	0.195367
Stard7	-0.31527	1	0.0773273	96.4714	89.8466	85.4329	75.8328	81.0008	60.437	81.4293	72.9461	69.1742	78.4633	70.8757	71.7953	90.5836	6.50118	72.4235	6.17839	74.5165	6.21949	73.7114	6.20382	-0.322792	-0.0156717
Acp5	-0.175591	1	0.0774863	344.501	378.225	427.886	304.243	320.819	324.46	53.9898	60.4849	65.1799	50.7214	58.1609	58.7367	383.537	8.58322	316.507	8.30609	59.8849	5.90412	55.873	5.80408	-0.277128	-0.10004
Usp22	-0.262111	1	0.0775809	76.6178	76.3696	67.2495	65.4422	69.2587	60.2643	17.5955	16.1375	16.1847	18.5408	16.8806	17.3884	73.4123	6.19795	64.9884	6.02211	16.6392	4.05652	17.6033	4.13777	-0.17584	0.0812552
Enoph1	-0.293554	1	0.0776087	53.1292	61.2986	60.0339	43.3851	50.7499	40.2338	21.8995	21.7031	22.6431	21.4075	21.035	19.9218	58.1539	5.8618	44.7896	5.48509	22.0819	4.46479	20.7881	4.37768	-0.376712	-0.087106
Srf	-0.54304	1	0.0776803	13.7017	14.7812	15.2971	9.66139	13.1353	5.69834	53.9139	41.0394	38.5425	51.2531	38.7625	34.2241	14.5934	3.86724	9.49833	3.24767	44.4986	5.47569	41.4132	5.37202	-0.619565	-0.103669
Pno1	-0.184995	1	0.0778751	212.237	218.965	213.294	180.103	176.331	188.909	58.8468	54.6396	52.4448	55.2988	52.0953	52.6565	214.832	7.74706	181.781	7.50606	55.3104	5.78948	53.3502	5.73742	-0.241008	-0.0520564
Tomm22	0.367493	1	0.077914	66.6911	70.2833	94.5246	89.8692	85.9763	89.274	106.462	106.149	99.7799	94.5536	94.7145	89.0608	77.1663	6.2699	88.3732	6.46554	104.13	6.70224	92.7763	6.53568	0.195637	-0.166559
Ufsp2	0.313795	1	0.0779153	59.281	60.1393	54.6944	60.3381	76.2244	82.367	15.9476	16.5058	17.8966	16.5758	17.2125	16.9047	58.0382	5.85893	72.9765	6.18936	16.7833	4.06896	16.8977	4.07875	0.330429	0.0097962
Fis1	0.317076	1	0.0781757	173.928	206.502	216.036	200.702	223.897	259.188	63.4977	71.4182	71.0416	59.8069	67.4652	62.2374	198.822	7.63533	227.929	7.83244	68.6525	6.10124	63.1698	5.98116	0.197106	-0.120077
Tada1	-0.248291	1	0.0782614	59.7004	62.6028	62.4872	55.4163	54.9293	49.731	15.6549	15.9465	14.2395	15.9747	15.9193	15.3847	61.5968	5.94478	53.3589	5.73766	15.2803	3.9336	15.7596	3.97816	-0.207128	0.0445561
Tfcp2	0.404005	1	0.0782903	59.98	69.7036	92.2156	59.4267	86.5733	128.99	59.5189	79.0027	85.8776	60.1074	70.601	73.4689	73.9664	6.2088	91.6633	6.51827	74.7998	6.22496	68.0591	6.08872	0.309474	-0.136246
Sel1l	-0.247639	1	0.0783935	103.881	100.425	105.492	98.6191	99.9076	89.6194	28.491	27.1868	27.1561	31.3252	29.0118	31.0688	103.266	6.69023	96.0487	6.58569	27.6113	4.78719	30.4686	4.92925	-0.104532	0.142063
Znhit2	0.444564	1	0.0783935	13.8415	11.8829	18.7606	16.7707	16.9166	18.8218	19.1675	17.3447	15.7179	15.7898	15.5073	14.2715	14.8284	3.89029	17.503	4.12953	17.41	4.12185	15.1895	3.925	0.239247	-0.196842
Cdk17	-0.25077	1	0.0784911	46.8375	44.1987	49.7877	39.1924	39.0078	36.7802	16.197	14.7665	16.3144	15.5123	14.3857	15.876	46.9413	5.55279	38.3268	5.26028	15.7593	3.97813	15.258	3.9315	-0.292506	-0.0466356
Pabpn1	-0.330423	1	0.0786271	180.779	200.996	194.822	147.291	158.618	142.113	136.156	128.315	149.32	143.634	132.493	127.914	192.199	7.58645	149.341	7.22246	137.93	7.1078	134.68	7.07339	-0.363991	-0.0344042
Adsl	-0.174372	1	0.0786954	353.449	339.533	341.587	313.357	310.271	298.904	56.1473	56.413	55.9463	55.2295	57.1423	56.9173	344.856	8.42985	307.511	8.26449	56.1688	5.8117	56.4297	5.81838	-0.165359	0.00668408
Sptssa	0.337525	1	0.078703	12.5832	15.7956	17.3175	18.9582	15.3245	14.6776	21.9212	20.9937	21.1646	18.4484	17.8076	18.1868	15.2321	3.92904	16.3201	4.02858	21.3599	4.41683	18.1476	4.18171	0.0995324	-0.235124
Mb21d1	0.26547	1	0.0787117	52.0107	48.2563	47.0458	61.2496	63.4871	61.1277	20.0456	17.4675	19.5565	20.6446	19.8676	19.1004	49.1043	5.61778	61.9548	5.95314	19.0232	4.24969	19.8709	4.31258	0.335367	0.0628924
Rnf6	-0.253198	1	0.0788549	76.7577	74.9205	71.146	67.812	67.2685	60.2643	28.6753	27.4801	29.2051	29.1983	29.3665	30.1552	74.2747	6.2148	65.1149	6.02492	28.4535	4.83054	29.5734	4.88623	-0.189883	0.0556915
Nop9	-0.309567	1	0.0788636	185.113	179.259	176.35	155.129	155.235	133.997	59.3563	60.2325	61.2634	64.4999	59.0077	60.5408	180.24	7.49378	148.12	7.21063	60.2841	5.9137	61.3495	5.93898	-0.283152	0.0252745
Laptm4a	0.191327	1	0.0788895	123.176	127.669	131.613	128.15	144.488	147.466	52.8515	56.4062	57.9175	54.6284	52.8506	53.4012	127.486	6.99419	140.035	7.12964	55.725	5.80025	53.6267	5.74488	0.135447	-0.0553735
Dsn1	0.274683	1	0.079231	43.482	38.9818	47.4787	49.4007	48.3617	59.0556	13.9636	13.3615	13.6948	12.8537	13.4358	14.8627	43.3142	5.43677	52.2726	5.70798	13.6733	3.77329	13.7174	3.77794	0.271216	0.00464589
Gns	-0.269847	1	0.07951	70.6059	63.1825	60.6112	63.4371	50.5509	44.0327	21.3791	18.8589	18.6747	21.3844	17.4986	18.5707	64.7998	6.01792	52.6735	5.71901	19.6376	4.29554	19.1512	4.25936	-0.298912	-0.0361803
Nfix	-0.331676	1	0.0796646	38.8682	37.5327	34.635	33.5414	29.2558	24.6928	32.1879	30.3379	33.7701	35.4171	29.3208	30.5698	37.0119	5.20992	29.1634	4.86608	32.0986	5.00444	31.7692	4.98956	-0.343834	-0.0148816
Msl1	-0.433074	1	0.0797307	8.249	11.4482	10.5348	6.01558	6.96567	7.59779	32.7517	33.7141	37.0122	31.0247	30.9917	33.2414	10.0773	3.33304	6.85968	2.77814	34.4927	5.10822	31.7526	4.9888	-0.5549	-0.119416
Cops5	-0.17667	1	0.0800127	286.059	284.611	286.749	264.321	266.686	242.957	59.3563	59.073	56.88	58.8128	61.64	58.1225	285.806	8.15889	257.988	8.01116	58.4364	5.8688	59.5251	5.89543	-0.147734	0.0266301
Slc7a1	-0.31495	1	0.0801262	338.628	335.186	268.998	325.206	291.563	235.704	91.6201	77.6454	74.8544	101.535	86.4058	85.253	314.271	8.29586	284.158	8.15055	81.3733	6.34648	91.0647	6.50882	-0.145316	0.162337
2810474O19Rik	-0.334747	1	0.0801329	95.3529	106.367	84.1341	97.1608	100.107	104.815	19.7746	20.9869	21.2425	25.0833	26.391	31.0381	95.2846	6.57417	100.694	6.65384	20.668	4.36933	27.5041	4.78158	0.0796649	0.41225
Spta1	-0.736383	1	0.0801798	477.603	802.099	654.456	611.22	364.006	425.476	38.1507	38.0179	39.2947	43.2542	45.4003	50.8755	644.719	9.33253	466.901	8.86697	38.4877	5.26633	46.51	5.53947	-0.465556	0.273142
Actr2	-0.298357	1	0.0802589	514.933	561.252	529.338	442.419	482.423	441.708	153.145	146.697	151.784	156.672	151.88	164.111	535.174	9.06386	455.516	8.83136	150.542	7.23402	157.554	7.29971	-0.232506	0.065686
Rif1	-0.32418	1	0.080348	212.656	210.56	188.183	220.389	188.073	189.081	39.9069	30.1333	34.1072	45.1499	38.3276	42.9528	203.8	7.67101	199.181	7.63794	34.7158	5.11752	42.1434	5.39724	-0.0330717	0.279714
Cltc	-0.303806	1	0.0805264	2029.11	2048.94	1618.75	2091.05	1738.43	1625.58	118.799	100.051	107.587	136.952	118.576	128.59	1898.93	10.891	1818.36	10.8284	108.812	6.7657	128.039	7.00044	-0.0625556	0.234745
Ppp1r7	-0.182515	1	0.0806804	236.844	261.425	261.205	230.05	230.066	218.609	44.9915	43.488	41.3177	44.5026	43.3746	43.9892	253.158	7.98389	226.242	7.82172	43.2658	5.43515	43.9555	5.45797	-0.162172	0.0228167
Ireb2	-0.261812	1	0.0812769	114.507	108.685	104.482	96.2493	100.704	91.1735	40.3298	36.9607	38.8537	40.7574	39.1287	42.2312	109.225	6.77116	96.0422	6.5856	38.7147	5.27481	40.7058	5.34716	-0.185563	0.0723505
Wdr11	-0.284383	1	0.081349	70.8855	68.5443	65.8064	67.6297	62.492	57.6741	12.5651	11.7791	12.9426	13.501	12.8522	14.855	68.4121	6.09618	62.5986	5.96806	12.4289	3.63563	13.7361	3.7799	-0.12812	0.144265
Elmsan1	-0.295242	1	0.0813607	36.2117	35.0692	35.3565	31.5362	28.2607	24.3475	25.4555	24.0425	25.8074	24.9677	22.0535	25.6181	35.5458	5.15161	28.0481	4.80983	25.1018	4.64972	24.2131	4.59772	-0.341774	-0.0520014
Gcc2	-0.394798	1	0.0814482	45.719	46.0826	35.9338	37.9164	32.4401	38.507	11.4593	10.0399	10.297	12.4145	10.0139	13.1968	42.5785	5.41205	36.2878	5.18141	10.5987	3.40582	11.8751	3.56986	-0.230638	0.164043
Lrpprc	-0.306629	1	0.08148	480.399	480.679	425.288	473.408	426.498	424.095	48.9486	44.095	44.0411	54.1198	51.3514	55.996	462.122	8.85213	441.334	8.78573	45.6949	5.51396	53.8224	5.75013	-0.0664052	0.236173
4833420G17Rik	-0.289207	1	0.081505	33.5553	36.9531	45.6027	30.8071	30.2509	35.0534	12.9879	12.6044	13.2279	12.6919	12.3257	14.7322	38.7037	5.2744	32.0371	5.00167	12.9401	3.69377	13.2499	3.72791	-0.272725	0.0341374
Srebf2	-0.306186	1	0.0817275	312.903	310.406	319.796	271.066	270.865	231.215	205.769	193.261	187.032	206.908	189.006	196.692	314.368	8.29631	257.715	8.00963	195.354	7.60995	197.535	7.62597	-0.286678	0.016021
Tm2d3	-0.29328	1	0.0823611	38.8682	48.2563	51.0866	31.3539	35.0274	39.3704	9.84393	10.9402	11.3086	10.1027	10.2886	9.9801	46.0704	5.52577	35.2506	5.13957	10.6976	3.41921	10.1238	3.33968	-0.386192	-0.0795338
Leprotl1	0.275987	1	0.0825028	24.6072	28.2582	28.5738	27.8904	35.0274	33.4994	15.3839	17.8767	16.1069	15.9053	16.8806	15.7686	27.1464	4.76269	32.1391	5.00626	16.4558	4.04053	16.1848	4.01657	0.243566	-0.0239564
Ide	-0.317531	1	0.0826621	246.352	232.732	219.066	224.035	214.145	197.197	42.0969	38.2089	40.5915	45.5198	41.9898	49.3247	232.716	7.86243	211.792	7.72651	40.2991	5.33268	45.6114	5.51132	-0.135923	0.178648
Spast	-0.308534	1	0.0827198	59.5606	64.7765	63.3531	47.3955	55.5264	46.6228	26.5179	25.6044	23.7843	25.2682	23.2895	26.286	62.5634	5.96725	49.8482	5.63947	25.3022	4.66119	24.9479	4.64085	-0.327777	-0.0203434
Pdha1	-0.311439	1	0.0828093	292.909	321.419	295.552	254.477	265.293	237.258	92.0104	93.5783	84.7105	85.5143	94.2682	99.1561	303.293	8.24457	252.343	7.97924	90.0997	6.49345	92.9795	6.53884	-0.265329	0.0453908
Txndc5	-0.317748	1	0.08284	96.1917	94.339	114.151	81.4838	76.0253	65.6173	42.8775	42.3899	39.8393	39.5322	37.4807	37.0569	101.561	6.6662	74.3755	6.21676	41.7022	5.38205	38.0232	5.24881	-0.449442	-0.133243
Cd3eap	-0.256444	1	0.0829173	46.5579	46.5174	49.9321	40.6508	41.197	42.8239	24.187	27.064	25.6777	24.3204	28.2679	27.6295	47.6691	5.57498	41.5572	5.37703	25.6429	4.68049	26.7393	4.74089	-0.197956	0.0603988
Egln1	-0.325797	1	0.0830626	25.5859	25.0701	22.8013	20.5988	19.3049	16.9224	72.7887	73.785	75.1916	72.7068	73.1989	68.7322	24.4858	4.61387	18.942	4.24352	73.9218	6.20793	71.546	6.1608	-0.370355	-0.0471285
Fam103a1	0.703458	1	0.083121	1.39814	2.46354	2.74193	3.28123	2.58725	4.14425	22.3115	22.5625	20.3865	20.3209	21.7102	19.7683	2.2012	1.13829	3.33758	1.7388	21.7535	4.44317	20.5998	4.36456	0.600509	-0.078617
Rhot1	-0.265438	1	0.0833449	93.9547	113.033	101.884	91.3275	86.5733	83.403	24.9025	25.7681	25.2368	25.2682	25.5326	26.4473	102.957	6.6859	87.1013	6.44462	25.3025	4.66121	25.7494	4.68647	-0.241281	0.0252585
Yipf6	0.283693	1	0.0833832	29.5007	31.3014	38.3871	37.0049	35.6244	40.7518	17.2052	16.7991	18.9341	16.3677	16.7547	16.6898	33.063	5.04715	37.7937	5.24007	17.6461	4.14128	16.6041	4.05347	0.192927	-0.087813
Cnot11	-0.279494	1	0.0834576	83.4687	89.4119	90.1952	74.1922	82.3939	65.2719	30.2473	30.1742	29.8276	32.2731	29.8129	30.0708	87.6919	6.45437	73.9527	6.20853	30.0831	4.91088	30.7189	4.94106	-0.245842	0.0301757
Sos1	-0.31339	1	0.0836598	25.7257	23.0413	19.7708	20.5988	17.3147	18.3038	13.1722	11.9906	13.176	13.8941	11.7535	13.2966	22.8459	4.51387	18.7391	4.22798	12.7796	3.67577	12.9814	3.69837	-0.285887	0.0225987
Sfr1	-0.321776	1	0.0839771	283.682	328.52	263.514	272.16	247.182	249.864	45.1867	46.0866	47.7761	49.4037	51.3743	51.9809	291.905	8.18936	256.402	8.00226	46.3498	5.53449	50.9196	5.67015	-0.187095	0.135659
Morc2a	-0.297819	1	0.0843168	86.4048	94.1941	81.1035	72.5516	85.9763	77.8774	21.5851	24.6291	25.159	26.2392	24.9719	27.6679	87.2341	6.44682	78.8017	6.30016	23.791	4.57235	26.293	4.71661	-0.146665	0.144259
Zfp672	0.551065	1	0.0843168	3.0759	4.34742	4.32937	5.10413	5.97058	5.52567	11.7412	13.0682	11.1011	11.0968	12.2227	11.5232	3.91756	1.96996	5.53346	2.46818	11.9702	3.58137	11.6142	3.53782	0.498225	-0.0435502
Eif4ebp2	-0.384451	1	0.0843571	67.8096	69.8485	79.3718	53.7757	54.9293	42.4786	97.0408	77.1544	76.4106	88.6584	69.3192	68.4558	72.3433	6.17679	50.3945	5.65519	83.5352	6.38431	75.4778	6.23798	-0.521593	-0.146332
Pfdn4	0.342816	1	0.084363	83.0493	105.497	98.7096	107.916	108.465	128.299	20.7395	19.9843	17.8188	17.5467	19.9363	18.3864	95.7521	6.58123	114.893	6.84415	19.5142	4.28645	18.6231	4.21902	0.262921	-0.0674257
Znhit3	0.287178	1	0.084599	80.253	71.7324	66.6723	91.1452	82.1949	74.4238	11.5243	12.468	10.6342	10.75	10.5861	10.7094	72.8859	6.18757	82.588	6.36786	11.5422	3.52884	10.6818	3.41709	0.180292	-0.111755
Rsrp1	-0.207064	1	0.084946	70.8855	94.339	99.5755	61.6141	75.2293	86.6839	55.4968	69.4062	76.1512	55.9461	69.2162	70.636	88.2666	6.4638	74.5091	6.21934	67.0181	6.06648	65.2661	6.02826	-0.244452	-0.0382155
Zbtb45	0.356209	1	0.0851884	20.5526	21.4473	21.0696	24.2446	20.1009	32.636	11.5135	12.468	12.4239	11.6516	11.6848	11.6921	21.0232	4.39391	25.6605	4.68148	12.1351	3.60112	11.6762	3.54549	0.287571	-0.055623
Reep3	0.379427	1	0.0852959	12.3036	9.85415	11.6893	15.1301	13.1353	14.1595	12.8145	11.0493	12.4757	12.0215	11.7077	11.0549	11.2823	3.496	14.1416	3.82188	12.1132	3.5985	11.5947	3.53539	0.325881	-0.0631129
Tmem209	-0.180408	1	0.0854637	221.185	215.922	216.901	236.431	204.194	238.294	45.5661	39.2933	40.8509	52.0391	46.8766	49.0176	218.003	7.7682	226.306	7.82213	41.9034	5.389	49.3111	5.62384	0.05393	0.234844
Ubr2	-0.194007	1	0.0857918	138.276	139.117	142.292	130.884	126.775	141.077	20.6853	19.9161	21.9946	21.4768	21.8818	24.4512	139.895	7.1282	132.912	7.05433	20.8653	4.38304	22.6033	4.49846	-0.0738696	0.115426
Smchd1	-0.325389	1	0.085825	418.742	461.986	361.502	426.924	397.242	391.632	49.7292	46.6596	50.681	59.645	57.7832	62.7211	414.077	8.69375	405.266	8.66273	49.0233	5.61539	60.0498	5.90809	-0.0310283	0.292692
Plrg1	-0.178184	1	0.0858671	311.085	319.535	293.387	286.743	300.519	276.801	29.0439	29.0488	30.0092	31.0709	32.056	29.7484	308.002	8.2668	288.021	8.17003	29.3673	4.87614	30.9584	4.95226	-0.0967677	0.0761204
Mrpl50	0.284241	1	0.0860325	76.6178	79.8476	67.6825	97.1608	76.2244	85.9932	30.7677	31.2246	27.623	29.0596	29.4581	26.8388	74.716	6.22334	86.4594	6.43395	29.8718	4.90071	28.4522	4.83047	0.210607	-0.0702437
Zfp652	-0.325175	1	0.0862228	23.3489	24.3455	21.3582	20.0519	19.7029	14.3322	30.6593	24.3426	23.0321	29.8456	23.4955	22.7776	23.0175	4.52466	18.029	4.17225	26.0113	4.70107	25.3729	4.66522	-0.352413	-0.0358506
Tnrc6a	-0.328337	1	0.0863212	62.6365	65.2113	60.6112	58.8798	49.1577	39.8884	44.9698	39.3002	44.119	45.7279	39.5407	40.4578	62.8196	5.97314	49.3086	5.62377	42.7963	5.41941	41.9088	5.38918	-0.349375	-0.0302344
Prmt7	-0.290615	1	0.0864205	129.048	128.828	143.446	107.916	109.461	105.16	32.589	35.617	33.6663	30.2849	33.7383	36.3429	133.774	7.06366	107.512	6.74836	33.9575	5.08566	33.4554	5.06417	-0.3153	-0.021491
Tipin	0.356193	1	0.0869432	112.69	117.67	109.244	120.129	144.289	151.61	64.1156	63.9224	52.3929	51.0219	59.7402	62.1683	113.201	6.82275	138.676	7.11558	60.1437	5.91034	57.6435	5.84909	0.292829	-0.0612549
Atad3a	-0.30996	1	0.0870068	119.401	120.568	143.013	104.635	108.863	98.944	58.4131	57.7225	57.8137	56.3391	58.8704	61.0782	127.661	6.99617	104.147	6.70248	57.9831	5.85756	58.7626	5.87683	-0.29369	0.0192648
Tmem50a	0.307388	1	0.0871282	246.911	267.076	271.163	267.602	284	344.836	48.4499	52.2865	53.8194	45.1037	49.4516	47.6588	261.717	8.03186	298.813	8.2231	51.5186	5.68702	47.4047	5.56696	0.191237	-0.120064
Ell	0.372496	1	0.0871753	23.6285	25.3599	20.4923	31.3539	27.8627	34.1901	13.324	13.2387	11.6198	12.0446	13.2985	14.4481	23.1603	4.53358	31.1356	4.96049	12.7275	3.66988	13.2637	3.72941	0.426912	0.0595361
Maz	-0.207535	1	0.0872882	85.1465	73.3264	77.2071	66.3537	66.4724	55.084	187.924	165.795	166.127	166.128	155.462	154.937	78.56	6.29572	62.6367	5.96894	173.282	7.43698	158.842	7.31145	-0.326787	-0.125525
Gtpbp3	0.330436	1	0.087325	30.4794	32.4607	38.0984	33.5414	32.8382	46.6228	12.7169	15.2372	15.4844	12.6226	13.0467	13.166	33.6795	5.0738	37.6675	5.23525	14.4795	3.85594	12.9451	3.69433	0.161448	-0.161604
Ppp3ca	-0.368367	1	0.087325	62.9161	72.457	59.7453	54.8694	58.3126	41.0971	37.0665	33.339	38.0756	37.4053	36.2561	36.5348	65.0395	6.02324	51.4264	5.68444	36.1604	5.17634	36.7321	5.19897	-0.338806	0.0226313
Ssb	-0.299203	1	0.0874174	838.182	854.123	758.938	786.036	756.671	738.367	130.497	136.582	131.682	136.513	156.515	163.689	817.081	9.67434	760.358	9.57054	132.921	7.05442	152.239	7.25019	-0.1038	0.195773
Abcf2	-0.312767	1	0.0878642	258.655	249.832	203.625	200.155	210.96	193.053	75.499	72.5641	71.5085	77.1687	76.4606	77.8985	237.37	7.891	201.389	7.65384	73.1905	6.19359	77.1759	6.27008	-0.237153	0.0764933
Prpf4	-0.24078	1	0.0878911	108.356	109.41	108.811	103.176	100.306	94.109	27.3527	26.6412	29.1533	30.3774	28.7943	30.0862	108.859	6.76632	99.197	6.63222	27.7157	4.79263	29.7526	4.89494	-0.134092	0.102312
Nlk	-0.55126	1	0.0881184	5.03329	6.37621	5.19524	3.28123	4.1794	3.7989	12.8145	12.4476	14.3691	12.5301	12.5775	13.9414	5.53491	2.46856	3.75318	1.90811	13.2104	3.7236	13.0163	3.70225	-0.56045	-0.0213491
Kars	-0.160798	1	0.0883421	513.395	526.762	466.273	458.643	441.624	447.752	139.235	136.773	135.184	137.762	136.968	136.643	502.144	8.97196	449.339	8.81166	137.064	7.09871	137.124	7.09934	-0.160295	0.000630475
Atox1	0.433276	1	0.0885672	80.9521	69.1239	108.667	92.7858	114.237	121.219	37.034	41.0121	38.6722	35.6714	39.9298	34.1089	86.2477	6.43041	109.414	6.77365	38.9061	5.28192	36.57	5.19259	0.34324	-0.0893339
Snrpf	0.37393	1	0.0888596	63.6152	61.7333	75.331	75.4682	73.4381	93.9363	71.3468	78.1911	76.6959	74.6025	74.2747	62.2067	66.8932	6.06379	80.9475	6.33892	75.4113	6.23671	70.3613	6.13671	0.275128	-0.0999977
Tubb5	-0.134892	1	0.089101	3137.7	2801.62	2850.17	2716.86	2590.83	2478.95	476.856	419.213	449.282	475.311	426.044	408.946	2929.83	11.5166	2595.55	11.3418	448.45	8.8088	436.767	8.77072	-0.174778	-0.0380848
Tmed3	-0.287718	1	0.0893149	36.6312	41.0106	52.0967	31.5362	37.2166	35.3988	9.06335	11.0152	10.5564	9.03923	10.3229	10.9397	43.2462	5.4345	34.7172	5.11758	10.2117	3.35215	10.1006	3.33637	-0.316922	-0.0157725
Tram1	-0.319955	1	0.0898976	179.521	208.241	219.355	158.593	186.879	160.072	43.8098	46.414	48.0873	48.5714	44.9654	50.2843	202.372	7.66087	168.514	7.39673	46.1037	5.52681	47.9404	5.58317	-0.264139	0.0563578
Mkrn1	0.194034	1	0.0902474	81.3715	87.0933	97.2665	79.6609	100.107	104.47	75.7376	86.6691	88.2898	70.4413	80.6836	83.1035	88.5771	6.46886	94.7457	6.56599	83.5655	6.38483	78.0761	6.28681	0.0971273	-0.0980255
Vamp5	0.314882	1	0.0907227	88.0826	87.9628	111.986	94.6087	100.505	125.018	46.8237	54.3804	52.4707	42.6069	48.2042	46.6301	96.0106	6.58512	106.711	6.73756	51.225	5.67877	45.8137	5.51771	0.152438	-0.161067
Ppp2r5d	-0.254777	1	0.0908475	89.6205	91.4407	96.112	77.4734	79.0106	72.0063	29.109	32.4182	29.9573	29.3139	29.3894	31.2991	92.3911	6.52968	76.1635	6.25103	30.4948	4.93049	30.0008	4.90693	-0.278654	-0.0235626
Strap	-0.319593	1	0.0908867	248.449	253.02	231.91	223.853	206.781	159.726	90.9479	87.5557	86.6298	90.0686	87.8021	86.8882	244.459	7.93345	196.787	7.62049	88.3778	6.46561	88.253	6.46357	-0.312963	-0.00203939
Spn	-0.295385	1	0.0910223	444.328	455.464	549.108	398.669	386.893	391.286	178.123	181.966	199.404	187.003	178.568	193.829	482.967	8.91578	392.283	8.61575	186.498	7.54301	186.467	7.54278	-0.30003	-0.000239732
Lats1	-0.291701	1	0.0912557	37.1904	32.4607	28.1409	32.0831	27.8627	21.0666	22.2356	17.7267	18.8044	22.5172	17.9106	18.5937	32.5973	5.02668	27.0041	4.75511	19.5889	4.29196	19.6738	4.29821	-0.271574	0.00624257
Ybx1	-0.304993	1	0.0913664	306.052	342.721	298.005	252.472	274.248	210.839	717.523	613.845	575.077	620.239	631.163	573.786	315.593	8.30192	245.853	7.94165	635.481	9.31171	608.396	9.24887	-0.360268	-0.0628389
Atp5l	0.832132	1	0.0914323	1.81758	1.59405	1.58744	1.64061	2.78627	3.62622	14.5274	12.9864	13.8245	14.9113	12.6805	10.3639	1.66636	0.736696	2.68437	1.42458	13.7794	3.78444	12.6519	3.66128	0.687886	-0.12316
Zrsr2	-0.28614	1	0.0914615	29.9201	28.2582	23.3786	28.0727	27.6637	20.3759	18.5929	17.7608	16.9888	20.3903	20.829	18.824	27.1856	4.76477	25.3708	4.66509	17.7808	4.15225	20.0144	4.32297	-0.099678	0.170718
Gm15800	-0.310526	1	0.0917725	59.281	72.1671	64.5076	54.3225	53.1381	51.8031	30.7243	37.0221	37.4272	32.7354	33.6468	39.6594	65.3186	6.02942	53.0879	5.73031	35.0579	5.13167	35.3472	5.14352	-0.299109	0.011857
Nob1	-0.175337	1	0.0922584	250.406	239.833	254.423	238.254	239.221	228.797	43.7231	44.3337	42.7443	48.4327	47.0597	44.803	248.22	7.95548	235.424	7.87912	43.6004	5.44627	46.7651	5.54736	-0.076361	0.101092
Susd6	0.30066	1	0.0922584	19.2943	21.1574	23.2343	23.3332	27.0666	27.4557	25.1953	26.3274	25.8852	23.1414	25.876	28.0748	21.2287	4.40794	25.9518	4.69776	25.8026	4.68945	25.6974	4.68355	0.289822	-0.00589725
Tor2a	0.435829	1	0.0923534	15.2397	12.8973	15.1528	19.1405	17.9117	13.2961	16.7065	18.1632	15.3288	12.9462	14.3056	15.5843	14.4299	3.85099	16.7828	4.06891	16.7328	4.06461	14.2787	3.83579	0.217917	-0.228816
Eml4	-0.294903	1	0.0925161	30.759	31.7361	25.399	31.7185	26.8676	20.8939	20.6744	16.5808	15.4844	21.3612	19.4556	17.0583	29.298	4.87273	26.4933	4.72756	17.5799	4.13585	19.2917	4.26991	-0.145174	0.134056
Fam20b	-0.403859	1	0.092673	13.4221	13.9117	11.2564	9.84368	10.9461	7.25244	24.6098	27.0163	27.8045	25.2682	24.5255	25.787	12.8634	3.6852	9.34739	3.22456	26.4769	4.72666	25.1936	4.65499	-0.460636	-0.0716765
Dnttip2	0.337901	1	0.0930861	118.981	95.4983	75.764	185.936	167.574	169.224	52.9599	37.5063	39.2947	66.5805	60.816	57.6926	96.7479	6.59616	174.245	7.44497	43.2536	5.43475	61.6964	5.94711	0.848812	0.512364
Ppa1	-0.303139	1	0.0932406	242.996	257.802	265.679	212.368	211.557	206.867	60.5922	60.9487	67.0214	67.3203	63.7114	60.3642	255.492	7.99714	210.264	7.71606	62.8541	5.97393	63.7987	5.99545	-0.281076	0.0215194
Slc41a3	0.312333	1	0.0933718	57.8828	50.8648	44.5925	52.3173	59.7058	58.3648	51.5722	44.5384	39.3725	42.6069	40.7881	38.1393	51.1134	5.67563	56.796	5.82772	45.161	5.49701	40.5115	5.34026	0.152088	-0.156748
Zfp609	-0.34299	1	0.0934016	16.498	16.5202	15.4414	17.6822	11.3441	11.224	19.8396	16.383	16.3663	20.0666	16.8005	18.3634	16.1532	4.01375	13.4168	3.74596	17.5297	4.13173	18.4102	4.20243	-0.267784	0.0707055
Klf9	-0.322562	1	0.0934675	30.0599	21.5922	31.7487	22.7863	24.4794	20.2032	27.8405	22.6238	28.1936	29.7532	22.4312	27.5067	27.8003	4.79703	22.4896	4.49119	26.2193	4.71256	26.5637	4.73138	-0.305839	0.0188241
Krr1	-0.300583	1	0.0935952	189.028	214.328	184.143	170.988	188.67	179.584	55.8545	55.8196	55.1941	63.5983	61.0792	63.9801	195.833	7.61348	179.748	7.48983	55.6227	5.7976	62.8858	5.97466	-0.12365	0.177061
Stau1	-0.269735	1	0.0935952	45.02	43.9089	42.2835	38.4633	37.2166	33.8447	18.7989	18.4497	18.6747	17.9397	18.0594	19.9986	43.7375	5.4508	36.5082	5.19015	18.6411	4.22041	18.6659	4.22233	-0.26065	0.00192067
Osbp	-0.260161	1	0.0936303	94.0945	95.933	93.5144	75.8328	86.5733	92.3822	43.1919	44.0064	44.4043	45.358	45.1485	51.1288	94.514	6.56246	84.9295	6.40819	43.8675	5.45508	47.2118	5.56107	-0.154263	0.105994
Fam117a	0.400394	1	0.0937306	9.92676	11.4482	17.8947	10.7551	16.1206	18.4764	22.5174	31.4633	29.4386	18.9338	25.8645	29.0114	13.0899	3.71038	15.1174	3.91814	27.8064	4.79735	24.6032	4.62078	0.207754	-0.176571
Eif3b	-0.14055	1	0.0937477	1697.34	1569.42	1634.77	1625.67	1502	1434.6	305.043	261.453	277.112	309.738	281.031	273.462	1633.84	10.6741	1520.75	10.5706	281.202	8.13547	288.077	8.17031	-0.10348	0.0348455
Srsf3	-0.364446	1	0.0939546	51.5912	42.7496	42.7164	40.2862	37.0176	28.1464	200.304	204.87	195.514	188.414	200.324	203.057	45.6858	5.51367	35.15	5.13545	200.229	7.64551	197.265	7.62399	-0.378218	-0.0215192
Galnt1	-0.304726	1	0.0939559	80.5326	87.0933	83.1239	60.5204	79.0106	66.1353	76.4206	77.7068	76.0215	78.2321	74.6295	79.6028	83.5833	6.38514	68.5554	6.0992	76.7163	6.26146	77.4881	6.2759	-0.285943	0.0144418
Phkg2	0.337421	1	0.094427	18.1758	15.9405	15.2971	23.88	21.8921	20.8939	11.1557	10.9607	10.2192	10.75	11.3987	12.2141	16.4711	4.04187	22.222	4.47392	10.7785	3.43009	11.4543	3.51781	0.43205	0.0877235
Fam208a	-0.279005	1	0.0944875	60.3995	75.3552	71.8675	55.9631	60.1038	70.1069	14.7334	14.1391	16.2625	15.8129	15.6904	17.6187	69.2074	6.11285	62.0579	5.95554	15.045	3.91121	16.374	4.03333	-0.157311	0.122123
Sgpp1	-0.259472	1	0.0951437	52.2903	52.3139	53.3956	40.1039	44.3813	39.3704	40.8718	39.0342	41.1103	36.9661	35.9814	40.3196	52.6666	5.71882	41.2852	5.36755	40.3387	5.33409	37.7557	5.23862	-0.351264	-0.0954718
Hiat1	-0.254928	1	0.0951665	57.6032	54.4876	59.0237	49.4007	48.9587	43.86	43.5496	41.2918	37.4531	43.4854	39.6322	38.1854	57.0382	5.83386	47.4065	5.56701	40.7648	5.34925	40.4343	5.33751	-0.266844	-0.0117444
Erlin2	-0.256937	1	0.0953748	32.2969	30.5768	33.9134	24.4269	27.4646	28.319	15.9151	15.4691	16.2885	15.9978	15.0953	16.2368	32.2624	5.01178	26.7369	4.74076	15.8909	3.99013	15.7766	3.97972	-0.271023	-0.0104079
Fam160b1	-0.272844	1	0.0954396	36.9108	33.4751	36.511	33.7237	26.6686	26.0742	18.4845	16.3285	18.4413	19.1419	16.1596	16.5977	35.6323	5.15511	28.8222	4.84911	17.7514	4.14986	17.2997	4.11268	-0.306007	-0.0371834
Adgra2	-0.266848	1	0.0954704	40.6858	36.3734	40.5518	32.0831	32.0421	28.1464	46.3033	41.5237	40.5915	42.422	38.2703	40.2735	39.2036	5.29292	30.7572	4.94285	42.8062	5.41975	40.3219	5.33349	-0.350064	-0.0862536
Actr3	-0.190567	1	0.0965019	105.559	109.555	96.6892	96.7962	96.7233	88.4107	112.934	106.967	113.06	117.487	114.067	111.462	103.934	6.69953	93.9767	6.55423	110.987	6.79425	114.339	6.83717	-0.145299	0.0429243
Rps21	0.537883	1	0.0965019	221.744	158.246	312.725	308.618	323.008	356.233	351.682	365.392	463.288	429.236	399.298	333.995	230.905	7.85116	329.286	8.3632	393.454	8.62005	387.51	8.59809	0.512042	-0.0219616
Ubxn4	-0.177974	1	0.0966129	174.767	211.285	196.842	161.145	196.83	186.146	60.332	63.4791	64.8945	61.4714	66.4352	71.4268	194.298	7.60213	181.374	7.50282	62.9019	5.97503	66.4445	6.05408	-0.0993059	0.0790456
Macf1	-0.651675	1	0.0966421	99.6871	141.436	124.542	116.301	54.5313	66.308	28.2959	26.7708	29.9833	28.3661	25.9332	30.2934	121.888	6.92941	79.0468	6.30464	28.35	4.82527	28.1976	4.8175	-0.624779	-0.00777623
Suclg1	-0.259124	1	0.0968754	97.4501	98.2516	97.4108	88.4108	86.7724	76.3233	24.6857	26	27.6489	27.0021	27.3981	25.7563	97.7042	6.61035	83.8355	6.38949	26.1116	4.70662	26.7188	4.73979	-0.220859	0.0331688
Tmem234	0.29929	1	0.0970534	73.2623	75.79	83.9898	88.4108	81.9959	85.6478	62.5762	57.0337	53.6897	56.4778	51.6261	46.799	77.6807	6.27948	85.3515	6.41534	57.7665	5.85216	51.6343	5.69026	0.135861	-0.161904
Ercc8	0.395811	1	0.097088	8.66844	11.5931	11.6893	11.6666	13.7323	15.8863	12.6518	11.7587	11.1011	11.5822	12.0968	11.5308	10.6503	3.41282	13.7617	3.78259	11.8372	3.56525	11.7366	3.55295	0.36977	-0.0123081
Larp4b	-0.303219	1	0.0971147	259.774	253.889	211.995	213.644	216.533	202.032	82.4483	73.6486	76.4106	88.7047	78.7266	82.8271	241.886	7.91818	210.736	7.7193	77.5025	6.27617	83.4195	6.38231	-0.198887	0.106141
Atp11c	-0.335043	1	0.0973645	83.3289	93.4695	65.2292	89.8692	77.4185	66.6533	16.4029	13.5388	12.2423	18.1709	16.2855	16.4748	80.6758	6.33406	77.9803	6.28504	14.0614	3.81366	16.9771	4.08552	-0.0490267	0.271853
Rpl10	1.19808	1	0.0975797	0.559254	0.72457	0.432937	0.729162	1.39313	1.89945	263.097	290.454	297.42	294.411	307.914	270.445	0.572254	-0.805273	1.34058	0.422859	283.657	8.14801	290.923	8.18449	1.22813	0.0364893
Ecd	-0.298736	1	0.0977461	193.782	220.704	200.161	175.728	188.272	173.54	45.0024	44.7703	46.6867	51.1375	47.2543	48.3804	204.882	7.67865	179.18	7.48527	45.4865	5.50736	48.9241	5.61247	-0.193384	0.105108
Arl1	-0.344136	1	0.0979844	59.0013	58.2554	76.0526	49.583	51.745	48.6949	31.2122	31.3337	34.1332	34.4693	31.4952	29.4183	64.4364	6.0098	50.0076	5.64408	32.2264	5.01017	31.7943	4.99069	-0.365728	-0.0194757
Csf2rb2	0.319423	1	0.0981839	62.9161	97.3822	103.039	68.5412	113.839	129.68	85.8742	130.034	117.469	81.1219	114.834	119.078	87.7791	6.45581	104.02	6.70072	111.126	6.79605	105.011	6.7144	0.244915	-0.0816503
Zfp771	0.424021	1	0.0982369	11.0453	8.83975	12.1222	11.6666	11.9412	13.1235	21.39	17.5221	18.8822	19.1188	16.2969	14.2869	10.6691	3.41536	12.2437	3.61397	19.2647	4.26789	16.5675	4.05029	0.198607	-0.217603
Abce1	-0.29021	1	0.0983435	879.847	889.482	721.994	782.937	733.983	731.46	179.034	171.21	174.531	194.956	185.378	199.018	830.441	9.69773	749.46	9.54971	174.925	7.45059	193.117	7.59333	-0.148026	0.142743
Leprot	0.232857	1	0.098362	56.9041	60.4291	60.8998	65.8068	63.0891	62.5091	53.1551	51.7	50.9404	47.9935	46.8995	47.559	59.411	5.89266	63.8017	5.99552	51.9318	5.69855	47.484	5.56937	0.102864	-0.129178
Pphln1	-0.283011	1	0.098362	79.2743	91.5856	84.1341	69.0881	84.9812	72.179	37.8363	35.276	36.5453	40.5263	38.7281	38.9838	84.998	6.40936	75.4161	6.2368	36.5525	5.1919	39.4127	5.30059	-0.172556	0.10869
Arl15	0.322041	1	0.0985934	24.4674	21.4473	28.1409	24.4269	28.2607	30.7365	13.801	11.9974	13.9023	12.6919	11.5933	11.5692	24.6852	4.62557	27.8081	4.79743	13.2336	3.72613	11.9515	3.57912	0.171858	-0.147013
Snap29	-0.264808	1	0.0986752	42.5033	50.43	47.7674	41.0153	38.2117	40.0611	13.2806	15.6669	14.4729	13.5935	14.9808	15.853	46.9002	5.55152	39.7627	5.31334	14.4735	3.85534	14.8091	3.88841	-0.23818	0.0330756
Fxr1	-0.300002	1	0.0987392	397.909	395.47	325.713	346.169	349.478	322.043	51.1928	49.9334	51.5629	56.6397	57.2796	57.0478	373.031	8.54315	339.23	8.40612	50.8964	5.66949	56.989	5.83261	-0.137031	0.163121
Ints3	-0.304951	1	0.0990056	97.8695	96.6576	104.771	80.7546	87.7675	80.2948	26.9407	28.4282	30.3464	25.5688	27.627	35.0762	99.7659	6.64048	82.939	6.37398	28.5717	4.83652	29.424	4.87892	-0.266497	0.0424032
Sumf2	-0.266302	1	0.0990273	37.1904	39.2717	47.7674	29.531	32.2411	37.8163	13.8119	15.9738	17.2222	14.4951	15.2097	15.7993	41.4098	5.3719	33.1961	5.05294	15.6693	3.96987	15.168	3.92296	-0.318957	-0.0469052
Brd1	-0.293031	1	0.0990401	51.032	47.3869	39.5416	47.7601	41.197	41.2698	31.1363	28.0803	29.5423	33.9838	32.5252	35.6904	45.9868	5.52315	43.409	5.43992	29.5863	4.88686	34.0665	5.09028	-0.0832269	0.203422
Vamp2	0.640669	1	0.0991257	3.21571	5.36182	3.89643	6.38016	5.77156	5.35299	13.5625	13.8594	10.9454	9.80213	11.9137	13.0048	4.15799	2.05589	5.8349	2.54471	12.7891	3.67685	11.5736	3.53276	0.488824	-0.144085
Rit1	0.291189	1	0.0991491	16.7776	22.8964	24.5331	22.7863	24.4794	25.9016	10.3643	11.1107	11.4382	9.33977	10.8379	10.6403	21.4024	4.4197	24.3891	4.60816	10.9711	3.45564	10.2727	3.36074	0.188464	-0.0948962
Glud1	-0.308577	1	0.0993498	183.435	226.935	201.604	182.108	171.953	165.77	71.2059	66.7393	68.2923	70.7649	73.0501	73.3921	203.992	7.67237	173.277	7.43694	68.7458	6.1032	72.4024	6.17797	-0.235431	0.0747647
Nubp1	-0.32212	1	0.0995856	52.9893	52.7487	63.3531	42.4737	51.944	41.4425	20.1432	19.2886	19.0897	20.9451	19.1237	18.7319	56.3637	5.81669	45.2867	5.50102	19.5072	4.28593	19.6002	4.2928	-0.315678	0.00686791
Ssfa2	-0.278872	1	0.100203	44.7403	50.2851	46.1799	42.1091	41.794	33.8447	26.9624	24.7587	24.4068	25.8924	25.0176	25.7179	47.0685	5.55669	39.2493	5.29459	25.376	4.66539	25.5427	4.67484	-0.262095	0.00944698
Kpna1	-0.300125	1	0.100405	195.599	216.936	194.966	193.228	183.496	165.079	41.9776	40.3437	37.2197	45.8666	41.3947	43.6898	202.5	7.66178	180.601	7.49666	39.847	5.3164	43.6504	5.44792	-0.16512	0.131522
Brd3	-0.382998	1	0.100751	46.5579	47.097	39.2529	38.8279	27.4646	28.319	32.6541	32.4182	37.0381	29.9843	30.9688	33.3719	44.3026	5.46932	31.5372	4.97898	34.0368	5.08902	31.4417	4.97461	-0.490339	-0.114418
Tfrc	-0.25906	1	0.100808	3369.37	3587.63	3118.44	3479.56	3115.65	3073.82	374.872	368.809	379.252	431.849	410.365	446.325	3358.48	11.7136	3223.01	11.6542	374.311	8.54809	429.513	8.74656	-0.0594009	0.198465
Psat1	-0.147674	1	0.101049	752.057	742.829	741.91	692.339	714.081	667.57	201.464	197.033	198.574	206.723	206.63	199.64	745.599	9.54226	691.33	9.43323	199.024	7.6368	204.331	7.67477	-0.109025	0.0379685
1200014J11Rik	-0.238066	1	0.101185	82.9095	92.6	87.7419	78.0203	81.3989	80.4675	22.4849	22.7875	23.1877	23.0258	24.0792	26.4549	87.7504	6.45533	79.9622	6.32125	22.8201	4.51223	24.52	4.61588	-0.134088	0.103653
Gtf3a	0.285018	1	0.1012	42.5033	45.6479	50.5093	44.6611	52.9391	55.084	51.1494	48.9922	56.4391	48.1784	46.4074	46.6531	46.2202	5.53045	50.8947	5.66944	52.1936	5.7058	47.0796	5.55703	0.138994	-0.148769
Usp45	-0.253973	1	0.101251	67.8096	73.7612	73.7436	63.9839	56.9195	73.5604	22.821	22.1191	24.2252	22.9795	24.1822	27.3838	71.7715	6.16534	64.8213	6.0184	23.0551	4.52702	24.8485	4.63509	-0.146943	0.108073
Gpkow	-0.273843	1	0.101526	49.6338	52.0241	56.859	48.1247	48.1626	41.2698	17.7798	16.765	17.6631	17.3156	17.8763	19.4074	52.839	5.72353	45.8524	5.51892	17.4026	4.12123	18.1998	4.18585	-0.204606	0.0646138
Swi5	-0.16493	1	0.101663	335.832	367.212	383.005	299.321	331.168	307.883	67.2271	75.6675	79.0562	69.1235	73.6567	71.849	362.016	8.49991	312.791	8.28905	73.9836	6.20913	71.5431	6.16074	-0.210857	-0.0483931
Arl14ep	-0.239725	1	0.101786	93.8149	89.5568	80.5263	96.2493	83.9861	89.6194	19.4927	18.3201	18.2856	22.494	22.477	22.5857	87.966	6.45887	89.9516	6.49108	18.6995	4.22493	22.5189	4.49307	0.0322031	0.268139
Zmynd11	-0.24312	1	0.101994	65.7124	61.0088	54.6944	56.3277	57.5165	48.6949	47.42	42.2057	41.7587	51.0219	44.3474	43.7819	60.4718	5.91819	54.1797	5.75968	43.7948	5.45269	46.3837	5.53555	-0.15851	0.0828597
Clptm1	-0.301714	1	0.102011	235.446	259.106	275.348	221.665	219.12	202.032	57.4374	57.1496	61.2115	62.8354	59.4426	58.6676	256.633	8.00356	214.272	7.7433	58.5995	5.87282	60.3152	5.91445	-0.260262	0.0416336
Rnf5	0.465691	1	0.102075	6.43142	5.2169	5.33956	6.38016	7.96077	5.87102	19.0049	21.3348	22.2281	16.5758	18.5057	18.1254	5.66263	2.50147	6.73732	2.75217	20.8559	4.38238	17.7356	4.14858	0.250703	-0.233805
Cdc7	-0.328333	1	0.102232	51.5912	47.6767	47.0458	41.3799	48.3617	43.5146	10.1041	10.8652	11.3086	10.8425	11.5818	14.2639	48.7712	5.60796	44.4187	5.4731	10.7593	3.42751	12.2294	3.61228	-0.134862	0.184768
Ankrd10	-0.311311	1	0.102236	149.041	143.61	142.003	137.629	124.785	96.3538	43.4954	39.8526	39.0612	42.6531	40.3189	41.3176	144.885	7.17876	119.589	6.90195	40.8031	5.35061	41.4299	5.3726	-0.276817	0.0219932
Rnf128	-0.297292	1	0.102456	234.188	240.992	261.638	220.936	216.334	218.091	92.0863	84.8616	94.5147	106.251	97.1408	93.1987	245.606	7.9402	218.454	7.77118	90.4875	6.49965	98.8636	6.62737	-0.169018	0.127721
Rexo4	-0.235381	1	0.102571	44.0413	46.5174	51.8081	36.2758	46.1725	45.5867	18.8206	21.4985	22.3837	19.8354	22.9805	23.4225	47.4556	5.56851	42.6783	5.41543	20.9009	4.38549	22.0795	4.46464	-0.153074	0.0791421
Wars	-0.169164	1	0.102642	245.373	251.715	260.339	224.399	223.499	236.913	55.616	55.3967	55.7906	55.1139	55.8376	58.8519	252.476	7.98	228.27	7.8346	55.6011	5.79704	56.6011	5.82276	-0.145402	0.0257164
Spns1	-0.263569	1	0.102681	41.245	38.2573	45.8913	29.7133	36.0225	30.5638	18.0833	18.3542	18.96	17.2924	16.6403	17.0813	41.7979	5.38536	32.0999	5.0045	18.4658	4.20679	17.0047	4.08786	-0.380861	-0.118927
Net1	-0.260883	1	0.102755	66.8309	68.979	71.4346	59.7912	61.0989	56.12	38.1832	36.5856	42.5109	41.5203	38.2131	39.9434	69.0815	6.11023	59.0034	5.88273	39.0932	5.28885	39.8923	5.31804	-0.227502	0.0291925
Slc16a1	-0.163295	1	0.102861	428.808	415.758	375.645	393.383	397.043	325.669	71.5636	65.4571	64.1942	72.0827	67.1219	66.0452	406.737	8.66795	372.032	8.53928	67.0716	6.06763	68.4166	6.09627	-0.128671	0.0286429
Sgk3	-0.24365	1	0.103142	59.4208	59.1249	55.5602	43.932	49.3568	47.6589	23.3089	21.7099	23.3693	21.8467	21.035	22.4399	58.0353	5.85886	46.9825	5.55405	22.796	4.51071	21.7738	4.44452	-0.304806	-0.0661854
Sfmbt1	-0.25237	1	0.103276	58.1624	49.1258	47.3344	44.1143	47.3666	40.5791	21.8453	19.691	20.5681	22.1473	20.3368	20.3978	51.5409	5.68765	44.02	5.46009	20.7015	4.37166	20.9606	4.38961	-0.227559	0.0179495
Mfn1	-0.239546	1	0.103813	91.4381	89.7017	83.2682	83.8536	80.6028	75.9779	27.4069	25.4339	27.7786	30.8166	28.1305	27.4222	88.136	6.46166	80.1448	6.32454	26.8731	4.74809	28.7898	4.84749	-0.137123	0.0993925
Nxpe4	0.309492	1	0.103936	25.4461	31.1565	39.1086	27.8904	37.8136	41.0971	25.0543	25.1543	30.4242	23.3725	22.1451	27.3148	31.9037	4.99565	35.6004	5.15382	26.8776	4.74833	24.2775	4.60155	0.158168	-0.146787
Nrf1	-0.266914	1	0.104054	61.6578	68.5443	58.5908	61.9787	62.492	45.9321	31.8085	29.5399	26.7152	34.8392	31.5753	28.7196	62.931	5.9757	56.801	5.82784	29.3545	4.87551	31.7114	4.98693	-0.147855	0.111418
Rps17	1.63972	1	0.104167	0.279627	0.289828	0.144312	0.911452	0.597058	0.863385	207.275	233.291	258.619	246.672	260.763	235.054	0.237922	-2.07144	0.790632	-0.338922	233.062	7.86457	247.496	7.95126	1.73251	0.0866943
Esco1	-0.326203	1	0.1043	19.9933	25.215	20.9253	19.5051	20.698	18.1311	21.249	18.8794	21.1646	23.6731	21.6644	22.1481	22.0445	4.46235	19.4447	4.28131	20.431	4.35269	22.4952	4.49155	-0.181044	0.138857
Inpp5b	-0.174722	1	0.1043	200.772	183.896	189.338	169.895	179.913	186.491	45.0132	43.2015	45.338	47.9935	44.8967	48.0196	191.335	7.57996	178.766	7.48193	44.5176	5.4763	46.9699	5.55367	-0.0980272	0.0773621
Kat8	-0.241142	1	0.104718	95.6325	105.787	101.452	86.2233	84.1851	82.7123	14.9394	15.5646	15.0954	13.7785	15.2669	15.9528	100.957	6.6576	84.3736	6.39872	15.1998	3.92598	14.9994	3.90683	-0.258878	-0.0191437
Fam122b	0.698827	1	0.104974	1.39814	1.73897	3.17487	3.46352	2.98529	2.41748	13.4433	12.7954	14.9657	11.7441	10.6548	13.2659	2.10399	1.07313	2.95543	1.56337	13.7348	3.77976	11.8882	3.57146	0.490238	-0.208298
Pde4a	-0.447818	1	0.105113	7.54993	7.53552	9.23599	4.19268	6.96567	6.56173	12.912	12.3589	15.4585	13.686	11.7077	14.9701	8.10715	3.01919	5.90669	2.56235	13.5765	3.76304	13.4546	3.75003	-0.456844	-0.0130071
Bloc1s6	0.345847	1	0.105361	23.0692	20.7227	29.0068	28.6196	22.2901	30.5638	19.1024	19.1522	18.2338	15.7898	16.6861	17.7339	24.2662	4.60088	27.1579	4.7633	18.8295	4.23492	16.7366	4.06493	0.16242	-0.169988
Zfp668	-0.368706	1	0.105361	13.8415	12.7524	11.545	9.11452	10.747	9.32456	12.0989	10.872	10.6861	11.0274	11.0554	10.8783	12.713	3.66823	9.72871	3.28225	11.219	3.48787	10.987	3.45773	-0.385983	-0.0301433
Akt1	-0.301045	1	0.106449	111.012	121.583	106.07	86.9525	85.9763	72.179	185.636	170.085	165.349	166.058	155.256	142.7	112.888	6.81875	81.7026	6.35231	173.69	7.44037	154.671	7.27306	-0.466439	-0.167307
Eef1b2	-0.28664	1	0.106525	1889.72	2087.49	1943.31	1769.31	1820.03	1363.8	326.172	373.276	342.058	320.719	380.209	358.884	1973.5	10.9465	1651.05	10.6892	347.169	8.43949	353.271	8.46463	-0.257378	0.0251361
Acsl4	-0.296945	1	0.106548	232.23	239.833	215.603	219.842	215.14	198.406	34.3562	29.8809	32.3435	36.2956	35.043	37.5789	229.222	7.8406	211.129	7.72198	32.1935	5.0087	36.3058	5.18213	-0.118618	0.17343
Polr1b	-0.161998	1	0.1067	394.694	340.403	320.229	381.534	338.333	322.043	58.9226	52.5253	51.8482	66.2106	57.8061	56.449	351.775	8.45851	347.303	8.44005	54.432	5.76638	60.1552	5.91062	-0.0184587	0.144234
Ints7	-0.179069	1	0.106938	161.065	164.767	160.042	150.39	152.051	138.487	39.8636	38.2702	40.2803	41.4972	37.7897	42.1083	161.958	7.33948	146.976	7.19943	39.4714	5.30273	40.4651	5.33861	-0.140044	0.0358709
Lrrk1	-0.343668	1	0.106938	31.7377	28.4031	40.6961	28.4373	25.4745	29.0097	10.3535	11.0357	10.323	11.5822	10.0254	12.0989	33.6123	5.07092	27.6405	4.78871	10.5707	3.402	11.2355	3.48999	-0.282205	0.0879947
Mtif2	-0.285032	1	0.107098	50.4727	59.7045	51.3752	50.1299	44.7793	47.3135	23.7317	23.7629	23.888	23.6731	25.0749	27.8752	53.8508	5.7509	47.4076	5.56705	23.7942	4.57254	25.541	4.67475	-0.183851	0.102207
Ankrd9	-0.428965	1	0.10712	7.54993	10.2889	9.52461	5.83329	8.35881	5.18031	13.324	13.9822	10.6601	12.6919	12.8979	10.5635	9.12114	3.18921	6.45747	2.69097	12.6554	3.66169	12.0511	3.5911	-0.498246	-0.070589
Hint1	0.304096	1	0.107314	205.386	188.968	226.282	231.873	249.57	251.936	141.675	156.021	147.141	142.848	150.335	132.236	206.879	7.69264	244.46	7.93345	148.279	7.21217	141.806	7.14778	0.240813	-0.0643912
Upf2	-0.316666	1	0.107497	101.924	110.279	87.5976	102.812	88.3645	90.6555	21.7152	20.8846	21.1906	22.5172	25.6013	26.3475	99.9337	6.6429	93.9439	6.55373	21.2635	4.4103	24.822	4.63355	-0.0891718	0.223241
Skiv2l2	-0.28795	1	0.107521	590.433	574.729	490.373	548.147	507.499	525.284	59.4213	54.0326	54.2085	66.6268	61.8345	66.9127	551.845	9.10812	526.977	9.0416	55.8875	5.80445	65.1247	6.02513	-0.0665239	0.220679
Slc25a15	-0.334247	1	0.107521	19.1545	21.1574	23.3786	13.3072	20.499	13.4688	14.2889	14.3164	14.8101	12.8306	13.0582	14.4251	21.2302	4.40804	15.7583	3.97804	14.4718	3.85517	13.438	3.74824	-0.430001	-0.106929
Stt3b	-0.320411	1	0.107706	162.324	227.66	207.088	161.692	172.749	162.144	76.4639	78.5935	83.2839	84.0348	80.7065	83.5411	199.024	7.6368	165.528	7.37093	79.4471	6.31192	82.7608	6.37088	-0.265866	0.0589525
Mrpl44	-0.230947	1	0.107806	79.9734	80.1374	76.6298	72.5516	66.8704	63.8905	14.6141	14.7052	15.2251	15.5123	14.8435	14.4097	78.9135	6.3022	67.7708	6.08259	14.8481	3.89221	14.9219	3.89935	-0.219608	0.0071469
Ska3	-0.223212	1	0.107833	70.6059	64.4867	61.3327	63.9839	59.3077	57.1561	18.4519	16.2193	16.2885	19.0957	17.4643	17.9028	65.4751	6.03287	60.1493	5.91047	16.9866	4.08632	18.1542	4.18223	-0.122399	0.09591
Trpc4ap	-0.174704	1	0.108299	209.021	201.141	200.161	191.587	188.073	178.893	41.1429	39.9549	37.4272	38.5843	41.5549	41.9932	203.441	7.66847	186.185	7.54059	39.5083	5.30408	40.7108	5.34734	-0.127877	0.043255
Pnpo	0.297473	1	0.108404	149.041	140.277	169.856	168.619	177.326	171.296	55.7895	59.5709	54.1566	51.415	52.4043	51.7737	153.058	7.25793	172.413	7.42973	56.5057	5.82032	51.8643	5.69667	0.171795	-0.123654
Mlh3	0.337621	1	0.108698	20.1332	22.0269	21.7912	18.0467	25.2754	34.3627	9.82225	10.9743	12.3979	10.1027	10.1169	11.5923	21.3171	4.41394	25.895	4.6946	11.0648	3.46791	10.604	3.40653	0.280662	-0.0613785
Lysmd2	-0.3204	1	0.108736	25.8655	32.1709	33.6248	19.8697	28.0617	23.1387	10.6028	11.0357	11.4642	10.6575	11.3186	10.0645	30.5537	4.93328	23.69	4.56621	11.0342	3.46391	10.6802	3.41687	-0.367068	-0.0470459
Gna15	-0.254593	1	0.108765	46.8375	43.1844	51.0866	37.3695	38.0127	37.8163	20.6744	20.1753	19.2194	18.7258	19.1466	19.7683	47.0362	5.5557	37.7328	5.23775	20.023	4.32359	19.2136	4.26405	-0.31795	-0.0595352
Nsun2	-0.274712	1	0.108766	1051.26	912.668	861.833	910.358	815.979	723.172	264.735	254.81	248.166	269.512	264.883	269.063	941.92	9.87946	816.503	9.67331	255.903	7.99946	267.819	8.06512	-0.206146	0.0656612
Uck2	-0.307321	1	0.109095	210.419	211.574	195.976	173.176	173.147	126.572	63.4435	53.3301	50.4735	58.3273	50.5617	48.0503	205.99	7.68643	157.632	7.30041	55.749	5.80087	52.3131	5.7091	-0.386017	-0.0917741
Gmps	-0.294752	1	0.10926	495.08	494.301	398.158	476.325	424.906	401.992	55.9846	51.9387	51.3813	61.0321	60.2781	61.8305	462.513	8.85335	434.408	8.76291	53.1016	5.73068	61.0469	5.93185	-0.0904443	0.201164
Arhgef25	0.252184	1	0.109577	34.534	28.8379	35.2122	38.0987	32.2411	34.8808	15.8934	15.6737	16.3663	14.3102	13.6762	15.0239	32.8613	5.03832	35.0735	5.13231	15.9778	3.998	14.3367	3.84165	0.0939909	-0.156351
Sccpdh	-0.23132	1	0.109577	81.0919	96.0779	96.112	65.4422	85.5783	80.1222	19.5361	22.1873	22.0465	20.0897	21.7102	21.5033	91.0939	6.50928	77.0476	6.26768	21.2566	4.40984	21.1011	4.39924	-0.241606	-0.0105978
Slc25a46	-0.282654	1	0.109661	25.8655	31.3014	33.0475	27.7081	22.4892	26.7649	22.0513	20.2571	22.1243	23.3263	21.0922	22.7239	30.0715	4.91032	25.6541	4.68112	21.4776	4.42476	22.3808	4.48419	-0.229207	0.0594308
Eif2s1	-0.172595	1	0.10992	177.563	173.752	158.311	164.244	162.002	166.461	110.506	112.696	107.898	114.343	121.666	124.674	169.875	7.40833	164.235	7.35962	110.367	6.78616	120.228	6.90963	-0.048711	0.123465
Pogz	-0.317387	1	0.10992	63.1957	75.79	63.786	72.187	63.8852	59.2282	14.6575	12.8568	13.1242	15.8129	15.6217	17.0583	67.5906	6.07875	65.1001	6.02459	13.5461	3.75981	16.1643	4.01474	-0.054162	0.254928
Rragc	-0.234647	1	0.10998	76.7577	85.2094	84.4227	69.0881	72.642	71.661	44.005	43.9177	42.9258	45.959	44.8853	42.7532	82.1299	6.35984	71.1303	6.15239	43.6162	5.44679	44.5325	5.47679	-0.207443	0.0299956
Polr2b	0.154501	1	0.11006	545.692	501.837	510.721	613.225	561.035	657.036	64.777	59.6664	65.4133	69.8402	63.9403	66.5442	519.417	9.02075	610.432	9.25369	63.2855	5.9838	66.7749	6.06123	0.232938	0.0774299
Gtpbp2	0.378597	1	0.1103	8.52863	8.11518	9.81324	9.11452	10.9461	12.6054	10.6679	12.1952	13.176	10.7037	10.9295	12.7745	8.81902	3.14062	10.8887	3.44476	12.013	3.58653	11.4692	3.5197	0.304138	-0.0668293
Rpl14	-0.430716	1	0.110547	10.2064	13.6219	15.5857	9.66139	12.1402	8.2885	414.009	472.216	435.769	403.968	496.679	458.777	13.138	3.71567	10.03	3.32625	440.664	8.78354	453.141	8.82382	-0.389422	0.0402811
Hace1	-0.322345	1	0.11065	36.2117	38.692	35.7895	33.3591	35.0274	24.6928	15.7091	16.1716	15.0176	14.8419	16.6746	17.3423	36.8977	5.20546	31.0264	4.95543	15.6327	3.9665	16.2863	4.02559	-0.250034	0.0590862
Ercc6l2	-0.299962	1	0.110744	17.4767	17.8244	21.6468	16.953	14.9264	17.095	14.2997	13.7025	13.9801	15.3736	14.0309	15.4922	18.9827	4.24661	16.3248	4.029	13.9941	3.80675	14.9656	3.90358	-0.217614	0.0968283
Samhd1	-0.289825	1	0.110841	233.069	249.252	238.26	193.046	236.236	233.632	42.6932	49.1491	51.9001	50.6058	52.7362	57.3241	240.194	7.90805	220.971	7.78771	47.9141	5.58238	53.5554	5.74296	-0.12034	0.160581
Eif4e2	0.297937	1	0.110926	142.33	154.913	158.022	163.332	176.729	174.577	67.6716	65.9413	64.3239	65.2397	62.052	54.998	151.755	7.2456	171.546	7.42245	65.979	6.04393	60.7632	5.92513	0.17685	-0.118808
Mapk8ip3	0.398316	1	0.111251	9.08788	7.10078	8.94736	10.7551	9.95096	10.5333	13.118	12.5089	11.9051	12.0446	11.0325	12.5058	8.37868	3.06672	10.4131	3.38033	12.5107	3.64509	11.861	3.56815	0.31361	-0.0769392
Poldip2	-0.182837	1	0.111251	115.206	118.25	122.81	94.6087	101.898	99.8073	50.5098	53.5824	50.5513	48.5252	47.9066	49.8544	118.755	6.89185	98.7713	6.62602	51.5479	5.68784	48.7621	5.60769	-0.265828	-0.0801532
Clasp2	-0.300552	1	0.111592	83.3289	76.8044	69.8472	78.7494	62.094	63.8905	17.4762	15.9942	18.0263	18.4021	17.2354	20.3747	76.6601	6.2604	68.2446	6.09264	17.1656	4.10145	18.6708	4.22271	-0.167761	0.121261
Ckap5	-0.318153	1	0.111758	318.495	310.406	259.041	320.466	272.059	281.636	34.8224	31.6952	33.6663	38.8155	38.7739	44.803	295.981	8.20936	291.387	8.18679	33.3946	5.06154	40.7975	5.35041	-0.022564	0.288863
E2f8	-0.257905	1	0.111971	81.5113	73.7612	76.4855	69.0881	63.2881	56.2927	28.9897	28.3531	29.8276	28.551	26.288	29.7714	77.2527	6.27151	62.8896	5.97475	29.0568	4.86081	28.2035	4.8178	-0.296763	-0.043005
Naa60	0.358032	1	0.111983	11.6045	11.3033	15.4414	13.4895	16.1206	13.9868	32.1229	34.1302	31.0726	27.6032	28.5196	30.2627	12.7831	3.67616	14.5323	3.86119	32.4419	5.01979	28.7952	4.84776	0.185027	-0.17203
Ing1	0.331592	1	0.112363	13.7017	13.6219	15.73	16.7707	15.9215	16.9224	28.6645	27.4187	30.1389	28.4123	25.4296	25.2727	14.3512	3.8431	16.5382	4.04773	28.7407	4.84502	26.3715	4.72091	0.204628	-0.124113
Cul2	-0.299716	1	0.112406	159.527	182.302	145.467	138.723	157.026	157.481	27.2551	26.7367	27.3377	31.672	31.0489	30.5084	162.432	7.34369	151.077	7.23914	27.1098	4.76074	31.0764	4.95775	-0.104553	0.197005
Mtmr1	-0.280515	1	0.112475	31.7377	37.6776	33.7691	26.7967	31.8431	23.6568	19.1133	18.3405	18.1041	18.2172	17.6817	17.6417	34.3948	5.10412	27.4322	4.7778	18.5193	4.21096	17.8469	4.1576	-0.326321	-0.0533572
Carm1	-0.30049	1	0.112492	161.624	177.085	171.732	136.718	141.901	114.658	69.4387	70.7294	70.056	69.609	62.8645	66.5596	170.147	7.41064	131.092	7.03444	70.0747	6.13082	66.3444	6.0519	-0.376202	-0.0789199
Cdk4	-0.277311	1	0.11271	509.9	490.534	561.086	413.252	390.476	404.064	162.891	164.731	158.294	155.123	152.463	148.227	520.507	9.02377	402.597	8.65319	161.972	7.3396	151.938	7.24734	-0.370579	-0.0922596
Rfc1	-0.288633	1	0.112793	146.664	147.088	135.509	138.358	126.178	133.997	35.2885	31.7361	37.09	39.5322	36.0616	42.0546	143.087	7.16075	132.845	7.0536	34.7049	5.11707	39.2161	5.29337	-0.107154	0.176307
Taf6l	-0.288505	1	0.112847	45.4394	39.2717	50.365	37.9164	35.4254	36.9529	11.6002	12.3657	13.7985	13.0387	12.2799	12.3753	45.0254	5.49267	36.7649	5.20026	12.5881	3.65399	12.5646	3.6513	-0.292409	-0.00269651
Cdc27	-0.273455	1	0.112886	119.96	112.743	99.8641	101.9	107.072	102.225	37.4134	33.605	35.7932	41.4279	37.6066	41.6631	110.856	6.79254	103.732	6.69672	35.6039	5.15396	40.2325	5.33029	-0.0958156	0.176328
Hipk3	-0.292953	1	0.113013	61.7976	65.2113	67.6825	49.2184	59.5067	48.8676	35.5379	32.8001	34.3147	36.365	31.0718	34.3008	64.8971	6.02008	52.5309	5.71509	34.2176	5.09667	33.9125	5.08375	-0.304988	-0.0129201
Armc1	-0.25728	1	0.113072	63.755	77.6739	84.4227	57.0569	62.8901	70.2796	45.9239	48.1123	49.3064	47.1381	48.021	49.6855	75.2839	6.23427	63.4088	5.98661	47.7809	5.57836	48.2815	5.5934	-0.247656	0.015039
Ryk	-0.348253	1	0.113311	14.261	16.6651	19.4822	14.7655	13.1353	10.3606	58.9985	60.1234	61.3152	58.3042	58.55	57.1322	16.8027	4.07063	12.7538	3.67286	60.1457	5.91039	57.9955	5.85787	-0.39777	-0.0525221
Vapb	-0.267531	1	0.113638	38.4487	44.4886	37.9541	30.9894	34.2313	33.4994	44.8072	49.8107	50.0067	47.3693	47.2085	47.4592	40.2971	5.33261	32.9067	5.04031	48.2082	5.59121	47.3456	5.56516	-0.292298	-0.0260464
Nisch	-0.163562	1	0.114019	265.646	261.715	281.409	252.108	238.425	243.993	64.3867	62.8652	64.2202	63.6907	63.5855	67.5729	269.59	8.07462	244.842	7.93571	63.824	5.99603	64.9497	6.02125	-0.138916	0.0252238
Trmt61a	-0.245421	1	0.114617	47.257	46.9521	40.5518	40.1039	40.998	31.5999	20.2299	21.7986	19.8678	20.8295	21.0578	19.1388	44.9203	5.4893	37.5672	5.2314	20.6321	4.36682	20.342	4.34639	-0.257892	-0.0204257
Rpl35a	-0.495182	1	0.114911	14.5406	22.0269	18.3277	14.2186	16.1206	11.742	77.3746	105.842	125.354	109.696	118.05	103.279	18.2984	4.19365	14.0271	3.81014	102.857	6.68449	110.341	6.78583	-0.383502	0.101339
Mettl16	-0.294003	1	0.114962	160.646	173.172	157.589	140.91	139.114	154.028	44.3844	53.371	52.4707	47.9472	55.8033	58.8135	163.802	7.35581	144.684	7.17676	50.0754	5.64603	54.188	5.7599	-0.179048	0.113872
Ankrd46	-0.281049	1	0.115181	25.3063	23.1862	22.2241	20.9634	19.9019	16.577	11.4918	11.3085	10.8417	11.4204	10.6891	10.9474	23.5722	4.55901	19.1474	4.25908	11.214	3.48723	11.019	3.46192	-0.299935	-0.0253108
Tfpi	-0.186293	1	0.1152	129.887	128.249	121.367	118.124	112.048	123.637	26.6914	25.1816	26.0927	29.4989	26.597	26.8388	126.501	6.983	117.936	6.88186	25.9885	4.6998	27.6449	4.78894	-0.101139	0.0891365
Arfip1	-0.264853	1	0.115473	42.3635	48.4013	48.056	40.833	41.794	38.6797	14.007	12.5158	14.1876	14.7494	13.596	14.2485	46.2736	5.53212	40.4356	5.33755	13.5701	3.76236	14.198	3.82762	-0.194564	0.0652546
Reps1	-0.411155	1	0.115473	59.4208	50.575	46.1799	41.1976	49.9538	25.9016	23.8618	18.7907	18.2338	21.1532	19.9706	18.3864	52.0586	5.70206	39.0177	5.28606	20.2954	4.34308	19.8367	4.3101	-0.416008	-0.0329785
Ezr	-0.288421	1	0.115526	168.056	161.869	161.774	152.942	140.508	130.199	34.7356	34.0551	32.2916	32.9897	37.103	35.936	163.9	7.35667	141.216	7.14176	33.6941	5.07443	35.3429	5.14335	-0.21491	0.0689235
Asrgl1	-0.247119	1	0.115553	107.237	106.946	105.204	88.2285	93.539	76.3233	21.8778	22.9308	20.3865	20.0204	20.9548	21.2576	106.462	6.7342	86.0303	6.42677	21.7317	4.44173	20.7443	4.37464	-0.307427	-0.0670879
Ticrr	-0.340898	1	0.11585	48.5153	47.097	42.7164	50.3121	38.0127	41.7878	17.3245	16.3148	15.6141	18.4484	17.9678	22.0867	46.1096	5.527	43.3709	5.43866	16.4178	4.03719	19.501	4.28547	-0.08834	0.248286
Morc3	-0.279769	1	0.115949	88.3622	91.0059	79.2275	89.5046	77.6175	74.9418	17.8015	17.8426	18.5969	20.0204	19.4556	21.8641	86.1985	6.42959	80.688	6.33428	18.0803	4.17635	20.4467	4.3538	-0.0953097	0.177447
Hbp1	0.319965	1	0.116031	53.4088	41.1556	43.5823	53.2288	54.9293	63.3725	9.80057	10.1899	12.1385	10.1489	9.78503	11.7765	46.0489	5.52509	57.1769	5.83736	10.7097	3.42084	10.5701	3.40192	0.312265	-0.0189201
Wtap	-0.255892	1	0.116517	34.3941	31.0116	37.0883	32.0831	32.0421	30.9092	37.5977	36.2718	36.0266	43.1155	39.2889	39.4905	34.1647	5.09443	31.6781	4.98542	36.6321	5.19503	40.6316	5.34453	-0.109018	0.149497
Srp19	0.242382	1	0.116523	50.8921	46.2275	42.7164	56.51	56.9195	53.0119	49.8376	53.1459	49.6695	50.1897	52.7591	50.3918	46.612	5.54263	55.4805	5.79391	50.8843	5.66915	51.1135	5.67563	0.251277	0.00648317
Apba3	0.479491	1	0.117125	6.71105	3.62285	8.08149	6.01558	6.96567	8.2885	11.34	11.2812	13.7726	10.0333	9.84225	10.1874	6.13846	2.61788	7.08992	2.82577	12.1313	3.60066	10.021	3.32495	0.207891	-0.275708
Zfp800	-0.252489	1	0.117519	42.3635	44.4886	38.2428	41.3799	39.4058	37.1256	19.6553	17.488	18.0522	20.5521	20.4627	20.5974	41.6983	5.38192	39.3038	5.2966	18.3985	4.20152	20.5374	4.36018	-0.0853206	0.158666
Zkscan3	0.312549	1	0.117519	20.972	19.2736	24.966	25.8852	29.8529	30.9092	10.5703	11.4108	10.5564	10.4032	11.4445	13.2889	21.7372	4.44209	28.8824	4.85212	10.8458	3.43907	11.7122	3.54994	0.410026	0.110869
Letm1	-0.284043	1	0.117641	91.9973	109.12	95.9677	94.0618	83.7871	74.2511	40.9586	40.2482	41.5512	43.9015	40.914	41.7705	99.0284	6.62977	84.0334	6.39289	40.9193	5.35471	42.1954	5.39901	-0.23688	0.0443023
Eif3f	-0.260113	1	0.117784	1177.09	1229.16	1111.78	970.332	981.762	806.747	272.15	264.734	260.278	250.417	262.205	235.208	1172.68	10.1956	919.614	9.84488	265.721	8.05377	249.276	7.9616	-0.350707	-0.0921649
Sec61g	0.912501	1	0.117985	0.559254	1.44914	2.16468	2.73436	1.39313	4.14425	10.7654	12.8636	14.0579	14.264	14.6032	11.3389	1.39103	0.476149	2.75725	1.46323	12.5623	3.65103	13.402	3.74438	0.987079	0.0933473
Rexo1	-0.305905	1	0.117997	18.3156	20.5778	18.3277	12.7603	17.1157	15.7136	31.6133	32.1249	32.8623	32.2037	30.6254	32.1589	19.0737	4.25351	15.1965	3.92567	32.2002	5.009	31.6627	4.98471	-0.327841	-0.0242843
Chd7	-0.324287	1	0.118359	92.277	94.1941	71.2903	93.3327	70.2538	65.4446	18.1701	17.2697	17.4038	20.6908	18.3798	19.346	85.9204	6.42493	76.3437	6.25444	17.6145	4.13869	19.4722	4.28335	-0.170492	0.144653
Reep6	0.239356	1	0.118359	49.0746	45.3581	53.3956	48.307	50.9489	46.6228	29.1415	29.9491	32.3695	25.5919	24.7544	25.9713	49.2761	5.62281	48.6262	5.60366	30.4867	4.93011	25.4392	4.66898	-0.0191523	-0.261127
Erap1	-0.280281	1	0.118574	144.148	147.088	127.283	142.186	113.242	109.132	13.9853	11.8678	12.6573	14.6338	12.6004	13.1353	139.506	7.12419	121.52	6.92505	12.8368	3.68221	13.4565	3.75023	-0.199135	0.0680193
Ak3	-0.281416	1	0.11866	115.067	122.452	126.273	95.7024	105.281	87.5473	53.3394	55.1034	55.635	51.3918	51.1111	55.4817	121.264	6.92201	96.177	6.58762	54.6926	5.77327	52.6615	5.71868	-0.334389	-0.0545966
Npepl1	-0.335702	1	0.118862	28.3822	26.6642	30.017	23.1509	25.6735	14.3322	25.5313	24.8269	23.8102	23.5575	23.4955	21.58	28.3544	4.8255	21.0522	4.3959	24.7228	4.62777	22.8777	4.51587	-0.429604	-0.111903
Dimt1	-0.387898	1	0.118873	9.2277	12.3177	12.6995	8.74994	12.3392	7.94315	10.5269	10.3536	10.8417	11.1661	12.2914	11.3773	11.415	3.51285	9.67742	3.27462	10.5741	3.40246	11.6116	3.53749	-0.23823	0.135033
Nup98	-0.304436	1	0.119136	399.028	376.052	327.589	413.435	363.011	310.819	37.7387	34.4575	36.1563	44.1327	41.2917	45.7472	367.556	8.52182	362.421	8.50152	36.1175	5.17463	43.7239	5.45035	-0.0202965	0.275723
Sf3b3	-0.269386	1	0.11921	796.658	746.741	698.472	717.13	734.58	660.835	125.423	109.804	114.797	140.42	124.619	132.605	747.29	9.54552	704.182	9.4598	116.675	6.86635	132.548	7.05037	-0.0857208	0.184018
Ttc7	-0.347584	1	0.119228	25.1664	24.6354	21.0696	15.1301	20.698	13.9868	22.8102	20.1343	19.4528	19.2575	17.1782	18.8624	23.6238	4.56217	16.605	4.05354	20.7991	4.37845	18.4327	4.20419	-0.508625	-0.174255
Rab1b	0.185078	1	0.119315	100.945	99.7008	113.862	102.447	111.65	105.851	44.7639	47.9145	46.5311	40.873	42.4476	41.3637	104.836	6.71199	106.649	6.73673	46.4032	5.53615	41.5614	5.37717	0.024738	-0.158978
Rbck1	0.278982	1	0.119447	32.7164	40.1412	41.9949	38.8279	41.197	40.0611	55.3667	55.7923	51.6148	47.4155	46.5218	46.7145	38.2841	5.25867	40.0286	5.32296	54.2579	5.76176	46.8839	5.55102	0.0642856	-0.21074
Calm3	0.291402	1	0.120056	426.711	422.859	523.854	469.215	498.742	512.678	268.551	253.037	268.423	250.717	225.857	220.322	457.808	8.8386	493.545	8.94704	263.337	8.04076	232.299	7.85984	0.10844	-0.180927
Pip5k1a	-0.239049	1	0.12019	69.0679	62.0232	59.3124	53.4111	54.1332	47.6589	25.5313	24.52	24.0437	24.5747	22.3969	24.1288	63.4678	5.98795	51.7344	5.69305	24.6983	4.62634	23.7001	4.56682	-0.294901	-0.0595193
Usf2	-0.338664	1	0.120563	15.9387	14.7812	13.2767	11.302	10.15	9.32456	27.2009	24.9633	25.7036	24.4129	22.9004	21.3497	14.6656	3.87436	10.2588	3.3588	25.9559	4.69799	22.8877	4.5165	-0.515564	-0.181495
Stom	0.169803	1	0.12066	155.193	172.448	157.012	178.827	168.967	180.102	56.1364	54.8784	52.9894	53.3106	52.6217	53.1709	161.551	7.33584	175.965	7.45915	54.6681	5.77263	53.0344	5.72886	0.123304	-0.0437695
Nfat5	0.331778	1	0.120704	13.8415	13.3321	16.0187	18.4113	19.5039	16.4043	10.7871	10.1763	9.83015	9.98708	9.71636	11.0626	14.3974	3.84774	18.1065	4.17844	10.2645	3.35959	10.2553	3.3583	0.330697	-0.0012927
Amfr	-0.306823	1	0.120875	156.591	174.476	156.435	136.171	143.692	106.887	100.673	93.7829	85.333	93.9063	87.2413	91.2641	162.501	7.3443	128.917	7.01029	93.2628	6.54323	90.8039	6.50468	-0.334008	-0.038548
Chd9	-0.261405	1	0.121453	33.4154	33.1853	29.7283	32.63	25.4745	27.6283	12.2399	9.65111	10.6601	12.8075	10.2314	11.5385	32.1097	5.00494	28.5776	4.83681	10.8504	3.43967	11.5258	3.52679	-0.168125	0.0871222
Kdelc1	-0.23571	1	0.121551	37.7497	35.359	40.6961	32.2654	30.848	39.3704	10.18	10.3468	12.0607	11.2586	10.815	12.5519	37.9349	5.24545	34.1612	5.09429	10.8625	3.44129	11.5418	3.5288	-0.151166	0.0875137
Ice1	-0.28212	1	0.121767	38.1691	32.6056	42.7164	37.3695	37.6146	30.5638	26.2794	24.2267	25.0293	28.4817	27.4324	29.3031	37.8304	5.24147	35.1827	5.13679	25.1784	4.65412	28.4057	4.82811	-0.104681	0.173992
Cd99l2	0.272894	1	0.122281	24.1877	22.3167	22.3684	26.4321	22.2901	26.0742	18.9615	19.084	19.375	16.7838	16.3313	18.609	22.9576	4.5209	24.9322	4.63994	19.1402	4.25853	17.2414	4.1078	0.119034	-0.150727
Smn1	-0.171734	1	0.12252	161.485	172.592	145.611	151.301	164.987	134.17	38.4325	39.9481	36.0525	39.7402	41.7037	39.0836	159.896	7.32099	150.153	7.23029	38.1444	5.2534	40.1758	5.32826	-0.0907046	0.0748575
Ankrd13a	-0.303032	1	0.12263	171.691	144.479	151.528	131.978	121.402	96.1811	166.122	159.295	163.196	154.938	144.83	149.648	155.899	7.28447	116.52	6.86444	162.871	7.34758	149.805	7.22695	-0.420033	-0.120639
Taf10	0.645921	1	0.12263	7.68975	9.85415	11.112	6.92703	11.9412	17.9584	78.5129	70.1974	68.7332	64.2918	61.7315	51.6739	9.55198	3.2558	12.2755	3.61771	72.4812	6.17953	59.2324	5.88831	0.361914	-0.29122
Gpatch4	-0.244167	1	0.12272	59.281	59.1249	61.7657	52.135	55.7254	51.2851	36.9147	39.2183	36.6231	35.3709	42.15	40.358	60.0572	5.90826	53.0485	5.72924	37.5854	5.2321	39.293	5.2962	-0.179024	0.0640988
Crkl	-0.261786	1	0.122727	58.5819	56.0817	49.9321	44.8434	48.5607	46.1048	29.521	30.3106	29.2311	29.9843	28.5883	31.8135	54.8652	5.77782	46.503	5.53925	29.6876	4.89179	30.1287	4.91307	-0.238569	0.0212808
Atad2b	-0.295027	1	0.122832	29.7803	30.287	27.5637	28.0727	31.445	24.5201	17.8665	15.435	16.8591	19.558	18.5172	20.4055	29.2103	4.86841	28.0126	4.80801	16.7202	4.06352	19.4936	4.28493	-0.0604005	0.221406
Fam178a	0.269268	1	0.122832	52.4301	51.5894	48.056	63.9839	63.8852	57.8468	29.5426	26.9413	31.1504	31.0247	26.5169	30.9844	50.6918	5.66368	61.9053	5.95199	29.2114	4.86846	29.5086	4.88307	0.28831	0.0146034
Dph6	-0.226007	1	0.122851	67.6698	70.5731	76.1969	58.8798	64.8803	70.4522	13.6709	14.4528	14.032	14.3333	14.626	16.0142	71.4799	6.15947	64.7374	6.01653	14.0519	3.81269	14.9912	3.90604	-0.142938	0.0933505
Cetn2	-0.173001	1	0.122858	164.421	171.723	182.411	161.145	158.419	158.345	25.4121	27.18	27.7527	27.4645	28.5998	27.4529	172.852	7.43339	159.303	7.31563	26.7816	4.74317	27.8391	4.79904	-0.11776	0.0558691
Adss	-0.284897	1	0.123015	358.762	400.832	318.642	321.196	338.134	311.337	66.8693	61.2147	62.223	72.8918	69.777	66.5289	359.412	8.48949	323.555	8.33787	63.4357	5.98722	69.7325	6.12376	-0.151625	0.136538
Arid1b	-0.24448	1	0.123101	61.2383	58.8351	54.983	54.6871	50.7499	52.4938	20.1974	17.1401	20.6718	21.3381	19.0894	21.1041	58.3521	5.86671	52.6436	5.71819	19.3365	4.27325	20.5105	4.35829	-0.148527	0.0850417
Vimp	0.301988	1	0.123163	89.7603	82.8908	100.441	110.468	106.873	116.384	19.0482	20.755	18.0003	17.1768	21.241	19.0927	91.0308	6.50828	111.242	6.79756	19.2679	4.26812	19.1702	4.26079	0.289273	-0.00733303
Fbxl3	0.251165	1	0.123206	34.534	37.5327	36.3667	40.1039	41.197	39.8884	25.759	22.8421	25.3665	23.9967	22.6715	22.6088	36.1445	5.1757	40.3964	5.33616	24.6559	4.62386	23.0923	4.52934	0.160453	-0.0945164
Gde1	0.300372	1	0.123248	43.2024	51.1546	51.3752	47.7601	53.7352	53.0119	31.7759	32.1249	26.5855	26.4935	25.567	26.1171	48.5774	5.60221	51.5024	5.68657	30.1621	4.91467	26.0592	4.70372	0.0843537	-0.210945
Kif3b	-0.25187	1	0.123248	32.8562	31.1565	31.1715	28.0727	27.4646	27.4557	13.9203	14.5346	16.1329	14.3795	15.0724	16.4518	31.728	4.98769	27.6643	4.78996	14.8626	3.89361	15.3012	3.93558	-0.197731	0.0419631
Phf12	-0.268302	1	0.123514	28.2423	26.2294	33.1918	24.2446	24.6784	22.1027	39.5492	38.3998	39.8653	39.1161	36.9771	38.7919	29.2212	4.86894	23.6752	4.56531	39.2714	5.29541	38.295	5.25908	-0.303637	-0.0363237
Ddx20	-0.282661	1	0.123536	200.213	182.592	159.176	193.228	186.083	159.036	25.8783	22.3783	20.4125	27.8112	27.9818	26.6622	180.66	7.49714	179.449	7.48743	22.8897	4.51663	27.4851	4.78058	-0.00970788	0.263951
Dctn2	-0.160412	1	0.123557	300.599	287.944	299.304	271.43	252.157	255.044	61.4704	65.2524	62.2749	60.0843	63.391	61.7461	295.949	8.2092	259.544	8.01983	62.9992	5.97726	61.7405	5.94814	-0.18937	-0.0291183
Atp5d	-0.286436	1	0.123772	627.204	632.549	696.451	499.658	535.76	441.19	125.998	128.718	127.351	122.203	122.937	106.042	652.068	9.34888	492.203	8.94311	127.356	6.99272	117.061	6.87111	-0.405771	-0.121606
Pi4ka	-0.286997	1	0.124202	153.375	141.291	132.046	132.343	118.018	131.58	26.377	26.116	25.4183	28.0887	25.8989	31.1686	142.237	7.15216	127.314	6.99224	25.9704	4.6988	28.3854	4.82708	-0.159914	0.128278
Tra2b	-0.292084	1	0.124202	221.465	268.091	217.479	209.087	213.946	216.537	79.7055	82.2493	88.4713	85.5143	93.5129	98.7876	235.678	7.88067	213.19	7.736	83.4754	6.38328	92.6049	6.53302	-0.144678	0.149738
Dhx32	-0.258029	1	0.124207	32.4368	35.5039	31.1715	28.8019	26.6686	25.2109	12.1531	12.5635	12.372	12.0446	11.5933	12.406	33.0374	5.04603	26.8938	4.7492	12.3629	3.62794	12.0146	3.58672	-0.296827	-0.0412219
Sema4d	-0.354199	1	0.124313	48.3755	44.0538	48.6332	41.5622	34.4303	26.2469	20.7178	15.3531	17.6372	20.8989	14.0767	14.5556	47.0209	5.55523	34.0798	5.09085	17.9027	4.16211	16.5104	4.0453	-0.464383	-0.116803
Rffl	-0.289764	1	0.124332	19.4341	19.7083	21.9355	15.1301	17.5137	14.8502	17.5955	16.5399	17.0147	15.8129	15.9078	16.6821	20.3593	4.34761	15.8313	3.98471	17.05	4.0917	16.1343	4.01206	-0.362904	-0.079646
Sdhc	0.157355	1	0.124665	273.475	281.278	294.253	269.243	311.067	299.94	85.0611	87.9786	87.797	78.6482	82.6864	81.0844	283.002	8.14467	293.417	8.19681	86.9456	6.44204	80.8063	6.3364	0.0521383	-0.105644
Eif2b3	-0.287543	1	0.124706	207.064	198.677	164.372	179.556	172.749	157.309	23.6992	23.0535	20.9053	23.4419	25.4869	24.6432	190.038	7.57014	169.871	7.4083	22.5527	4.49523	24.524	4.61612	-0.161843	0.120895
Chek2	-0.209618	1	0.124749	103.742	114.047	139.839	93.3327	96.9223	118.456	19.1241	21.3961	24.5105	19.165	21.2982	24.6892	119.209	6.89735	102.904	6.68515	21.6769	4.43809	21.7175	4.44078	-0.212199	0.00269584
Idh3b	-0.15389	1	0.12498	350.093	362.72	367.419	320.466	330.77	310.128	96.5963	103.768	98.7424	94.2068	101.02	100.83	360.077	8.49216	320.455	8.32398	99.7023	6.63956	98.6856	6.62477	-0.168186	-0.0147868
2810004N23Rik	0.313903	1	0.125095	60.8189	81.1518	66.095	69.4526	78.8116	101.879	20.089	21.9009	24.0955	18.9801	22.4999	22.2786	69.3552	6.11593	83.3812	6.38165	22.0285	4.4613	21.2529	4.40958	0.265718	-0.0517123
Tprn	-0.445856	1	0.125141	18.8748	25.0701	30.5942	23.1509	21.096	18.6491	18.1376	14.8075	15.3288	20.1129	16.6174	18.8086	24.8464	4.63496	20.9653	4.38993	16.0913	4.00821	18.513	4.21046	-0.245029	0.202257
Rbm27	-0.313899	1	0.125161	137.577	125.206	104.626	125.051	107.47	99.98	28.6211	25.0656	30.2426	34.7467	27.6499	31.9133	122.47	6.93628	110.834	6.79225	27.9765	4.80614	31.4366	4.97437	-0.144024	0.168233
Bcap29	-0.157479	1	0.125242	317.517	346.634	314.457	312.628	322.411	293.033	83.2289	76.9429	73.5835	84.7514	81.5763	80.7006	326.202	8.34962	309.357	8.27313	77.9184	6.28389	82.3428	6.36357	-0.0764931	0.0796773
Amz2	-0.355241	1	0.12542	12.4434	11.5931	11.545	6.19787	9.55292	11.0513	20.7937	22.542	21.5278	20.0666	21.1494	21.557	11.8605	3.56809	8.93404	3.15931	21.6211	4.43437	20.9243	4.38711	-0.40878	-0.0472607
Rps6ka3	-0.257937	1	0.125513	65.2929	77.8188	70.4244	65.26	60.5018	61.9911	20.9563	20.4208	20.6718	21.5693	20.5428	23.1922	71.1787	6.15337	62.5843	5.96773	20.683	4.37037	21.7681	4.44414	-0.185645	0.0737728
Hnrnpll	-0.282274	1	0.125517	170.852	174.476	183.854	138.358	151.454	134.343	55.7353	52.3206	57.1134	56.4316	52.1296	52.3648	176.394	7.46266	141.385	7.14348	55.0565	5.78284	53.642	5.74529	-0.319174	-0.0375484
Plekha3	-0.601157	1	0.12554	4.05459	5.07199	4.32937	3.28123	3.18431	1.03606	13.4541	13.4365	14.9138	11.9752	10.9867	11.7151	4.48532	2.16521	2.50053	1.32224	13.9348	3.80062	11.559	3.53095	-0.842975	-0.269675
Aarsd1	-0.286834	1	0.126673	198.955	195.054	218.489	172.082	176.331	159.381	28.5886	29.2739	31.9545	31.1403	30.7399	28.8732	204.166	7.6736	169.265	7.40314	29.939	4.90395	30.2511	4.91892	-0.270461	0.0149624
Vps37b	0.241935	1	0.126843	29.7803	28.548	29.4397	35.7289	32.6391	33.4994	40.2756	37.1721	35.2744	39.6709	36.7253	34.5311	29.256	4.87066	33.9558	5.08559	37.574	5.23166	36.9758	5.20851	0.214925	-0.0231551
Bcl2l1	0.277411	1	0.126992	25.0266	30.7218	27.9966	29.3488	34.2313	31.5999	24.9351	31.6611	26.7411	21.6155	28.5082	28.213	27.915	4.80297	31.7267	4.98762	27.7791	4.79593	26.1122	4.70665	0.184655	-0.0892736
Uhrf1bp1l	-0.337788	1	0.127185	24.3276	26.3743	18.3277	20.0519	21.6931	17.6131	19.1783	18.3883	18.0781	21.1301	18.5629	20.5283	23.0099	4.52418	19.786	4.30641	18.5482	4.21321	20.0738	4.32724	-0.21777	0.114029
Hmgcr	-0.255779	1	0.127609	1375.77	1148.01	984.931	1419.86	1221.38	1099.43	167.455	140.115	133.524	201.244	181.2	178.037	1169.57	10.1918	1246.89	10.2841	147.031	7.19998	186.827	7.54556	0.09236	0.345581
Vps54	-0.331526	1	0.128112	19.0146	21.1574	19.3378	16.7707	19.7029	12.2601	31.6675	26.1842	25.5739	30.9553	27.9131	26.1709	19.8366	4.3101	16.2446	4.02188	27.8086	4.79746	28.3464	4.8251	-0.288211	0.0276381
Ift20	0.287753	1	0.128426	56.6245	62.1681	77.0628	61.7964	81.5979	67.3441	21.8561	25.0793	24.3549	19.6736	22.2595	20.8738	65.2851	6.02868	70.2461	6.13435	23.7634	4.57067	20.9356	4.38789	0.105664	-0.182783
Ikzf1	-0.282311	1	0.128662	177.843	168.535	171.154	146.561	150.658	129.68	186.167	163.714	169.577	185.593	160.978	174.076	172.511	7.43054	142.3	7.15279	173.153	7.4359	173.549	7.4392	-0.277752	0.00329834
1810026J23Rik	0.248125	1	0.12874	53.8282	51.1546	60.1782	64.5308	59.9048	59.0556	52.3636	45.7388	45.2602	47.9935	43.1686	42.9451	55.0537	5.78277	61.1637	5.9346	47.7875	5.57856	44.7024	5.48228	0.151837	-0.0962825
Gnas	-0.271253	1	0.128921	562.19	577.047	651.714	472.314	503.121	458.458	277.43	266.753	257.607	251.018	266.508	257.579	596.984	9.22155	477.964	8.90076	267.263	8.06212	258.368	8.01328	-0.32079	-0.0488334
Churc1	0.290852	1	0.129227	82.9095	84.4848	92.5042	91.1452	96.9223	110.168	19.2867	20.7141	20.594	19.7199	20.2911	16.9815	86.6328	6.43684	99.4118	6.63535	20.1983	4.33616	18.9975	4.24774	0.198504	-0.0884248
Trip13	-0.246383	1	0.129241	81.0919	74.6307	65.8064	68.5412	66.6714	58.5375	27.9815	26.7571	22.7209	27.5338	25.9561	26.6008	73.843	6.20639	64.5834	6.01309	25.8198	4.69041	26.6969	4.7386	-0.193298	0.048193
Rxrg	0.272856	1	0.12934	22.0905	19.8532	25.5433	22.2394	24.0813	25.0382	18.9832	20.1616	20.1012	17.5467	16.6403	17.9718	22.4957	4.49158	23.7863	4.57206	19.7487	4.30368	17.3863	4.11988	0.0804835	-0.183806
Ggps1	0.307104	1	0.129365	14.261	16.5202	15.73	16.2238	18.3098	22.2753	9.77888	10.0945	12.2423	10.4032	10.1627	11.0549	15.5037	3.95454	18.9363	4.24308	10.7052	3.42024	10.5403	3.39784	0.28854	-0.0224026
Rabl6	-0.272162	1	0.130266	48.3755	49.8504	53.5399	41.1976	42.1921	35.9168	69.764	67.2441	62.3268	60.2692	63.597	64.9397	50.5886	5.66074	39.7688	5.31357	66.4449	6.05409	62.9353	5.9758	-0.347173	-0.0782895
Ube2g2	0.253734	1	0.13053	26.5646	29.9972	27.8523	32.2654	34.6293	30.9092	35.4837	35.1123	31.5913	35.6483	33.4064	30.493	28.138	4.81445	32.6013	5.02686	34.0625	5.09011	33.1826	5.05235	0.21241	-0.0377555
Pak1	-0.328629	1	0.130676	17.7563	18.4041	18.039	18.229	13.3343	11.0513	10.9714	10.2718	11.2826	10.2414	10.2886	11.1931	18.0665	4.17524	14.2049	3.82832	10.8419	3.43855	10.5743	3.4025	-0.346928	-0.0360559
Wdr60	-0.278019	1	0.131354	54.2477	63.3274	53.8285	45.9372	53.7352	56.8108	15.5031	16.6013	19.2972	18.2403	17.9106	20.3364	57.1345	5.83629	52.161	5.7049	17.1339	4.09878	18.8291	4.23489	-0.13139	0.136113
Btbd2	-0.291994	1	0.131447	23.7683	22.1718	25.8319	16.0416	17.7127	16.7497	14.7442	13.8458	16.055	13.7785	12.0739	12.5596	23.924	4.58039	16.8346	4.07336	14.8817	3.89547	12.804	3.67852	-0.507026	-0.216944
Man2a2	-0.287757	1	0.131464	74.5206	84.4848	92.9371	71.8224	69.2587	64.4085	82.0147	85.1822	83.4914	82.3009	79.4476	88.5388	83.9809	6.39199	68.4965	6.09796	83.5628	6.38479	83.4291	6.38248	-0.294029	-0.00230939
Ptov1	-0.279992	1	0.131566	59.7004	51.7343	64.9405	48.307	41.396	40.0611	25.1627	21.9554	24.718	23.3957	21.0235	19.6531	58.7917	5.87754	43.2547	5.43478	23.9454	4.58168	21.3574	4.41667	-0.442757	-0.165011
Cggbp1	-0.347833	1	0.13206	19.0146	31.0116	27.8523	17.1353	21.6931	23.3114	43.9724	46.5368	47.7501	45.7279	45.9839	49.3554	25.9595	4.69819	20.7133	4.37248	46.0865	5.52627	47.0224	5.55528	-0.325708	0.0290053
Dhx30	-0.275566	1	0.132075	73.8216	67.385	62.9202	64.3485	55.3273	57.5015	26.7456	28.0803	26.3002	26.4935	28.2793	30.3165	68.0422	6.08836	59.0591	5.88409	27.042	4.75713	28.3631	4.82594	-0.204271	0.0688117
Dclre1a	-0.28979	1	0.132183	27.2636	21.1574	22.9457	19.1405	18.1107	22.7934	16.9558	16.5808	18.13	18.8182	15.8506	18.7703	23.7889	4.57222	20.0149	4.323	17.2222	4.1062	17.813	4.15486	-0.249217	0.0486619
Cish	0.25977	1	0.132446	45.719	47.5318	52.0967	58.1506	60.1038	67.3441	27.266	30.7131	26.8189	28.5048	30.1333	32.3355	48.4492	5.5984	61.8662	5.95108	28.266	4.82099	30.3245	4.92241	0.352678	0.101419
Ints5	-0.234138	1	0.133024	82.6298	78.1086	74.0322	66.536	66.2734	57.8468	46.0973	47.0961	47.1536	45.3117	43.0999	45.3096	78.2569	6.29015	63.5521	5.98987	46.7823	5.54789	44.5738	5.47812	-0.300279	-0.0697692
Srprb	-0.285731	1	0.13319	63.8948	70.8629	82.4023	50.3121	70.4528	59.0556	22.6367	26.1092	22.4356	21.8698	25.1664	24.8121	72.3867	6.17765	59.9402	5.90545	23.7271	4.56847	23.9494	4.58192	-0.272201	0.0134534
Gcn1l1	-0.281814	1	0.133196	377.636	348.228	318.064	355.102	298.131	289.752	60.6247	52.8595	57.9953	64.0375	57.9892	65.4771	347.976	8.44285	314.328	8.29613	57.1598	5.83693	62.5013	5.96581	-0.146718	0.128884
Atpaf2	-0.292594	1	0.133565	72.004	86.9484	89.3293	67.6297	66.2734	59.0556	36.5787	33.489	32.9401	35.0472	31.8958	31.0688	82.7606	6.37087	64.3196	6.00719	34.3359	5.10165	32.6706	5.02992	-0.363686	-0.0717254
Ppp2r2d	-0.265703	1	0.133968	36.9108	39.4166	37.2326	33.906	34.4303	29.3551	33.6732	30.904	31.8767	36.8042	32.6511	30.255	37.8533	5.24235	32.5638	5.0252	32.1513	5.0068	33.2368	5.05471	-0.21715	0.0479046
Stag1	-0.280384	1	0.134146	137.716	146.943	124.542	124.14	123.392	125.191	33.6298	29.6968	30.5279	37.6596	31.6211	34.6386	136.4	7.0917	124.241	6.957	31.2848	4.96739	34.6398	5.11436	-0.134706	0.146966
Susd1	-0.296447	1	0.134467	21.5313	19.9981	25.1103	19.3228	19.7029	16.577	10.5703	10.0876	11.5939	11.5129	10.6205	10.7324	22.2133	4.47335	18.5342	4.21212	10.7506	3.42635	10.9553	3.45355	-0.261229	0.0272074
Nek6	-0.252574	1	0.13466	43.6218	48.9809	42.5721	36.2758	45.9734	31.2545	19.8505	20.1207	17.5594	19.8354	19.6273	17.7339	45.0583	5.49372	37.8346	5.24163	19.1769	4.26129	19.0655	4.25289	-0.252087	-0.00839965
Ube2h	0.348629	1	0.134743	15.5193	16.2304	16.0187	21.328	20.897	15.7136	37.1749	41.4486	47.0498	37.9601	39.0257	41.9394	15.9228	3.99302	19.3129	4.27149	41.8911	5.38857	39.6418	5.30895	0.27847	-0.0796243
Ak6	0.307698	1	0.134758	285.779	263.888	261.205	376.065	335.148	326.532	16.4463	19.5341	20.8015	18.2403	20.1308	20.0753	270.291	8.07837	345.915	8.43427	18.9273	4.2424	19.4822	4.28408	0.355906	0.0416834
Mcph1	-0.222303	1	0.134866	47.5366	45.2131	46.3243	41.3799	47.5656	46.1048	14.7659	14.5687	15.4066	16.2521	16.9607	17.2272	46.358	5.53475	45.0168	5.49239	14.9138	3.89857	16.8133	4.07153	-0.0423562	0.172963
Pex19	0.251352	1	0.134866	53.5486	52.8936	62.4872	58.6975	63.0891	66.6533	30.5292	30.3584	28.6086	28.944	27.5926	27.7677	56.3098	5.81531	62.8133	5.973	29.8321	4.89879	28.1015	4.81257	0.157684	-0.0862184
Prps2	-0.212893	1	0.134866	93.9547	93.4695	90.1952	82.9421	81.9959	75.8052	30.0413	27.5551	29.2829	29.5682	28.8286	28.5968	92.5398	6.532	80.2478	6.32639	28.9598	4.85598	28.9979	4.85788	-0.205613	0.00189636
Heca	-0.376006	1	0.134898	10.0666	9.56432	9.23599	7.6562	8.35881	7.25244	16.9558	13.9344	14.4469	16.8763	14.7519	15.4922	9.62229	3.26638	7.75581	2.95528	15.1124	3.91766	15.7068	3.97332	-0.311103	0.0556564
Ccdc82	0.25695	1	0.134966	46.8375	53.7631	43.7266	62.3433	56.3224	57.5015	15.9476	14.0026	12.9945	15.7666	14.1797	14.0028	48.1091	5.58824	58.7224	5.87584	14.3149	3.83945	14.6497	3.8728	0.287602	0.033356
Aida	1.11843	1	0.135018	0.699068	0.144914	0.865874	0.911452	1.39313	1.20874	23.9377	24.4381	25.0811	23.465	22.3053	23.1154	0.569952	-0.811088	1.17111	0.227875	24.4856	4.61386	22.9619	4.52117	1.03896	-0.0926933
Srp9	1.31444	1	0.135018	0.279627	0.289828	0.577249	1.09374	1.19412	0.518031	43.3436	40.9712	41.8884	43.3236	42.3446	36.65	0.382235	-1.38747	0.935296	-0.0965047	42.0677	5.39464	40.7727	5.34953	1.29096	-0.0451103
Otud4	-0.301448	1	0.135436	120.379	117.09	106.647	105.546	105.679	74.5965	66.6959	54.8033	57.2431	68.1757	56.3526	57.232	114.706	6.84179	95.2739	6.57401	59.5808	5.89677	60.5868	5.92093	-0.267782	0.024156
Focad	-0.233213	1	0.13549	111.991	112.018	97.5551	109.921	95.7282	100.671	15.3405	14.2414	14.8101	16.9457	15.8621	16.7051	107.188	6.744	102.107	6.67393	14.7973	3.88726	16.5043	4.04477	-0.0700672	0.157506
Acot7	-0.283213	1	0.135618	45.8589	45.9377	59.0237	33.906	41.595	49.3856	14.3539	15.6328	17.6891	16.1365	15.5645	16.3443	50.2734	5.65172	41.6289	5.37951	15.8919	3.99022	16.0151	4.00136	-0.272211	0.0111407
Reps2	-0.285497	1	0.135795	57.8828	56.2266	53.2512	52.8642	45.7744	41.0971	20.3167	18.4906	18.2078	18.8645	17.8305	20.9736	55.7869	5.80185	46.5786	5.5416	19.005	4.24831	19.2228	4.26475	-0.260259	0.0164414
Hus1	0.341908	1	0.136248	19.7137	16.0854	15.73	17.6822	20.1009	22.966	15.3188	15.2372	14.006	13.9865	12.6347	15.0699	17.1764	4.10236	20.2497	4.33983	14.854	3.89278	13.8971	3.79671	0.237474	-0.0960712
Npat	0.287242	1	0.136338	49.7736	40.7208	46.6129	63.6193	58.1136	55.4293	21.4442	18.7839	20.4903	20.136	19.5815	24.4512	45.7024	5.5142	59.0541	5.88397	20.2394	4.3391	21.3896	4.41884	0.369766	0.0797388
Pabpc4	-0.563995	1	0.136945	4.61385	4.49233	5.05093	4.01039	3.18431	3.10819	146.358	145.271	154.637	156.973	161.917	161.048	4.71904	2.23849	3.43429	1.78001	148.755	7.2168	159.979	7.32174	-0.458479	0.104941
Slc48a1	0.328372	1	0.136987	48.7949	50.1402	69.8472	59.0621	59.3077	62.5091	81.5377	83.3474	74.595	65.7251	68.9644	71.35	56.2608	5.81406	60.293	5.91392	79.8267	6.3188	68.6799	6.10182	0.0998604	-0.216984
Mapk8	-0.261179	1	0.137041	26.285	25.6498	23.3786	27.3436	22.2901	20.5486	12.7494	11.1107	9.83015	14.1021	11.7993	11.8379	25.1044	4.64987	23.3941	4.54807	11.2301	3.4893	12.5798	3.65303	-0.101798	0.163736
Stk25	-0.287242	1	0.13721	45.02	44.6335	53.3956	40.1039	34.6293	36.9529	21.5634	23.0535	19.7381	20.2747	20.4856	20.9121	47.683	5.5754	37.2287	5.21834	21.4517	4.42302	20.5575	4.36159	-0.35706	-0.0614275
Txnip	-0.29873	1	0.13721	161.345	208.386	215.891	183.384	251.162	321.525	46.4985	50.0221	58.5918	70.788	77.4791	95.901	195.207	7.60886	252.024	7.97742	51.7041	5.69221	81.3894	6.34677	0.368551	0.654561
Cnpy2	0.211873	1	0.137603	67.2503	74.4858	81.5365	70.5464	77.4185	79.4315	19.7963	22.658	21.8131	17.8935	19.1924	19.6915	74.4242	6.2177	75.7988	6.2441	21.4224	4.42105	18.9258	4.24228	0.0264029	-0.178768
Sf3a3	-0.268405	1	0.137856	427.969	422.714	387.767	391.195	378.734	386.797	55.4101	52.1501	52.0038	56.8015	61.0449	61.5081	412.817	8.68936	385.575	8.59087	53.188	5.73303	59.7848	5.90171	-0.0984899	0.168678
Gucd1	0.354424	1	0.13791	13.1425	10.8685	16.163	14.4009	15.7225	14.8502	24.3713	28.435	25.5739	20.2747	23.3811	25.1345	13.3913	3.74323	14.9912	3.90605	26.1267	4.70746	22.9301	4.51917	0.162819	-0.188286
Cirh1a	-0.28061	1	0.138006	349.953	348.663	295.263	314.998	344.9	267.304	70.8481	64.8091	65.8802	84.6359	75.1216	69.0546	331.293	8.37196	309.067	8.27178	67.1791	6.06994	76.2707	6.25306	-0.100187	0.183115
Ecsit	0.249047	1	0.138034	20.6924	25.3599	22.8013	23.5155	28.6588	24.6928	18.0725	20.68	19.8419	16.7607	19.0551	19.0773	22.9512	4.5205	25.6223	4.67933	19.5314	4.28773	18.2977	4.19359	0.158831	-0.0941361
Zc3h18	-0.278137	1	0.138034	110.033	108.975	105.348	88.5931	99.5096	91.6915	77.3638	68.1444	73.8947	80.3359	77.2731	71.9181	108.119	6.75647	93.2647	6.54326	73.1343	6.19248	76.509	6.25756	-0.213214	0.0650824
Tmed5	-0.172084	1	0.13824	114.927	118.395	132.479	100.989	110.058	117.766	49.9569	48.1805	50.8626	47.4617	51.1225	52.5414	121.933	6.92995	109.604	6.77616	49.6667	5.63421	50.3752	5.65464	-0.153792	0.0204357
Msantd4	-0.251359	1	0.138283	33.9747	36.8081	32.9032	32.2654	26.6686	31.9453	12.4133	12.3452	12.9945	13.293	12.2456	13.9414	34.562	5.11112	30.2931	4.92092	12.5843	3.65356	13.16	3.71809	-0.190199	0.0645294
Mthfd1	-0.133292	1	0.138283	1199.74	1181.19	1137.47	1209.68	1120.88	1191.99	162.674	162.971	178.629	183.721	176.222	192.846	1172.8	10.1957	1174.18	10.1974	168.091	7.3931	184.263	7.52562	0.00169719	0.132522
Cers5	-0.24194	1	0.138474	38.5885	44.7784	43.7266	38.8279	38.2117	33.8447	12.435	12.2088	11.3604	12.2064	13.184	11.7535	42.3645	5.40478	36.9614	5.20795	12.0014	3.58513	12.3813	3.63009	-0.196837	0.0449591
Srp72	-0.272652	1	0.138474	355.266	327.94	316.477	319.19	315.445	278.01	97.5612	100.358	96.6675	106.899	104.706	112.821	333.228	8.38036	304.215	8.24895	98.1955	6.61759	108.142	6.75678	-0.131416	0.139195
Utp3	-0.274483	1	0.138763	184.274	202.3	172.165	176.457	180.51	183.728	32.8926	34.0279	36.6491	40.1564	41.0285	39.9434	186.246	7.54107	180.232	7.49371	34.5232	5.10949	40.3761	5.33543	-0.0473564	0.225936
Gsg2	-0.286444	1	0.13879	30.1997	30.4319	34.3463	25.8852	30.4499	25.3835	16.9342	15.2099	18.8044	17.2462	17.6817	18.0333	31.6593	4.98456	27.2396	4.76763	16.9828	4.086	17.6537	4.1419	-0.216927	0.0558982
Jak1	-0.267099	1	0.139102	459.847	419.816	395.56	399.034	374.952	384.725	82.6326	73.8054	81.0274	89.3751	79.7566	90.4734	425.074	8.73157	386.237	8.59334	79.1552	6.30661	86.535	6.43521	-0.138229	0.128601
Rps26	-0.322313	1	0.139132	96.6112	109.265	123.531	73.6453	103.888	69.7615	522.346	528.301	506.94	454.713	521.628	478.937	109.803	6.77877	82.4316	6.36513	519.196	9.02014	485.093	8.92212	-0.413642	-0.0980188
Spata5	-0.284648	1	0.139595	151.418	168.68	129.16	162.785	168.37	155.064	23.9593	24.9701	24.1993	29.5682	33.4751	33.3335	149.752	7.22644	162.073	7.3405	24.3763	4.6074	32.1256	5.00565	0.114066	0.398248
Vps33b	-0.217739	1	0.139595	61.6578	56.5164	67.9711	56.3277	56.5215	59.0556	10.8739	10.9948	12.3979	11.4666	11.9137	13.2889	62.0484	5.95532	57.3016	5.8405	11.4222	3.51377	12.2231	3.61154	-0.11482	0.0977693
Rabgap1l	-0.162685	1	0.139781	196.438	167.376	161.485	196.327	168.37	160.59	47.3116	38.0042	38.9575	53.0563	42.2187	43.6975	175.1	7.45203	175.096	7.452	41.4244	5.37241	46.3242	5.53369	-3.42983e-05	0.161283
Agpat1	-0.425281	1	0.139854	9.64714	10.4338	18.472	7.47391	7.76175	10.0153	25.8566	29.3558	30.917	23.9736	25.8874	26.6392	12.851	3.68381	8.41697	3.0733	28.7098	4.84347	25.5001	4.67243	-0.610504	-0.171041
Chmp2b	0.23841	1	0.139854	69.0679	58.8351	56.1375	66.7183	65.4773	73.2151	21.8561	20.9528	20.1531	20.529	19.8791	19.3537	61.3468	5.93892	68.4702	6.0974	20.9873	4.39145	19.9206	4.31619	0.158488	-0.0752595
Nampt	-0.213393	1	0.139914	102.344	108.396	103.039	98.8014	93.9371	95.6631	31.1797	28.3122	29.5942	32.1806	30.8085	31.8288	104.593	6.70864	96.1338	6.58697	29.6954	4.89217	31.606	4.98213	-0.121666	0.0899603
Cstf2	-0.272732	1	0.140144	212.796	205.633	208.964	209.269	185.486	176.994	44.3411	42.3149	43.8336	46.5832	46.5905	50.1461	209.131	7.70826	190.583	7.57428	43.4965	5.44283	47.7733	5.57813	-0.133988	0.135304
Alkbh5	-0.250966	1	0.140308	44.7403	42.7496	49.0662	32.8123	41.396	38.3343	60.0718	60.7781	64.5574	61.2864	57.4742	62.8055	45.5187	5.50839	37.5142	5.22936	61.8024	5.94959	60.522	5.91939	-0.279023	-0.0302032
Fdx1	-0.239372	1	0.140351	77.3169	73.3264	79.5161	58.1506	59.7058	60.437	11.9038	11.6768	12.6314	12.0677	10.8036	10.3716	76.7198	6.26153	59.4311	5.89315	12.0707	3.59343	11.081	3.47001	-0.368381	-0.123419
Herc2	-0.323232	1	0.140539	88.6418	87.0933	72.8777	97.5254	66.2734	76.8413	25.5639	24.6905	25.9889	31.672	27.6499	32.5428	82.8709	6.37279	80.2133	6.32577	25.4144	4.66758	30.6215	4.93648	-0.0470238	0.268899
Ptp4a3	0.356725	1	0.140672	11.7443	11.0135	12.4109	13.4895	12.3392	14.1595	52.3528	54.9397	57.5544	50.7676	50.1039	45.8547	11.7229	3.55126	13.3294	3.73654	54.949	5.78002	48.9088	5.61202	0.185284	-0.167999
Gnb4	-0.228668	1	0.140948	67.3901	64.052	71.7232	55.5986	59.1087	57.1561	10.798	10.9811	10.8676	11.0505	10.0711	11.4387	67.7218	6.08155	57.2878	5.84016	10.8822	3.4439	10.8535	3.44008	-0.241392	-0.00382057
Polr2i	0.317012	1	0.14141	82.9095	73.6163	109.389	89.14	95.7282	110.859	19.6011	21.0892	21.7871	18.379	19.387	18.2405	88.6382	6.46986	98.5756	6.62316	20.8258	4.3803	18.6688	4.22256	0.153303	-0.157742
Cdk13	-0.29431	1	0.141616	56.0652	64.6316	49.2105	52.3173	49.9538	41.7878	43.6472	36.4901	36.9344	43.1386	38.2017	39.7515	56.6358	5.82364	48.0197	5.58555	39.0239	5.28629	40.3639	5.33499	-0.238088	0.0487091
Mark2	-0.271375	1	0.141621	115.486	112.163	110.976	95.7024	104.883	79.7768	47.0839	45.6638	43.2371	45.4504	43.3975	46.3384	112.875	6.81858	93.4541	6.54619	45.3283	5.50234	45.0621	5.49384	-0.272398	-0.00849625
Cops3	-0.156189	1	0.141688	294.308	287.654	264.524	293.852	257.531	264.714	53.4803	50.7178	51.4851	54.8596	55.7461	56.0805	282.162	8.14038	272.032	8.08763	51.8944	5.69751	55.562	5.79603	-0.0527461	0.0985208
Magt1	-0.162456	1	0.141688	179.101	184.331	198.862	183.749	162.002	176.821	45.3927	44.3133	46.0124	47.1381	44.5419	49.8007	187.431	7.55022	174.191	7.44452	45.2394	5.49951	47.1602	5.5595	-0.105696	0.0599898
Picalm	-0.264031	1	0.141688	585.679	611.247	535.832	488.356	561.831	473.135	160.267	164.976	166.179	169.988	171.347	176.625	577.586	9.17389	507.774	8.98804	163.807	7.35586	172.653	7.43173	-0.185849	0.0758768
Atxn10	-0.291976	1	0.141769	154.774	143.755	128.294	129.244	126.576	117.075	22.1922	20.7414	17.9485	19.4424	22.7287	22.6011	142.274	7.15253	124.298	6.95766	20.294	4.34298	21.5908	4.43234	-0.194864	0.0893595
Mrps30	-0.264126	1	0.142244	118.282	121.438	121.078	111.197	103.291	98.4259	41.1537	33.9255	34.7038	41.3123	38.7052	34.0475	120.266	6.91009	104.305	6.70466	36.5943	5.19355	38.0217	5.24875	-0.205426	0.055201
Hsdl2	-0.234386	1	0.142526	45.719	45.9377	41.4176	37.9164	39.4058	38.1616	11.1015	11.5882	10.4786	10.9349	11.2614	11.669	44.3581	5.47113	38.4946	5.26658	11.0561	3.46677	11.2884	3.49677	-0.204542	0.0300058
Nup133	-0.270236	1	0.142766	401.405	381.413	347.071	373.513	332.959	321.525	42.7799	38.0111	41.3437	45.0343	43.1343	45.3634	376.63	8.557	342.666	8.42066	40.7116	5.34737	44.5106	5.47608	-0.136346	0.128712
Cdkn2a	0.287448	1	0.142802	330.24	298.813	379.686	381.716	363.807	363.14	80.7137	86.3621	81.3905	74.6025	78.5206	70.8664	336.246	8.39337	369.554	8.52964	82.8221	6.37194	74.6632	6.22232	0.13627	-0.14962
Mrpl51	-0.30557	1	0.142856	25.1664	32.026	39.5416	22.604	23.6833	24.3475	22.8535	26.2115	23.8362	19.6043	23.6672	23.2843	32.2447	5.01099	23.5449	4.55734	24.3004	4.60291	22.1853	4.47153	-0.453645	-0.131378
E2f1	-0.336792	1	0.143079	13.1425	13.0423	16.8845	12.2135	9.75194	8.2885	34.2478	27.2414	29.7239	30.886	24.1593	25.6949	14.3564	3.84362	10.0846	3.33409	30.4043	4.92621	26.9134	4.75025	-0.509538	-0.175953
Csf2rb	0.286612	1	0.143526	82.0706	112.163	111.265	96.6139	127.77	131.235	177.798	226.259	189.911	166.405	200.381	201.199	101.833	6.67006	118.54	6.88923	197.989	7.62928	189.328	7.56475	0.219165	-0.0645319
Arhgef2	-0.241984	1	0.143541	97.8695	94.9186	92.5042	91.5098	85.9763	86.1659	22.6692	23.0194	24.4846	23.4419	24.9261	28.0517	95.0974	6.57133	87.884	6.45753	23.3911	4.54789	25.4732	4.67091	-0.113806	0.123023
Oaf	0.239063	1	0.143541	36.0719	38.1124	33.4805	29.8956	38.4107	31.4272	33.0444	34.3075	31.4357	26.5629	27.3294	23.5914	35.8882	5.16544	33.2445	5.05504	32.9292	5.0413	25.8279	4.69086	-0.110395	-0.350437
2310061I04Rik	-0.256362	1	0.143879	38.3089	36.8081	43.0051	32.9946	29.6539	27.283	20.8262	22.8012	23.4212	20.1822	20.1652	20.5667	39.374	5.29917	29.9771	4.90579	22.3495	4.48217	20.3047	4.34374	-0.393382	-0.138431
Ruvbl2	-0.271886	1	0.143879	449.78	409.527	453.862	406.143	356.045	348.29	107.47	109.989	105.953	104.864	113.403	111.593	437.723	8.77387	370.159	8.532	107.804	6.75227	109.954	6.78075	-0.241872	0.0284843
Vasp	0.232423	1	0.144128	39.008	38.5471	45.3141	42.2914	45.9734	44.0327	39.0396	42.4717	42.7443	34.7929	37.9728	41.1948	40.9564	5.35602	44.0992	5.46268	41.4186	5.37221	37.9868	5.24743	0.106662	-0.124778
Mis18bp1	-0.278018	1	0.144705	64.1744	57.9656	53.2512	60.885	55.7254	53.3572	16.468	14.9166	15.8735	18.0322	16.7204	20.4976	58.4637	5.86947	56.6559	5.82415	15.7527	3.97753	18.4167	4.20295	-0.0453172	0.225419
Ube3b	-0.304007	1	0.144877	28.522	30.8667	30.5942	25.7029	27.4646	18.3038	39.2239	41.1826	39.0612	40.1101	36.9657	39.2985	29.9943	4.90662	23.8238	4.57433	39.8226	5.31552	38.7915	5.27767	-0.332285	-0.0378487
Mrps34	0.341948	1	0.14498	60.2597	45.2131	69.7028	74.3745	63.6861	65.0993	29.651	26.7298	25.0552	26.586	24.8917	23.2383	58.3919	5.8677	67.72	6.08151	27.1454	4.76263	24.9053	4.63838	0.213813	-0.124251
Ung	-0.236494	1	0.14498	42.6431	40.5759	46.6129	34.6352	33.8333	33.4994	18.8422	17.9995	19.8678	18.3328	17.1553	16.9585	43.2773	5.43554	33.9893	5.08701	18.9032	4.24056	17.4822	4.12781	-0.348532	-0.112744
Zcchc17	0.297633	1	0.14551	42.0839	47.8216	55.4159	43.2028	47.9636	62.8545	26.6914	31.8112	29.5164	20.0435	27.4668	29.2494	48.4405	5.59814	51.3403	5.68202	29.3396	4.87478	25.5865	4.67731	0.0838789	-0.197466
Tmem60	0.271742	1	0.145886	20.5526	19.2736	17.8947	17.1353	23.0862	22.1027	16.5872	17.4061	17.6631	15.3505	15.7934	14.9241	19.2403	4.26606	20.7747	4.37676	17.2188	4.10592	15.356	3.94073	0.110699	-0.165186
Atp2b4	-0.2682	1	0.145888	432.024	447.059	398.302	406.872	374.952	354.506	82.676	81.5127	84.3992	90.531	83.6592	91.8476	425.795	8.73402	378.777	8.5652	82.8626	6.37265	88.6793	6.47052	-0.168812	0.0978748
Mms19	-0.257605	1	0.145936	84.1678	81.2967	69.1256	75.4682	73.8361	66.308	14.3864	13.8458	12.1126	14.6338	14.1912	15.3233	78.1967	6.28904	71.8708	6.16733	13.4483	3.74935	14.7161	3.87932	-0.121702	0.129974
Trmt6	-0.219839	1	0.146162	88.2224	92.1653	84.567	88.5931	85.5783	76.6686	42.3029	37.9224	38.3869	46.4445	41.7151	42.3233	88.3182	6.46464	83.6133	6.38566	39.5374	5.30515	43.4943	5.44275	-0.078978	0.13761
Fam65a	-0.16213	1	0.146365	189.867	174.476	184.864	162.421	150.259	160.935	53.2418	52.4093	58.8771	50.4671	49.8178	58.0534	183.069	7.51624	157.872	7.30261	54.8427	5.77723	52.7795	5.7219	-0.213635	-0.0553242
Tarsl2	-0.253014	1	0.146525	116.605	105.352	104.915	98.6191	97.1214	94.627	25.7807	27.4596	28.7901	26.9096	27.9245	31.7444	108.957	6.76762	96.7892	6.59677	27.3435	4.77313	28.8595	4.85098	-0.170846	0.0778495
Tubgcp4	-0.235943	1	0.146546	35.5126	35.5039	39.2529	34.2706	32.6391	30.5638	19.3951	19.6705	21.9168	20.0897	19.9706	23.2076	36.7565	5.19993	32.4912	5.02198	20.3275	4.34536	21.0893	4.39844	-0.177951	0.0530789
Man2b2	-0.346872	1	0.146567	59.7004	61.8782	75.9083	58.1506	51.745	40.7518	14.3864	14.8757	14.1876	14.5414	13.5503	14.0105	65.829	6.04065	50.2158	5.65007	14.4832	3.85631	14.0341	3.81086	-0.390581	-0.0454522
C2cd4a	0.272359	1	0.146917	28.3822	23.3311	28.8625	31.7185	26.2705	24.0021	44.4928	37.5132	33.6144	37.2435	31.335	28.6813	26.8586	4.74731	27.3304	4.77243	38.5401	5.26829	32.4199	5.01881	0.0251227	-0.249482
Mcm10	0.254606	1	0.147093	103.742	89.9915	87.8862	109.374	111.252	117.938	27.396	25.1816	26.1186	24.829	25.6471	28.6582	93.8731	6.55264	112.855	6.81832	26.2321	4.71326	26.3781	4.72127	0.265683	0.00800834
Tomm7	0.323618	1	0.147167	152.816	146.943	193.667	215.467	191.456	208.594	34.2911	42.1102	46.7127	40.4338	43.1228	39.0222	164.475	7.36173	205.173	7.68069	41.038	5.35889	40.8596	5.3526	0.318966	-0.00628602
Prkd3	-0.31932	1	0.147215	18.036	17.5346	14.5755	18.0467	15.1255	11.9147	19.3301	16.5672	18.5709	23.0489	19.0322	18.6321	16.7154	4.0631	15.029	3.90967	18.1561	4.18238	20.2377	4.33897	-0.153428	0.156594
Por	-0.171348	1	0.147368	124.574	130.712	135.076	123.593	131.154	122.428	25.5422	25.3521	27.182	28.2736	28.2564	28.213	130.121	7.02371	125.725	6.97413	26.0254	4.70185	28.2477	4.82006	-0.0495824	0.118209
Srfbp1	-0.247828	1	0.147621	62.7763	59.9944	64.219	61.9787	67.4675	64.5812	13.1939	12.4134	11.1789	14.2408	15.7591	15.4001	62.3299	5.96185	64.6758	6.01515	12.2621	3.61613	15.1333	3.91966	0.0533025	0.303525
Cdk9	-0.246115	1	0.147674	133.382	129.988	119.924	117.942	107.072	96.3538	28.9572	27.8279	30.1907	30.0768	28.1305	27.998	127.764	6.99734	107.123	6.74312	28.992	4.85758	28.7351	4.84474	-0.254223	-0.012838
Rad1	-0.25697	1	0.147746	28.2423	27.9684	33.9134	23.6977	22.6882	28.1464	10.1909	10.8993	10.4267	9.98708	10.4145	11.1854	30.0414	4.90888	24.8441	4.63483	10.5056	3.39309	10.529	3.39629	-0.274048	0.00320553
Vps25	0.252006	1	0.147746	85.4261	92.1653	110.976	96.4316	117.421	116.384	32.7191	36.2786	34.4704	31.9725	33.7154	34.0398	96.1892	6.5878	110.079	6.7824	34.4894	5.10808	33.2426	5.05496	0.194594	-0.0531196
Prkcq	-0.151571	1	0.148172	313.742	299.102	268.998	286.743	269.472	272.312	82.0038	76.5064	76.8515	83.0638	79.6536	82.6198	293.947	8.19941	276.175	8.10944	78.4539	6.29377	81.7791	6.35366	-0.0899726	0.0598863
Naa16	-0.274432	1	0.148434	63.4754	78.1086	62.1986	59.609	68.0646	63.7178	20.4576	19.7592	19.0897	21.7543	21.8017	23.8448	67.9275	6.08592	63.7971	5.99542	19.7688	4.30516	22.4669	4.48973	-0.090505	0.184575
Chordc1	-0.268924	1	0.148551	197.417	293.161	305.365	197.785	251.162	294.76	34.8007	41.6942	47.6723	38.3994	47.2886	55.0287	265.314	8.05156	247.902	7.95363	41.3891	5.37118	46.9056	5.55169	-0.0979298	0.18051
Trappc10	-0.283508	1	0.148728	45.02	42.6047	46.4686	41.0153	35.8235	27.1103	34.5622	31.3883	33.4329	34.6542	28.863	29.8328	44.6977	5.48213	34.6497	5.11477	33.1278	5.04997	31.1167	4.95962	-0.367359	-0.0903536
Pola1	-0.282672	1	0.148763	391.758	359.966	293.243	404.867	322.212	346.045	30.1497	25.5362	26.7671	36.1107	32.0331	34.4544	348.322	8.44428	357.708	8.48264	27.4843	4.78054	34.1994	5.0959	0.03836	0.31536
Rab22a	-0.277206	1	0.148904	31.8775	29.5624	27.4193	21.328	22.6882	24.1748	17.2052	15.9397	12.787	14.9806	14.6833	13.3273	29.6198	4.88849	22.7303	4.50655	15.3106	3.93646	14.3304	3.84101	-0.381942	-0.0954553
Arglu1	-0.299033	1	0.148919	58.5819	92.0203	76.1969	53.7757	66.2734	64.9266	41.4898	47.8941	49.6435	45.8897	47.0597	46.822	75.5997	6.24031	61.6585	5.94623	46.3425	5.53426	46.5905	5.54196	-0.29408	0.00769988
Morf4l1	-0.324814	1	0.149189	17.0573	17.5346	15.8744	17.4999	13.3343	11.742	44.2218	47.328	45.9086	50.9064	48.3186	46.0082	16.8221	4.07228	14.1921	3.82701	45.8195	5.51789	48.4111	5.59726	-0.24527	0.0793763
Nfkb1	-0.266108	1	0.149291	264.108	232.732	272.173	237.16	212.951	202.032	83.9011	78.8595	80.9237	86.7396	79.1386	82.712	256.338	8.0019	217.381	7.76408	81.2281	6.34391	82.8634	6.37266	-0.23782	0.0287564
Scd1	-0.269759	1	0.149664	172.67	168.1	156.579	143.098	140.906	125.364	159.097	140.136	139.956	157.25	133.282	144.765	165.783	7.37315	136.456	7.09229	146.396	7.19373	145.099	7.1809	-0.280863	-0.0128377
Rfc2	0.15625	1	0.149927	222.863	192.736	216.757	223.123	212.552	222.753	71.9648	67.892	65.2058	64.4536	63.2651	64.1567	210.785	7.71963	219.476	7.77792	68.3542	6.09496	63.9585	5.99906	0.0582929	-0.0958945
BC003965	0.354389	1	0.149955	19.4341	15.3609	25.8319	24.2446	22.0911	25.9016	30.2148	31.6816	32.2916	30.0075	29.8472	28.3204	20.209	4.33692	24.0791	4.58971	31.396	4.97251	29.3917	4.87734	0.252787	-0.095172
Nudt5	-0.161738	1	0.150069	203.569	205.053	219.788	185.754	189.864	183.728	28.1441	28.9261	28.5567	29.5682	27.3523	28.6659	209.47	7.7106	186.449	7.54264	28.5423	4.83503	28.5288	4.83435	-0.167962	-0.000681444
Wdr43	-0.277849	1	0.150601	643.003	651.388	435.679	597.73	603.227	486.431	137.165	120.097	110.258	151.494	149.396	135.499	576.69	9.17165	562.463	9.13561	122.507	6.93672	145.463	7.18451	-0.0360378	0.247793
Sec63	-0.238158	1	0.150955	57.4634	59.1249	52.9626	62.8902	57.1185	49.0403	22.3982	22.5284	21.1906	26.1236	25.1321	26.1632	56.517	5.82061	56.3497	5.81633	22.039	4.46199	25.8063	4.68965	-0.00427699	0.227661
Kif2a	-0.281447	1	0.151226	173.369	180.418	165.959	162.785	157.424	140.041	38.5084	35.9172	39.2428	38.9542	38.5565	44.4959	173.249	7.4367	153.417	7.26131	37.8894	5.24372	40.6689	5.34585	-0.175387	0.102128
Wdr59	0.234976	1	0.151873	30.3395	29.2726	34.202	32.63	34.6293	35.5715	14.0178	12.1952	13.9541	12.3451	11.8794	13.0739	31.2714	4.96677	34.2769	5.09917	13.3891	3.74298	12.4328	3.63608	0.132394	-0.106902
Tmem158	-0.582244	1	0.152114	4.05459	4.49233	5.62818	1.8229	3.18431	2.93551	14.4949	16.5058	14.1616	13.5473	14.111	10.5252	4.72504	2.24033	2.64757	1.40467	15.0541	3.91208	12.7278	3.66991	-0.835654	-0.24217
Gabpa	-0.267274	1	0.152155	173.788	172.737	154.414	148.202	154.837	146.43	32.2421	30.1401	28.2195	33.7295	30.5911	33.5178	166.98	7.38353	149.823	7.22712	30.2006	4.9165	32.6128	5.02737	-0.156415	0.110861
Rrp7a	0.282423	1	0.152199	34.9534	32.026	39.1086	33.5414	43.9832	41.7878	51.8866	57.1769	52.2113	50.2822	50.9279	47.6588	35.3627	5.14416	39.7708	5.31364	53.7583	5.74841	49.623	5.63294	0.169484	-0.115479
Synrg	-0.231126	1	0.152229	59.281	54.4876	57.0034	54.8694	47.1675	45.7594	14.8093	14.5278	13.3057	14.8188	13.7906	14.7629	56.924	5.83096	49.2655	5.6225	14.2143	3.82927	14.4574	3.85374	-0.20846	0.0244701
Baz1a	-0.281908	1	0.152771	376.658	372.574	300.891	358.565	339.527	317.553	58.2071	52.0137	53.7416	63.7601	60.7359	67.8647	350.041	8.45138	338.548	8.40322	54.6541	5.77226	64.1202	6.00271	-0.0481616	0.230448
Lgals8	-0.239319	1	0.153235	28.9414	28.8379	31.0271	26.2498	28.2607	27.1103	10.9064	9.93076	10.1933	11.3742	10.7464	11.5769	29.6021	4.88763	27.2069	4.7659	10.3435	3.37065	11.2325	3.48961	-0.121727	0.118957
Tpp2	-0.28282	1	0.15324	314.161	328.955	271.596	333.409	295.145	275.075	41.1645	35.2828	38.6981	46.3289	43.8667	47.4669	304.904	8.25221	301.21	8.23462	38.3818	5.26235	45.8875	5.52003	-0.017586	0.257678
Cgnl1	-0.409944	1	0.153901	39.8469	56.6613	51.9524	48.8538	32.0421	41.2698	17.2052	17.6039	19.375	17.8935	18.7117	22.9696	49.4869	5.62897	40.7219	5.34773	18.0614	4.17483	19.8583	4.31167	-0.281241	0.136833
Cpeb4	0.255152	1	0.153901	22.51	26.0845	23.2343	27.1613	28.8578	29.3551	33.207	35.9172	35.845	32.851	33.9443	37.8322	23.9429	4.58153	28.4581	4.83076	34.9897	5.12886	34.8759	5.12416	0.249237	-0.00470259
Lamp1	-0.264074	1	0.153928	450.619	404.745	432.071	384.45	354.652	295.623	185.192	179.374	172.974	184.576	171.736	161.04	429.145	8.74532	344.909	8.43007	179.18	7.48527	172.451	7.43004	-0.315251	-0.055226
Ppp4r2	-0.361686	1	0.153928	10.0666	11.5931	10.1019	10.026	7.56273	8.63385	18.1376	16.458	18.8562	20.529	17.9678	18.2252	10.5872	3.40425	8.74085	3.12777	17.8173	4.15521	18.9073	4.24087	-0.276473	0.085669
Zfp146	-0.266976	1	0.153928	20.972	23.9108	24.5331	18.7759	17.9117	23.1387	24.8158	24.67	26.5077	27.2333	25.567	26.4856	23.1386	4.53223	19.9421	4.31775	25.3312	4.66284	26.4286	4.72403	-0.214485	0.0611878
Spint2	0.265704	1	0.154356	42.0839	40.7208	49.9321	53.958	45.7744	43.3419	17.1076	16.9218	16.0291	14.865	14.7634	15.3003	44.2456	5.46746	47.6914	5.57566	16.6862	4.06058	14.9762	3.9046	0.108197	-0.155981
Bcas3	-0.166665	1	0.15452	164.7	149.986	141.57	145.285	141.901	135.033	22.8969	20.1616	20.5162	24.043	21.6644	20.321	152.086	7.24874	140.74	7.13689	21.1916	4.40542	22.0095	4.46005	-0.111852	0.0546326
Abcf1	-0.26848	1	0.1547	331.358	328.955	276.647	293.305	278.428	254.526	107.427	101.538	106.394	110.297	111.481	112.967	312.32	8.28688	275.42	8.10549	105.12	6.71589	111.582	6.80196	-0.181392	0.0860687
Ssbp3	-0.28212	1	0.155134	68.0892	73.6163	79.3718	57.6038	60.1038	50.4217	94.8833	89.3836	97.6271	92.6348	81.3359	86.4814	73.6924	6.20344	56.0431	5.80846	93.9647	6.55405	86.8174	6.43991	-0.39498	-0.114135
Fundc2	0.283842	1	0.15536	152.956	191.721	165.093	166.613	177.326	209.457	45.3601	52.6685	46.9461	36.5499	46.7393	46.8374	169.923	7.40874	184.466	7.52721	48.3249	5.59469	43.3755	5.43881	0.118466	-0.155886
Dcaf6	-0.258462	1	0.155478	131.984	136.944	134.066	116.484	124.188	118.456	37.446	36.9539	42.5627	42.9768	40.4105	41.0105	134.331	7.06965	119.709	6.90339	38.9875	5.28494	41.4659	5.37385	-0.16626	0.0889138
Hdgfrp2	-0.214996	1	0.156237	117.304	93.4695	100.153	102.447	93.9371	91.3462	26.5613	25.0929	25.8074	29.5682	27.0891	26.6008	103.642	6.69546	95.9101	6.58361	25.8205	4.69045	27.7527	4.79456	-0.111853	0.10411
Psma6	-0.135836	1	0.156646	700.047	759.204	735.271	690.881	685.024	652.892	88.6713	93.019	87.5895	88.1961	94.1995	91.2104	731.507	9.51473	676.266	9.40145	89.7599	6.488	91.202	6.51099	-0.113282	0.0229941
Amotl1	-0.247486	1	0.156876	58.3023	61.4435	63.2088	55.5986	47.7646	54.7386	17.4654	18.702	21.7871	18.7258	17.9907	22.6395	60.9849	5.93038	52.7006	5.71975	19.3182	4.27189	19.7853	4.30636	-0.210632	0.0344711
Nup93	-0.262593	1	0.156913	365.613	346.489	367.852	367.68	323.804	325.669	34.6164	33.6732	38.5425	40.7343	38.6595	41.0566	359.985	8.49179	339.051	8.40536	35.6107	5.15424	40.1501	5.32733	-0.086433	0.173094
Matr3	-0.262292	1	0.157109	398.329	398.223	337.402	410.153	367.19	348.635	89.2133	74.3443	75.9178	97.5589	93.8562	92.6921	377.985	8.56218	375.326	8.552	79.8251	6.31877	94.7024	6.56533	-0.0101832	0.246558
Smc6	-0.28107	1	0.157305	135.479	147.088	127.572	128.332	113.043	145.567	44.7422	41.2577	45.0268	50.0972	47.2314	52.4032	136.713	7.09501	128.981	7.01101	43.6755	5.44875	49.9106	5.64127	-0.0839955	0.192521
Gsk3b	-0.346931	1	0.157321	83.6085	82.7459	88.1748	61.2496	77.2194	57.3288	33.2504	27.5619	30.4242	34.5155	25.8187	29.0498	84.8431	6.40672	65.2659	6.02826	30.4122	4.92658	29.7947	4.89698	-0.378467	-0.0295939
Prep	-0.266242	1	0.15745	652.091	590.814	498.166	559.085	538.347	515.096	64.3325	62.4219	65.5948	73.7472	69.6511	71.3116	580.357	9.1808	537.509	9.07015	64.1164	6.00262	71.57	6.16128	-0.110651	0.158661
Pitrm1	-0.263877	1	0.157672	598.682	678.632	600.916	615.23	559.244	533.399	136.796	126.522	137.129	145.298	139.485	151.759	626.077	9.2902	569.291	9.15302	133.482	7.0605	145.514	7.18502	-0.137173	0.124511
Mettl3	-0.212906	1	0.157924	79.4141	86.2238	97.6994	75.4682	75.0302	86.5112	16.327	18.0745	17.8706	16.4602	18.5858	19.8604	87.7791	6.45581	79.0032	6.30384	17.4241	4.12301	18.3021	4.19394	-0.151966	0.0709304
Rps7	0.415449	1	0.157932	107.517	90.1365	61.3327	84.9473	125.581	106.369	480.607	427.657	427.106	419.596	438.438	383.643	86.3286	6.43177	105.633	6.72291	445.123	8.79806	413.892	8.69311	0.291143	-0.10495
Snd1	-0.267221	1	0.158062	147.643	148.102	134.788	133.437	130.756	113.967	32.5023	31.6134	34.2888	34.7698	32.7198	36.2124	143.511	7.16502	126.053	6.97789	32.8015	5.03569	34.5673	5.11134	-0.18713	0.0756476
Acd	0.382035	1	0.158293	27.6831	19.5634	29.7283	36.6404	31.6441	23.8294	22.9728	22.8762	19.4787	21.5	19.49	18.6628	25.6583	4.68135	30.7046	4.94038	21.7759	4.44466	19.8842	4.31355	0.259032	-0.131108
Impdh2	-0.42663	1	0.15837	6.85087	8.26009	8.51443	6.92703	6.56763	4.83496	80.2042	90.7887	96.7971	90.138	94.2682	93.1757	7.87513	2.9773	6.10988	2.61114	89.2633	6.48	92.5273	6.53181	-0.366161	0.0518114
Pja2	-0.201417	1	0.15837	78.8549	73.9061	73.3107	77.2911	72.0449	70.7976	12.435	11.2949	11.5679	13.7553	12.4974	13.1891	75.3572	6.23567	73.3779	6.19727	11.7659	3.55654	13.1473	3.71669	-0.0384001	0.160147
Ube3a	-0.291985	1	0.158521	164.141	188.678	143.013	150.572	153.046	150.574	24.8158	22.2351	24.1733	28.5279	24.8231	26.5624	165.278	7.36875	151.397	7.2422	23.7414	4.56933	26.6378	4.7354	-0.126551	0.166069
Eif3m	-0.269161	1	0.15919	248.868	325.042	305.365	248.644	286.588	279.564	68.7991	70.6339	68.6814	76.7294	81.5534	74.9812	293.092	8.19521	271.599	8.08533	69.3714	6.11627	77.7547	6.28086	-0.109876	0.164587
Wdr7	-0.160649	1	0.159276	167.077	152.594	165.382	156.041	144.289	161.453	29.6727	28.1281	31.4098	31.2327	29.1033	34.5081	161.684	7.33704	153.928	7.26611	29.7369	4.89418	31.6147	4.98252	-0.0709303	0.0883441
Rpl5	-1.37202	1	0.159386	0.279627	0.869484	1.1545	0.729162	0.199019	0.172677	87.8365	120.199	146.493	139.38	154.558	141.94	0.76787	-0.381067	0.366953	-1.44633	118.176	6.88479	145.293	7.18282	-1.06527	0.298023
Mvd	-0.263218	1	0.15942	190.146	182.447	235.806	155.494	156.628	185.282	61.0584	67.2918	73.8169	61.4945	66.8701	70.091	202.8	7.66391	165.801	7.37331	67.389	6.07444	66.1519	6.04771	-0.2906	-0.0267319
Cnbp	-0.237058	1	0.159457	1326.97	1265.53	1363.9	1173.22	1161.48	1061.45	273.592	278.027	262.95	269.166	280.024	274.076	1318.8	10.365	1132.05	10.1447	271.523	8.08493	274.422	8.10025	-0.220291	0.0153211
Zcchc6	-0.240233	1	0.159596	95.9121	101.295	94.9575	92.7858	76.0253	93.4183	38.0639	37.1244	41.9143	40.087	39.2088	44.4882	97.3881	6.60567	87.4098	6.44972	39.0342	5.28667	41.2613	5.36672	-0.155951	0.0800516
Haus1	-0.213136	1	0.160809	84.4474	92.8898	81.3921	78.2026	75.4283	76.1506	13.7902	13.1432	13.202	13.8709	13.6533	13.7418	86.2431	6.43034	76.5938	6.25916	13.3785	3.74184	13.7553	3.78192	-0.171182	0.0400797
Myh10	-0.291954	1	0.160883	218.389	233.311	225.416	244.998	184.69	182.865	43.6906	34.7713	40.2284	47.1843	38.9913	43.8049	225.705	7.8183	204.184	7.67373	39.5634	5.3061	43.3269	5.43719	-0.144568	0.131095
Ankrd52	-0.308099	1	0.161164	280.606	248.527	247.496	254.113	217.727	165.252	45.23	39.9618	39.6059	42.5607	38.236	44.5189	258.876	8.01612	212.364	7.73039	41.5992	5.37848	41.7719	5.38446	-0.285724	0.00597455
Smim10l1	-0.627004	1	0.161164	3.63515	2.31862	3.17487	2.18748	2.18921	1.72677	15.4272	15.5509	15.4585	15.9978	15.7591	15.8991	3.04288	1.60544	2.03449	1.02467	15.4789	3.95223	15.8853	3.98962	-0.580772	0.0373927
Zfp628	-0.455388	1	0.161276	4.75366	6.08638	6.20543	4.92184	3.98038	4.31693	11.8171	10.7629	10.5823	12.3914	11.1927	11.9684	5.68183	2.50635	4.40638	2.1396	11.0541	3.46651	11.8508	3.56692	-0.366759	0.10041
Rapgef6	-0.242704	1	0.161469	113.109	104.048	101.163	106.822	94.9322	84.2664	37.9447	32.3022	33.4069	38.4225	33.0402	38.1854	106.107	6.72937	95.3402	6.57501	34.5513	5.11067	36.5494	5.19177	-0.15436	0.0811071
Sowaha	0.355806	1	0.161533	8.10919	9.99906	10.5348	10.7551	12.1402	8.97921	31.0279	28.6805	31.8767	27.9962	25.8073	25.3878	9.54768	3.25515	10.6248	3.40937	30.5284	4.93208	26.3971	4.72231	0.154218	-0.20977
Gga3	-0.239842	1	0.161534	26.285	28.9828	27.4193	20.9634	22.8872	24.6928	16.3487	17.5698	18.1819	15.9516	16.6059	18.5016	27.5624	4.78463	22.8478	4.51398	17.3668	4.11826	17.0197	4.08913	-0.270644	-0.0291272
Vangl1	0.353849	1	0.161775	12.3036	14.9261	14.8642	9.66139	17.7127	17.4404	16.0343	16.6081	14.9398	12.6688	14.1912	12.9434	14.0313	3.81058	14.9382	3.90093	15.8607	3.98739	13.2678	3.72986	0.0903539	-0.257531
St3gal2	-0.278231	1	0.161811	25.8655	27.2438	32.6146	20.9634	24.0813	19.1672	77.9275	83.9408	88.4454	73.7009	72.7182	80.3398	28.5746	4.83666	21.404	4.41981	83.4379	6.38263	75.5863	6.24005	-0.416858	-0.142578
Ctu2	-0.288516	1	0.161861	22.9294	24.7803	28.7181	21.8748	22.0911	20.8939	13.4649	15.7078	13.7466	14.9113	14.4315	15.4615	25.476	4.67106	21.62	4.43429	14.3065	3.83859	14.9347	3.9006	-0.236772	0.0620059
Ssbp4	-0.413787	1	0.161861	15.6591	14.2016	20.781	10.5728	13.1353	10.3606	78.2853	66.221	65.2058	71.9671	61.7888	53.7006	16.8806	4.07729	11.3562	3.50541	69.904	6.1273	62.4855	5.96545	-0.571876	-0.161854
Wdr83os	0.295892	1	0.161861	15.0999	18.8388	20.781	16.7707	22.0911	19.5125	26.171	30.1742	24.8218	21.4075	25.6127	23.7296	18.2399	4.18902	19.4581	4.2823	27.0557	4.75786	23.5833	4.55969	0.0932757	-0.198166
Bccip	0.268277	1	0.162023	173.089	153.464	153.115	190.676	182.899	217.228	61.8281	59.8437	63.3383	65.5864	63.082	60.5638	159.889	7.32093	196.934	7.62157	61.6701	5.9465	63.0774	5.97905	0.300638	0.0325533
Rbm33	-0.280626	1	0.162616	59.8402	57.241	48.9219	52.135	54.1332	40.5791	39.4299	34.1233	33.0179	41.3354	34.0817	38.4464	55.3344	5.7901	48.9491	5.61321	35.5237	5.15071	37.9545	5.2462	-0.176893	0.0954879
Gga2	-0.246487	1	0.162722	119.401	110.135	117.037	104.999	103.888	84.2664	33.4997	31.1905	31.8767	33.822	30.1905	32.6119	115.524	6.85205	97.7179	6.61055	32.189	5.00849	32.2081	5.00935	-0.241501	0.000859277
Nol8	-0.255969	1	0.162792	112.83	119.264	107.224	114.114	111.65	101.016	26.9732	27.9575	29.9054	31.4639	30.8887	34.915	113.106	6.82153	108.927	6.76721	28.2787	4.82165	32.4225	5.01892	-0.0543189	0.197278
Ubac2	-0.239151	1	0.162874	40.9654	46.8072	49.2105	35.3643	42.9881	32.2906	21.2165	23.5719	24.0955	20.5521	22.1451	22.6395	45.661	5.51289	36.881	5.20481	22.9613	4.52113	21.7789	4.44486	-0.308084	-0.0762752
Ppp1r9b	-0.30282	1	0.16303	78.8549	102.599	109.533	84.4004	71.6469	73.7331	110.517	106.81	111.244	107.315	103.801	109.996	96.9957	6.59985	76.5935	6.25915	109.524	6.7751	107.037	6.74197	-0.340698	-0.0331266
Yaf2	0.324721	1	0.16309	12.024	11.738	16.7402	14.5832	16.9166	13.4688	22.2789	19.1795	20.6978	19.3037	17.9449	17.6494	13.5007	3.75497	14.9896	3.90589	20.7187	4.37286	18.2994	4.19372	0.150919	-0.179142
Noc2l	-0.141188	1	0.163175	383.788	379.095	381.562	340.154	365.598	332.921	160.354	155.693	145.559	152.904	156.664	151.966	381.482	8.57547	346.224	8.43556	153.869	7.26556	153.845	7.26533	-0.139906	-0.000226933
Babam1	-0.221964	1	0.163328	61.2383	63.0376	67.5382	53.0465	48.5607	44.378	36.9689	37.9906	38.8797	32.5505	34.322	34.0014	63.938	5.9986	48.6617	5.60472	37.9464	5.24589	33.6246	5.07145	-0.393887	-0.174445
Slc30a9	0.336364	1	0.16337	17.1971	27.2438	28.5738	28.255	29.0568	24.3475	25.3687	29.0284	28.5308	21.7543	24.6171	27.998	24.3382	4.60515	27.2198	4.76658	27.6426	4.78882	24.7898	4.63167	0.161429	-0.157149
4930430F08Rik	-0.212824	1	0.163408	55.0866	55.7919	63.786	46.8486	45.1774	59.2282	10.9064	11.2403	13.4095	10.6806	11.7535	13.12	58.2215	5.86348	50.4181	5.65587	11.8521	3.56706	11.8514	3.56698	-0.207611	-8.35758e-05
Psmc3	-0.141813	1	0.163512	414.827	435.321	470.458	420.908	416.149	412.526	97.5286	98.9802	101.621	106.39	105.335	99.7626	440.202	8.78202	416.528	8.70227	99.3768	6.63484	103.829	6.69807	-0.0797537	0.0632324
Dbf4	-0.235941	1	0.164121	63.3356	56.9512	54.5501	53.4111	56.9195	50.4217	48.992	41.4623	45.5455	54.8365	46.2014	46.2693	58.2789	5.8649	53.5841	5.74373	45.3333	5.5025	49.1024	5.61772	-0.12117	0.115223
Gpd2	-0.280472	1	0.164214	82.0706	94.9186	78.6502	83.8536	71.8459	65.79	16.5005	14.33	15.7179	18.4021	15.2898	15.116	85.2131	6.413	73.8298	6.20613	15.5161	3.9557	16.2693	4.02408	-0.206872	0.0683845
Msi2	-0.258938	1	0.164546	49.3542	49.2707	45.8913	41.7445	41.595	36.4349	18.4953	17.488	20.4384	19.6043	16.8005	19.2539	48.1721	5.59013	39.9248	5.31921	18.8072	4.23322	18.5529	4.21357	-0.270912	-0.0196432
Txnl1	-0.258071	1	0.164563	551.565	637.331	566.859	472.132	530.983	507.153	120.675	120.028	132.72	132.56	128.35	123.124	585.252	9.19291	503.423	8.97563	124.474	6.95971	128.011	7.00013	-0.217287	0.04042
Zfp62	-0.320456	1	0.164706	14.261	15.216	15.5857	15.4947	16.7176	13.8142	12.7494	11.4381	12.6054	14.657	14.3972	17.6648	15.0209	3.9089	15.3422	3.93943	12.2643	3.61639	15.573	3.96097	0.0305305	0.344577
Polr2m	0.189809	1	0.165155	48.9348	48.4013	46.3243	52.4996	54.3322	49.213	137.674	136.282	140.294	135.612	130.73	127.576	47.8868	5.58155	52.0149	5.70085	138.083	7.10939	131.306	7.03679	0.1193	-0.0726042
Pawr	0.287208	1	0.165265	20.273	22.0269	17.7504	20.4165	23.4843	24.8655	18.4845	16.1238	16.0032	15.9978	15.4157	16.0987	20.0168	4.32314	22.9221	4.51867	16.8705	4.07643	15.8374	3.98526	0.19553	-0.0911669
Ptpn2	-0.175717	1	0.165265	116.884	124.336	105.348	115.754	116.227	110.859	25.3037	25.0111	24.9774	28.5741	28.1534	27.2533	115.523	6.85203	114.28	6.83643	25.0974	4.64946	27.9936	4.80703	-0.015603	0.157562
Esyt1	-0.149178	1	0.165571	263.269	258.961	260.772	250.832	239.619	243.129	56.3858	59.871	59.5515	59.0209	60.3582	63.1663	261.001	8.02791	244.527	7.93385	58.6028	5.8729	60.8485	5.92715	-0.0940626	0.054252
Timm21	-0.272846	1	0.165677	22.6498	19.5634	23.09	15.1301	17.3147	19.3398	14.7659	16.2807	15.4326	13.8478	14.9579	15.9298	21.7677	4.44412	17.2615	4.10949	15.4931	3.95355	14.9118	3.89839	-0.334629	-0.0551631
Ap2b1	-0.261337	1	0.166027	271.378	277.075	254.567	239.712	244.197	231.215	52.2227	49.8175	53.1191	54.3741	51.8435	59.228	267.673	8.06433	238.374	7.89709	51.7198	5.69264	55.1485	5.78525	-0.167245	0.0926069
Ipo7	-0.285729	1	0.166123	733.881	850.065	615.059	759.786	747.715	626.3	76.529	67.4691	74.3875	90.0686	82.4117	85.9133	733.002	9.51767	711.267	9.47425	72.7952	6.18577	86.1312	6.42846	-0.0434256	0.242693
Clpx	-0.266325	1	0.166199	89.7603	98.6864	79.2275	94.791	81.7969	70.4522	25.2278	23.5242	25.0811	28.1349	26.803	26.5854	89.2247	6.47937	82.3467	6.36364	24.611	4.62123	27.1744	4.76418	-0.115732	0.142945
Nae1	-0.227305	1	0.166199	123.176	129.843	116.893	115.937	118.217	115.521	13.7577	14.2277	15.5622	15.5123	15.5073	16.8817	123.304	6.94607	116.558	6.86491	14.5159	3.85956	15.9671	3.99703	-0.0811658	0.137472
Terf2	-0.266446	1	0.166793	44.0413	42.3149	35.5008	38.0987	30.2509	39.025	18.6471	18.4565	18.9341	19.1419	19.4785	20.7279	40.619	5.34408	35.7915	5.16155	18.6792	4.22336	19.7828	4.30617	-0.182536	0.0828107
Abl2	-0.357072	1	0.166922	15.9387	15.9405	19.1935	12.578	17.3147	12.2601	15.1345	14.5483	13.7985	14.9575	13.9852	16.9892	17.0243	4.08952	14.0509	3.81259	14.4938	3.85736	15.3106	3.93646	-0.276928	0.0790994
Txndc15	-0.254479	1	0.166981	88.7816	94.4839	115.45	87.1348	77.8165	81.8489	15.9259	17.9586	18.3894	16.2521	17.6131	17.9181	99.5718	6.63767	82.2667	6.36224	17.4246	4.12306	17.2611	4.10945	-0.275428	-0.0136036
Pus7	-0.158094	1	0.167543	144.288	137.523	146.766	126.51	142.1	137.451	49.2522	50.6018	53.171	53.2875	52.1182	56.1649	142.859	7.15845	135.353	7.08059	51.0083	5.67266	53.8569	5.75106	-0.0778594	0.0783972
Med13l	-0.218378	1	0.167727	74.8003	76.0798	77.7843	75.2859	71.4479	61.9911	48.9595	46.8369	46.7127	51.3687	48.7306	50.8524	76.2215	6.25213	69.575	6.1205	47.503	5.56995	50.3172	5.65298	-0.131629	0.0830343
Vps13c	-0.286281	1	0.167995	612.943	523.719	424.567	596.272	426.1	457.767	59.2479	47.0142	53.5082	69.1004	51.7519	63.1203	520.409	9.0235	493.38	8.94655	53.2568	5.73489	61.3242	5.93838	-0.0769492	0.203492
Med16	-0.208275	1	0.168046	50.7523	44.3437	48.056	45.3903	39.2068	37.1256	22.5608	19.5819	18.7006	22.1704	19.1581	18.5169	47.7173	5.57644	40.5742	5.34249	20.2811	4.34206	19.9485	4.31821	-0.23395	-0.0238592
H2afv	0.244934	1	0.168432	51.032	58.8351	60.8998	58.5152	58.7107	64.7539	38.3024	39.5252	39.2168	36.8967	35.7526	32.9957	56.9223	5.83092	60.6599	5.92267	39.0148	5.28595	35.215	5.13812	0.0917506	-0.147833
Smim15	0.260975	1	0.168737	19.9933	22.0269	25.8319	20.7811	25.8725	29.0097	34.0309	37.4995	36.2341	31.6026	35.1346	33.9784	22.6174	4.49936	25.2211	4.65656	35.9215	5.16678	33.5719	5.06918	0.1572	-0.097596
Zcchc11	-0.302436	1	0.168945	42.5033	38.2573	36.0781	41.7445	29.8529	34.3627	11.5569	11.9769	13.0982	14.2177	11.9595	14.7552	38.9462	5.28341	35.32	5.14241	12.2107	3.61007	13.6441	3.77021	-0.140997	0.160138
Dlg1	-0.230454	1	0.169002	73.4021	65.7909	62.4872	68.9058	64.8803	52.3212	26.7564	26.3615	26.2483	29.7532	27.7414	27.998	67.2268	6.07096	62.0357	5.95503	26.4554	4.72549	28.4975	4.83277	-0.115936	0.107274
Klhdc3	-0.263773	1	0.169684	94.514	109.12	108.956	76.9265	78.0155	76.4959	92.585	92.9167	92.8547	86.6934	79.1271	81.8061	104.197	6.70317	77.146	6.26952	92.7855	6.53583	82.5422	6.36706	-0.433646	-0.168767
Pcbp2	-0.243621	1	0.169759	624.547	666.604	616.646	581.871	542.526	513.542	235.441	222.364	233.875	245.816	232.014	224.959	635.933	9.31273	545.98	9.0927	230.56	7.849	234.263	7.87199	-0.220027	0.0229869
Vapa	-0.282728	1	0.170124	251.245	309.971	215.603	229.868	228.275	180.275	65.5792	57.9613	56.6725	64.2918	61.8231	54.5144	258.939	8.01647	212.806	7.7334	60.071	5.9086	60.2098	5.91193	-0.283076	0.00332871
Rad21	-0.249247	1	0.170427	556.318	530.82	482.003	496.741	477.447	428.239	148.862	135.907	140.942	153.158	145.208	153.218	523.047	9.0308	467.476	8.86875	141.904	7.14877	150.528	7.23389	-0.162049	0.0851175
Dync1li1	-0.24548	1	0.170577	115.486	123.467	113.429	120.494	114.834	94.109	16.6523	14.4596	14.2913	16.8763	16.4801	16.5209	117.461	6.87603	109.812	6.7789	15.1344	3.91976	16.6258	4.05535	-0.0971382	0.135587
Cry2	-0.218107	1	0.170789	60.3995	58.5452	56.1375	52.3173	54.7303	51.8031	22.2898	19.5614	19.9715	22.6328	20.211	22.3247	58.3607	5.86693	52.9502	5.72657	20.6076	4.3651	21.7228	4.44114	-0.14036	0.0760354
Lztr1	-0.223876	1	0.170789	98.988	82.6009	81.9694	85.8588	74.4332	74.7692	18.0291	17.1401	16.7553	18.2403	17.0294	18.7012	87.8528	6.45702	78.3537	6.29193	17.3082	4.11338	17.9903	4.16915	-0.165086	0.0557622
Smarca5	-0.273051	1	0.170789	198.675	205.053	177.071	183.384	186.282	170.432	105.573	92.2687	109.273	119.059	108.345	117.289	193.6	7.59693	180.033	7.49212	102.372	6.67767	114.898	6.84421	-0.104818	0.166535
Rab28	-0.339075	1	0.171115	11.1851	11.738	10.5348	11.1197	5.97058	8.2885	21.3791	21.4371	20.3865	19.7892	20.7488	20.4899	11.1526	3.47931	8.4596	3.08059	21.0676	4.39695	20.3427	4.34644	-0.398724	-0.0505162
Slc25a17	0.211658	1	0.171361	73.4021	66.6604	76.0526	89.3223	77.0204	76.1506	26.8106	23.3673	23.9399	24.436	23.3925	23.7603	72.0384	6.17069	80.8311	6.33684	24.7059	4.62679	23.8629	4.5767	0.166145	-0.0500866
Mllt3	0.213733	1	0.171524	63.4754	58.6901	71.8675	70.911	68.2636	74.7692	33.9442	32.0226	36.1044	34.6311	30.1104	32.5735	64.6777	6.0152	71.3146	6.15612	34.0237	5.08847	32.4383	5.01963	0.140929	-0.0688413
Leo1	-0.269013	1	0.171581	200.632	210.56	193.811	211.275	199.815	193.571	19.6879	19.1317	21.6834	26.6784	23.8846	22.271	201.668	7.65584	201.554	7.65502	20.1677	4.33397	24.278	4.60158	-0.000818244	0.267607
Prmt5	-0.143507	1	0.171581	326.465	330.549	319.075	311.17	316.241	298.386	73.862	75.8175	73.8428	74.4176	79.0928	80.3321	325.363	8.3459	308.599	8.26959	74.5075	6.21931	77.9475	6.28443	-0.0763149	0.0651181
Snx25	-0.435408	1	0.172391	7.41012	6.08638	6.92699	4.37497	8.15979	2.41748	16.5114	16.1307	18.3375	16.2059	15.8277	16.8203	6.80783	2.7672	4.98408	2.31733	16.9932	4.08688	16.2846	4.02544	-0.449869	-0.061444
Ubl3	-0.327811	1	0.172798	13.8415	14.9261	9.66892	11.302	9.15488	7.77047	28.632	26.8662	26.9227	26.1698	25.0062	24.4052	12.8122	3.67945	9.40912	3.23406	27.4736	4.77998	25.1937	4.65499	-0.445387	-0.124982
Shc1	0.225294	1	0.172922	48.0959	39.4166	48.3446	49.583	47.1675	53.7026	32.6324	33.5231	35.015	32.7585	30.7399	32.6042	45.2857	5.50098	50.151	5.64821	33.7235	5.07568	32.0342	5.00154	0.147224	-0.0741422
Ube2d3	-0.276255	1	0.173083	103.881	127.379	111.265	87.4994	103.689	89.4467	214.116	201.548	194.321	211.948	201.24	192.071	114.175	6.83511	93.545	6.54759	203.328	7.66767	201.753	7.65645	-0.287516	-0.0112219
Cyp51	-0.242346	1	0.173452	739.194	751.958	661.383	707.651	702.339	716.092	160.766	168.966	164.804	183.328	195.231	199.356	717.512	9.48686	708.694	9.46902	164.845	7.36497	192.638	7.58975	-0.0178403	0.224781
Zfpm1	-0.310324	1	0.173774	35.9321	36.3734	39.5416	23.6977	33.6342	24.6928	164.246	173.55	183.998	157.898	162.489	150.922	37.2824	5.22042	27.3416	4.77303	173.931	7.44237	157.103	7.29556	-0.447395	-0.146807
Pdcd2	-0.236575	1	0.173937	76.3382	62.8926	71.4346	60.1558	68.6616	61.473	21.39	19.2136	20.0753	21.7311	21.7788	20.9121	70.2218	6.13385	63.4302	5.9871	20.2263	4.33816	21.474	4.42452	-0.14675	0.0863637
Parn	-0.30522	1	0.173997	46.8375	46.6623	39.8302	42.4737	37.6146	31.5999	14.2455	13.8867	12.2682	12.5532	14.008	14.8396	44.4433	5.4739	37.2294	5.21837	13.4668	3.75134	13.8003	3.78663	-0.255525	0.0352906
Tstd2	-0.247214	1	0.174898	39.7071	39.7064	44.5925	35.3643	35.8235	37.1256	12.7711	14.9575	13.8763	14.4258	13.6876	15.3386	41.3353	5.3693	36.1045	5.1741	13.8683	3.79372	14.484	3.85639	-0.195198	0.0626682
Sec14l1	-0.247603	1	0.175078	42.783	47.5318	51.9524	37.9164	38.8087	38.3343	20.837	25.5158	28.5826	22.4709	23.0721	26.1632	47.4224	5.5675	38.3532	5.26127	24.9785	4.64261	23.9021	4.57906	-0.306223	-0.0635507
Myh9	-0.254776	1	0.175436	726.611	784.419	724.015	786.218	668.306	680.002	90.0698	82.8905	92.3619	102.229	92.7804	106.449	745.015	9.54113	711.509	9.47474	88.4407	6.46664	100.486	6.65085	-0.0663874	0.184214
Pigu	-0.244971	1	0.175447	64.0346	65.7909	73.8879	63.9839	63.2881	55.7747	15.102	16.383	16.5738	17.801	16.1024	17.35	67.9045	6.08543	61.0156	5.93111	16.0196	4.00177	17.0845	4.09461	-0.154329	0.0928486
Psmd11	-0.258541	1	0.175678	189.447	191.431	205.934	177.369	170.161	152.474	43.387	41.4759	40.2284	43.208	40.5707	43.6053	195.604	7.61179	166.668	7.38083	41.6971	5.38188	42.4613	5.40808	-0.23096	0.0262024
Banf1	0.276453	1	0.176256	279.767	326.201	345.484	306.612	333.755	337.929	131.57	140.511	110.751	102.876	112.408	110.51	317.151	8.30902	326.099	8.34917	127.611	6.99561	108.598	6.76285	0.0401413	-0.232752
Ppid	-0.267863	1	0.176987	117.583	141.436	116.027	105.728	116.824	123.119	88.1184	87.9718	92.9844	100.634	98.9375	99.1484	125.015	6.96596	115.224	6.8483	89.6915	6.4869	99.5732	6.63769	-0.117667	0.150786
Tlk2	-0.245822	1	0.177559	39.008	39.8513	33.4805	35.7289	39.6048	30.9092	35.7764	32.5069	31.9026	38.7462	35.9013	37.1029	37.4466	5.22676	35.4143	5.14626	33.3953	5.06157	37.2501	5.21917	-0.080502	0.157601
Cox14	0.315657	1	0.177786	39.008	44.4886	58.8794	54.1402	52.342	46.6228	28.903	32.7047	32.577	25.9155	28.7943	27.1305	47.4587	5.5686	51.035	5.67342	31.3949	4.97246	27.2801	4.76978	0.104817	-0.202679
Ap2s1	0.149741	1	0.178283	205.386	201.285	206.222	190.311	205.189	193.398	61.8064	67.0667	64.0646	52.5477	60.0721	54.261	204.298	7.67453	196.299	7.61691	64.3126	6.00703	55.6269	5.79771	-0.0576189	-0.209317
Olfm1	-0.279213	1	0.178283	43.3422	34.9243	41.7063	30.9894	27.2656	31.9453	48.7535	45.0363	45.0527	49.3343	41.0399	37.3716	39.9909	5.3216	30.0668	4.9101	46.2808	5.53234	42.5819	5.41217	-0.411503	-0.120172
Senp3	-0.271447	1	0.178356	43.6218	40.8657	50.5093	40.6508	35.4254	33.8447	51.9191	57.286	52.7301	50.8139	52.5302	56.1419	44.999	5.49182	36.6403	5.19536	53.9784	5.75431	53.162	5.73232	-0.296461	-0.0219877
Rasa3	-0.235054	1	0.178436	50.3329	41.7352	55.1273	46.1195	34.0323	45.5867	11.7845	11.7246	13.617	12.0908	11.2385	14.1564	49.0651	5.61663	41.9128	5.38932	12.3754	3.6294	12.4952	3.64331	-0.227306	0.0139081
Gemin5	-0.255432	1	0.178576	306.471	295.769	268.854	287.29	253.749	263.505	44.6338	44.4974	46.0642	49.1262	47.9409	51.7737	290.365	8.18172	268.181	8.06707	45.0651	5.49394	49.6136	5.63266	-0.114657	0.138724
Eif3c	-0.232606	1	0.17896	1408.48	1310.89	1160.42	1277.67	1219.39	1149.68	189.268	180.643	185.268	206.376	200.931	206.051	1293.26	10.3368	1215.58	10.2474	185.06	7.53185	204.453	7.67562	-0.0893676	0.143775
Ctcf	-0.258668	1	0.179366	234.887	229.689	193.234	214.738	204.393	190.981	71.4986	62.6129	68.1626	81.6305	70.6697	72.4094	219.27	7.77656	203.371	7.66797	67.4247	6.07521	74.9032	6.22696	-0.108597	0.15175
Ftl1	-0.500349	1	0.179476	15.7989	11.5931	6.92699	7.29162	11.3441	3.45354	362.458	371.742	310.596	307.172	327.77	294.428	11.4397	3.51597	7.36308	2.88031	348.266	8.44404	309.79	8.27515	-0.635665	-0.168897
Ndc80	-0.256348	1	0.17955	103.322	109.12	92.7928	97.7076	98.9125	100.843	14.1154	14.0572	16.1329	15.8129	16.4801	18.9008	101.745	6.66882	99.1545	6.63161	14.7685	3.88445	17.0646	4.09293	-0.0372084	0.208481
Med27	0.197308	1	0.180571	66.1318	68.2545	64.6519	69.6349	80.2047	73.0424	13.2915	14.2959	12.9945	12.4145	13.9394	13.2121	66.3461	6.05194	74.294	6.21517	13.5273	3.7578	13.1887	3.72123	0.163235	-0.0365749
Zfp106	-0.276996	1	0.180651	160.646	134.915	121.655	144.921	117.819	107.06	132.308	118.93	122.656	138.363	121.735	140.297	139.072	7.11969	123.267	6.94564	124.631	6.96152	133.465	7.06032	-0.174049	0.098792
Naca	0.269066	1	0.180735	100.526	116.511	91.7826	104.999	136.129	131.58	223.895	239.852	228.506	216.155	249.169	228.644	102.94	6.68566	124.236	6.95694	230.751	7.85019	231.323	7.85376	0.271284	0.00357097
Pcm1	-0.286475	1	0.180801	137.716	141.001	104.915	146.744	124.387	120.529	24.7291	19.6569	21.9687	28.5279	25.7272	27.7677	127.878	6.99862	130.553	7.02849	22.1182	4.46716	27.3409	4.77299	0.0298738	0.305827
Pqbp1	0.259088	1	0.181103	165.959	193.17	184.431	213.097	205.985	217.746	30.8653	30.4675	31.1504	31.7645	30.8085	28.1515	181.187	7.50133	212.276	7.7298	30.8277	4.94616	30.2415	4.91846	0.228464	-0.0276985
Dnlz	0.253506	1	0.181121	18.735	16.9549	18.3277	17.6822	19.7029	21.0666	17.4979	17.3106	17.6631	16.6682	15.3585	15.83	18.0059	4.1704	19.4839	4.28421	17.4906	4.1285	15.9522	3.99569	0.113814	-0.132818
Ttc9c	-0.256857	1	0.181268	29.6405	32.8955	39.6859	26.979	27.6637	29.1824	27.8622	34.6281	36.2341	30.4005	30.9917	35.4908	34.0739	5.0906	27.9417	4.80435	32.9081	5.04037	32.2943	5.01321	-0.28625	-0.0271644
Vps26b	-0.239468	1	0.181553	61.2383	61.7333	56.4261	48.307	51.944	52.6665	21.6827	25.3453	25.2108	22.101	23.7359	26.5854	59.7993	5.90206	50.9725	5.67165	24.0796	4.58974	24.1408	4.5934	-0.230409	0.00366148
Tpr	-0.295188	1	0.181861	305.912	290.842	233.93	360.206	276.04	352.779	68.604	59.3254	69.4076	95.224	88.9923	101.897	276.895	8.11319	329.675	8.3649	65.779	6.03955	95.371	6.57548	0.251706	0.535925
Alg11	0.23508	1	0.182234	47.1172	52.4588	43.8709	53.5934	61.4969	50.4217	22.7018	20.5981	20.1531	22.2166	20.2567	19.6301	47.8157	5.57941	55.1707	5.78583	21.151	4.40265	20.7011	4.37164	0.206418	-0.0310151
Nle1	-0.256134	1	0.182234	112.41	97.672	103.905	98.0722	95.1312	70.9703	35.8089	31.7771	34.1332	36.4343	33.8413	31.3989	104.662	6.7096	88.0579	6.46038	33.9064	5.08349	33.8915	5.08285	-0.249218	-0.000632435
Lyl1	0.268282	1	0.182291	53.8282	62.4579	75.764	53.2288	73.4381	81.8489	53.4152	63.8269	57.9434	45.6585	56.5357	56.211	64.0167	6.00038	69.5053	6.11905	58.3952	5.86778	52.8017	5.72251	0.118674	-0.145264
Tomm34	-0.278412	1	0.182652	122.617	132.741	112.419	104.999	100.505	99.1166	18.994	21.7645	18.7266	16.9919	20.4971	22.2479	122.592	6.93772	101.54	6.66591	19.8283	4.30949	19.9123	4.31559	-0.271818	0.00609572
Ddx1	-0.24784	1	0.182908	618.535	600.958	541.748	557.809	556.458	514.578	94.8617	93.36	85.6961	94.045	101.49	104.707	587.081	9.19741	542.948	9.08467	91.3059	6.51264	100.08	6.64502	-0.112745	0.132379
Rhog	0.253547	1	0.183001	47.9561	51.7343	59.0237	48.6715	62.492	51.6304	52.8623	64.1202	59.0587	42.3757	52.7362	56.4106	52.9047	5.72532	54.2647	5.76194	58.6804	5.87481	50.5075	5.65843	0.0366176	-0.216382
Slc25a37	0.328719	1	0.183563	13.9814	19.4185	19.1935	14.2186	29.0568	22.2753	84.5949	102.998	95.2409	85.7686	97.0492	94.6497	17.5311	4.13185	21.8503	4.44958	94.2778	6.55885	92.4892	6.53121	0.317733	-0.0276332
Nhlrc2	-0.239327	1	0.183955	84.3076	92.7449	84.9999	73.6453	81.0008	67.3441	18.0508	16.7991	16.9628	17.1537	16.3771	18.0793	87.3508	6.44875	73.9967	6.20939	17.2709	4.11027	17.2034	4.10462	-0.23936	-0.00565316
Dtd1	0.24299	1	0.184023	46.1385	42.17	52.3854	51.2236	49.5558	51.2851	16.4897	14.6915	15.1732	13.9634	14.6833	13.6958	46.8979	5.55145	50.6882	5.66358	15.4515	3.94967	14.1141	3.81907	0.112124	-0.130601
Fam69a	-0.222155	1	0.184191	33.6951	37.6776	39.3973	32.2654	31.8431	30.0458	10.1909	11.4517	10.2451	10.0333	10.9409	10.8246	36.9233	5.20646	31.3848	4.97199	10.6292	3.40997	10.5996	3.40594	-0.234468	-0.00402944
Gp5	-0.263637	1	0.184325	180.919	188.533	229.457	145.103	144.886	137.624	35.5379	35.8967	36.8566	28.9671	32.3535	31.8595	199.636	7.64123	142.538	7.1552	36.0971	5.17381	31.0601	4.95699	-0.48603	-0.21682
Acaa1a	-0.240145	1	0.184351	30.759	35.6488	31.6044	25.7029	30.4499	26.5923	12.5759	13.266	11.7236	12.5763	12.257	12.7361	32.6707	5.02993	27.5817	4.78564	12.5218	3.64637	12.5232	3.64653	-0.244287	0.00015269
Wtip	-0.492866	1	0.18447	6.71105	5.2169	4.76231	4.55726	4.37842	2.07212	28.8705	27.5278	27.1302	29.8688	25.2923	21.9255	5.56342	2.47597	3.66927	1.87549	27.8428	4.79923	25.6955	4.68345	-0.600479	-0.115789
Mettl14	-0.19263	1	0.184637	79.9734	82.3111	81.1035	79.6609	79.4087	76.3233	17.2486	17.9859	17.4816	18.4715	19.5701	20.1368	81.1293	6.34215	78.4643	6.29396	17.572	4.13521	19.3928	4.27745	-0.0481877	0.14224
Polrmt	-0.278804	1	0.184823	17.4767	17.9693	17.0289	14.7655	17.7127	13.1235	9.78972	11.6154	12.0867	10.4032	11.9824	12.406	17.4916	4.12859	15.2006	3.92605	11.1639	3.48078	11.5972	3.5357	-0.20254	0.0549297
Btrc	0.19104	1	0.185103	67.53	65.646	79.949	69.4526	70.4528	81.8489	21.52	21.6758	23.8102	19.1419	19.387	22.8007	71.0417	6.15059	73.9181	6.20786	22.3354	4.48126	20.4432	4.35355	0.0572627	-0.12771
Srrm2	-0.334322	1	0.185127	1304.46	1046.71	772.792	1268.92	787.121	794.487	112.782	97.1727	96.0968	119.267	107.086	121.197	1041.32	10.0242	950.177	9.89205	102.017	6.67267	115.85	6.85611	-0.132148	0.183443
Rpl36a	0.742949	1	0.185146	1.53795	1.0144	1.29881	3.09894	2.78627	1.72677	57.8494	75.4151	86.8632	74.487	96.6258	84.2704	1.28372	0.36033	2.53733	1.34331	73.3759	6.19723	85.1277	6.41156	0.982979	0.214322
Polr2d	0.289548	1	0.185155	79.2743	77.529	96.112	90.9629	102.097	93.0729	41.4789	41.4896	37.3234	40.8268	37.5036	33.1646	84.3051	6.39755	95.3776	6.57558	40.0973	5.32543	37.165	5.21587	0.17803	-0.109561
Foxp4	-0.292625	1	0.185263	16.9174	14.7812	13.9983	11.4843	12.3392	10.706	25.3037	24.6086	23.3174	23.9967	21.4813	22.2326	15.2323	3.92906	11.5098	3.52479	24.4099	4.6094	22.5702	4.49635	-0.40427	-0.113048
Tusc1	0.41851	1	0.18592	8.249	6.08638	6.63837	7.47391	9.15488	7.07976	20.7612	14.0299	14.3432	17.9629	13.2184	10.5712	6.99125	2.80555	7.90285	2.98237	16.3781	4.0337	13.9175	3.79883	0.176822	-0.234868
Ptdss1	0.234405	1	0.1861	42.6431	42.025	52.674	45.208	54.1332	55.2567	36.6437	39.5116	37.6347	33.8913	36.7826	38.5846	45.7807	5.51667	51.5326	5.68741	37.93	5.24527	36.4195	5.18664	0.170746	-0.0586283
Ppat	-0.13541	1	0.186121	479.421	494.591	465.551	478.148	462.919	468.818	73.2115	66.3096	69.5632	78.1627	73.2447	73.3691	479.854	8.90645	469.962	8.8764	69.6948	6.12298	74.9255	6.22738	-0.0300544	0.104406
Pip4k2c	-0.206457	1	0.18617	87.3835	86.8034	93.803	65.0777	75.0302	73.7331	48.786	50.3563	52.1076	44.3177	44.0841	50.9138	89.33	6.48107	71.2803	6.15543	50.4166	5.65583	46.4385	5.53725	-0.32564	-0.118577
Arl8a	0.280283	1	0.186384	44.3209	34.6344	32.326	45.7549	39.2068	41.4425	14.9285	13.798	14.2135	12.5301	12.9895	14.3637	37.0938	5.2131	42.1347	5.39694	14.3134	3.83929	13.2944	3.73275	0.183833	-0.106542
Cyba	0.291599	1	0.186598	113.529	125.785	174.041	130.52	163.793	167.669	33.8792	38.7954	38.9315	32.5274	36.3019	33.4026	137.785	7.10627	153.994	7.26673	37.202	5.21731	34.0773	5.09074	0.160457	-0.126571
Timm17b	0.328541	1	0.186658	52.9893	53.908	75.6196	52.6819	69.6567	73.7331	32.7625	33.5368	30.9429	26.586	29.0118	28.0748	60.839	5.92692	65.3572	6.03028	32.4141	5.01855	27.8908	4.80172	0.103351	-0.216829
Zfp68	-0.282381	1	0.186721	22.6498	28.693	31.4601	22.0571	27.4646	28.4917	11.9038	11.8337	11.9829	11.5591	14.5917	15.1621	27.6009	4.78665	26.0045	4.70069	11.9068	3.57371	13.771	3.78356	-0.0859564	0.209844
Ndufs6	0.337838	1	0.186948	68.5087	55.0673	82.9796	76.9265	92.3449	92.9003	39.7335	44.4565	51.7445	46.4908	46.7736	42.5382	68.8518	6.10542	87.3906	6.44941	45.3115	5.5018	45.2675	5.5004	0.343982	-0.00139997
Capza1	-0.495973	1	0.187492	4.33422	5.79656	3.4635	2.18748	4.37842	3.45354	38.0639	38.5976	39.6837	40.6187	37.9842	41.4865	4.53142	2.17996	3.33982	1.73977	38.7818	5.27731	40.0298	5.323	-0.440196	0.045697
Trappc8	-0.226734	1	0.187492	89.2011	94.4839	93.9473	85.6765	73.8361	99.2893	21.3141	20.5026	22.0206	23.7193	21.2638	24.766	92.5441	6.53207	86.2673	6.43074	21.2791	4.41136	23.2497	4.53914	-0.101327	0.127776
Extl3	0.271887	1	0.187822	22.7896	23.3311	20.2037	23.3332	22.0911	22.6207	34.4971	37.9292	40.0987	32.3655	30.3393	32.7654	22.1082	4.46651	22.6817	4.50345	37.5083	5.22914	31.8234	4.99202	0.0369476	-0.237123
Mbtd1	-0.290187	1	0.187887	21.6711	25.6498	22.2241	19.5051	20.897	19.6852	23.981	18.9339	20.9572	24.3204	20.7946	22.1251	23.1817	4.53491	20.0291	4.32403	21.2907	4.41215	22.4134	4.48629	-0.210887	0.0741363
Tbc1d22b	-0.328644	1	0.18797	12.024	10.2889	11.6893	9.11452	9.55292	7.77047	16.6414	15.1349	16.5219	16.9225	15.0953	14.8473	11.3341	3.50259	8.81264	3.13957	16.0994	4.00894	15.6217	3.96548	-0.363018	-0.043455
Rsbn1l	0.204639	1	0.188008	53.269	44.0538	49.6434	57.7861	53.9342	61.1277	29.3583	25.2498	31.3579	29.2214	27.0776	30.9229	48.9887	5.61438	57.616	5.8484	28.6553	4.84073	29.074	4.86166	0.234019	0.0209262
Zcrb1	-0.277306	1	0.188021	19.7137	23.1862	23.09	20.9634	16.1206	16.2316	32.3397	35.542	35.2744	33.7064	35.455	32.1129	21.9966	4.45921	17.7719	4.15152	34.3854	5.10372	33.7581	5.07716	-0.307688	-0.0265619
Tab3	-0.312623	1	0.188162	20.972	19.7083	17.0289	18.229	18.5088	15.8863	13.0096	12.0179	13.176	14.5876	12.4058	16.0603	19.2364	4.26577	17.5414	4.13269	12.7345	3.67067	14.3512	3.8431	-0.133077	0.172433
Arf4	0.139847	1	0.188388	299.9	335.621	347.504	328.305	344.9	352.952	72.019	75.4628	71.6122	64.5461	70.5552	73.2539	327.675	8.35612	342.052	8.41807	73.0314	6.19044	69.4517	6.11794	0.061952	-0.072505
Ran	-0.251451	1	0.188388	496.478	470.68	394.117	440.049	393.461	329.641	293.659	288.476	292.674	306.941	305.304	278.544	453.758	8.82578	387.717	8.59886	291.603	8.18786	296.93	8.21398	-0.226921	0.0261163
Mkln1	-0.238225	1	0.188447	775.686	803.982	716.655	742.469	718.061	740.957	78.6972	72.1139	78.5115	90.9009	82.6978	85.6446	765.441	9.58015	733.829	9.5193	76.4409	6.25627	86.4144	6.4332	-0.0608472	0.176928
Top2a	-0.238438	1	0.188531	1306.28	1249.01	1127.22	1319.78	1169.24	1253.12	181.289	157.671	181.689	203.024	196.628	222.426	1227.5	10.2615	1247.38	10.2847	173.55	7.43921	207.359	7.69599	0.0231713	0.256783
Tsc2	-0.218858	1	0.188548	122.057	117.525	113.718	116.301	100.704	94.2817	33.5539	33.0048	32.7585	34.3075	32.6854	34.5388	117.767	6.87979	103.762	6.69714	33.1057	5.04901	33.8439	5.08082	-0.182652	0.0318147
Trim41	0.281887	1	0.189048	11.8842	12.3177	14.8642	12.3957	15.1255	15.5409	21.5851	23.9266	22.3059	19.8123	21.0922	20.9121	13.022	3.70288	14.354	3.84339	22.6059	4.49862	20.6055	4.36496	0.140506	-0.133663
Tbc1d22a	-0.320601	1	0.189207	17.3369	15.216	15.2971	13.3072	14.7274	9.32456	11.6761	11.6086	9.95983	10.4032	10.6663	10.9397	15.95	3.99548	12.4531	3.63843	11.0815	3.47008	10.6697	3.41545	-0.357055	-0.0546329
Ddx42	-0.265474	1	0.189232	232.65	224.762	192.946	244.634	194.442	191.326	39.0613	36.2036	37.505	44.0171	41.6007	45.0716	216.786	7.76013	210.134	7.71516	37.59	5.23228	43.5632	5.44504	-0.0449603	0.21276
Znf512b	-0.331369	1	0.189544	18.735	13.9117	15.4414	15.1301	13.1353	10.0153	19.1241	16.6149	14.9657	17.5236	15.4043	17.4345	16.0294	4.00265	12.7602	3.67358	16.9016	4.07909	16.7875	4.06931	-0.329067	-0.00977441
Ddhd2	-0.200573	1	0.189781	40.9654	42.6047	44.4482	37.1872	40.5999	40.2338	11.1015	11.6973	12.0089	11.6978	12.0625	13.12	42.6728	5.41524	39.3403	5.29794	11.6026	3.53637	12.2934	3.61982	-0.117307	0.0834449
Nup43	-0.198053	1	0.190246	97.4501	100.86	114.44	97.3431	94.1361	99.6347	13.9962	15.1621	15.8216	15.1656	16.2054	16.7435	104.25	6.7039	97.0379	6.60048	14.9933	3.90625	16.0382	4.00344	-0.103426	0.0971902
Polg	-0.261836	1	0.190387	56.7643	61.2986	52.5297	42.6559	48.3617	45.2414	38.3892	43.4198	48.2948	39.9483	39.3461	44.5496	56.8642	5.82945	45.4197	5.50525	43.3679	5.43856	41.2813	5.36742	-0.324203	-0.0711382
Kpna3	-0.249277	1	0.190454	257.257	277.22	249.66	258.305	249.371	221.545	70.1326	63.7928	64.0127	73.4697	71.2648	73.4535	261.379	8.03	243.074	7.92525	65.9794	6.04394	72.7293	6.18447	-0.10475	0.140523
Kif1c	-0.439146	1	0.191317	6.71105	5.79656	6.49405	3.64581	4.97548	4.4896	11.6002	11.0766	10.7379	9.82525	10.2199	11.1009	6.33389	2.66309	4.3703	2.12773	11.1383	3.47745	10.382	3.37602	-0.53536	-0.101435
Nub1	-0.243384	1	0.191535	151.558	131.292	139.261	131.067	130.756	124.846	24.5556	25.0656	22.5652	24.9908	26.4368	26.785	140.704	7.13652	128.889	7.00999	24.0622	4.58869	26.0709	4.70437	-0.126528	0.115672
Prrc1	-0.202456	1	0.191579	59.5606	51.0097	52.674	49.2184	48.5607	42.1332	15.8392	13.5593	14.3951	15.2812	13.5732	14.0412	54.4148	5.76593	46.6374	5.54342	14.5979	3.86768	14.2985	3.83779	-0.22251	-0.0298914
Rpl13a	-0.26143	1	0.191839	422.377	439.669	493.837	378.253	403.81	309.61	673.8	782.654	767.141	673.411	762.225	706.737	451.961	8.82005	363.891	8.50736	741.198	9.53372	714.124	9.48003	-0.312692	-0.0536841
Mrps16	-0.328431	1	0.192412	29.9201	40.5759	41.5619	26.2498	28.4597	31.5999	29.7269	28.1485	30.0611	30.0999	29.6069	25.6872	37.3526	5.22314	28.7698	4.84648	29.3122	4.87343	28.4647	4.8311	-0.376654	-0.0423268
Rcc1	-0.158596	1	0.192412	105.979	109.555	110.832	89.14	101.102	102.398	47.42	52.6685	53.3785	49.08	51.8664	52.4262	108.788	6.76538	97.5464	6.60802	51.1557	5.67682	51.1242	5.67593	-0.157365	-0.000887224
Cd48	-0.215832	1	0.192639	114.228	132.741	140.416	103.541	108.863	110.513	14.6358	16.8195	16.1069	13.2467	15.7018	17.373	129.128	7.01266	107.639	6.75006	15.8541	3.98678	15.4405	3.94865	-0.2626	-0.0381315
Capzb	-0.124844	1	0.192956	844.893	854.702	903.106	780.203	784.534	767.204	145.458	164.021	160.68	144.535	156.709	158.046	867.567	9.76083	777.314	9.60235	156.72	7.29204	153.097	7.2583	-0.158479	-0.0337423
Cers2	0.246917	1	0.193054	459.707	436.915	412.445	512.601	501.926	516.995	102.776	111.496	95.8893	96.7267	102.405	106.526	436.356	8.76936	510.507	8.99579	103.387	6.69191	101.886	6.67081	0.226427	-0.0210999
Bmp2k	-0.236919	1	0.19368	132.543	131.727	108.379	115.754	117.421	104.297	36.1884	35.351	31.4876	39.3704	34.4937	36.0972	124.216	6.95671	112.491	6.81366	34.3423	5.10192	36.6538	5.19589	-0.143045	0.0939727
Ehbp1l1	-0.15134	1	0.194686	130.027	142.305	145.755	119.036	127.77	132.443	60.4404	63.1858	67.8773	63.5289	64.5583	64.7171	139.363	7.1227	126.416	6.98204	63.8345	5.99626	64.2681	6.00603	-0.140659	0.00976616
Pml	0.227165	1	0.195196	45.1598	47.6767	58.4465	47.9424	62.691	63.3725	31.7651	36.2582	35.3522	31.4639	33.4751	36.9033	50.4277	5.65614	58.002	5.85803	34.4585	5.10679	33.9474	5.08523	0.201887	-0.0215568
Lrrc47	-0.264421	1	0.195374	159.108	144.479	145.322	145.285	131.353	98.7713	76.7133	70.6884	71.8716	79.781	70.6697	68.6477	149.637	7.22532	125.136	6.96736	73.0911	6.19162	73.0328	6.19047	-0.25796	-0.0011514
Msh2	-0.24803	1	0.195542	306.052	286.785	270.586	282.915	273.85	280.255	32.047	29.7241	34.2629	37.5209	34.5509	38.2468	287.807	8.16896	279.007	8.12416	32.0113	5.00051	36.7729	5.20057	-0.0448041	0.20006
Tecr	-0.251027	1	0.195542	125.133	137.668	145.611	100.442	128.168	107.923	74.9678	81.5127	78.6671	75.5735	78.2459	76.0867	136.138	7.08892	112.178	6.80964	78.3825	6.29246	76.6354	6.25994	-0.279277	-0.0325219
Spg7	-0.251084	1	0.195631	41.6644	55.502	50.6536	40.2862	43.5852	33.672	24.7833	25.6454	24.0696	22.7021	24.0334	23.7066	49.2734	5.62274	39.1811	5.29209	24.8328	4.63417	23.4807	4.5534	-0.330649	-0.080769
Nsdhl	-0.142673	1	0.195741	219.088	226.935	255.433	196.327	219.717	253.49	55.1715	61.5079	70.6526	59.83	63.2079	73.6685	233.819	7.86925	223.178	7.80205	62.444	5.96449	65.5688	6.03494	-0.0671953	0.0704454
Slc45a3	0.392505	1	0.195741	5.73236	5.94147	10.6791	7.29162	7.96077	7.42511	15.3513	16.4649	15.8735	11.4204	12.1197	13.6343	7.45098	2.89743	7.55917	2.91823	15.8966	3.99064	12.3915	3.63128	0.0207969	-0.359365
Eef1e1	0.153874	1	0.195799	113.668	120.568	123.387	130.52	124.586	121.91	60.2236	60.8941	59.7849	59.83	58.6072	53.3014	119.208	6.89734	125.672	6.97352	60.3009	5.91411	57.2462	5.83911	0.0761826	-0.0749994
Atad1	-0.250449	1	0.195849	152.816	178.244	183.277	156.952	162.002	158.863	41.9776	39.2865	41.4734	46.1902	44.7937	44.826	171.446	7.42161	159.272	7.31535	40.9125	5.35447	45.27	5.50048	-0.106257	0.146012
Dennd1a	-0.244699	1	0.195855	29.0812	28.9828	26.4092	22.2394	25.8725	22.6207	14.4949	12.5771	12.761	13.7091	12.2685	13.3887	28.1577	4.81546	23.5775	4.55934	13.2777	3.73093	13.1221	3.71393	-0.256117	-0.0170053
Clcn2	-0.214517	1	0.196217	35.0932	31.4463	32.1816	32.4477	28.6588	26.7649	14.2347	12.2361	11.8014	14.5645	12.1312	12.905	32.9071	5.04033	29.2905	4.87236	12.7574	3.67326	13.2002	3.72249	-0.167966	0.0492299
Fkrp	0.441073	1	0.196353	4.33422	5.07199	5.05093	4.01039	5.97058	5.52567	14.7442	15.6669	14.3951	11.3973	11.6276	12.4598	4.81905	2.26875	5.16888	2.36985	14.9354	3.90066	11.8282	3.56416	0.101103	-0.336502
Zfp646	-0.236974	1	0.196353	31.5979	31.5912	29.4397	28.8019	27.6637	28.6644	25.8349	25.1816	24.9255	26.1698	26.494	29.5718	30.8763	4.94843	28.3766	4.82663	25.314	4.66186	27.4119	4.77673	-0.121794	0.114866
Rab5a	0.224648	1	0.196361	23.3489	21.0125	25.1103	26.979	24.6784	28.6644	17.7798	16.3285	17.4556	17.0381	16.7318	17.3193	23.1572	4.53339	26.7739	4.74276	17.188	4.10333	17.0298	4.08999	0.209365	-0.0133407
Diablo	0.287799	1	0.196681	66.1318	56.0817	58.5908	80.0255	55.1283	68.3801	23.5691	25.659	24.5365	22.5634	23.3696	22.0714	60.2681	5.91332	67.8446	6.08416	24.5882	4.61989	22.6681	4.50259	0.17084	-0.117299
Ptpn12	-0.225461	1	0.197335	116.325	119.699	108.09	110.468	112.048	91.1735	34.7356	35.3442	36.0785	38.33	37.4921	36.9264	114.705	6.84178	104.563	6.70823	35.3861	5.14511	37.5828	5.232	-0.133549	0.086891
Wapl	-0.25197	1	0.19745	550.166	577.482	460.068	509.866	497.548	465.365	131.982	128.2	130.878	142.894	137.448	151.536	529.239	9.04777	490.926	8.93936	130.353	7.02629	143.959	7.16952	-0.108412	0.143233
Ctdsp1	0.260578	1	0.19864	32.8562	24.2006	24.6774	31.7185	27.0666	27.1103	51.1928	51.0588	49.5139	44.8263	43.386	44.8413	27.2447	4.76791	28.6318	4.83955	50.5885	5.66074	44.3512	5.4709	0.0716412	-0.189836
Tspan32	0.253899	1	0.19864	90.8788	116.366	121.944	109.921	125.78	123.119	55.5727	69.604	60.8743	46.6064	61.2165	64.1183	109.73	6.77781	119.607	6.90215	62.017	5.95459	57.3137	5.84081	0.124346	-0.113783
Lrch3	-0.24018	1	0.198798	58.0226	53.3283	50.5093	52.135	51.745	43.86	15.5465	12.8431	12.5276	15.0269	13.6533	15.1007	53.9534	5.75364	49.2467	5.62195	13.6391	3.76967	14.5936	3.86726	-0.131688	0.0975893
Naa30	-0.214055	1	0.198852	41.8043	43.764	41.5619	39.1924	40.7989	33.3267	24.7941	23.1831	23.6027	24.4822	24.537	24.5357	42.3767	5.4052	37.7727	5.23927	23.86	4.57652	24.5183	4.61579	-0.165929	0.0392642
Golph3	-0.25146	1	0.19909	261.871	285.336	303.056	218.748	242.803	235.704	181.007	163.973	169.369	175.93	162.374	164.027	283.421	8.1468	232.419	7.86058	171.45	7.42164	167.444	7.38753	-0.286219	-0.0341111
Pon2	0.219756	1	0.19909	92.8362	88.6873	85.1443	102.812	100.903	90.1374	30.3774	29.0761	31.8767	31.88	27.2836	27.2764	88.8893	6.47394	97.9506	6.61398	30.4434	4.92806	28.8134	4.84867	0.140046	-0.0793917
Xpo1	-0.262905	1	0.199103	566.385	626.318	490.085	547.236	506.305	491.784	101.117	96.9954	104.475	111.129	103.069	118.924	560.929	9.13167	515.108	9.00873	100.862	6.65624	111.041	6.79495	-0.122943	0.138704
Kif11	-0.252246	1	0.199325	372.743	366.777	328.888	349.451	310.868	319.28	53.4369	49.2036	52.7819	55.7381	52.1296	61.462	356.136	8.47628	326.533	8.35108	51.8075	5.69509	56.4432	5.81873	-0.1252	0.12364
Dusp8	-0.660824	1	0.199327	2.51664	2.46354	2.88625	1.64061	2.38823	0.863385	11.687	11.3085	9.10391	11.2817	10.1055	9.7114	2.62214	1.39075	1.63074	0.705529	10.6998	3.41951	10.3662	3.37381	-0.685217	-0.045697
Ranbp3	0.150316	1	0.199373	118.981	133.756	133.056	138.723	138.318	138.314	59.4105	61.2078	58.1509	54.952	60.0835	58.7674	128.598	7.00672	138.452	7.11324	59.5898	5.89699	57.9343	5.85635	0.106521	-0.0406458
Rtel1	0.227902	1	0.19947	25.5859	23.9108	24.966	28.255	28.4597	26.2469	17.9641	17.5289	16.5478	16.622	15.8735	17.0276	24.8209	4.63348	27.6539	4.78941	17.3469	4.11661	16.5077	4.04507	0.155927	-0.0715424
Scamp4	0.237418	1	0.19947	51.731	55.3571	61.7657	63.4371	56.7205	51.8031	36.8822	38.4885	34.6	31.5564	32.6625	30.7617	56.2846	5.81467	57.3202	5.84097	36.6569	5.19601	31.6602	4.9846	0.0263037	-0.211414
Alg2	-0.212608	1	0.199631	63.755	69.9934	60.3225	60.3381	53.7352	56.9834	15.0478	15.5918	16.2107	15.443	15.8849	16.3674	64.6903	6.01548	57.0189	5.83337	15.6168	3.96502	15.8984	3.99081	-0.182109	0.025789
Smap1	-0.242876	1	0.199631	143.449	138.393	116.316	120.129	125.183	109.305	55.8437	52.3752	49.9548	56.2235	55.4256	54.8521	132.719	7.05223	118.206	6.88516	52.7246	5.7204	55.5004	5.79443	-0.167077	0.0740238
Sec24b	-0.219335	1	0.200456	86.6844	81.5865	83.4125	80.3901	79.8067	66.4807	16.2295	16.3012	16.8332	17.0844	16.5831	17.7876	83.8945	6.3905	75.5591	6.23953	16.4546	4.04042	17.1517	4.10028	-0.15097	0.0598584
Capg	-0.20583	1	0.200793	35.0932	38.9818	39.8302	32.4477	34.0323	32.636	9.18261	10.7219	10.9454	9.27041	10.7578	10.7862	37.9684	5.24673	33.0386	5.04608	10.2833	3.36224	10.2715	3.36057	-0.200645	-0.0016654
Rnf44	0.238262	1	0.200793	40.5459	34.9243	48.7776	47.2132	42.5901	43.1693	40.8393	41.51	44.3783	39.1623	35.8784	40.4347	41.4159	5.37211	44.3242	5.47002	42.2425	5.40062	38.4918	5.26648	0.097909	-0.134145
Zw10	-0.2204	1	0.200793	89.3409	78.3984	84.7113	92.0566	82.792	76.6686	13.0421	12.7477	12.4239	14.1715	14.6032	15.3693	84.1502	6.3949	83.8391	6.38955	12.7379	3.67105	14.7147	3.87918	-0.005344	0.208129
Cdc34	-0.297293	1	0.201247	40.6858	38.9818	41.129	36.0935	31.6441	23.3114	139.485	127.34	133.083	139.241	123.99	106.058	40.2655	5.33147	30.3497	4.92361	133.303	7.05856	123.096	6.94364	-0.407866	-0.11492
Atxn1l	-0.499177	1	0.201344	4.89348	3.18811	4.90662	2.73436	3.38333	2.93551	16.4029	14.0777	14.8619	14.9113	14.2026	15.1697	4.3294	2.11417	3.01773	1.59346	15.1142	3.91783	14.7612	3.88374	-0.520703	-0.0340926
Prdm2	-0.217546	1	0.201508	29.6405	33.7649	34.202	30.4425	29.8529	31.4272	14.3214	13.9685	15.4326	15.9978	14.5803	17.3116	32.5358	5.02396	30.5742	4.93424	14.5742	3.86534	15.9632	3.99668	-0.0897139	0.13134
Myeov2	0.374663	1	0.201865	74.8003	99.7008	98.2767	100.077	122.596	129.508	52.5805	52.2592	62.3008	63.7601	56.2725	45.6858	90.9259	6.50662	117.394	6.87521	55.7135	5.79996	55.2395	5.78763	0.368591	-0.0123279
Mob3c	0.321599	1	0.202152	8.10919	7.39061	8.80305	8.56765	11.7421	10.8787	9.99571	11.2608	11.4642	10.357	11.3987	11.7612	8.10095	3.01809	10.3961	3.37798	10.9069	3.44717	11.1723	3.48185	0.359886	0.0346838
Snw1	-0.240704	1	0.202166	408.116	396.629	341.154	379.893	361.021	346.563	72.5068	71.3023	72.8053	80.5208	82.5262	79.9406	381.967	8.5773	362.492	8.50181	72.2048	6.17402	80.9958	6.33978	-0.0754959	0.165753
Tmem194	-0.214486	1	0.202526	32.7164	33.62	35.7895	28.9842	29.4548	33.4994	10.5811	11.0493	12.4239	10.7269	11.124	13.6881	34.042	5.08924	30.6461	4.93763	11.3514	3.5048	11.8463	3.56637	-0.151609	0.0615641
Aldh18a1	-0.134165	1	0.202738	397.909	394.89	397.292	387.549	378.335	367.284	66.0237	62.3946	64.5055	70.2101	63.4253	67.9798	396.697	8.63189	377.723	8.56118	64.3079	6.00693	67.2051	6.0705	-0.0707097	0.063573
Atp5e	0.254184	1	0.203064	490.466	472.274	568.158	555.803	568.399	554.121	102.689	111.455	111.114	101.027	107.727	90.197	510.299	8.9952	559.441	9.12784	108.42	6.76048	99.6502	6.6388	0.132642	-0.12168
Pdcd6ip	-0.243963	1	0.203243	291.791	290.842	270.73	263.41	253.55	239.848	48.6342	51.1475	50.1364	49.473	52.3127	55.4663	284.454	8.15205	252.269	7.97882	49.9727	5.64307	52.4173	5.71197	-0.173231	0.0689045
Slc25a23	0.365345	1	0.203319	5.73236	7.68044	6.34974	7.83849	8.55783	6.38905	15.579	16.1238	15.6141	14.0096	13.7563	14.4481	6.58751	2.71973	7.59512	2.92507	15.7723	3.97932	14.0713	3.81469	0.205339	-0.164635
Smarcd1	-0.263092	1	0.203379	55.3662	42.7496	43.1494	42.1091	47.1675	30.5638	19.4494	17.0105	14.5766	19.0957	16.4572	15.9374	47.0884	5.5573	39.9468	5.32001	17.0122	4.08849	17.1634	4.10127	-0.237291	0.0127705
Slc39a10	-0.192943	1	0.203461	90.3196	100.136	91.3497	80.3901	93.34	81.3309	19.4385	20.0798	19.6344	20.6446	20.5314	19.9448	93.9349	6.55359	85.0203	6.40974	19.7175	4.30141	20.3736	4.34863	-0.143854	0.0472212
Uqcr10	0.291055	1	0.203502	120.799	136.364	151.961	150.754	169.365	179.584	73.1573	78.3343	86.4223	86.2079	81.8395	68.6324	136.375	7.09143	166.568	7.37997	79.3046	6.30933	78.8932	6.30183	0.288535	-0.00750361
Ptpn9	-0.248422	1	0.203616	35.3728	36.9531	33.9134	27.5258	28.2607	25.5562	51.0518	46.6459	45.753	45.0112	39.7352	45.5092	35.4131	5.14621	27.1143	4.76098	47.8169	5.57945	43.4186	5.44024	-0.385231	-0.139209
Cdc42bpb	-0.285059	1	0.203855	36.6312	38.5471	37.5212	32.63	34.0323	24.6928	22.3765	18.7634	20.62	22.5634	17.7733	20.3364	37.5665	5.23137	30.4517	4.92845	20.5866	4.36364	20.2243	4.33802	-0.302924	-0.0256144
Rnasel	0.216843	1	0.204065	76.1984	80.4272	83.1239	80.2078	90.1557	96.8718	28.5019	29.1375	29.9314	28.5973	25.2923	30.3702	79.9165	6.32042	89.0784	6.477	29.1902	4.86741	28.0866	4.81181	0.156583	-0.0556051
Fads3	-0.194709	1	0.204288	65.8522	69.8485	67.5382	57.4215	58.9097	50.249	20.4142	20.9392	19.6344	18.4252	19.4442	19.1464	67.7463	6.08207	55.5267	5.79511	20.3293	4.34549	19.0053	4.24833	-0.28696	-0.097157
Dync1li2	-0.154218	1	0.204429	110.313	112.308	116.316	99.8951	92.3449	104.124	48.851	47.5326	53.7935	47.4849	47.2428	51.1058	112.979	6.81991	98.7881	6.62627	50.059	5.64556	48.6111	5.60322	-0.193645	-0.0423434
Tbc1d9b	-0.238698	1	0.205109	45.2996	41.3005	52.3854	39.557	37.4156	34.3627	30.8653	30.9177	31.0207	27.765	28.2793	31.8442	46.3285	5.53383	37.1118	5.21381	30.9346	4.95115	29.2962	4.87264	-0.320022	-0.0785076
Rpl18	-0.321605	1	0.205486	72.2836	81.4416	97.1222	52.8642	76.6224	52.3212	554.578	529.413	531.01	511.398	507.277	435.316	83.6158	6.3857	60.6026	5.92131	538.333	9.07236	484.664	8.92084	-0.464396	-0.151516
Ncbp1	-0.241569	1	0.205728	365.892	357.068	355.874	340.154	319.028	341.21	61.4162	65.7981	62.8455	63.8526	70.2233	74.3824	359.611	8.49029	333.464	8.38139	63.3533	5.98535	69.4861	6.11865	-0.108908	0.133306
Ccdc85b	0.297832	1	0.206167	13.5619	13.477	19.0492	16.953	14.9264	15.5409	25.6506	24.5131	22.7468	20.7602	21.0006	19.5072	15.3627	3.94136	15.8068	3.98247	24.3035	4.60309	20.4227	4.3521	0.0411118	-0.250993
Tbc1d13	0.233795	1	0.206351	31.3182	31.4463	36.944	32.4477	35.0274	39.7157	21.8019	24.6086	23.6027	18.4252	21.8017	24.1595	33.2362	5.05468	35.7303	5.15907	23.3378	4.54459	21.4622	4.42372	0.104392	-0.120871
Samd14	0.302538	1	0.206726	16.2184	14.7812	18.3277	16.7707	15.9215	20.7212	121	113.767	105.382	102.183	99.4182	98.3961	16.4424	4.03935	17.8045	4.15417	113.383	6.82506	99.999	6.64384	0.114819	-0.181222
Btf3l4	2.01149	1	0.207018	0.139814	0	0.144312	0.364581	0.398038	0.345354	12.5759	11.3426	10.4008	10.3339	11.0096	10.7862	0.0947086	-3.40036	0.369324	-1.43704	11.4398	3.51599	10.7099	3.42087	1.96332	-0.0951173
Slc4a1ap	-0.22287	1	0.207252	107.936	127.09	107.224	107.369	108.067	111.895	17.8123	20.2912	21.6575	20.8989	22.3053	23.2843	114.083	6.83394	109.11	6.76964	19.9203	4.31617	22.1628	4.47007	-0.0642979	0.153901
Urgcp	0.208153	1	0.207303	37.7497	39.1268	34.635	40.6508	44.1823	42.6512	17.9749	17.9927	16.3404	16.5064	17.7847	17.4498	37.1705	5.21608	42.4948	5.40921	17.436	4.124	17.247	4.10827	0.193128	-0.0157238
Asph	-0.243399	1	0.208256	264.527	283.307	264.092	254.113	232.653	233.977	60.0285	56.3721	56.1019	60.8241	56.1466	64.126	270.642	8.08024	240.248	7.90838	57.5008	5.84551	60.3656	5.91565	-0.171861	0.0701435
Stim1	-0.208952	1	0.208329	72.1438	54.4876	62.1986	51.9528	53.3371	48.6949	31.9169	28.2986	27.9602	30.0999	26.2193	26.9463	62.9433	5.97598	51.3283	5.68168	29.3919	4.87735	27.7552	4.79468	-0.2943	-0.0826607
Elof1	0.222384	1	0.208407	52.8495	58.2554	61.0441	55.234	64.2832	54.2206	28.6862	32.1181	26.4558	23.9274	26.1392	25.3494	57.383	5.84255	57.9126	5.85581	29.0867	4.86229	25.1387	4.65184	0.0132534	-0.210451
Slc20a2	-0.285113	1	0.208407	15.9387	14.2016	12.8438	12.0312	13.1353	7.94315	15.2429	12.5703	11.127	14.0096	11.7077	10.4714	14.328	3.84077	11.0365	3.46421	12.9801	3.69823	12.0629	3.59251	-0.376555	-0.105719
Gsk3a	-0.232879	1	0.208424	76.0586	78.3984	75.0424	59.609	69.2587	54.7386	69.1569	75.6879	75.7362	70.2563	67.9917	68.3176	76.4998	6.25738	61.2021	5.93551	73.527	6.2002	68.8552	6.10549	-0.321875	-0.0947089
Col4a3bp	-0.201695	1	0.208468	74.241	69.2689	68.1154	70.7287	61.895	56.9834	28.014	23.8652	26.9486	28.5279	25.7043	26.4396	70.5418	6.14041	63.2024	5.98191	26.2759	4.71567	26.8906	4.74903	-0.158499	0.0333594
Fbxl19	0.299482	1	0.208522	13.0027	8.11518	12.6995	13.4895	11.3441	11.3967	35.6138	29.7445	29.257	29.7532	26.6656	25.7794	11.2724	3.49473	12.0768	3.59416	31.5384	4.97904	27.3994	4.77607	0.0994329	-0.202968
Lin28b	-0.296415	1	0.208529	14.5406	9.70923	12.1222	13.4895	9.55292	7.25244	26.1927	21.7986	20.7497	26.4935	22.065	21.3421	12.124	3.5998	10.0983	3.33604	22.9136	4.51813	23.3002	4.54227	-0.263759	0.0241347
Dag1	-0.270579	1	0.208676	55.3662	48.6911	56.1375	50.6767	44.9783	36.0895	18.7663	19.1113	18.7784	20.0204	16.7891	19.3844	53.3982	5.73872	43.9149	5.45664	18.8853	4.2392	18.7313	4.22738	-0.282083	-0.0118172
Rps11	-0.26246	1	0.208676	552.264	555.165	641.613	502.392	476.253	375.918	413.369	438.208	425.316	390.421	405.627	387.013	583.014	9.18739	451.521	8.81865	425.631	8.73346	394.353	8.62335	-0.368737	-0.110115
Dnaja3	-0.204371	1	0.209102	102.344	99.5559	112.419	85.8588	101.102	88.4107	32.0903	34.3484	35.3003	32.8048	33.9214	35.7748	104.773	6.71112	91.7904	6.52027	33.913	5.08377	34.167	5.09453	-0.190851	0.0107639
Tsfm	-0.249437	1	0.209137	91.0186	86.0789	100.586	77.1088	83.9861	65.6173	18.1701	20.0661	17.9744	17.7548	18.1853	18.4555	92.5611	6.53233	75.5707	6.23976	18.7369	4.22781	18.1319	4.18046	-0.292578	-0.0473525
Rcl1	-0.152436	1	0.209318	134.501	121.003	120.934	114.661	113.441	95.1451	46.054	43.6244	43.704	44.2483	42.7337	39.8129	125.479	6.9713	107.749	6.75153	44.4608	5.47446	42.265	5.40139	-0.219775	-0.073071
Tmem223	0.309334	1	0.209318	41.1052	29.8523	39.1086	41.0153	33.4352	35.5715	23.0595	23.8652	19.375	17.3849	18.3455	17.7569	36.6887	5.19726	36.674	5.19669	22.0999	4.46597	17.8291	4.15616	-0.000577645	-0.309806
Pip4k2a	-0.237186	1	0.209592	60.9587	59.4147	63.4974	45.3903	59.3077	47.3135	53.5453	52.2865	51.8741	51.6924	48.8565	52.6949	61.2903	5.93759	50.6705	5.66307	52.5687	5.71613	51.0813	5.67472	-0.274512	-0.0414093
Pak2	-0.244551	1	0.209828	194.76	211.864	183.421	178.098	186.481	154.028	50.7374	46.5027	47.8798	51.9236	49.8636	49.0176	196.682	7.61972	172.869	7.43353	48.3733	5.59614	50.2683	5.65158	-0.186185	0.0554363
Nadk	-0.210477	1	0.209885	46.5579	49.1258	51.9524	36.8227	38.6097	41.7878	50.1737	52.9959	50.4217	46.6526	45.8695	49.056	49.2121	5.62094	39.0734	5.28812	51.1971	5.67799	47.1927	5.56049	-0.332825	-0.117498
Fam188a	0.245051	1	0.209891	60.6791	76.9493	75.331	64.8954	87.9665	82.885	26.2143	29.8946	24.6921	22.6559	26.082	27.0384	70.9865	6.14947	78.5823	6.29613	26.9337	4.75134	25.2587	4.65871	0.14666	-0.0926281
Sox6	0.233353	1	0.209954	24.3276	21.7371	20.9253	27.5258	27.8627	23.1387	11.7412	11.6632	11.957	11.929	11.1011	11.9608	22.33	4.48091	26.1758	4.71016	11.7871	3.55914	11.6636	3.54395	0.229249	-0.0151923
Atp8a1	-0.22939	1	0.210093	116.185	120.134	104.482	114.478	98.9125	109.995	21.1731	20.1412	21.5537	24.644	20.8404	24.3898	113.6	6.82782	107.795	6.75215	20.956	4.38929	23.2914	4.54173	-0.0756708	0.152435
Atxn2	-0.219508	1	0.210157	32.1571	32.6056	28.2852	31.9008	29.2558	27.9737	15.5139	13.7503	14.7841	16.622	15.4157	16.7282	31.016	4.95494	29.7101	4.89288	14.6828	3.87605	16.2553	4.02284	-0.0620583	0.146785
Ddost	-0.245627	1	0.210157	444.048	408.947	469.881	398.851	371.171	337.066	93.7884	100.187	100.325	97.9751	98.8231	95.1103	440.959	8.7845	369.029	8.52759	98.1001	6.61618	97.3028	6.60441	-0.256908	-0.0117733
Dmxl1	-0.259832	1	0.210215	62.4967	76.8044	62.1986	62.7079	65.0793	58.1922	15.991	15.0803	17.0666	17.5699	16.7662	18.6397	67.1666	6.06967	61.9931	5.95404	16.0459	4.00414	17.6586	4.1423	-0.115635	0.138161
Rabggtb	0.267116	1	0.210251	74.5206	78.5433	78.073	87.4994	105.281	118.629	54.4452	45.9298	49.851	56.3391	55.4485	56.2647	77.0456	6.26764	103.803	6.69771	50.0753	5.64603	56.0175	5.8078	0.430066	0.161777
Actr8	-0.214991	1	0.210645	57.743	64.4867	69.8472	60.7027	60.8999	54.3933	12.9554	13.0068	14.0838	13.8247	14.4544	14.1948	64.0256	6.00058	58.6653	5.87444	13.3487	3.73863	14.158	3.82354	-0.126142	0.0849147
Agfg2	0.192612	1	0.210991	62.7763	58.6901	55.9932	60.1558	61.895	59.4009	30.0847	29.4376	27.182	26.6322	25.0749	25.9252	59.1532	5.88638	60.4839	5.91848	28.9015	4.85307	25.8774	4.69362	0.0320949	-0.159448
Orc3	-0.249994	1	0.211082	152.117	156.072	150.951	139.817	133.94	141.941	26.9407	28.6328	26.8449	25.7306	29.9731	33.1877	153.047	7.25783	138.566	7.11443	27.4728	4.77993	29.6304	4.88901	-0.143402	0.109077
Rap2c	-0.211759	1	0.211082	36.2117	36.8081	38.3871	30.2602	32.2411	32.8086	34.0526	31.6952	31.6692	34.1225	31.3808	31.2761	37.1356	5.21473	31.77	4.98959	32.4723	5.02114	32.2598	5.01167	-0.22514	-0.00947409
Cyb5r4	-0.326137	1	0.211278	10.7656	11.1584	10.8234	8.20307	11.5431	5.52567	37.446	36.8652	37.505	36.1569	35.8556	34.439	10.9158	3.44835	8.42395	3.0745	37.2721	5.22002	35.4838	5.14909	-0.373851	-0.0709328
Nt5c2	-0.134955	1	0.211444	371.624	350.257	300.314	333.045	311.863	309.437	75.2389	70.4634	66.0617	74.5332	71.6882	70.8664	340.732	8.41249	318.115	8.3134	70.588	6.14135	72.3626	6.17717	-0.0990883	0.0358216
Pdia6	-0.241862	1	0.211644	431.325	443.147	475.365	432.94	398.635	465.71	45.7829	53.1459	51.7963	50.6983	59.0764	61.8843	449.945	8.81361	432.428	8.75632	50.2417	5.65081	57.2197	5.83844	-0.057289	0.187625
Becn1	-0.202606	1	0.211724	67.53	74.7756	74.8981	58.3329	65.6763	57.8468	60.9825	62.7084	58.6178	55.0908	60.4612	60.0571	72.4012	6.17794	60.6187	5.92169	60.7695	5.92528	58.5364	5.87126	-0.256251	-0.0540154
Ltn1	-0.253095	1	0.211886	219.228	215.342	173.896	220.389	187.476	192.708	29.8462	24.7041	25.5739	32.3424	29.79	31.6523	202.822	7.66407	200.191	7.64523	26.7081	4.7392	31.2616	4.96632	-0.0188379	0.227113
Farsb	-0.132198	1	0.211951	445.027	451.697	407.105	429.476	428.488	434.283	55.9955	59.4209	59.8368	60.616	64.1234	65.2084	434.609	8.76358	430.749	8.7507	58.4177	5.86833	63.3159	5.9845	-0.0128718	0.116163
Fip1l1	-0.241972	1	0.212166	214.754	209.111	169.134	209.816	184.889	171.123	50.3255	44.9544	45.4936	55.0676	53.2283	50.3688	197.666	7.62692	188.609	7.55926	46.9245	5.55227	52.8882	5.72487	-0.0676648	0.172605
Polr1d	0.242154	1	0.212685	114.088	124.336	136.087	129.062	138.318	149.538	69.6664	77.9046	70.1598	64.6386	73.2447	67.5115	124.837	6.9639	138.973	7.11866	72.5769	6.18144	68.4649	6.09729	0.154758	-0.084146
Cdyl	-0.259901	1	0.213069	41.3848	36.9531	27.9966	35.9112	32.2411	25.0382	32.6107	27.1459	25.2108	30.0768	30.5911	27.5758	35.4448	5.1475	31.0635	4.95715	28.3225	4.82388	29.4146	4.87846	-0.190355	0.0545829
Cdk1	-0.133117	1	0.213102	407.836	434.452	440.73	370.049	391.869	376.781	47.9837	47.5599	46.972	46.9994	46.4646	45.4785	427.673	8.74036	379.567	8.56821	47.5052	5.57001	46.3142	5.53338	-0.172154	-0.0366324
Mettl9	-0.284236	1	0.213188	22.6498	29.5624	22.8013	18.229	19.9019	17.9584	42.2595	37.3631	37.6866	39.0929	34.4479	33.3873	25.0045	4.64412	18.6965	4.22469	39.1031	5.28921	35.6427	5.15553	-0.419424	-0.133675
Timm23	2.45444	1	0.213188	0	0.144914	0	0.729162	0	0.172677	19.471	22.924	24.9515	26.3317	25.9332	23.1461	0.0483046	-4.37169	0.300613	-1.73402	22.4488	4.48857	25.137	4.65174	2.63767	0.163173
Ggact	0.210808	1	0.213659	25.1664	29.8523	29.2954	26.6144	32.2411	34.0174	11.6111	13	12.0348	10.958	12.3486	11.861	28.1047	4.81274	30.9576	4.95222	12.2153	3.61062	11.7225	3.55121	0.139483	-0.0594044
Map2k5	-0.233025	1	0.213705	29.221	29.2726	35.2122	23.88	22.2901	25.0382	19.7854	20.1548	18.7525	17.015	17.7504	18.0486	31.2353	4.9651	23.7361	4.56901	19.5642	4.29015	17.6047	4.13789	-0.396092	-0.152261
Srbd1	-0.242318	1	0.213734	73.9614	67.385	60.6112	61.9787	63.2881	66.6533	12.8687	12.1065	13.2538	13.5935	13.3557	15.7839	67.3192	6.07295	63.9734	5.9994	12.743	3.67163	14.2444	3.83232	-0.0735455	0.160687
Tnfaip2	-0.136919	1	0.213941	274.035	235.92	260.339	251.196	220.911	220.854	95.7723	81.7514	79.4971	90.5772	80.077	83.3184	256.765	8.0043	230.987	7.85167	85.6736	6.42078	84.6576	6.40357	-0.152634	-0.0172119
Smim20	0.245486	1	0.214061	25.4461	23.0413	24.1002	29.1665	25.4745	22.966	12.5001	12.8227	12.1904	10.2183	11.8565	11.4694	24.1958	4.59669	25.869	4.69315	12.5044	3.64436	11.1814	3.48303	0.0964642	-0.161335
Napg	-0.237093	1	0.214694	38.5885	39.5615	37.0883	39.557	32.6391	33.154	14.2889	13.9685	13.5651	14.657	14.0653	16.2906	38.4128	5.26351	35.1167	5.13409	13.9408	3.80124	15.0043	3.9073	-0.129428	0.106056
2009-09-01	-0.186633	1	0.214799	68.9281	62.1681	77.64	53.958	54.1332	62.8545	42.0969	41.8101	49.1248	38.7924	38.236	47.1061	69.5787	6.12057	56.9819	5.83243	44.3439	5.47067	41.3782	5.3708	-0.288143	-0.0998678
Pcbp1	0.255506	1	0.215151	426.991	363.009	430.195	434.763	459.535	530.982	134.465	124.666	127.922	135.658	127.766	115.761	406.732	8.66793	475.093	8.89207	129.018	7.01143	126.395	6.9818	0.224133	-0.0296282
Crnkl1	-0.146641	1	0.215341	169.874	173.027	156.867	162.421	169.763	161.626	26.9407	26.2797	28.0898	29.0134	29.5954	29.8098	166.589	7.38015	164.603	7.36285	27.1034	4.7604	29.4729	4.88132	-0.0173036	0.120913
Frrs1	-0.207937	1	0.215356	140.093	124.771	123.531	128.697	114.436	97.5625	24.4472	20.1548	19.2712	23.3725	20.0965	20.774	129.465	7.01642	113.565	6.82738	21.2911	4.41218	21.4143	4.4205	-0.189043	0.00832738
Rfc4	-0.248228	1	0.215435	299.481	296.929	240.713	271.613	234.047	246.237	35.5054	33.6118	33.381	36.18	36.5995	36.4581	279.041	8.12433	250.632	7.96943	34.1661	5.09449	36.4125	5.18636	-0.154904	0.0918707
Sertad2	0.331461	1	0.215435	10.2064	9.85415	8.94736	8.38536	13.3343	11.742	12.4242	12.809	14.6026	12.6457	11.1698	12.4674	9.6693	3.27341	11.1539	3.47948	13.2786	3.73103	12.0943	3.59626	0.206064	-0.134774
Polr2a	-0.260892	1	0.215501	154.494	133.9	121.367	216.926	144.09	177.339	40.5683	33.871	32.5251	60.0612	49.0625	58.0074	136.587	7.09368	179.452	7.48745	35.6548	5.15602	55.7104	5.79987	0.393774	0.64385
Luc7l	-0.219791	1	0.21561	87.1039	97.3822	88.8964	84.5827	84.5832	87.5473	46.9647	41.9193	39.2947	46.7451	47.4946	46.0697	91.1275	6.50981	85.5711	6.41905	42.7262	5.41705	46.7698	5.5475	-0.0907631	0.130456
Abhd17a	-0.346665	1	0.215626	13.8415	14.3465	16.7402	7.83849	12.9362	9.15188	74.3173	71.2818	72.8572	66.4418	62.5098	55.0825	14.9761	3.90459	9.97554	3.31839	72.8188	6.18624	61.3447	5.93887	-0.586194	-0.247373
4930579G24Rik	-0.352888	1	0.21565	18.8748	16.81	27.4193	13.6718	18.3098	16.9224	11.3942	12.052	12.8388	12.9	11.3644	11.861	21.0347	4.3947	16.3013	4.02692	12.095	3.59634	12.0418	3.58998	-0.367786	-0.00636537
Smc5	-0.238364	1	0.215679	151.278	132.741	119.924	157.681	135.134	123.291	27.8514	21.8736	23.1877	31.0709	27.1578	29.6486	134.648	7.07305	138.702	7.11585	24.3042	4.60314	29.2924	4.87245	0.0428016	0.269319
Fbxw5	0.223445	1	0.215833	34.1145	33.62	35.6451	37.3695	33.4352	36.6075	47.1381	43.6108	39.165	42.1908	38.0758	35.8439	34.4599	5.10685	35.8041	5.16205	43.3046	5.43645	38.7035	5.27439	0.0552064	-0.162057
Ndufa3	-0.238877	1	0.215972	119.121	132.596	143.446	111.197	122.596	117.593	20.2841	27.4528	26.6374	20.8295	28.8286	28.474	131.721	7.04134	117.129	6.87195	24.7914	4.63177	26.0441	4.70288	-0.169394	0.0711119
Cdk8	-0.260575	1	0.216043	23.6285	22.4617	23.3786	15.677	21.096	20.0305	36.1667	37.67	34.5482	33.7526	34.9514	37.4023	23.1562	4.53333	18.9345	4.24295	36.1283	5.17506	35.3688	5.14441	-0.290383	-0.0306522
Ak2	-0.13317	1	0.21616	273.615	293.306	300.458	261.951	272.656	252.109	108.359	113.065	110.258	107.823	111.572	110.541	289.126	8.17556	262.239	8.03474	110.561	6.7887	109.979	6.78108	-0.14082	-0.00761238
Sec13	0.145349	1	0.216567	167.217	146.218	159.321	175.546	172.351	173.713	29.521	28.9738	29.0755	30.1231	29.0919	28.2667	157.585	7.29999	173.87	7.44186	29.1901	4.86741	29.1605	4.86595	0.141874	-0.00145999
Vars	-0.233688	1	0.216659	669.288	604.871	618.811	620.334	578.748	507.325	140.341	131.978	133.783	139.865	139.897	149.602	630.99	9.30147	568.802	9.15178	135.368	7.08074	143.121	7.1611	-0.149689	0.080358
Wdr36	-0.136221	1	0.217462	318.635	319.1	282.419	307.706	322.013	304.948	47.9295	46.1139	46.4274	52.4784	50.5503	53.478	306.718	8.26077	311.556	8.28335	46.8236	5.54916	52.1689	5.70512	0.0225757	0.155954
Sla	-0.247414	1	0.217559	19.9933	24.9252	30.4499	13.6718	19.5039	27.283	10.3752	13.4434	13.8763	9.77901	12.2456	14.356	25.1228	4.65093	20.1529	4.33291	12.5649	3.65133	12.1269	3.60013	-0.318012	-0.0511981
Ankrd17	-0.243829	1	0.218258	300.04	314.028	252.979	314.269	273.452	260.57	62.0233	55.4376	55.7388	70.1638	63.3109	66.621	289.016	8.17501	282.764	8.14345	57.7332	5.85133	66.6986	6.05958	-0.031553	0.208254
Snx15	0.287891	1	0.218258	18.4554	17.0998	21.7912	17.8645	24.8774	21.0666	16.0452	18.6816	15.8216	13.2699	16.1825	16.5746	19.1155	4.25667	21.2695	4.41071	16.8494	4.07463	15.3423	3.93945	0.154045	-0.135183
Stk38	-0.215093	1	0.21843	65.1531	72.6019	63.0645	61.9787	53.1381	62.6818	20.089	21.3689	21.9946	21.5	21.4355	22.3094	66.9398	6.06479	59.2662	5.88914	21.1508	4.40264	21.7483	4.44283	-0.175655	0.0401867
Arhgap10	-0.229062	1	0.218441	22.0905	24.3455	25.399	21.8748	22.4892	19.8579	10.4077	9.89666	10.9195	10.9812	10.6777	10.8476	23.945	4.58165	21.4073	4.42003	10.4079	3.37961	10.8355	3.43769	-0.161623	0.0580784
Tmem69	0.216082	1	0.218474	68.6485	70.2833	60.1782	75.1036	77.8165	82.7123	20.6094	21.1983	19.8159	20.4596	20.2453	22.1405	66.37	6.05246	78.5442	6.29543	20.5412	4.36045	20.9485	4.38877	0.242973	0.0283228
4931406P16Rik	0.261034	1	0.218593	18.036	16.2304	13.7097	23.1509	18.3098	14.5049	15.1887	13.0546	12.8129	14.9113	11.9824	12.8052	15.992	3.99928	18.6552	4.2215	13.6854	3.77457	13.233	3.72606	0.222226	-0.0485024
Gata1	-0.131025	1	0.21877	397.49	357.213	348.947	371.69	330.77	301.149	118.127	115.895	104.371	112.054	115.566	108.092	367.883	8.5231	334.536	8.38602	112.798	6.81759	111.904	6.80612	-0.137086	-0.0114738
Aagab	-0.200988	1	0.218864	49.7736	57.8207	58.7351	50.1299	46.7695	49.213	14.6792	16.7445	15.3029	14.7494	16.6975	16.0219	55.4431	5.79294	48.7041	5.60597	15.5755	3.96121	15.8229	3.98395	-0.186965	0.0227378
Dtwd1	-0.228038	1	0.218987	41.6644	45.2131	48.6332	36.2758	39.0078	45.5867	10.2342	11.4927	11.957	12.0215	11.9938	11.362	45.1703	5.4973	40.2901	5.33235	11.228	3.48902	11.7924	3.55979	-0.164949	0.0707639
Man1a2	-0.231844	1	0.219199	35.9321	36.8081	38.6757	30.0779	36.8186	30.0458	31.0279	29.915	28.2195	30.4467	29.2292	31.2454	37.1386	5.21485	32.3141	5.01409	29.7208	4.8934	30.3071	4.92158	-0.200758	0.0281817
Sptlc1	-0.192192	1	0.219423	71.4447	67.8197	68.2597	69.6349	58.7107	64.2359	17.4112	17.5493	16.5997	18.1016	18.2997	18.3403	69.1747	6.11217	64.1938	6.00436	17.1867	4.10322	18.2472	4.1896	-0.107811	0.0863797
Ptpn7	-0.253605	1	0.219434	116.465	113.902	112.852	96.9785	107.072	83.403	121.109	130.171	107.665	111.106	122.364	122.325	114.406	6.83802	95.8179	6.58222	119.648	6.90265	118.599	6.88994	-0.2558	-0.0127089
Ssbp2	0.200258	1	0.219434	28.2423	29.4175	27.9966	31.5362	31.8431	32.1179	15.3296	15.0121	14.2913	14.9575	14.3857	14.1564	28.5522	4.83553	31.8324	4.99242	14.8777	3.89508	14.4999	3.85797	0.156897	-0.0371107
Sri	-0.147062	1	0.220032	137.856	153.464	154.991	131.796	137.92	132.616	33.0119	32.3841	33.9257	34.1688	32.7427	32.3432	148.77	7.21694	134.111	7.06728	33.1072	5.04907	33.0849	5.0481	-0.149664	-0.000974091
Rsl1d1	-0.245358	1	0.220169	350.093	353.155	273.76	326.117	331.168	294.932	89.4193	82.3107	72.6757	91.7563	95.3898	94.6881	325.67	8.34727	317.406	8.31019	81.4686	6.34817	93.9447	6.55374	-0.03708	0.205568
Dclre1b	-0.228411	1	0.220425	31.7377	35.2141	33.3361	27.7081	30.0519	27.283	15.5898	17.106	16.885	16.9225	15.4272	16.9585	33.4293	5.06304	28.3477	4.82516	16.527	4.04675	16.4361	4.03879	-0.237883	-0.00795622
Nat10	-0.133846	1	0.22075	299.061	284.611	272.029	285.467	286.389	278.873	57.5133	53.0504	54.6235	62.9047	58.6415	58.5908	285.234	8.156	283.576	8.14759	55.0624	5.783	60.0457	5.90799	-0.00840728	0.124993
Sart3	-0.226258	1	0.220888	113.529	108.541	102.462	96.067	99.1116	93.9363	35.7764	30.1606	36.0525	38.723	33.7269	33.7097	108.177	6.75725	96.3716	6.59054	33.9965	5.08731	35.3865	5.14513	-0.166713	0.0578144
Lmnb2	-0.201752	1	0.221014	52.9893	50.43	55.7045	49.2184	44.5803	45.7594	21.4116	22.3578	25.2886	23.0951	22.2023	24.1595	53.0413	5.72904	46.5194	5.53976	23.0194	4.52478	23.1523	4.53308	-0.189285	0.00830733
Ostc	0.142442	1	0.221173	157.43	167.665	180.968	155.494	167.176	184.764	56.5376	63.0221	58.125	49.7736	54.6703	57.7157	168.688	7.39821	169.145	7.40211	59.2282	5.88821	54.0532	5.75631	0.00390359	-0.131905
Scaf1	0.214421	1	0.221266	49.3542	49.2707	53.1069	53.7757	58.7107	58.0195	48.58	48.9172	45.0786	43.8553	45.4918	48.9792	50.5773	5.66042	56.8353	5.82871	47.5253	5.57062	46.1088	5.52697	0.168297	-0.0436533
BC037034	-0.307311	1	0.221636	9.08788	10.4338	15.1528	8.20307	7.76175	10.5333	10.5378	12.5771	14.0579	9.87149	11.5589	14.1871	11.5582	3.53084	8.83271	3.14286	12.3909	3.63121	11.8725	3.56955	-0.387984	-0.0616613
Ilf2	-0.254213	1	0.221727	214.334	212.299	198.862	177.733	185.884	186.491	37.4893	44.3065	39.0872	35.9489	43.8324	46.9295	208.498	7.70389	183.369	7.51861	40.2943	5.3325	42.2369	5.40043	-0.185284	0.0679276
Zc3h13	-0.263014	1	0.221727	63.3356	48.4013	42.7164	66.3537	44.3813	51.9758	21.2056	17.713	20.2309	26.0542	23.2437	24.9502	51.4844	5.68606	54.2369	5.7612	19.7165	4.30133	24.7494	4.62932	0.0751396	0.327988
Atp9b	-0.232269	1	0.221815	38.0293	42.8945	50.7979	38.8279	42.5901	37.8163	14.2564	14.787	15.8735	16.1828	14.7863	16.9815	43.9072	5.45639	39.7447	5.31269	14.9723	3.90422	15.9835	3.99851	-0.143695	0.0942907
9430020K01Rik	-0.210177	1	0.221821	46.1385	46.5174	42.7164	37.9164	40.7989	36.7802	19.6445	19.6637	20.6718	18.2865	19.593	20.9045	45.1241	5.49583	38.4985	5.26673	19.9934	4.32145	19.5946	4.29239	-0.229095	-0.0290609
Ppwd1	-0.234393	1	0.2222	91.8575	90.5712	78.5059	95.7024	91.3498	98.4259	11.0907	9.9444	12.346	15.0037	13.3328	14.2715	86.9782	6.44258	95.1594	6.57227	11.127	3.476	14.2027	3.82809	0.129692	0.352095
Dars	-0.233142	1	0.222262	374.7	426.482	366.409	357.836	373.36	352.952	70.8806	67.3736	71.301	75.2961	76.0715	77.4072	389.197	8.60436	361.383	8.49738	69.8518	6.12622	76.2582	6.25282	-0.106973	0.126597
Guf1	-0.260134	1	0.222262	44.4607	56.9512	45.8913	49.583	45.9734	39.543	18.4303	18.0404	17.2741	18.957	19.3068	20.6127	49.1011	5.61768	45.0332	5.49292	17.9149	4.16309	19.6255	4.29466	-0.124767	0.131568
Tm9sf4	-0.210099	1	0.222512	107.517	111.004	106.935	99.7128	95.1312	93.591	27.9273	29.6149	26.9227	27.5107	27.8559	31.2761	108.485	6.76136	96.145	6.58714	28.155	4.81532	28.8809	4.85204	-0.174217	0.0367256
Vezf1	-0.223229	1	0.222726	25.5859	27.3887	29.2954	20.7811	25.8725	28.319	19.7095	21.3279	20.9572	20.529	21.6415	24.1288	27.4233	4.77733	24.9909	4.64333	20.6649	4.36911	22.0998	4.46596	-0.134003	0.0968504
Taf15	-0.278074	1	0.222991	104.301	92.8898	94.0916	95.3379	91.7478	97.7352	21.8128	19.6501	28.9976	30.1231	24.4912	28.1899	97.0941	6.60131	94.9403	6.56895	23.4868	4.55378	27.6014	4.78667	-0.0323632	0.232889
Smarcc1	-0.241213	1	0.223069	342.403	314.898	282.131	334.503	300.519	285.435	57.6434	54.3122	56.4909	66.1181	60.0492	68.6631	313.144	8.29068	306.819	8.26124	56.1488	5.81118	64.9435	6.02111	-0.0294383	0.209928
Slmap	-0.252883	1	0.223791	32.8562	36.6632	37.0883	30.2602	29.4548	23.4841	69.6772	60.519	65.7505	65.1241	55.8262	60.5024	35.5359	5.15121	27.733	4.79353	65.3156	6.02935	60.4842	5.91849	-0.357671	-0.110868
Cct5	-0.203899	1	0.223872	2343.14	2380.94	2177.53	2260.58	2100.25	2045.53	258.793	258.132	272.158	283.337	286.902	273.677	2300.53	11.1678	2135.46	11.0603	263.028	8.03907	281.305	8.13599	-0.107425	0.0969231
Med7	-0.212226	1	0.2239	31.8775	41.5903	38.3871	31.5362	37.8136	37.989	24.2846	26.6207	25.3924	24.7827	30.614	29.8635	37.285	5.22052	35.7796	5.16107	25.4326	4.6686	28.4201	4.82884	-0.0594559	0.160234
Wdr74	-0.14042	1	0.223934	183.296	184.91	197.131	175.91	168.37	173.022	58.1746	60.2871	56.1538	60.0381	60.8961	55.6889	188.445	7.558	172.434	7.4299	58.2051	5.86307	58.8744	5.87957	-0.1281	0.0164929
[truncated: 4,138 more rows]
