# Supplementary material for: Ribosome profiling uncovers selective mRNA translation associated with eIF2 phosphorylation in erythroid progenitors
Source: PLoS One. 2018 Apr 10;13(4):e0193790. doi: 10.1371/journal.pone.0193790 (PMC5892948; doi:10.1371/journal.pone.0193790)
Supplement: S5 Table — Peaks were called with the cumulative reads of each triplicate, with our previously developed peak calling algorithm to identify translation initiation sites (TIS)[26]. Peaks were divided into 5’UTR TISs, annotated start codon TISs, TISs in the CDS, or in the 3’UTR. The analysis was performed both with a setting of peaks at -12nt and at -13nt from the read start. Peaks were assigned to AUG, CUG, GUG or UUG start codons at either +12 or +13 from the start of the protected fragment. All other peaks were assigned to the codon at the +13 position counted from the top of the peak. TISs in the 5'UTR, the CDS, annotated starts were fused to gene name in random order. Positions are +13 positions, unless a atg, ctg, gtg or ttg occurs at +12, or +14. in that case the atg, ctg, gtg or ttg was preferred. (XLSX) [file pone.0193790.s013.xlsx]

## Sheet: Sheet1
Table S5
TIS: translation initiation sites detected by stalling of ribosomes in presence of harringtonin
TIS in the 5'UTR, the CDS, annotated starts were fused to gene name in random order. Positions are +13 positions, unless a atg, ctg, gtg or ttg occurs at +12, or +14.
in that case the atg, ctg, gtg or ttg was prefered
			5'UTR				annotated start				CDS
			untreated		Tm-treated		untreated		Tm-treated		untreated		Tm-treated
Gene name	FoldChange interaction 2log	fdr interaction	genome position	codon	genome position	codon	genome position	codon	genome position	codon	genome position	codon	genome position	codon
Atf4	1.95918	1.08929e-36	chr15:80255668	AUG	chr15:80255668	AUG
Atf4	1.95918	1.08929e-36	chr15:80256234	AAA	chr15:80256234	AAA
Hspa5	-0.548761	3.19749e-17			chr2:34772177	CGU	chr2:34772322	atg	chr2:34772322	atg	chr2:34774585	tct	chr2:34774585	tct
Hspa5	-0.548761	3.19749e-17	chr2:34772117	UUC	chr2:34772117	UUC					chr2:34775585	ctg
Scoc	1.46003	7.8301e-11									chr8:83437991	atg	chr8:83437991	atg
Ibtk	1.04425	1.80446e-10											chr9:85743672	aga
Hbs1l	-0.548604	4.50068e-10
Anapc1	-0.464404	1.54562e-09	chr2:128686049				chr2:128686037	atg
Tnks2	-0.553458	2.54214e-09	chr19:36834383	GAC	chr19:36834383	GAC
Pnrc2	1.04235	2.14375e-08	chr4:135873772	CUG	chr4:135873772	CUG
Pnrc2	1.04235	2.14375e-08	chr4:135873032	AUG	chr4:135873032	AUG
Pnrc2	1.04235	2.14375e-08	chr4:135873068	ACC	chr4:135873068	ACC
Ddit3	1.55377	2.3e-08
Ost4	0.793275	8.12211e-08	chr5:30907611	CUG	chr5:30907676	GUG					chr5:30907529	tcg	chr5:30907529	tcg
Usmg5	1.512	1.1844e-07	chr19:47090576		chr19:47090575		chr19:47090564	atg	chr19:47090563	atg
Cep192	-0.478887	1.28926e-07	chr18:67800134	CUG	chr18:67800134	CUG
Rbm17	-0.490871	1.37e-07									chr2:11598105	aga	chr2:11598105	aga
Gtf2h5	0.614405	1.63507e-07	chr17:6079872	CUG	chr17:6079872	CUG
Efr3a	-0.651326	1.8421e-07
Ifrd1	0.845688	3.00147e-07	chr12:40223161	UCC	chr12:40223006	CUG
Sepw1	0.883768	3.11117e-07									chr7:15922278	cga	chr7:15922278	cga
Sepw1	0.883768	3.11117e-07									chr7:15919943	tgg	chr7:15919943	tgg
Sepw1	0.883768	3.11117e-07									chr7:15922260	gct
Hsd17b12	-0.427604	3.22168e-07
Csde1	-0.834189	3.99e-07	chr3:103020658	AUG	chr3:103020658	AUG					chr3:103038697	ctt	chr3:103038697	ctt
Csde1	-0.834189	3.99e-07			chr3:103028960	CUG
Csde1	-0.834189	3.99e-07			chr3:103020662	AGU
Csde1	-0.834189	3.99e-07	chr3:103028838	AGG	chr3:103028838	AGG
Csde1	-0.834189	3.99e-07	chr3:103029140	CUG	chr3:103029140	CUG
Csde1	-0.834189	3.99e-07	chr3:103020636	AGG	chr3:103020636	AGG
Csde1	-0.834189	3.99e-07	chr3:103029027	UUU
Mllt1	-0.696423	6.17523e-07
Cul3	-0.431534	6.4e-07	chr1:80340324				chr1:80340312	atg
Wac	-0.75154	6.42561e-07
Cenpa	0.670355	8.10422e-07									chr5:30672562	gag	chr5:30672562	gag
Ctbp2	-0.595375	9.33753e-07
Med24	1.71989	1.49521e-06	chr11:98729401	UAC	chr11:98729401	UAC					chr11:98728906	cag	chr11:98728906	cag
Ttc13	-0.581544	1.65669e-06
Gtf2h1	-0.428195	2.218e-06									chr7:46801701	ctg	chr7:46801701	ctg
Calr	-0.324806	2.65294e-06	chr8:84846845	AAA	chr8:84846845	AAA					chr8:84844628	gaa	chr8:84844628	gaa
Atp6v1c1	-0.55904	2.6903e-06	chr15:38672876		chr15:38672876		chr15:38672888	atg	chr15:38672888	atg
Cacybp	-0.391037	2.6903e-06	chr1:160212735	CUG	chr1:160212735	CUG					chr1:160203657	gat	chr1:160203657	gat
Cela1	1.02719	3.44118e-06									chr15:100687149	tgg	chr15:100687149	tgg
Cela1	1.02719	3.44118e-06									chr15:100685218	atg	chr15:100685218	atg
Cela1	1.02719	3.44118e-06									chr15:100687193	ctg	chr15:100687190	acg
Tcp1	-0.31473	3.66928e-06	chr17:12916554		chr17:12916554		chr17:12916566	atg	chr17:12916566	atg	chr17:12916584	gca	chr17:12918142	atg
Map4k4	-0.749675	3.6885e-06
Fut8	-0.419799	5.73009e-06	chr12:77331898	AAG	chr12:77331898	AAG
Myo18a	-0.681366	6.33105e-06
Riok2	-0.367767	9.60646e-06											chr17:17374644	gag
Nup210	-0.725942	1.07395e-05									chr6:91021421	cta	chr6:91116659	ctg
Atp6v1f	1.24113	1.09861e-05									chr6:29467831	gtg	chr6:29467831	gtg
Dph3	0.782547	1.18986e-05									chr14:32084975	aag	chr14:32085481	agg
Mrps14	0.362514	1.30555e-05
Dym	-0.58035	1.4417e-05	chr18:75043080	AUG	chr18:75043080	AUG
Dym	-0.58035	1.4417e-05	chr18:75018863	AUG	chr18:75018863	CAU
N4bp2l1	0.721479	1.55493e-05	chr5:150594485	AGG	chr5:150594485	AGG					chr5:150594421	gga
Nsmaf	-0.495236	1.65953e-05
Spcs1	0.677229	1.74091e-05											chr14:31001269	tcg
Spcs1	0.677229	1.74091e-05											chr14:31001243	acc
Faf1	-0.657214	1.81241e-05
Tmub2	0.555538	2.04166e-05	chr11:102285019	AAG									chr11:102287321	tgg
Trim37	-0.562766	2.30347e-05	chr11:87127110	GUG	chr11:87127111	GUG
Sqle	-0.327907	2.37741e-05	chr15:59315582	UUU	chr15:59315582	UUU
Sqle	-0.327907	2.37741e-05	chr15:59315528	AUG	chr15:59315528	AUG
Ccdc137	0.678908	2.46196e-05
Son	0.345087	2.69729e-05									chr16:91657720	gct	chr16:91657720	gct
Son	0.345087	2.69729e-05									chr16:91657216	ccg	chr16:91657216	ccg
Son	0.345087	2.69729e-05									chr16:91657945	gga
Son	0.345087	2.69729e-05									chr16:91659340	gat
Cct6a	-0.293319	2.74611e-05									chr5:129787439	aga	chr5:129787439	aga
Cct6a	-0.293319	2.74611e-05									chr5:129845611	gtt	chr5:129793690	cat
Cct6a	-0.293319	2.74611e-05									chr5:129789939	act	chr5:129789918	gtg
Cct6a	-0.293319	2.74611e-05											chr5:129789161	tgt
Cct6a	-0.293319	2.74611e-05											chr5:129788243	atc
Vps35	-0.336664	2.82632e-05									chr8:85294934	aaa
Hspa8	-0.386775	3.01298e-05	chr9:40801305	CGU	chr9:40801305	CGU			chr9:40801354	atg	chr9:40802885	gct	chr9:40804683	act
Mapkapk5	-0.688665	3.05111e-05
Herpud1	-0.701846	3.09764e-05	chr8:94386506	GUG	chr8:94386580		chr8:94386592	atg	chr8:94386592	atg
Smek2	-0.648812	3.21741e-05	chr11:29172981	AUG	chr11:29172981	AUG
Ccnk	-0.537025	3.32591e-05
1110008F13Rik	0.386448	3.60527e-05	chr2:156863195	CUG	chr2:156863195	CUG					chr2:156863411	ttt	chr2:156863304	ggc
Tmem258	0.616889	3.6346e-05	chr19:10204249		chr19:10204249		chr19:10204261	atg	chr19:10204261	atg
Tsc22d2	-0.651128	3.68761e-05
Psmd6	-0.319344	3.95917e-05											chr14:14119999	gaa
Psmd6	-0.319344	3.95917e-05									chr14:14120860	aag	chr14:14120860	aag
Spire1	-0.629335	4.13396e-05
Kit	-0.308677	4.56694e-05									chr5:75575060	tgg	chr5:75575060	tgg
Kit	-0.308677	4.56694e-05									chr5:75654527	gcc	chr5:75654527	gcc
Kit	-0.308677	4.56694e-05									chr5:75607140	atg	chr5:75607140	atg
Kit	-0.308677	4.56694e-05									chr5:75654528	cct
Kit	-0.308677	4.56694e-05									chr5:75648401	ctg
Kit	-0.308677	4.56694e-05									chr5:75645972	tgt
Kit	-0.308677	4.56694e-05									chr5:75652776	tcc
Nckap1	-0.635406	4.67298e-05
Pbk	-0.403444	4.79413e-05	chr14:65806119	GUG	chr14:65809222		chr14:65809234	atg	chr14:65809234	atg
Hnrnpl	-0.301736	4.88896e-05									chr7:28818852	tct
Hnrnpl	-0.301736	4.88896e-05									chr7:28815303	act
Ptk2	-0.522025	4.89427e-05
Tmem128	0.518284	5.60349e-05									chr5:38260402	ggg	chr5:38260402	ggg
Mzt1	0.64034	5.87832e-05									chr14:99046022	agg
Mzt1	0.64034	5.87832e-05									chr14:99040632	atg	chr14:99040632	atg
Map2k4	-0.375653	5.98872e-05			chr11:65788257				chr11:65788245	atg
Tmem167b	0.636158	6.07731e-05											chr3:108562280	act
Coa5	0.776364	6.283e-05
Ddx23	-0.341118	6.32935e-05											chr15:98651506	aca
Ddx23	-0.341118	6.32935e-05									chr15:98656632	gga	chr15:98656632	gga
Ddx23	-0.341118	6.32935e-05									chr15:98658427	aaa	chr15:98658426	aaa
Ddx23	-0.341118	6.32935e-05											chr15:98658382	cgg
Mplkip	0.98893	6.32935e-05	chr13:17695475		chr13:17695317	AUC	chr13:17695487	atg
Pip4k2b	-0.54422	7.1087e-05	chr11:97744617		chr11:97744617		chr11:97744605	atg	chr11:97744605	atg
Tcf12	-0.590679	7.71769e-05
Lamtor1	0.983424	8.59008e-05									chr7:101905999	ata	chr7:101905999	ata
Lamtor1	0.983424	8.59008e-05									chr7:101906025	cag	chr7:101906025	cag
Hk1	0.292603	8.62791e-05									chr10:62271685	gga	chr10:62271685	gga
Usp10	-0.356365	8.72692e-05	chr8:119910848	ACG							chr8:119936561	atg	chr8:119936561	atg
Klf3	-0.523286	9.34637e-05	chr5:64803786	AUC	chr5:64803786	AUC	chr5:64816774	atg	chr5:64816773	atg
Bag5	-0.465278	9.52905e-05	chr12:111713103	CGC	chr12:111713103	CGC
Rps25	0.649781	9.55966e-05									chr9:44407990	aag	chr9:44407990	aag
Mia3	-0.467195	9.82621e-05
Cinp	0.596769	0.000100867									chr12:110879769	aag	chr12:110879769	aag
Cinp	0.596769	0.000100867									chr12:110883984	act	chr12:110883983	ctt
Lama5	-0.888189	0.000106659
Lsm3	0.667355	0.000108289									chr6:91517078	ggc	chr6:91517078	ggc
A430005L14Rik	0.57569	0.00011328
Rock1	-0.557268	0.000115749	chr18:10181329		chr18:10181329		chr18:10181317	atg	chr18:10181317	atg
Rabif	0.517128	0.000120954
Hyou1	-0.602259	0.000131193									chr9:44391014	cct	chr9:44391014	cct
Hyou1	-0.602259	0.000131193									chr9:44391014	cct	chr9:44391033	tat
N4bp1	-0.600327	0.000139079
Atg9b	0.666721	0.000145121									chr5:24387768	acg	chr5:24387768	acg
Aak1	-0.846414	0.000145903
Podxl	-0.534681	0.000147858	chr6:31563838	CUG	chr6:31563840	GCU					chr6:31524700	tgg	chr6:31524700	tgg
Podxl	-0.534681	0.000147858	chr6:31563711	CUG	chr6:31563711	CUG					chr6:31525018	tgc	chr6:31523103	agt
Enah	-0.575668	0.000149007
Scaf11	-0.336775	0.000154038	chr15:96460658	ACC	chr15:96460658	ACC							chr15:96446523	ggt
Scaf11	-0.336775	0.000154038			chr15:96460677	UAG
Sft2d2	0.69146	0.000157154
Iffo1	0.53013	0.000158379									chr6:125153046	agg	chr6:125153046	agg
Romo1	0.799427	0.000158612
Elp2	-0.328978	0.000183891									chr18:24604004	tgt	chr18:24604004	tgt
Papola	-0.607345	0.000184199	chr12:105784780	CUG	chr12:105784780	CUG					chr12:105800719	aga	chr12:105800720	gaa
Papola	-0.607345	0.000184199	chr12:105784733	GGG	chr12:105784733	GGG
Fam126a	-0.353755	0.000195671	chr5:24030625	CGC	chr5:24030625	CGC
Ctps	-0.344405	0.000199902			chr4:120570187	ACG
Atp2b1	-0.55877	0.000209059	chr10:98915362	UAU	chr10:98915362	UAU							chr10:98968946	aag
Clca3a1	-0.456637	0.000215892
Krit1	-0.538907	0.000228644	chr5:3803377	AAA	chr5:3803377	AAA
Itpa	0.821386	0.000238692
Lin54	-0.503301	0.000239351			chr5:100500628	AUG
Pkp4	-0.63244	0.000245987
Mpp6	-0.505117	0.00025804	chr6:50110393	CGC
Mpp6	-0.505117	0.00025804	chr6:50110275	CUG	chr6:50110275	CUG
Pds5a	-0.59145	0.000263562									chr5:65623099	ttt
Gsr	-0.342606	0.000265151
Ppm1a	-0.547629	0.000272317	chr12:72761456	AUG	chr12:72761456	AUG
Mon2	-0.509812	0.000277702
Atp6v0e	0.57498	0.000286378											chr17:26676510	tgg
Atp6v0e	0.57498	0.000286378									chr17:26676490	tga	chr17:26676490	tga
Nedd8	0.690372	0.000287322	chr14:55672003	ACG	chr14:55672000	AGG					chr14:55662625	aca	chr14:55662625	aca
Nek7	-0.511276	0.000308448			chr1:138561771				chr1:138561759	atg
Wdr61	-0.317283	0.000322522	chr9:54734484	AGU	chr9:54734484	AGU
Nrgn	0.845449	0.000333208									chr9:37546154	ctt	chr9:37546154	ctt
Kat2a	-0.446052	0.000337101
Hax1	0.97121	0.000362778	chr3:89998685	CUG	chr3:89998685	CUG
Metap2	-0.288289	0.00036397									chr10:93862450	atg	chr10:93889634	ggg
Metap2	-0.288289	0.00036397									chr10:93870139	cat	chr10:93870142	aca
Metap2	-0.288289	0.00036397									chr10:93887100	ctt	chr10:93887100	ctt
Bmi1	-0.67179	0.00037047
Stxbp5	-0.476504	0.000374473	chr10:9901047	CGG	chr10:9901047	CGG
Polr3k	0.615433	0.000375525
Rpl41	0.881006	0.000392306									chr10:128548678	atg	chr10:128548678	atg
Acad9	-0.427549	0.000401949									chr3:36066114	ctc	chr3:36066114	ctc
Memo1	-0.328228	0.000425242
Notch2	-0.563625	0.000425993	chr3:98013648	GCU	chr3:98013648	GCU					chr3:98137617	tct	chr3:98137617	tct
Sbds	-0.338744	0.000438986			chr5:130255364	CUG					chr5:130255319	gac	chr5:130255319	gac
Tmcc2	0.323971	0.000440877
Rplp1	0.660388	0.000446829									chr9:61914423	ctc	chr9:61914423	ctc
Tceb2	0.741408	0.000446829	chr17:23829097		chr17:23829097		chr17:23829085	atg	chr17:23829085	atg	chr17:23828915	tga
Ypel3	0.510543	0.000447368
Pabpc1	-0.984901	0.000452607	chr15:36608639	UUG	chr15:36608639	UUG					chr15:36599217	act	chr15:36599217	act
Pabpc1	-0.984901	0.000452607	chr15:36608957	GUG	chr15:36608547	CUG					chr15:36600966	cga	chr15:36600966	cga
Pabpc1	-0.984901	0.000452607									chr15:36608447	gcg
Pabpc1	-0.984901	0.000452607									chr15:36600668	ggg
Pabpc1	-0.984901	0.000452607									chr15:36605525	ttt
Chd1	-0.581606	0.000453536	chr17:15705121	AUG	chr17:15705121	AUG			chr17:15707086	atg			chr17:15725410	cga
Sugt1	-0.355403	0.000454528			chr14:79587774	AAG					chr14:79587852	cgg	chr14:79597400	aaa
Nek9	-0.488096	0.000462118									chr12:85339216	tac	chr12:85339216	tac
2310045N01Rik	0.640124	0.000471808	chr8:70139723		chr8:70139723		chr8:70139735	atg	chr8:70139735	atg
Smox	0.56808	0.000484577
Mgst3	0.318244	0.000503441									chr1:167378399	atg	chr1:167378399	atg
C530008M17Rik	-0.657207	0.00050543
Bscl2	0.471013	0.000511096									chr19:8841136	ctg	chr19:8841136	ctg
Zfp592	-0.492031	0.000511618
Dpp9	-0.443526	0.00052007	chr17:56218819	GUC	chr17:56218819	GUC
Phgdh	-0.520907	0.000527082	chr3:98339902	CUG	chr3:98339902	CUG
Polr3e	-0.482906	0.000527318	chr7:120917810	CUG	chr7:120917810	CUG					chr7:120922965	tac
Crip1	0.510148	0.000530383									chr12:113153333	aag	chr12:113153333	aag
Crip1	0.510148	0.000530383									chr12:113152139	cgc	chr12:113152139	cgc
Crip1	0.510148	0.000530383									chr12:113152132	tgt	chr12:113152132	tgt
Crip1	0.510148	0.000530383									chr12:113153326	atg	chr12:113153326	atg
Senp6	-0.527693	0.000542826	chr9:80067101	CGG	chr9:80067101	CGG
Ncor1	-0.329738	0.000547304									chr11:62438396	ttc
Arfgef1	-0.552473	0.000564763
Lss	-0.284121	0.000593496									chr10:76531672	cgt	chr10:76531672	cgt
Elavl1	-0.310059	0.000595202	chr8:4325004	CUG	chr8:4325004	CUG					chr8:4311674	gaa	chr8:4311674	gaa
Gemin7	0.528263	0.00059675
Eif1	1.54356	0.000602004											chr11:100320135	ctc
Eif1	1.54356	0.000602004									chr11:100321046	gct	chr11:100321043	ctg
Polr3gl	0.757261	0.000607292
Gdi2	-0.286107	0.000644788									chr13:3538313	ctg	chr13:3538313	ctg
Etfdh	-0.527432	0.000648143			chr3:79628703	CGC
Kpnb1	-0.500635	0.00065472	chr11:97187730	UUG							chr11:97187556	cgg	chr11:97187556	cgg
Kpnb1	-0.500635	0.00065472									chr11:97165096	aca	chr11:97165096	aca
Kpnb1	-0.500635	0.00065472											chr11:97175758	gaa
Cd2ap	-0.693333	0.000662825
Kdm5c	-0.331999	0.00066521	chrX:152233377	CUG	chrX:152233262	AAA
Kdm5c	-0.331999	0.00066521	chrX:152233262	AAA	chrX:152233377	CUG
Kdm5c	-0.331999	0.00066521
Kdm5c	-0.331999	0.00066521
Cmc2	0.652846	0.000669751
Trim28	-0.262145	0.000674079	chr7:13024441	CGG	chr7:13024441	CGG	chr7:13024721	atg			chr7:13029535	cca	chr7:13029535	cca
Srp68	-0.29552	0.000689118
Tcf25	-0.303899	0.000689118									chr8:123373963	agg	chr8:123373963	agg
Hira	-0.476608	0.0006941
Srpr	0.420627	0.000708048	chr9:35211279		chr9:35211279		chr9:35211291	atg	chr9:35211291	atg			chr9:35211304	agg
Myb	-0.270076	0.000714425											chr10:21152949	cct
Atmin	-0.637757	0.000740429
Cep350	-0.54925	0.00075995	chr1:155973181	AUG	chr1:155973181	AUG
Bbs9	0.553213	0.000807862
Iqgap1	-1.32259	0.000831963	chr7:80803222	CUG	chr7:80803222	CUG
Msl2	-0.518057	0.000846051	chr9:101075267		chr9:101075267		chr9:101075279	atg	chr9:101075279	atg
Rps18	-0.655384	0.000849011	chr17:33955632		chr17:33955632		chr17:33955620	atg	chr17:33955620	atg
Tjp1	-0.449873	0.000852769
Add3	-0.304698	0.000868803	chr19:53216808		chr19:53216808		chr19:53216820	atg	chr19:53216820	atg
Tex261	0.498391	0.000918747
Papd4	-0.551319	0.000923886			chr13:93192128	CGG
Papd4	-0.551319	0.000923886	chr13:93192103	GAA	chr13:93192103	GAA
Socs7	-1.0392	0.000923886
Txnrd1	-0.289967	0.000951451	chr10:82860358	AUG	chr10:82860358	AUG
Usp47	-0.521043	0.000982351			chr7:112023611	GCC					chr7:112023734	ata	chr7:112023734	ata
Bag4	-0.456672	0.000985258
Mospd3	0.653492	0.00100432	chr5:137600650	UCC	chr5:137600650	UCC							chr5:137599666	cgc
Mospd3	0.653492	0.00100432	chr5:137600560	CUA	chr5:137600560	CUA					chr5:137600474	gcc	chr5:137600474	gcc
Mospd3	0.653492	0.00100432	chr5:137600502	CGC	chr5:137600501	GCC					chr5:137599791	gga	chr5:137599791	gga
Uggt1	-0.537712	0.00100448									chr1:36158131	tca	chr1:36158131	tca
Uggt1	-0.537712	0.00100448									chr1:36155088	cag	chr1:36155088	cag
Uggt1	-0.537712	0.00100448									chr1:36150147	aag
Uggt1	-0.537712	0.00100448									chr1:36244095	cgg
Uggt1	-0.537712	0.00100448									chr1:36157437	gtc
Uggt1	-0.537712	0.00100448									chr1:36151792	ctg
Prr13	0.551254	0.00103669	chr15:102460116		chr15:102460116		chr15:102460128	atg	chr15:102460128	atg
Cpd	-0.484796	0.00103902											chr11:76784421	gaa
Cpd	-0.484796	0.00103902									chr11:76782241	gaa	chr11:76782282	ctg
Cpd	-0.484796	0.00103902											chr11:76846949	tgg
Cpd	-0.484796	0.00103902									chr11:76792851	tct	chr11:76792851	tct
Kmt2e	0.487106	0.00105093	chr5:23434688	CGA	chr5:23434688	CGA
Kmt2e	0.487106	0.00105093			chr5:23434541	ACU
Kmt2e	0.487106	0.00105093	chr5:23450167	AUG	chr5:23450167	AUG
Prpf8	-0.493168	0.00105799	chr11:75486898	CUG	chr11:75486898	CUG					chr11:75502537	cgc	chr11:75487097	tac
Nfatc3	-0.45339	0.00106833									chr8:106078681	atg	chr8:106078681	atg
H2afx	0.584876	0.00108805			chr9:44334720	UUG					chr9:44334767	acc
Samsn1	-0.257074	0.00112935											chr16:75870796	ctc
Samsn1	-0.257074	0.00112935									chr16:75859509	tca	chr16:75884010	tga
Eif3l	-0.265496	0.00113386
Lamp2	-0.401762	0.00114906	chrX:38456344	CGG	chrX:38456344	CGG
Psma3	0.776595	0.00117607									chr12:70978739	cgt	chr12:70978739	cgt
Psma3	0.776595	0.00117607									chr12:70974756	atg	chr12:70974756	atg
Akap9	-0.421654	0.00118457									chr5:3961738	ttg
Atp6v0b	0.514616	0.00121139											chr4:117886604	tgg
Rps5	-0.447453	0.00121802	chr7:12922339	ACG	chr7:12922339	ACG					chr7:12922991	gtg	chr7:12926425	cgg
Cenpe	-0.618384	0.0012334
Psmd13	-0.287797	0.00124096	chr7:140882460		chr7:140882460		chr7:140882472	atg	chr7:140882472	atg
Ncstn	-0.314192	0.00126782
Aplp2	-0.264332	0.00127093	chr9:31211783	CGA	chr9:31211783	CGA
Cks1b	0.587367	0.00129596
Ube4b	-0.51723	0.00134477	chr4:149426050	AUG	chr4:149426050	AUG
Ndufab1	1.06088	0.00134747			chr7:122101835				chr7:122101823	atg
Rnf146	-0.453305	0.00141111			chr10:29362018	GUG
Rnf146	-0.453305	0.00141111	chr10:29361328	AUG	chr10:29361328	AUG
Ppip5k2	-0.415625	0.00145613
Timm8b	0.521753	0.00146653									chr9:50603970	gcg	chr9:50603970	gcg
Patl1	-0.46384	0.00147691
Adam33	0.586537	0.00147958									chr2:131054494	ctg	chr2:131054494	ctg
Med1	-0.442732	0.00149549
Bola3	0.571404	0.00150308	chr6:83349432	GAC	chr6:83349432	GAC
Zfp639	-0.483107	0.00153851
Atp1a1	-0.511319	0.00158554	chr3:101604491	CUG	chr3:101604491	CUG					chr3:101595106	tat	chr3:101595106	tat
Acsl3	-0.476258	0.00159983			chr1:78657920	GUC
Ivns1abp	-0.509829	0.00160688			chr1:151344548	CGC
Ivns1abp	-0.509829	0.00160688	chr1:151344710	AUG	chr1:151344710	AUG
Rock2	-0.521971	0.00162494
Tmem14c	0.512864	0.00166546	chr13:41017124	AAA	chr13:41017124	AAA
Ranbp9	-0.440459	0.00167077
Actn4	-0.624586	0.00167925	chr7:28962242	CUG	chr7:28962242	CUG					chr7:28962183	acg	chr7:28962183	acg
Actn4	-0.624586	0.00167925	chr7:28962222	CUG	chr7:28962222	CUG
2310033P09Rik	0.564454	0.00169674	chr11:59208365	AGU	chr11:59208365	AGU
2310033P09Rik	0.564454	0.00169674	chr11:59208402	GUG	chr11:59208402	GUG
Azi2	-0.469696	0.00173081									chr9:118047438	ctg	chr9:118047438	ctg
Slc38a1	-0.298641	0.00173255	chr15:96642200	CUG	chr15:96642200	CUG	chr15:96624078	atg	chr15:96624078	atg	chr15:96624054	ctg	chr15:96624054	ctg
Fam32a	0.636706	0.00174592									chr8:72219858	aag	chr8:72219858	aag
Specc1l	-0.482895	0.00176124
Cox6c	0.751898	0.00176287									chr15:35935390	gaa	chr15:35935393	gca
Nsa2	-0.691774	0.00181903
Osbpl8	-0.389032	0.00188015	chr10:111164810	AUG	chr10:111164810	AUG
Tial1	-0.298685	0.00191537	chr7:128461517	GCA	chr7:128461517	GCA					chr7:128461145	cgg	chr7:128461145	cgg
Tial1	-0.298685	0.00191537	chr7:128461463	AGG	chr7:128461462	GGC
Dip2b	-0.470562	0.00193076
Nucb2	-0.412447	0.00193105			chr7:116509500	UAC	chr7:116509624	atg	chr7:116509624	atg
Nucb2	-0.412447	0.00193105	chr7:116509500	UAC	chr7:116504467	AGA
Scaf4	-0.477732	0.00197127									chr16:90284027	ttc
Scaf4	-0.477732	0.00197127									chr16:90229466	ccc
Ube2w	0.458687	0.00204815									chr1:16602353	aag
Vamp8	0.491536	0.00212604	chr6:72390648	CUG							chr6:72388399	tta	chr6:72388399	tta
Pink1	0.628273	0.00213101
Tango2	0.455973	0.00224029											chr16:18316706	cgt
Eef1g	-0.574512	0.00226655			chr19:8967098	CGC					chr19:8969185	ttt	chr19:8967223	cat
Eef1g	-0.574512	0.00226655									chr19:8967223	cat	chr19:8967223	cat
Atf5	0.793724	0.00227709
Max	0.487417	0.00230104	chr12:76962038		chr12:76962038		chr12:76962026	atg	chr12:76962026	atg
Erp44	-0.40285	0.00232431	chr4:48279452		chr4:48279452		chr4:48279440	atg	chr4:48279440	atg
Eef1a1	-0.498948	0.00236793									chr9:78480630	tcg	chr9:78480577	tgt
Eef1a1	-0.498948	0.00236793									chr9:78480630	tcg	chr9:78480630	tcg
Rbms1	-0.56385	0.00237024
Cry1	-0.413509	0.00239505	chr10:85184854	ACG	chr10:85184854	ACG
Cry1	-0.413509	0.00239505	chr10:85184752	GUG	chr10:85184752	GUG
Cnot4	-0.454296	0.0024093	chr6:35133695	CGU	chr6:35080146		chr6:35080135	atg	chr6:35080134	atg			chr6:35080125	agg
Scyl2	-0.440661	0.00241265
Mthfd2	-0.407542	0.00246158											chr6:83317524	ttg
B3glct	-0.413683	0.00247439
Csnk1d	-0.288943	0.00247661	chr11:120991200	AUC
Ski	-0.660559	0.00251759
Hsp90b1	-0.45808	0.00270744	chr10:86705394	GAC									chr10:86704388	aag
Hsp90b1	-0.45808	0.00270744											chr10:86693406	aag
Hsp90b1	-0.45808	0.00270744											chr10:86696779	gaa
Chchd4	0.45859	0.00270883
Ddit4	-0.509348	0.00272065	chr10:59951557	UAG	chr10:59951557	UAG
Larp1	-0.515956	0.00278143
Gemin6	-0.536132	0.00287526	chr17:80224571	GUG	chr17:80224574	UUG					chr17:80225645	aaa	chr17:80225645	aaa
Gemin6	-0.536132	0.00287526	chr17:80224547	AUG	chr17:80224548	AUG
Gemin6	-0.536132	0.00287526			chr17:80224498	AUA
Kifc1	0.743818	0.00287526
Rps27l	0.481929	0.00289809	chr9:66946132	CUG
Adam10	-0.267268	0.00291006	chr9:70679156	CGC	chr9:70679156	CGC
Hpgd	-0.387761	0.00296885									chr8:56294623	aag	chr8:56294623	aag
Mtf2	-0.447654	0.00297681	chr5:108065728	AGG	chr5:108065728	AGG
Scrib	-0.570935	0.00299209	chr15:76069702	AUG	chr15:76069702	AUG
Il1rl1	-0.243575	0.00299317									chr1:40441303	atg	chr1:40441303	atg
Il1rl1	-0.243575	0.00299317									chr1:40440755	atg	chr1:40440755	atg
Atg2b	-0.371053	0.00301326	chr12:105685139	CUG	chr12:105685139	CUG
Mtmr2	-0.525258	0.00302166
Erlec1	-0.38998	0.00326359	chr11:30954123	AGA	chr11:30954122	GAG
Prdx6	-0.258878	0.00330085
Rab4a	0.388856	0.0033535	chr8:123806104	GCG	chr8:123806104	GCG					chr8:123806150	tac	chr8:123806150	tac
Mre11a	-0.350272	0.00341123			chr9:14785463	AGG
Sac3d1	0.530006	0.00342424
Ndufa7	0.539822	0.00348621									chr17:33824645	agc
Odc1	-0.67762	0.00350408	chr12:17545136	CCG	chr12:17545089	GGG
Dnajc2	-0.478624	0.00352965
Rbmx2	0.417867	0.0035757			chrX:48695103				chrX:48695115	atg
Bsdc1	0.439336	0.00358109
Bloc1s5	0.400319	0.00361708											chr13:38612678	aga
Bloc1s5	0.400319	0.00361708											chr13:38603893	aga
1810037I17Rik	0.803144	0.00364045									chr3:122924492	cgg
Aftph	-0.413917	0.00368528			chr11:20727619				chr11:20727607	atg
Rps3a1	-0.54693	0.00369372									chr3:86141380	aat	chr3:86141380	aat
Rps3a1	-0.54693	0.00369372									chr3:86141714	acc	chr3:86141714	acc
Crtc2	-0.586892	0.00370487
Ndufb3	0.601999	0.00371414									chr1:58591097	cat	chr1:58591097	cat
Dcaf4	0.396913	0.00373119
Rpn2	-0.435462	0.00393641	chr2:157279282	CGG	chr2:157279282	CGG					chr2:157283655	atg	chr2:157283655	atg
Rpn2	-0.435462	0.00393641			chr2:157279080	CAA					chr2:157302443	atg	chr2:157314861	tct
Rpn2	-0.435462	0.00393641			chr2:157279182	UUG
Orc2	-0.459393	0.00400304	chr1:58504892	CUG	chr1:58504892	CUG
Nupl1	-0.468672	0.00401153
Atp13a3	-0.500849	0.0040147	chr16:30388535	GUG	chr16:30388535	CGU
Ppp2r5e	-0.414982	0.00402653
Iars	-0.2496	0.00402778	chr13:49682166	CUG	chr13:49682166	CUG					chr13:49687428	aaa	chr13:49687428	aaa
Aldh2	-0.27702	0.00409273			chr5:121593524	UCG
Ect2	-0.389816	0.00409522
Zfp961	0.41299	0.00413134											chr8:71965812	gct
Acyp1	0.505259	0.004137	chr12:85280324	GUG							chr12:85280054	tac
Acyp1	0.505259	0.004137	chr12:85280365	AAG	chr12:85280365	AAG
Aqr	-0.471452	0.0041891	chr2:114175215	ACG	chr2:114175215	ACG			chr2:114175167	atg	chr2:114109992	agt	chr2:114109992	agt
Aqr	-0.471452	0.0041891	chr2:114175272	CUG	chr2:114175272	CUG
Ifnar2	-0.371264	0.00419814
Vac14	-0.438175	0.00419843	chr8:110618878		chr8:110618878		chr8:110618890	atg	chr8:110618890	atg
Acbd4	0.538152	0.00425354
Chtf8	0.487461	0.00426272											chr8:106887312	acg
Chtf8	0.487461	0.00426272									chr8:106886306	cgg	chr8:106886306	cgg
Chtf8	0.487461	0.00426272									chr8:106886430	atg	chr8:106886430	atg
Rapgef1	-0.506672	0.00426272
Ascc3	-0.460043	0.00426652	chr10:50604757	AUG	chr10:50604757	AUG
Wrnip1	-0.381039	0.00434159	chr13:32802084	AUG	chr13:32802084	AUG
Rpl37a	-0.742167	0.00440616											chr1:72711798	aga
Smad4	-0.512238	0.00446928
Bckdk	-0.405894	0.00451624	chr7:127904765	CGG	chr7:127904765	CGG	chr7:127904931	atg	chr7:127904931	atg
Bckdk	-0.405894	0.00451624	chr7:127904792	AGG	chr7:127904792	AGG
Ric1	-0.430267	0.00454937
Casp3	-0.233024	0.00466679	chr8:46629737		chr8:46629737		chr8:46629749	atg	chr8:46629749	atg
Irak1	0.925315	0.0046922
Orc4	-0.40151	0.00478835	chr2:48949204	GUG	chr2:48949204	GUG							chr2:48936833	aag
Orc4	-0.40151	0.00478835	chr2:48949142	UUG
Uhrf2	-0.47857	0.00479498
Cnih4	0.396201	0.00480426									chr1:181153769	atg	chr1:181153769	atg
Nbea	-0.424936	0.00482351
Pus10	-0.46779	0.00500714	chr11:23666325	CUG	chr11:23666326	CUG					chr11:23667297	aac	chr11:23667298	aca
Topbp1	-0.452633	0.00513701									chr9:103306153	atg	chr9:103306153	atg
Coa3	0.533581	0.00514566									chr11:101278903	aga	chr11:101278903	aga
Ces2g	-0.227179	0.00514727	chr8:104961775		chr8:104961742	UAG	chr8:104961787	atg			chr8:104961813	gtt
Map3k4	-0.482795	0.00515482
Rps2	-0.510241	0.00520055									chr17:24720326	cgc	chr17:24720326	cgc
Rps2	-0.510241	0.00520055									chr17:24720729	cta
Zfp36l2	0.451202	0.00522485	chr17:84187707		chr17:84187707		chr17:84187695	atg	chr17:84187695	atg	chr17:84187123	aga
Git1	-0.56359	0.00534922
Fads1	-0.45681	0.00542148									chr19:10183155	cgt	chr19:10183155	cgt
Sf3a1	-0.254094	0.00542148	chr11:4160395	CUU	chr11:4160395	CUU							chr11:4161057	aag
Sf3a1	-0.254094	0.00542148	chr11:4160417	UUG	chr11:4160417	UUG
Sf3a1	-0.254094	0.00542148			chr11:4160460	CUG
Cad	-0.231557	0.00546578	chr5:31054859	CGG	chr5:31054859	CGG					chr5:31070429	gag	chr5:31073255	gaa
Prpf19	-0.249115	0.00584241	chr19:10895438		chr19:10895380	CUG	chr19:10895450	atg	chr19:10895450	atg
Ier5	0.43254	0.00585532	chr1:155099465	AUC							chr1:155099413	gtc	chr1:155099413	gtc
Itsn2	-0.407655	0.00589521	chr12:4593214	CGC	chr12:4593211	AGG
Cenpm	0.563961	0.00595947
Tbl1x	-0.404914	0.00601723	chrX:77633578	UAC	chrX:77633578	UAC					chrX:77641464	ttt	chrX:77641464	ttt
Tbl1x	-0.404914	0.00601723	chrX:77633612	AUG	chrX:77633612	AUG						ttt
Zzz3	-0.429003	0.00605055
Snrnp25	0.446171	0.00605461	chr11:32205528	GAG	chr11:32205528	GAG
Snrnp25	0.446171	0.00605461	chr11:32205462	CGC	chr11:32205462	CGC
Psmd5	-0.251292	0.00607076									chr2:34870908	cgg	chr2:34870908	cgg
G6pc3	0.461138	0.00612806	chr11:102189889	AGG
Trappc1	0.462334	0.00613302									chr11:69324179	atg	chr11:69324179	atg
Commd8	0.387354	0.00623405									chr5:72168130	tgg	chr5:72168130	tgg
Junb	0.386565	0.00624541	chr8:84978695	CUG
Junb	0.386565	0.00624541	chr8:84978534	CUG
Fnta	-0.298441	0.00625464									chr8:26015431	ttt	chr8:26015431	ttt
Galc	-0.400817	0.00632322
Cuta	0.273455	0.00641607			chr17:26939077				chr17:26939065	atg	chr17:26939018	atg	chr17:26939018	atg
Tmem183a	-0.549429	0.00644304	chr1:134361915	CGG	chr1:134361915	CGG
Raf1	-0.386195	0.00645474			chr6:115676481	GGA
Tmpo	-0.222807	0.00645474	chr10:91171472	CUG							chr10:91171290	aaa	chr10:91171290	aaa
Map2k1	-0.382692	0.00648396	chr9:64253546	CUG	chr9:64253546	CUG
Csnk1a1	-0.440081	0.00655234									chr18:61555760	agg	chr18:61555760	agg
Tmem201	-0.501119	0.00656801
Ankib1	-0.479479	0.00663155	chr5:3802933	CGC	chr5:3802933	CGC
Fads2	-0.435019	0.00668256	chr19:10101816	AUG	chr19:10101816	AUG	chr19:10101430	atg	chr19:10101430	atg
Fads2	-0.435019	0.00668256	chr19:10101562	AAA	chr19:10101562	AAA
Bzw1	-0.46775	0.0066867	chr1:58393214		chr1:58393214		chr1:58393226	atg	chr1:58393226	atg	chr1:58394266	aaa	chr1:58394266	aaa
Cdipt	-0.413759	0.00671747	chr7:126976458	CGG	chr7:126976458	CGG
Cdipt	-0.413759	0.00671747	chr7:126976656	AUG
Isg20l2	-0.353589	0.00681344	chr3:87931385	AUG	chr3:87931385	AUG					chr3:87931983	acc	chr3:87931983	acc
Golga4	-0.400435	0.00682859
Psma4	-0.463217	0.00693534	chr9:54950888	CUG	chr9:54950889	CUG
Mrps35	-0.42862	0.00694744
Sae1	-0.247914	0.00695954	chr7:16387762				chr7:16387750	atg
Tomm70a	-0.432462	0.00696152
1110059G10Rik	0.537228	0.00698329	chr9:122950924		chr9:122950948	UUG	chr9:122950912	atg	chr9:122950912	atg
Cct7	-0.232189	0.00699841	chr6:85452086	GGG	chr6:85452086	GGG					chr6:85459132	act	chr6:85459132	act
Ttc37	-0.372125	0.00710731	chr13:76104705	AAG	chr13:76104705	AAG
Erbb2ip	-0.384229	0.00725163	chr13:103920304	AUG	chr13:103920304	AUG
Hmgcs1	-0.203996	0.00725163	chr13:119695004	CUG	chr13:119695004	CUG					chr13:119699679	ttg	chr13:119699679	ttg
2410002F23Rik	0.716667	0.00728135
Cdc42se2	0.49375	0.00736094			chr11:54740482	AAA
Cdc42se2	0.49375	0.00736094	chr11:54756490	AGA	chr11:54756490	AGA
Cdc42se2	0.49375	0.00736094	chr11:54787638	CUG	chr11:54787638	CUG
Gnb2l1	-0.39091	0.00741157	chr11:48800423	CUG							chr11:48801676	acc	chr11:48803923	cca
Gnb2l1	-0.39091	0.00741157											chr11:48803497	tgg
Gnb2l1	-0.39091	0.00741157											chr11:48803463	tgc
Gnb2l1	-0.39091	0.00741157									chr11:48802292	cca	chr11:48802292	cca
Gnb2l1	-0.39091	0.00741157									chr11:48801757	tct	chr11:48801757	tct
Gnb2l1	-0.39091	0.00741157									chr11:48805631	gct	chr11:48805631	gct
Gnb2l1	-0.39091	0.00741157									chr11:48800485	agg	chr11:48800485	agg
Gnb2l1	-0.39091	0.00741157
Atg4b	0.371765	0.00742362
Ndufa11	0.558417	0.00747983									chr17:56717840	agc	chr17:56717840	agc
Plbd2	-0.419295	0.00751986
Rnf216	-0.384905	0.00755192			chr5:143112905	AUG
Ccdc124	0.501048	0.00767662									chr8:70869958	agg	chr8:70869958	agg
Ctsc	-0.263645	0.00772174
Snapc5	0.534474	0.00772174									chr9:64179393	ctg	chr9:64179393	ctg
Snapc5	0.534474	0.00772174									chr9:64180586	atg	chr9:64180523	gag
Cbfa2t3	-0.268047	0.00776304			chr8:122699055	ACG
Tnpo3	-0.450258	0.00781204	chr6:29609813	AUG	chr6:29609813	AUG
Zpr1	-0.261669	0.00809387
Akt2	-0.427868	0.00810842	chr7:27591828	AGA	chr7:27591828	AGA
Akt2	-0.427868	0.00810842	chr7:27605935	AUC
Ccdc86	0.52752	0.00810842	chr19:10949246		chr19:10949245		chr19:10949233	atg	chr19:10949233	atg
Med14	-0.441688	0.00813503
Tvp23b	0.448997	0.00817251	chr11:62879510	CGC	chr11:62879510	CGC	chr11:62879584	atg
Ddx27	-0.243348	0.00820321											chr2:167015388	cgg
2010107E04Rik	0.458207	0.00836221	chr12:111966970	AUU	chr12:111966970	AUU
Casc5	-0.526638	0.00837132											chr2:119057297	att
Polr3c	-0.344224	0.00839471	chr3:96727437	AUG	chr3:96727437	AUG
Polr3c	-0.344224	0.00839471	chr3:96727465	AUG	chr3:96727465	AUG
Asns	-0.215154	0.00842315	chr6:7693164	CUG	chr6:7693164	CUG							chr6:7689500	ggg
Tm2d2	0.472268	0.00843286
Pdia3	-0.415211	0.00844735	chr2:121413968	UUG	chr2:121413968	UUG
Capn1	-0.246107	0.00851952									chr19:5990390	aac
Elovl6	-0.397847	0.00853188	chr3:129532486	ACA	chr3:129532443	AGG
Elovl6	-0.397847	0.00853188	chr3:129532657	AUC	chr3:129532657	AUC
Glg1	-0.4556	0.00854762									chr8:111157912	agg
Lsm1	0.445748	0.00877337	chr8:25785659		chr8:25785659		chr8:25785671	atg	chr8:25785671	atg
Prkar2a	-0.462723	0.00880005
Ubxn2a	0.375745	0.00884831	chr12:4907378	GUG	chr12:4907378	GUG							chr12:4902234	tgg
Tmem251	0.451249	0.00891055	chr12:102744074								chr12:102744101	ctg	chr12:102744101	ctg
Tmem251	0.451249	0.00891055									chr12:102744611	ctt	chr12:102744611	ctt
Tmem251	0.451249	0.00891055					chr12:102744086	atg					chr12:102744650	ttt
Pgs1	-0.504422	0.00904969
Edf1	0.392796	0.00905626									chr2:25557960	acc	chr2:25557960	acc
Arhgef12	-0.387585	0.00910802
Tsg101	0.364388	0.0094915									chr7:46919854	ctg	chr7:46919854	ctg
Tmem256	0.458708	0.00953888									chr11:69838934	agg	chr11:69838934	agg
Cox19	0.447774	0.00966491	chr5:139345166		chr5:139345165		chr5:139345154	atg	chr5:139345153	atg
Lman1	-0.258331	0.0096819
Mbd3	0.277976	0.00983087	chr10:80399361	CUG	chr10:80399361	CUG
Hmgn1	0.609808	0.00991375	chr16:96127648	ACG	chr16:96127648	ACG
Uros	0.34023	0.00996812
Acly	-0.212418	0.0099769	chr11:100527837	AGA	chr11:100527837	AGA	chr11:100523599	atg	chr11:100523599	atg	chr11:100523578	aaa	chr11:100523578	aaa
Rpl4	-0.372877	0.0100053	chr9:64173418		chr9:64173419		chr9:64173431	atg	chr9:64173431	atg	chr9:64178294	gca
Shoc2	-0.334533	0.0100223	chr19:53987531	CGG	chr19:53987532	GGA					chr19:53987693	aag
Ccng1	-0.329598	0.0100411	chr11:40755177	CUG	chr11:40755177	CUG	chr11:40755000	atg	chr11:40755000	atg
Cox8a	0.483943	0.0101525	chr19:7217562	UUG	chr19:7217562	UUG	chr19:7217513	atg	chr19:7217513	atg
Tnk2	-0.609897	0.0101988
Rad23b	-0.394511	0.010317	chr4:55350084	GUG	chr4:55350084	GUG							chr4:55366785	att
Man1a	-0.378261	0.0104191	chr10:54075585	AGA	chr10:54075585	AGA
Man1a	-0.378261	0.0104191	chr10:54075698	CAC	chr10:54075698	CAC
Jak2	-0.462075	0.0104429
Atp6v1b2	-0.206334	0.010449									chr8:69088798	cgg
Fkbp4	-0.416791	0.0104615
Ifrd2	0.373906	0.0104615			chr9:107587876				chr9:107587888	atg	chr9:107589940	gcc	chr9:107589940	gcc
Ube2b	0.364475	0.0105377
St3gal6	-0.485525	0.0105458	chr16:58507554	AGC	chr16:58507554	AGC
St3gal6	-0.485525	0.0105458	chr16:58523175	AUG	chr16:58523175	AUG
Cep57	-0.34328	0.0105714			chr9:13826862								chr9:13826862	cta
Spats2	-0.546918	0.0106993
Gars	-0.21654	0.0107997									chr6:55038213	gcc	chr6:55038213	gcc
Gars	-0.21654	0.0107997									chr6:55038171	aca	chr6:55038171	aca
Tnrc6c	-0.432447	0.0108007
Slc25a3	-0.203416	0.0108277			chr10:91123983	GGC							chr10:91118143	ctt
Slc25a3	-0.203416	0.0108277			chr10:91124001	CGG							chr10:91117081	cag
Nab1	-0.447284	0.010836
Top2b	-0.419814	0.0108553	chr14:16365315	AGG	chr14:16365315	AGG
Vps13b	-0.400539	0.0109011
Ndnl2	-0.42331	0.0109091	chr7:64872959	CGC
Tufm	-0.456664	0.0109937
Dcaf5	-0.435019	0.0110052	chr12:80436545	AUG	chr12:80436545	AUG
Vps4b	-0.357549	0.0111282									chr1:106796439	ctg	chr1:106796439	ctg
Arrdc2	0.644276	0.0112161
Anapc11	0.403355	0.0112465	chr11:120598760	AAG	chr11:120598760	AAG	chr11:120599259	atg			chr11:120599263	aat
Stx11	0.417739	0.0113438
Hnrnpd	-0.392462	0.0114407	chr5:99978637		chr5:99978636		chr5:99978625	atg	chr5:99978624	atg	chr5:99964760	tgt
Orc5	-0.243586	0.0114407
Phospho2	-0.434788	0.0114928	chr2:69790290	UUC
Rab8a	0.272805	0.0114928
Atic	-0.210857	0.0115511	chr1:71557210	CUG	chr1:71557210	CUG					chr1:71557261	gcc	chr1:71559229	aca
Mipep	-0.349237	0.0116667
Kif14	-0.363425	0.0119196	chr1:136467891		chr1:136467891
Kif14	-0.363425	0.0119196	chr1:136467847		chr1:136467847
Dcaf13	-0.233698	0.0119477									chr15:39112990	cga	chr15:39112990	cga
Agps	-0.329279	0.011967
Lsm14a	-0.427492	0.0120337	chr7:34389606	AGG	chr7:34389605	GGC					chr7:34389473	tac	chr7:34375347	agt
Ypel5	0.357583	0.0121291
Dda1	0.501559	0.0122204	chr8:71469232	CGG	chr8:71469310		chr8:71469322	atg	chr8:71469322	atg
Papd7	-0.638003	0.0123315
Ssrp1	-0.427616	0.0126444			chr2:85037519	UUC					chr2:85046684	tcg	chr2:85038524	cgg
Ssrp1	-0.427616	0.0126444	chr2:85037858	GUG	chr2:85037858	GUG					chr2:85042708	ctg	chr2:85038408	caa
Ssrp1	-0.427616	0.0126444									chr2:85038524	cgg
Ssrp1	-0.427616	0.0126444									chr2:85038408	caa
Bmpr1a	-0.485812	0.0129015	chr14:34502538	CGG
Uchl5	-0.248296	0.0129209			chr1:143777329	CUG
Adam17	-0.363565	0.0129594	chr12:21373443		chr12:21373443		chr12:21373431	atg	chr12:21373431	atg
Snrpg	0.781628	0.0129631
Fasn	-0.378971	0.0129983	chr11:120824062	CUG	chr11:120824062	CUG					chr11:120813903	ggc	chr11:120813903	ggc
Gna13	-0.349797	0.013033
Abcc4	-0.379727	0.0132204			chr14:118706119				chr14:118706107	atg
Timm10b	0.570682	0.0132317									chr7:105640614	gag	chr7:105640613	cga
Timm10b	0.570682	0.0132317											chr7:105641043	aac
Timm10b	0.570682	0.0132317									chr7:105640789	tgt	chr7:105640789	tgt
Timm10b	0.570682	0.0132317											chr7:105640613	cga
Lap3	-0.237463	0.0132512									chr5:45493552	ctt	chr5:45493553	ttg
Usp16	-0.320653	0.0132547	chr16:87455098	UUG	chr16:87455099	UUG
Sord	-0.346837	0.0132821			chr2:122234821	CGA					chr2:122234907	ctg	chr2:122234907	ctg
Sord	-0.346837	0.0132821									chr2:122253299	cga
Sord	-0.346837	0.0132821									chr2:122264071	gta
Ybx3	-0.44505	0.0133382	chr6:131388268		chr6:131388339	ACG	chr6:131388255	atg	chr6:131388255	atg
Rxrb	-0.325671	0.0134291			chr17:34032424	CUG
Timm17a	0.426592	0.0138365									chr1:135313698	gaa	chr1:135313702	tgg
Fiz1	-0.379951	0.0138888	chr7:5014647	AGA	chr7:5014647	AGA
Hspe1	0.467184	0.013927									chr1:55089053	agg	chr1:55089053	agg
D8Ertd738e	0.524635	0.0139741	chr8:84249716		chr8:84249716		chr8:84249704	atg	chr8:84249704	atg	chr8:84246671	tga
Ndufv3	0.246507	0.0141478									chr17:31520222	cgg	chr17:31520222	cgg
Ipo5	-0.392873	0.0142535									chr14:120944523	agt
Ssh2	-0.388317	0.0142589
Mprip	-0.461061	0.0143783	chr11:59662550	CGG	chr11:59662550	CGG					chr11:59752559	gag	chr11:59752559	gag
Pgm1	-0.338829	0.014408									chr5:64093038	tgg
Deb1	0.602755	0.0144386
Polr2e	0.460978	0.0145089									chr10:80039631	tac	chr10:80039631	tac
Sos2	-0.390704	0.0145658
Cct4	-0.374891	0.0148691	chr11:22990710	CUG							chr11:23002894	agc	chr11:23002894	agc
Cct4	-0.374891	0.0148691											chr11:22997114	gag
Cct4	-0.374891	0.0148691											chr11:23000916	gag
Ssx2ip	-0.305649	0.0149054											chr3:146417756	aca
Ncoa6	-0.506991	0.0149514
Pikfyve	-0.357663	0.0152048	chr1:65186829		chr1:65186829		chr1:65186841	atg	chr1:65186841	atg
Usp1	-0.422449	0.0152534	chr4:98924099	ACU	chr4:98924099	ACU					chr4:98928945	aga	chr4:98928945	aga
Usp1	-0.422449	0.0152534			chr4:98923842	GGA					chr4:98928268	aga	chr4:98928267	aag
Usp1	-0.422449	0.0152534			chr4:98923970	CUG
Bicd2	-0.530399	0.0153775
Mrps21	0.561764	0.0154093	chr3:95870636	AUG	chr3:95870636	AUG
Mrps21	0.561764	0.0154093	chr3:95870610	AUG	chr3:95870610	AUG
Thg1l	0.364962	0.0154206
Uba2	-0.204491	0.015666											chr7:34168510	ggg
2810417H13Rik	0.548384	0.0156836
Dhx15	-0.202856	0.0157679	chr5:52190420	CUG	chr5:52190420	CUG
Cd59a	0.422791	0.0158841	chr2:104095877	GUG	chr2:104095877	GUG
Cd59a	0.422791	0.0158841			chr2:104097730	AGC
Cd59a	0.422791	0.0158841	chr2:104097775	AUG	chr2:104097775	AUG
Htatsf1	-0.393462	0.016056	chrX:57053586	CUG	chrX:57053586	ACU
Mogs	-0.414518	0.0161786
Taf2	-0.340661	0.0161963	chr15:55072128	CGC	chr15:55072128	CGC
Nln	-0.326987	0.0163194
Tmem242	0.600321	0.0167425			chr17:5440229				chr17:5440217	atg	chr17:5440165	tcg	chr17:5440164	cgg
Tkt	-0.192873	0.016948									chr14:30559826	tct	chr14:30559826	tct
Klc1	-0.375861	0.0169705	chr12:111759031		chr12:111759031		chr12:111759043	atg	chr12:111759043	atg
Cpsf2	-0.383968	0.0170263	chr12:101981935		chr12:101981935		chr12:101981947	atg	chr12:101981947	atg	chr12:102002657	tct
Gskip	0.390231	0.0170303	chr12:105685415	CGA	chr12:105685415	CGA					chr12:105698719	ata
Tmem9b	0.435581	0.01716
Rprd2	-0.403421	0.0175463	chr3:95819206	CUG	chr3:95819206	CUG
Mapkap1	-0.449808	0.0175674
4930523C07Rik	0.413251	0.0176633	chr1:160075041	GUG	chr1:160075041	CGU
4930523C07Rik	0.413251	0.0176633	chr1:160070756	CUG	chr1:160070756	CUG
Pex13	-0.426908	0.0177086
Rpl12	0.847837	0.0180159									chr2:32963573	act	chr2:32963573	act
Rpl12	0.847837	0.0180159									chr2:32961827	tgt	chr2:32963573	act
Psmc5	-0.208386	0.0180386	chr11:106256148	AUG	chr11:106256148	AUG					chr11:106256202	atg	chr11:106256202	atg
Vdac1	-0.372544	0.0181783									chr11:52374307	tac	chr11:52374307	tac
Golt1b	0.325748	0.0185703									chr6:142392334	aca	chr6:142392334	aca
Rps29	-7.44129	0.0187992									chr12:69158669	act	chr12:69158669	act
Creb1	-0.376689	0.0188061	chr1:64532962	AUC
P4hb	-0.366604	0.0188381	chr11:120572893	GAC	chr11:120572893	GAC	chr11:120572807	atg	chr11:120572807	atg
Slc20a1	-0.381074	0.0189342	chr2:129199467	AUG	chr2:129199466	AUG					chr2:129199725	cga	chr2:129199724	acg
Arid2	-0.316768	0.018936
Qrich1	-0.412109	0.0190509			chr9:108517108	AGG
Qrich1	-0.412109	0.0190509	chr9:108517229	ACA	chr9:108517229	ACA	chr9:108528609	atg	chr9:108528609	atg
Chaf1a	-0.235975	0.0190561
Commd4	0.419445	0.0192853	chr9:57158286		chr9:57158286		chr9:57158274	atg	chr9:57158274	atg
Cox10	-0.461913	0.0193994
Mdm4	-0.586717	0.0195374									chr1:133018811	ttc
Exoc5	-0.251882	0.0195515			chr14:49051428						chr14:49052384	tac	chr14:49051428	agg
Exoc5	-0.251882	0.0195515									chr14:49052384	tac	chr14:49052384	tac
Trp53	0.399937	0.0195808	chr11:69580408	CUG	chr11:69580408	CUG	chr11:69580518	atg	chr11:69580518	atg
Eef2k	0.399308	0.0196433									chr7:120876450	gac	chr7:120876450	gac
Ganab	-0.390725	0.01965											chr19:8915701	tgg
Rwdd1	0.479887	0.0196553	chr10:34019563	CUU	chr10:34019563	CUU					chr10:34019427	cgc
Sptb	-0.40669	0.0196739	chr12:76649974	CUG	chr12:76649974	CUG					chr12:76605503	ggg	chr12:76605503	ggg
Sptb	-0.40669	0.0196739	chr12:76710080	AUC							chr12:76610885	gac
Sptb	-0.40669	0.0196739									chr12:76605557	atc
Sptb	-0.40669	0.0196739									chr12:76649849	tgg
Foxred2	-0.463482	0.0202225
Eef2	-0.345416	0.0203058	chr10:81176691	AGA	chr10:81176691	AGA					chr10:81177673	atc	chr10:81177676	cgt
Cdc42bpa	-0.412727	0.0203376
Ier2	0.369623	0.020703			chr8:84662775	GUC
Ier2	0.369623	0.020703	chr8:84662817	CUG	chr8:84662817	CUG
Sgol1	-0.504595	0.0207688	chr17:53689222	AUG	chr17:53689222	AUG
Kif5b	-0.409287	0.0207954	chr18:6241468	CUG	chr18:6241468	CUG					chr18:6241075	aga	chr18:6241075	aga
Kif5b	-0.409287	0.0207954	chr18:6241302	GGA	chr18:6241299	AGU
Kif5b	-0.409287	0.0207954			chr18:6241353	AGG
Strbp	-0.392206	0.0207972			chr2:37647181	AGA
Skp2	-0.327627	0.0208397			chr15:9140368	AUG
Zfp148	-0.423064	0.0209432	chr16:33427207	GGA	chr16:33427207	GGA
Zfp148	-0.423064	0.0209432	chr16:33421372	CUG	chr16:33421372	CUG
Ska2	0.438346	0.0210245	chr11:87109243	AUG	chr11:87109243	AUG							chr11:87109280	ctg
Mcm4	-0.209947	0.0210622	chr16:15637211	CGC	chr16:15637211	CGC					chr16:15624698	ctg	chr16:15624698	ctg
Mcm4	-0.209947	0.0210622	chr16:15637232	AGA	chr16:15637232	AGA
Dnajc21	-0.435264	0.0211824
Alas2	0.216728	0.0213067			chrX:150552154				chrX:150552166	atg	chrX:150552176	ggt	chrX:150552175	cgg
Arhgap21	-0.404656	0.0213067
1110008P14Rik	0.527666	0.0216375			chr2:32381810	GUG
Sppl2a	-0.221429	0.0217061
Vps13a	-0.406529	0.0217856									chr19:16686514	cat
Piezo1	-0.333757	0.0218559
Gtf2f2	-0.230318	0.0221124	chr14:76010877	ACG	chr14:76010877	ACG							chr14:76010721	aac
Fopnl	0.364163	0.0224934									chr16:14317313	aaa	chr16:14317313	aaa
Higd1a	0.761137	0.0225238											chr9:121852581	ttt
Znrf1	-0.812023	0.0227087	chr8:111536880	AUG
Fam114a2	0.335622	0.0227703
Limd1	-0.37634	0.0229112	chr9:123478778	CGC	chr9:123478778	CGC
Nrde2	0.34947	0.0229112
Stam	-0.351469	0.0229839			chr2:14074327								chr2:14074327	aag
Csrp2bp	-0.388367	0.0232257	chr2:144373446	AUG	chr2:144373446	AUG
Csrp2bp	-0.388367	0.0232257	chr2:144369055	AGG	chr2:144369055	AGG
Csrp2bp	-0.388367	0.0232257	chr2:144373295	AUG
Ipmk	-0.395059	0.0232772
Eri3	0.298331	0.0232891			chr4:117550403	CUG
Eri3	0.298331	0.0232891			chr4:117550379	CUG
Eri3	0.298331	0.0232891	chr4:117550350	GUG	chr4:117550350	GUG
Eri3	0.298331	0.0232891	chr4:117550357	GUG	chr4:117550357	GGU
Nufip2	-0.355834	0.0234361
Atp5a1	-0.31349	0.0234993									chr18:77778472	cga	chr18:77778472	cga
Atp5a1	-0.31349	0.0234993									chr18:77780294	ttc	chr18:77780294	ttc
Atp5a1	-0.31349	0.0234993									chr18:77782319	gca	chr18:77782319	gca
Atp5a1	-0.31349	0.0234993									chr18:77782341	caa	chr18:77782341	caa
Atp5a1	-0.31349	0.0234993									chr18:77779133	aag	chr18:77779903	gga
Atp5a1	-0.31349	0.0234993									chr18:77778890	aca	chr18:77778888	aaa
Atp5a1	-0.31349	0.0234993									chr18:77781283	act	chr18:77781283	act
Atp5a1	-0.31349	0.0234993									chr18:77781054	ctg
Atp5a1	-0.31349	0.0234993									chr18:77781035	gtg
Nol12	0.442204	0.0235162
Atp7b	-0.22458	0.023565	chr8:22060187	CUG	chr8:22060068		chr8:22060056	atg	chr8:22060056	atg
Atp7b	-0.22458	0.023565	chr8:22060376	CGA
Mmab	0.575056	0.023565
Osbpl1a	-0.222966	0.0237452											chr18:12768562	tga
Ptpn11	-0.436467	0.0237452
Ccnd2	-0.374355	0.0239322	chr6:127150827	AAA	chr6:127150827	AAA
Cct8	-0.172261	0.0240737									chr16:87487539	tca	chr16:87488861	gtg
Cct8	-0.172261	0.0240737									chr16:87488861	gtg	chr16:87488861	gtg
Cct8	-0.172261	0.0240737									chr16:87484006	gac	chr16:87488861	gtg
Cct8	-0.172261	0.0240737									chr16:87487698	gag	chr16:87488861	gtg
Usp6nl	-0.389971	0.0240737	chr2:6336443				chr2:6336455	atg					chr2:6391068	ctt
Anapc5	-0.381844	0.0242332			chr5:122821256	AUG					chr5:122821121	aag	chr5:122821121	aag
Lamtor5	0.60858	0.0242765									chr3:107279066	atg	chr3:107279066	atg
Lamtor5	0.60858	0.0242765									chr3:107279084	cag	chr3:107279084	cag
Mdh2	-0.193853	0.0243096			chr5:135778681	UUG					chr5:135778736	tcg
Eif3h	-0.369799	0.0245179
Akr1a1	0.203914	0.0245731			chr4:116651354	AAG
Akr1a1	0.203914	0.0245731			chr4:116651511	CGU
Akr1a1	0.203914	0.0245731			chr4:116651570	AAG
Akr1a1	0.203914	0.0245731	chr4:116651603	GUG	chr4:116651603	GUG
Baz1b	-0.398143	0.0246721									chr5:135231725	tcc
Baz1b	-0.398143	0.0246721									chr5:135244429	ggg
Atp2c1	-0.328141	0.0247881
Eif4b	-0.380671	0.024973											chr15:102082077	aaa
Stim2	-0.407855	0.0250609
BC027231	-0.325701	0.0251975											chr16:44724383	tgg
Rps19	-0.467662	0.0252688	chr7:24884655	GUG	chr7:24884655	GUG					chr7:24885141	aaa	chr7:24885141	aaa
Ola1	-0.371131	0.0257162
Ppp1r2	0.553914	0.0257247			chr16:31275140	CGG
Nr3c1	-0.318522	0.0257941	chr18:39487245		chr18:39487245		chr18:39487233	atg	chr18:39487233	atg	chr18:39487155	tat	chr18:39487155	tat
Uqcrh	0.384795	0.0258713	chr4:116074982		chr4:116074982		chr4:116074970	atg	chr4:116074970	atg
Eif4g3	-0.364889	0.0259422
Lsm7	0.884461	0.0262548									chr10:80855184	aaa	chr10:80855184	aaa
Fam210b	0.401181	0.026633
Tti2	0.378995	0.0266641			chr8:31150396	UUA
Tti2	0.378995	0.0266641	chr8:31150668	GUG	chr8:31150669	GUG
Sf3b2	-0.191258	0.0268619
Rps4x	-0.425059	0.0269013	chrX:102189347	AGA	chrX:102189347	AGA
Atg3	-0.295802	0.027004
Tmem87a	-0.369582	0.0271419									chr2:120404037	gtg	chr2:120404037	gtg
Tmem87a	-0.369582	0.0271419											chr2:120404060	tgg
Tada2a	-0.363869	0.0273253	chr11:84127074	UUG	chr11:84127074	UUG
Tomm5	0.481806	0.0274605									chr4:45107989	atg
Gpr89	0.313324	0.0274704			chr3:96905258	AUG
Uqcrc1	-0.187029	0.0274704	chr9:108936706		chr9:108936706		chr9:108936718	atg	chr9:108936718	atg
Fth1	-0.38796	0.0275666	chr19:9982742	CGG	chr19:9982742	CGG					chr19:9982968	atg	chr19:9982968	atg
Fth1	-0.38796	0.0275666	chr19:9982811	GUU	chr19:9982811	GUU					chr19:9984922	aga	chr19:9984921	gag
Fth1	-0.38796	0.0275666									chr19:9984795	ctg
Fth1	-0.38796	0.0275666									chr19:9984190	atg
Got2	-0.376668	0.027801
Nomo1	-0.390901	0.0280405											chr7:46037565	atg
Nomo1	-0.390901	0.0280405									chr7:46033933	gtg	chr7:46033933	gtg
Axin1	-0.350201	0.028136
Nsmce2	-0.287022	0.0281568	chr15:59374317	AUC	chr15:59374317	AUC	chr15:59378882	atg
Gabarap	0.209992	0.0283302									chr11:69992621	tgc	chr11:69992621	tgc
Sbno1	-0.407595	0.0284488									chr5:124376222	tca
Sbno1	-0.407595	0.0284488									chr5:124381557	act
Mtdh	-0.393751	0.0286959	chr15:34082789	CUG
Mfn2	-0.363012	0.028786											chr4:147898532	tgg
Spop	-0.482035	0.0287867
Utp15	-0.215482	0.0288984	chr13:98262965	AUG	chr13:98262965	AUG
Utp15	-0.215482	0.0288984	chr13:98262994	GUG	chr13:98262994	GUG
Ndufb10	-0.208895	0.0289422	chr17:24724389	GUG							chr17:24722788	atg
Mns1	-0.187749	0.0290419	chr9:72438611	CAA	chr9:72438611	CAA
Mns1	-0.187749	0.0290419	chr9:72438583	GUG	chr9:72438583	GUG
Cdc42se1	0.330987	0.0291062	chr3:95231785	AAG	chr3:95231785	AAG
Cdc42se1	0.330987	0.0291062	chr3:95231928	GUG	chr3:95231928	GUG
Cdc42se1	0.330987	0.0291062	chr3:95232009	CUG	chr3:95232009	CUG
Cdc42se1	0.330987	0.0291062			chr3:95231961	UUA
Cdc42se1	0.330987	0.0291062			chr3:95228861	GCC
Ssna1	0.413711	0.0292025									chr2:25272059	tga	chr2:25272059	tga
Ssna1	0.413711	0.0292025									chr2:25272319	tgg	chr2:25272319	tgg
Atp5j2	0.388661	0.0293124									chr5:145184541	atg
Cbfa2t2	-0.411653	0.0293765
Slc4a1	0.363061	0.0293796	chr11:102361428	CUG	chr11:102361428	CUG
Slc4a1	0.363061	0.0293796			chr11:102365105	AGG
Usp39	-0.2312	0.0293796
Nfe2l1	-0.400103	0.0294071	chr11:96828190	CUG	chr11:96828190	CUG
Nfe2l1	-0.400103	0.0294071	chr11:96827965	AUC	chr11:96828056	GAG
Tssc4	0.427642	0.0294175	chr7:143069945		chr7:143069944		chr7:143069957	atg	chr7:143069956	atg			chr7:143070041	tta
Tmem167	0.383098	0.0294582
Pi4kb	-0.354681	0.0294974	chr3:94983998		chr3:94983998		chr3:94984011	atg	chr3:94984010	atg
Xpo5	-0.20405	0.0295408	chr17:46202862	GUA							chr17:46242254	cct	chr17:46242254	cct
Abhd14a	0.447824	0.0296434
Hspa9	-0.361055	0.0298178									chr18:34947937	tct	chr18:34947937	tct
Hspa9	-0.361055	0.0298178									chr18:34949033	gca	chr18:34938962	agt
C330027C09Rik	-0.390933	0.0298897			chr16:48994265				chr16:48994277	atg			chr16:48998972	aga
Btbd1	-0.435812	0.0301789
Hsd17b4	-0.218664	0.0310931	chr18:50128304	ACG	chr18:50128307	CUG					chr18:50128357	ttc	chr18:50128357	ttc
Mpp5	-0.361377	0.0310975
Cnot2	0.224083	0.0312533									chr10:116549068	tat
Cnot2	0.224083	0.0312533									chr10:116527935	aga	chr10:116527934	gaa
Stk24	-0.381247	0.0315766									chr14:121378903	aag	chr14:121378903	aag
Capn10	0.443634	0.0318887
Dock9	-0.382884	0.032004									chr14:121797595	act	chr14:121797595	act
Vcp	-0.227353	0.0321056	chr4:43000299	UUG	chr4:43000323	CUG					chr4:42980550	tat	chr4:42980550	tat
Vcp	-0.227353	0.0321056	chr4:43000253	CUG	chr4:43000253	CUG							chr4:42988707	atg
Suclg2	-0.3478	0.0322787									chr6:95718748	ttc
Xrcc6	-0.218679	0.03283
Hdac2	-0.366809	0.0328903			chr10:36974739				chr10:36974751	atg
Jmy	-0.315936	0.0330165
D19Bwg1357e	-0.369879	0.0330209											chr19:27424321	aaa
Tax1bp1	-0.351245	0.0330209	chr6:52713850		chr6:52713850		chr6:52713862	atg	chr6:52713862	atg
Triobp	0.345065	0.0330715
Egln3	0.378067	0.0332053	chr12:54203703	CGG	chr12:54203703	CGG
Nono	-0.36956	0.0336593	chrX:101430495	AGG	chrX:101430495	AGG					chrX:101444281	gaa
Nono	-0.36956	0.0336593			chrX:101429546	AUG					chrX:101444281	gaa
Ube2i	0.778097	0.033781	chr17:25274281	CUG	chr17:25274281	CUG
Stam2	-0.33047	0.0339882	chr2:52742112		chr2:52742112		chr2:52742100	atg	chr2:52742100	atg
Oat	-0.183678	0.0340286	chr7:132570117		chr7:132570117		chr7:132570105	atg	chr7:132570105	atg
Uimc1	0.296934	0.0341096
C1qbp	-0.33272	0.034334	chr11:70982963		chr11:70982963		chr11:70982951	atg	chr11:70982951	atg	chr11:70978497	ggt
Scaf8	-0.340576	0.0344421									chr17:3115410	att	chr17:3115410	att
Dync1h1	-0.673485	0.0344435	chr12:110601593		chr12:110601593		chr12:110601605	atg	chr12:110601605	atg
Sec61a1	-0.214585	0.0347401
Skp1a	0.354236	0.0354843	chr11:52232069	CGG	chr11:52232069	CGG					chr11:52236837	agt	chr11:52236837	agt
2700081O15Rik	-0.744158	0.0355147
Lasp1	0.399415	0.0356843	chr11:97799781		chr11:97799781		chr11:97799793	atg	chr11:97799793	atg
Csnk2a2	-0.353385	0.0361238
Slc39a9	0.382511	0.0362052			chr12:80644822	CUG
Tspan31	0.565203	0.0364301
Atp6v0a1	-0.224803	0.0364461			chr11:101011786	GGA
Ralbp1	-0.311162	0.0366478	chr17:65884685	AUG	chr17:65884685	AUG					chr17:65854154	aag	chr17:65854154	aag
Hook3	-0.336558	0.0366533
Snrnp40	-0.207131	0.0366748									chr4:130360208	aag
Neurl4	-0.376975	0.0369206
Got1	-0.355341	0.0369489			chr19:43524467				chr19:43524455	atg	chr19:43524413	tta	chr19:43524413	tta
Ipo11	-0.362973	0.0370433
Bbip1	0.399398	0.0371154	chr19:53944438	AUG	chr19:53943499	AAA
Rpl23a	1.38138	0.0373076
Rpl8	-0.316662	0.0380972									chr15:76904313	tcc	chr15:76904313	tcc
Fam179b	-0.347595	0.0381283
Supt4a	0.446511	0.0387418									chr11:87737608	aag	chr11:87737608	aag
Cndp2	-0.299633	0.0387899
Elp5	0.328696	0.0391441	chr11:69980459	AUG	chr11:69980460	AUG	chr11:69980260	atg
Elp5	0.328696	0.0391441	chr11:69980272	AUG	chr11:69980272	AUG
Jund	0.438428	0.0393068
Cnot10	-0.292351	0.0394084	chr9:114639952		chr9:114639952		chr9:114639940	atg	chr9:114639940	atg
Dyrk1a	-0.310466	0.0396063			chr16:94611422	CUG
Dyrk1a	-0.310466	0.0396063	chr16:94570460	CGC	chr16:94570460	CGC
Eftud2	-0.178268	0.03997
Prpsap1	-0.277868	0.0400592	chr11:116490230				chr11:116490218	atg
Tfdp1	-0.325921	0.0400898	chr8:13338804	GUC	chr8:13338804	GUC	chr8:13339727	atg	chr8:13339727	atg	chr8:13365160	atg	chr8:13365160	atg
Tfdp1	-0.325921	0.0400898	chr8:13339665	CUU							chr8:13365160	atg
Psma2	-0.202528	0.0401568
Nadk2	-0.198813	0.0401871									chr15:9108321	gaa	chr15:9108321	gaa
Nadk2	-0.198813	0.0401871											chr15:9083352	agg
Gnai2	0.210404	0.040221	chr9:107635332	GAG	chr9:107635332	GAG
Idh3a	-0.180485	0.0405154									chr9:54586538	ggc	chr9:54586538	ggc
Idh3a	-0.180485	0.0405154									chr9:54603314	aca
Lsm14b	-0.470055	0.0405488
Smcr8	-0.31889	0.0405488	chr11:60777664	CGA	chr11:60777664	CGA
Whsc1l1	-0.360206	0.0407499
Vdac2	-0.178554	0.0410216	chr14:21831582	CAA	chr14:21831864								chr14:21833826	tgc
Vdac2	-0.178554	0.0410216	chr14:21831600	GUG			chr14:21831876	atg	chr14:21831876	atg
Zfp64	-0.410576	0.0410346
Uspl1	0.26923	0.0411522	chr5:149184767	AUG	chr5:149184767	AUG
Psmg3	0.315182	0.0411902	chr5:139826356		chr5:139826356		chr5:139826344	atg	chr5:139826344	atg
Dnaja2	-0.182237	0.0412067									chr8:85555233	tac	chr8:85555233	tac
Itm2b	-0.190829	0.0415453											chr14:73385112	ctg
Slc7a6	-0.368928	0.0417581
Larp4	-0.340537	0.042095	chr15:99972923	GUG
Minos1	0.364398	0.042095									chr4:139130977	aga	chr4:139130977	aga
Trip4	-0.276828	0.042095
Dynll1	0.496878	0.0427586	chr5:115300860	CUG	chr5:115300860	CUG							chr5:115300566	agt
Dynll1	0.496878	0.0427586	chr5:115300911	CUG
Mina	-0.28319	0.0427829	chr16:59475525		chr16:59475525		chr16:59475538	atg	chr16:59475537	atg
Mapk1	-0.187595	0.0428408	chr16:16983442	GUU	chr16:16983442	GUU
Zfp740	-0.364182	0.0428408
Hspa4	-0.321826	0.0431878	chr11:53300321	ACG	chr11:53300321	ACG							chr11:53262414	gct
Hspa4	-0.321826	0.0431878	chr11:53300390	GUG	chr11:53300390	GUG					chr11:53266008	gct	chr11:53266008	gct
Hspa4	-0.321826	0.0431878	chr11:53300214	GGC	chr11:53300214	GGC
Hspa4	-0.321826	0.0431878	chr11:53300441	AGA	chr11:53300441	AGA
Wdr5	-0.212691	0.0432002	chr2:27518633	UCA	chr2:27518633	UCA
Zhx1	0.354029	0.0432743			chr15:58076197	AGG
Zhx1	0.354029	0.0432743			chr15:58069407	AUG
Cct2	-0.307642	0.043307	chr10:117063767	GCG	chr10:117063767	GCG	chr10:117063708	atg	chr10:117063708	atg	chr10:117063032	tca	chr10:117063032	tca
Pola2	0.209571	0.043344	chr19:5964103	CGA	chr19:5964103	CGA
Pola2	0.209571	0.043344	chr19:5963973	AGG	chr19:5963973	AGG
Pola2	0.209571	0.043344	chr19:5964136	GUG	chr19:5964136	GUG
Atf1	-0.380565	0.043449
Bpgm	0.367372	0.0436265	chr6:34476342	AUG	chr6:34476342	AUG
Zdhhc13	-0.312193	0.043686
Lrp10	-0.359334	0.0437559	chr14:54464393	CUG	chr14:54464393	CUG
Rad50	-0.318411	0.0437559	chr11:53707164	UUG
Dnaja1	-0.345297	0.0437837	chr4:40722631		chr4:40722631		chr4:40722643	atg	chr4:40722643	atg
U2af1l4	0.400663	0.0438316	chr7:30563343		chr7:30563343		chr7:30563355	atg	chr7:30563355	atg
Brwd1	0.375427	0.043915
Khsrp	-0.402225	0.0440203									chr17:57025061	cga
Etnk1	-0.338308	0.0442481			chr6:143167432	GUG
2810403A07Rik	-0.326827	0.0443568
Arpc2	-0.344861	0.0447133	chr1:74236613	CUG
Usp37	-0.299301	0.0448073
Pde6d	0.380109	0.0448855			chr1:86582462	AGG					chr1:86582344	cgg
Itgb2	-0.226042	0.0449037			chr10:77530395	AGA
Dock8	-0.205969	0.0450603			chr19:24999574	CGU
Npepps	-0.335817	0.0452052
Snx6	-0.217754	0.0454049									chr12:54795471	gcg	chr12:54795471	gcg
Stk4	-0.21491	0.0454584
Cul5	-0.320848	0.0457715									chr9:53667059	ctg	chr9:53667059	ctg
Psap	-0.344139	0.0458003
Emc10	0.354799	0.045907									chr7:44496358	acc	chr7:44496358	acc
Zfyve1	0.338587	0.0460988
Twf2	-0.319366	0.0463446	chr9:106203205	AGA	chr9:106203205	AGA
Rnf181	0.367159	0.0463588									chr6:72362357	cac	chr6:72362357	cac
Lsm4	0.399311	0.0463776	chr8:70673445		chr8:70673445		chr8:70673457	atg	chr8:70673457	atg	chr8:70677865	atg
Samm50	-0.190816	0.0464174									chr15:84211038	gcc
Srsf6	-0.331736	0.0465676
Rps8	-1.52756	0.0467053											chr4:117156060	gga
Rap1gds1	-0.328485	0.0468588
Aldoa	-0.349338	0.0468733									chr7:126797732	aag	chr7:126797342	agg
Aldoa	-0.349338	0.0468733									chr7:126797762	cac	chr7:126797762	cac
Aldoa	-0.349338	0.0468733									chr7:126797466	gtg	chr7:126797466	gtg
Dgkd	-0.449024	0.0469212
Snx17	-0.262776	0.0469982	chr5:31193318	CGC	chr5:31193318	CGC
Slc7a8	-0.330998	0.0471228
Btaf1	-0.360877	0.0471875	chr19:36926189	CUG	chr19:36926190	CUG					chr19:37003503	acc	chr19:37000408	tat
Btaf1	-0.360877	0.0471875			chr19:36926336	GUG					chr19:37004539	cat	chr19:36945213	tta
Btaf1	-0.360877	0.0471875									chr19:37003571	cag
Cep120	-0.31354	0.0473232
Phactr4	0.352459	0.0475458									chr4:132387046	atg	chr4:132387046	atg
Nop2	-0.207394	0.0476167
Tmem248	-0.360565	0.0476494			chr5:130222395	CUG
Tcp11l2	0.321638	0.047708	chr10:84584766	CUG	chr10:84584766	CUG
Nrd1	-0.362494	0.0477482
Fam213a	0.344462	0.0482612									chr14:41004185	cca	chr14:41004185	cca
Dhx36	-0.36055	0.048281											chr3:62470691	gac
Rps10	-0.399637	0.0484186									chr17:27631203	ttt	chr17:27631203	ttt
Mink1	-0.269811	0.0489534
Poc5	-0.350422	0.0489674	chr13:96388508	AUG	chr13:96388508	AUG							chr13:96391640	gtt
Cebpz	-0.349665	0.0489701											chr17:78937030	agg
Ikbkb	-0.274598	0.0489701
Cep76	-0.344615	0.049102			chr18:67641299	CCG
Ints6	-0.324586	0.0494922	chr14:62760907	ACG	chr14:62760907	ACG
Ints6	-0.324586	0.0494922			chr14:62760927	CGG
Mthfd1l	-0.400645	0.0495396
Mrpl37	-0.300363	0.0497629											chr4:107066781	cgg
Dnajc13	-0.327962	0.0499292	chr9:104262903	AGG	chr9:104262903	AGG
Utp20	-0.364763	0.0500097
Alg6	-0.288029	0.0503666	chr4:99715697	ACA
Adgre5	-0.353492	0.0504534
Hif3a	-0.207692	0.0505295									chr7:17056590	ggt	chr7:17056590	ggt
Cdca3	0.284723	0.0505709	chr6:124830518		chr6:124830518		chr6:124830530	atg	chr6:124830530	atg
Sapcd1	0.353556	0.0507162									chr17:35027866	ctg	chr17:35026780	att
Sapcd1	0.353556	0.0507162									chr17:35026392	cct
Slc12a2	-0.311851	0.0508069
Tsnax	-0.214729	0.0508792	chr8:125013143	CGG	chr8:125013143	CGG							chr8:125013512	gga
Tsnax	-0.214729	0.0508792	chr8:125013085	CUG	chr8:125013085	CUG
Acaca	-0.402695	0.0509104									chr11:84195469	ttg
Ufm1	0.326612	0.0510624									chr3:53863667	aaa	chr3:53863667	aaa
Cript	0.345759	0.0511359	chr17:87025620	AGG	chr17:87025620	AGG
Pbrm1	-0.365695	0.051275									chr14:31027448	atg	chr14:31027448	atg
Smg7	-0.326552	0.0513499
Dpy30	0.314488	0.0513866	chr17:74316357	GUA	chr17:74316347	UCC							chr17:74315930	cac
Dpy30	0.314488	0.0513866	chr17:74316347	UCC									chr17:74315930	cac
Wbp11	-0.29758	0.0513866	chr6:136826077		chr6:136826077		chr6:136826065	atg	chr6:136826065	atg
Hsp90aa1	-0.315419	0.0514361									chr12:110692225	tct	chr12:110692225	tct
Hsp90aa1	-0.315419	0.0514361									chr12:110695218	gca	chr12:110695218	gca
Hsp90aa1	-0.315419	0.0514361									chr12:110695140	acg	chr12:110695140	acg
Hsp90aa1	-0.315419	0.0514361									chr12:110694690	tta	chr12:110694690	tta
Hsp90aa1	-0.315419	0.0514361									chr12:110694278	gaa	chr12:110694278	gaa
Hsp90aa1	-0.315419	0.0514361									chr12:110694306	gga	chr12:110694306	gga
Hsp90aa1	-0.315419	0.0514361									chr12:110693721	ttc	chr12:110692721	ctt
Hsp90aa1	-0.315419	0.0514361									chr12:110692253	aat	chr12:110692253	aat
Hsp90aa1	-0.315419	0.0514361									chr12:110694191	aaa	chr12:110694191	aaa
Hsp90aa1	-0.315419	0.0514361									chr12:110693153	cgg	chr12:110693154	tcg
Hsp90aa1	-0.315419	0.0514361									chr12:110692229	gtc	chr12:110692229	gtc
Hsp90aa1	-0.315419	0.0514361									chr12:110692667	gag	chr12:110692838	cga
Hsp90aa1	-0.315419	0.0514361									chr12:110692703	gaa
Hsp90aa1	-0.315419	0.0514361									chr12:110692196	tct
Hsp90aa1	-0.315419	0.0514361									chr12:110695065	ggt
Hsp90aa1	-0.315419	0.0514361									chr12:110694239	gtt
Lsm12	-0.296998	0.0515271
Tagln2	-0.160488	0.0525624	chr1:172500325	UUG	chr1:172500323	UUU	chr1:172505148	atg	chr1:172505147	atg			chr1:172506196	cgg
Dtl	-0.208401	0.0527693									chr1:191570657	atg	chr1:191570657	atg
Rps24	-0.344372	0.052797	chr14:24490690	CGG	chr14:24490690	CGG
Gak	-0.302618	0.0530437
Zfp706	0.594811	0.0530437	chr15:37007175	CGC	chr15:37007175	CGC
Nnt	-0.355822	0.0530707
Smad2	-0.258411	0.0531772			chr18:76262463	UAC
Taf1c	0.323376	0.0532142
Tmem147	0.374414	0.0532896			chr7:30729481	CGC
Tbk1	-0.280649	0.053294	chr10:121586702	AUG	chr10:121586702	AUG					chr10:121584273	tgt	chr10:121584273	tgt
Cyp20a1	-0.263342	0.0532954
Hsp90ab1	-0.280699	0.0533569	chr17:45573197	CUC	chr17:45573197	CUC	chr17:45573167	atg	chr17:45573167	atg	chr17:45569527	gag	chr17:45568885	aag
Asap1	-0.346321	0.0534249	chr15:64312486				chr15:64312474	atg			chr15:64089464	act	chr15:64089464	act
Gdap2	-0.348413	0.0534572
Psmd10	0.305467	0.0534572											chrX:140956659	ata
Dgcr8	-0.311683	0.0536147	chr16:18284674	AGA	chr16:18284674	AGA
Dgcr8	-0.311683	0.0536147			chr16:18284502	AUG
Optn	-0.314274	0.0536147	chr2:5063975	UUG	chr2:5063975	UUU					chr2:5054684	agg	chr2:5054684	agg
Uhrf1bp1	-0.304886	0.0536147	chr17:27856580	CUG	chr17:27856580	CUG
Ctnnb1	-0.176377	0.0536275	chr9:120933635	AGC							chr9:120950550	aaa	chr9:120950550	aaa
Mapk6	0.309281	0.0536941
C2cd3	-0.315802	0.0536979	chr7:100372373	UAC	chr7:100372373	UAC
Fmnl1	-0.316834	0.053833
Shcbp1	-0.23061	0.0541114									chr8:4779521	cgg	chr8:4779521	cgg
Rreb1	-0.346747	0.054694
Uqcrc2	-0.175802	0.0552051	chr7:120635277		chr7:120635258	AAG	chr7:120635289	atg	chr7:120635289	atg
Cux1	0.299322	0.0553295
Lpl	-0.331048	0.0553417	chr8:68880604	CUG	chr8:68880604	CUG	chr8:68880752	atg	chr8:68880752	atg	chr8:68887584	atg	chr8:68887584	atg
Mapk7	0.343353	0.0554212
Txndc17	-0.360395	0.0555248	chr11:72207611		chr11:72207611		chr11:72207623	atg	chr11:72207623	atg
Prkcsh	-0.352783	0.0557434											chr9:22003494	gtt
Prkcsh	-0.352783	0.0557434	chr9:22003034	CUA							chr9:22003772	atg	chr9:22003772	atg
Polr1c	-0.195875	0.0558949									chr17:46247940	cgc	chr17:46247940	cgc
Pik3cb	-0.335566	0.0560128
Yme1l1	-0.331436	0.0563167	chr2:23156635	CUG
Yme1l1	-0.331436	0.0563167	chr2:23156664	GUA	chr2:23156664	GUA
Yme1l1	-0.331436	0.0563167	chr2:23156242	AGG
Yme1l1	-0.331436	0.0563167	chr2:23156516	UAG
Nhp2l1	-0.438274	0.0563745
Rsl24d1	-0.594043	0.0564823											chr9:73114998	ttt
Med26	-0.339202	0.0566499
Hmgb2	0.36833	0.0566771	chr8:57511968	CUG	chr8:57511968	CUG
Ppp2r1a	-0.178437	0.0566856
Atp5b	-0.139221	0.0572934	chr10:128083315		chr10:128083315		chr10:128083327	atg	chr10:128083327	atg
Pck2	-0.258413	0.0576033
Rnf115	-0.324904	0.0577482									chr3:96727847	cac	chr3:96727847	cac
Sec11c	0.196632	0.0578468									chr18:65809460	tga	chr18:65809460	tga
Sec11c	0.196632	0.0578468											chr18:65809489	aaa
Ndufs2	-0.18721	0.0579732
Gpn3	-0.210076	0.0579752	chr5:122372540	CGA	chr5:122372540	CGA
Ccdc23	0.462449	0.0579944	chr4:119195447	GUG	chr4:119195447	GUG							chr4:119195919	aaa
Mff	-0.302634	0.0581673									chr1:82729258	cga	chr1:82729258	cga
Utp11l	-0.329099	0.0581697
Mtmr3	-0.357325	0.058771	chr11:4594778	GGU	chr11:4594778	GGU
Ascc2	-0.259134	0.0592918
3110062M04Rik	0.396746	0.0593681											chr6:34875593	atg
Snx2	-0.209076	0.0595124
Traf7	-0.285022	0.0603634	chr17:24527794	AGG	chr17:24527794	AGG
Rnps1	0.464716	0.060441									chr17:24418153	aaa	chr17:24418157	aga
Lpin1	0.291503	0.0605283	chr12:16589720	AGC
Sltm	-0.350876	0.0605283
Emc1	-0.368923	0.0608496									chr4:139352640	tgg	chr4:139352640	tgg
Dpp8	-0.341515	0.0610479	chr9:65034908	AUG	chr9:65034908	AUG					chr9:65037009	ttt	chr9:65037009	ttt
Dpp8	-0.341515	0.0610479	chr9:65034877	AAA	chr9:65034877	AAA
Polr2f	0.493735	0.0610557											chr15:79146061	att
Polr2f	0.493735	0.0610557									chr15:79144633	ttg	chr15:79144633	ttg
Tacc3	-0.189842	0.061447
Jmjd6	-0.283208	0.0616285	chr11:116843206		chr11:116843256	ACG	chr11:116843194	atg	chr11:116843194	atg
Ptp4a2	-0.426291	0.0618066	chr4:129839487	UUC
Nol9	-0.188685	0.0618811	chr4:152039342		chr4:152039342		chr4:152039354	atg	chr4:152039354	atg
R3hdm1	-0.309294	0.0618811	chr1:128103380	GUG	chr1:128151810	ACU
R3hdm1	-0.309294	0.0618811	chr1:128151756	AUC
Cox6a1	0.363703	0.0619263
Paip1	-0.307671	0.0627162			chr13:119428620	GUG					chr13:119429138	cgg	chr13:119429138	cgg
Srgap2	-0.3096	0.062765
Csk	-0.328431	0.0628503	chr9:57645063	CAG	chr9:57645063	CAG	chr9:57631382	atg
Csk	-0.328431	0.0628503	chr9:57631436	AGA
Ltv1	-0.334642	0.0630245									chr10:13190697	atg	chr10:13190697	atg
Mcu	-0.304727	0.0630655
Homer1	-0.357192	0.0631862	chr13:93304970	CUC	chr13:93304970	CUC
Rpl6	-0.38855	0.0633953									chr5:121205601	act	chr5:121205601	act
Rpl6	-0.38855	0.0633953									chr5:121206684	cgg
Dnajc10	-0.310891	0.0637239	chr2:80315773	CAG	chr2:80315773	CAG
Dnajc10	-0.310891	0.0637239	chr2:80317267	UUG
Fam178b	0.43768	0.0640209											chr1:36644309	att
Fam178b	0.43768	0.0640209											chr1:36635249	tgg
Rnmtl1	-0.278212	0.0640546
Ttc27	-0.194263	0.0640546					chr17:74717911	atg			chr17:74717926	ctg	chr17:74717926	ctg
Hdlbp	-0.324657	0.0646241	chr1:93440777	AGA	chr1:93442228	CGG					chr1:93440722	gaa	chr1:93440723	cga
Cnot7	-0.311325	0.0646544
Lsm2	0.51359	0.0650498	chr17:34981875	CGG	chr17:34981875	CGG					chr17:34982665	atg
Ppp6r2	-0.289055	0.0650498
Asxl1	0.202789	0.0651737	chr2:153346312	AGG	chr2:153346312	AGG
Heatr6	-0.275452	0.0652386											chr11:83753755	cga
Unc13d	-0.289138	0.0655086									chr11:116076549	atg	chr11:116076549	atg
Mospd1	-0.393269	0.0658135	chrX:53370490	CUG	chrX:53370485	AAG
Gpi1	-0.174728	0.0658498									chr7:34230181	tgg
Fbxo11	-0.301835	0.0662375
Tle3	-0.337999	0.0663019	chr9:61373123	ACC	chr9:61373123	ACC
Pus1	-0.204536	0.0666104	chr5:110780528	CUG	chr5:110780528	CUG
Plxnc1	-0.278033	0.0667884
Cenpk	-0.269265	0.0668854											chr13:104230876	aaa
Man2b1	-0.33939	0.0668872
Uqcr11	0.349188	0.0668872	chr10:80406817	AUG
Prdx1	-0.328301	0.0669379	chr4:116685609	ACG	chr4:116685609	ACG					chr4:116691849	gaa	chr4:116691894	tct
Arhgap23	0.456695	0.0670141
Ezh2	-0.196147	0.0670358									chr6:47577654	aat	chr6:47577654	aat
Baz2a	-0.355225	0.0671746
Tardbp	-0.169793	0.067518	chr4:148625375		chr4:148625375		chr4:148625363	atg	chr4:148625363	atg
Uqcrq	0.338163	0.0679156	chr11:53430738	CAC	chr11:53430736	CGC
Irf2bp1	-0.283049	0.0679908
Tex30	-0.285775	0.0692349	chr1:44102352	GUG	chr1:44102352	GUG
Canx	-0.287183	0.0692947									chr11:50297064	gaa	chr11:50311700	att
Canx	-0.287183	0.0692947									chr11:50311777	ggt	chr11:50311777	ggt
Atp1b3	-0.295373	0.0696103
Nop10	0.3227	0.0696781									chr2:112262320	aca
Ndufa10	-0.181529	0.0697182
Trub2	0.330806	0.0699242	chr2:29787647	AUG	chr2:29787647	AUG
Trmt11	-0.25432	0.0699301									chr10:30594146	aac	chr10:30594146	aac
Trmt11	-0.25432	0.0699301									chr10:30600656	ttg
Rpf2	-0.326129	0.0700186									chr10:40244615	caa
Tmem219	0.34943	0.0702172
Ext2	-0.254264	0.0704818	chr2:93813958	CUG	chr2:93813958	CCU
Ldb1	-0.185352	0.0709884			chr19:46039235	AUG
Ldb1	-0.185352	0.0709884			chr19:46044902	ACU
Stx2	0.317361	0.0709987
Cmtm7	0.38829	0.0713224									chr9:114763353	atg	chr9:114763353	atg
Cmtm7	0.38829	0.0713224									chr9:114781728	cgg	chr9:114781728	cgg
Terf2ip	-0.296112	0.07141	chr8:112011429	GUG	chr8:112011429	GUG
Szrd1	0.420768	0.0714403
Senp5	-0.291884	0.071569	chr16:32003026	GUG	chr16:32003026	GUG
Senp5	-0.291884	0.071569	chr16:32003083	GGG	chr16:32003083	GGG
Alg10b	-0.329534	0.0716702
Sympk	-0.325931	0.0717715									chr7:19028897	acc	chr7:19028897	acc
Fars2	-0.261508	0.0718837	chr13:36204517		chr13:36204517		chr13:36204529	atg	chr13:36204529	atg
Irf2bp2	-0.286043	0.0723922	chr8:126593869	CCG	chr8:126593869	CCG
E2f2	0.308523	0.072415
Fem1c	-0.293196	0.0727283			chr18:46525734	CGC
Rrm2	-0.179789	0.0728006											chr12:24708966	cgt
Chp1	0.28441	0.072849									chr2:119547889	aag	chr2:119547889	aag
Ermp1	-0.31169	0.0730016
Lrrc8c	-0.244765	0.0730016									chr5:105579480	cgg	chr5:105579480	cgg
Klhdc2	-0.268401	0.0731709			chr12:69296940	CGG							chr12:69297007	gag
Tsn	0.176107	0.0731735	chr1:118311182	GUG	chr1:118311079				chr1:118311067	atg	chr1:118304759	ttc	chr1:118311052	ctg
Gpx1	0.350111	0.0736005	chr9:108339266	ACG	chr9:108339301		chr9:108339313	atg	chr9:108339313	atg
Nkap	-0.316017	0.0736596	chrX:37126891	CUG	chrX:37126890	CUG					chrX:37127004	cgt	chrX:37127004	cgt
Nudt19	0.337421	0.0736596	chr7:35555817		chr7:35555817		chr7:35555805	atg	chr7:35555805	atg			chr7:35555280	tgg
Phospho1	0.475165	0.0737894									chr11:95828748	cga	chr11:95828748	cga
Pfdn2	-0.193283	0.0738286									chr1:171345717	cgt	chr1:171345717	cgt
Aldh4a1	-0.289336	0.0739264
Rasa2	-0.282809	0.0739605									chr9:96631434	acg	chr9:96631434	acg
Zfp871	0.320902	0.0743148			chr17:32788197	CUG					chr17:32777507	ttc	chr17:32777507	ttc
Ncf2	0.346785	0.0744768	chr1:152807866	AUG
Brd4	-0.319714	0.0744942	chr17:32253127	CUG	chr17:32253127	CUG							chr17:32229665	tgg
Tfr2	-0.280864	0.0746792											chr5:137571676	atg
Slc30a10	0.2916	0.0747552
Fam104a	0.434505	0.0748399									chr11:113684058	cgg
Abcf3	-0.245252	0.0752473
Homer2	-0.371873	0.0755179			chr7:81706897	CGC
Hmg20b	-0.314695	0.075566
Dock2	-0.17907	0.0760039									chr11:34247856	cgc	chr11:34247856	cgc
Spred1	-0.310478	0.0764666
Agtpbp1	-0.352594	0.0765692	chr13:59544445	AUG	chr13:59544445	AUG
Rnf220	-0.26079	0.076857									chr4:117285479	cat	chr4:117285479	cat
Trim33	-0.261606	0.0769989			chr3:103279867				chr3:103279879	atg
Rbm34	-0.248864	0.0771869
Stard7	-0.31527	0.0773273	chr2:127270424	AUG	chr2:127270424	AUG
Acp5	-0.175591	0.0774863			chr9:22135662	AAG
Acp5	-0.175591	0.0774863	chr9:22135711	CAC	chr9:22135711	CAC
Usp22	-0.262111	0.0775809	chr11:61175002	CUG	chr11:61175002	CUG					chr11:61174852	tgg	chr11:61174852	tgg
Enoph1	-0.293554	0.0776087	chr5:100040144	ACG	chr5:100040144	ACG
Srf	-0.54304	0.0776803
Tomm22	0.367493	0.077914									chr15:79670909	ggg	chr15:79670909	ggg
Ufsp2	0.313795	0.0779153	chr8:45979219		chr8:45979219		chr8:45979231	atg	chr8:45979231	atg
Fis1	0.317076	0.0781757	chr5:136953319	CUG	chr5:136962171		chr5:136962183	atg	chr5:136962183	atg	chr5:136962213	aag	chr5:136962214	aga
Tada1	-0.248291	0.0782614									chr1:166379424	aga	chr1:166379423	aag
Tfcp2	0.404005	0.0782903	chr15:100551459		chr15:100551459		chr15:100551447	atg	chr15:100551447	atg	chr15:100513127	atg	chr15:100513127	atg
Sel1l	-0.247639	0.0783935
Pabpn1	-0.330423	0.0786271											chr14:54894485	cta
Adsl	-0.174372	0.0786954
Mb21d1	0.26547	0.0787117											chr9:78443078	gta
Rnf6	-0.253198	0.0788549	chr5:146220815	AAG	chr5:146220815	AAG
Rnf6	-0.253198	0.0788549			chr5:146220866	AUA
Nop9	-0.309567	0.0788636
Laptm4a	0.191327	0.0788895											chr12:8922192	cgg
Dsn1	0.274683	0.079231	chr2:157007026	CGG	chr2:157007026	CGG					chr2:157005870	aga	chr2:157005870	aga
Gns	-0.269847	0.07951
Nfix	-0.331676	0.0796646	chr8:84800382	UUG	chr8:84800382	UUG
Msl1	-0.433074	0.0797307
Cops5	-0.17667	0.0800127	chr1:10037850	CGA	chr1:10037850	CGA
Slc7a1	-0.31495	0.0801262			chr5:148365237	GUG							chr5:148352406	cgc
2810474O19Rik	-0.334747	0.0801329	chr6:149309887	AAC	chr6:149309887	AAC
2810474O19Rik	-0.334747	0.0801329			chr6:149309727	CUG
Spta1	-0.736383	0.0801798	chr1:174172866	GAA	chr1:174172866	GAA					chr1:174172941	agg	chr1:174219771	aat
Actr2	-0.298357	0.0802589	chr11:20112865		chr11:20112864		chr11:20112852	atg	chr11:20112852	atg
Rif1	-0.32418	0.080348
Cltc	-0.303806	0.0805264	chr11:86757448	CUG	chr11:86757448	CUG					chr11:86702332	tgt	chr11:86711383	cgt
Ppp1r7	-0.182515	0.0806804
Elmsan1	-0.295242	0.0813607	chr12:84174401	GGG	chr12:84174401	GGG
Gcc2	-0.394798	0.0814482
Lrpprc	-0.306629	0.08148									chr17:84706031	gct	chr17:84706031	gct
4833420G17Rik	-0.289207	0.081505	chr13:119462862	CUG
Srebf2	-0.306186	0.0817275											chr15:82147457	tga
Tm2d3	-0.29328	0.0823611
Leprotl1	0.275987	0.0825028											chr8:34146700	aag
Ide	-0.317531	0.0826621
Pdha1	-0.311439	0.0828093									chrX:160138298	cgc	chrX:160138298	cgc
Txndc5	-0.317748	0.08284
Cd3eap	-0.256444	0.0829173	chr7:19359421		chr7:19359421		chr7:19359409	atg	chr7:19359409	atg
Egln1	-0.325797	0.0830626
Fam103a1	0.703458	0.083121	chr7:81763049	AAA	chr7:81763049	AAA
Rhot1	-0.265438	0.0833449	chr11:80209149	AGG	chr11:80209149	AGG
Yipf6	0.283693	0.0833832
Sfr1	-0.321776	0.0839771	chr19:47731783	CGC	chr19:47732640						chr19:47732640	atg	chr19:47732640	atg
Morc2a	-0.297819	0.0843168	chr11:3650092	UUG	chr11:3649954	AUG
Zfp672	0.551065	0.0843168
Eif4ebp2	-0.384451	0.0843571	chr10:61452558		chr10:61452558		chr10:61452546	atg	chr10:61452546	atg
Pfdn4	0.342816	0.084363
Tmem209	-0.180408	0.0854637	chr6:30509699		chr6:30509699		chr6:30509687	atg	chr6:30509687	atg
Ubr2	-0.194007	0.0857918
Smchd1	-0.325389	0.085825									chr17:71387044	cga	chr17:71387044	cga
Smchd1	-0.325389	0.085825									chr17:71370948	aag	chr17:71370948	aag
Smchd1	-0.325389	0.085825									chr17:71369937	ggc	chr17:71381449	aga
Plrg1	-0.178184	0.0858671			chr3:83055606	CUG
Mrpl50	0.284241	0.0860325	chr4:49521066		chr4:49521065		chr4:49521053	atg	chr4:49521053	atg
Zfp652	-0.325175	0.0862228
Tnrc6a	-0.328337	0.0863212	chr7:123124210	AUG	chr7:123124210	AUG
Prmt7	-0.290615	0.0864205	chr8:106211076	UAA
Tipin	0.356193	0.0869432
Tmem50a	0.307388	0.0871282	chr4:134914956	CUG	chr4:134914956	CUG					chr4:134913171	ggt
Ell	0.372496	0.0871753
Maz	-0.207535	0.0872882									chr7:127024923	aag	chr7:127024923	aag
Gtpbp3	0.330436	0.087325	chr8:71488775		chr8:71488775		chr8:71488787	atg	chr8:71488787	atg
Ppp3ca	-0.368367	0.087325
Ssb	-0.299203	0.0874174	chr2:69861680	GUG	chr2:69861680	GUG							chr2:69863261	aaa
Abcf2	-0.312767	0.0878642	chr5:24576727	CUG	chr5:24576727	CUG					chr5:24576620	tga
Prpf4	-0.24078	0.0878911
Nlk	-0.55126	0.0881184	chr11:78696731	AAG
Kars	-0.160798	0.0883421
Atox1	0.433276	0.0885672											chr11:55454939	gag
Snrpf	0.37393	0.0888596	chr10:93589553				chr10:93589541	atg			chr10:93588091	aag	chr10:93588091	aag
Tubb5	-0.134892	0.089101	chr17:35838170	CUG	chr17:35838170	CUG					chr17:35835731	act	chr17:35836730	atg
Tubb5	-0.134892	0.089101			chr17:35838119	UUC					chr17:35835663	gga	chr17:35836194	cca
Tubb5	-0.134892	0.089101									chr17:35835731	act
Tmed3	-0.287718	0.0893149
Tram1	-0.319955	0.0898976	chr1:13589874	AUG	chr1:13589874	AUG
Mkrn1	0.194034	0.0902474			chr6:39420425	CUG
Mkrn1	0.194034	0.0902474	chr6:39420343	AUG	chr6:39420343	AUG							chr6:39410179	atg
Vamp5	0.314882	0.0907227									chr6:72370299	acg	chr6:72370299	acg
Vamp5	0.314882	0.0907227									chr6:72370329	aag	chr6:72370329	aag
Ppp2r5d	-0.254777	0.0908475	chr17:46704872				chr17:46704860	atg
Strap	-0.319593	0.0908867			chr6:137735225	AGC
Spn	-0.295385	0.0910223	chr7:127137793	UUG	chr7:127137793	CUU	chr7:127137334	atg	chr7:127137334	atg
Lats1	-0.291701	0.0912557
Ybx1	-0.304993	0.0913664	chr4:119294384	CCG	chr4:119294384	CCG					chr4:119294307	aag	chr4:119279160	gaa
Atp5l	0.832132	0.0914323
Zrsr2	-0.28614	0.0914615											chrX:163958294	aaa
Gm15800	-0.310526	0.0917725
Nob1	-0.175337	0.0922584									chr8:107424996	agg	chr8:107424996	agg
Susd6	0.30066	0.0922584
Eml4	-0.294903	0.0925161	chr17:83351110	CGG	chr17:83351110	CGG
Eml4	-0.294903	0.0925161	chr17:83351030	GAC	chr17:83351030	GAC
Fam20b	-0.403859	0.092673
Klf9	-0.322562	0.0934675	chr19:23141360	GGC
Krr1	-0.300583	0.0935952									chr10:111972807	aaa	chr10:111972807	aaa
Stau1	-0.269735	0.0935952	chr2:166996242	CUG	chr2:166996242	CUG
Osbp	-0.260161	0.0936303
Eif3b	-0.14055	0.0937477									chr5:140427109	cca	chr5:140427109	cca
Eif3b	-0.14055	0.0937477									chr5:140442150	cgg	chr5:140427046	cag
Eif3b	-0.14055	0.0937477									chr5:140427418	cgc	chr5:140427418	cgc
Eif3b	-0.14055	0.0937477									chr5:140442321	gag	chr5:140442322	agc
Eif3b	-0.14055	0.0937477									chr5:140419384	gcc	chr5:140419384	gcc
Srsf3	-0.364446	0.0939546			chr17:29032691	CUG
Galnt1	-0.304726	0.0939559	chr18:24232601	GUG	chr18:24232601	GUG
Phkg2	0.337421	0.094427	chr7:127573859		chr7:127573859		chr7:127573871	atg	chr7:127573871	atg
Fam208a	-0.279005	0.0944875
Fam160b1	-0.272844	0.0954396	chr19:57361223	CGG	chr19:57361223	CGG
Adgra2	-0.266848	0.0954704
Actr3	-0.190567	0.0965019			chr1:125435503	CUG
Rps21	0.537883	0.0965019									chr2:180258259	gga	chr2:180258259	gga
Ubxn4	-0.177974	0.0966129			chr1:128244243	ACG			chr1:128244473	atg
Ubxn4	-0.177974	0.0966129	chr1:128244373	CGA	chr1:128244373	CGA
Ubxn4	-0.177974	0.0966129	chr1:128244406	GUG	chr1:128244406	GUG
Ubxn4	-0.177974	0.0966129	chr1:128244339	CGG	chr1:128244339	CGG
Macf1	-0.651675	0.0966421
Larp4b	-0.303219	0.0971147	chr13:9093942	UCU	chr13:9093942	UCU					chr13:9122158	ttg	chr13:9122158	ttg
Atp11c	-0.335043	0.0973645
Rpl10	1.19808	0.0975797	chrX:74270860	CGC	chrX:74270860	CGC					chrX:74271712	aga	chrX:74271712	aga
Rpl10	1.19808	0.0975797	chrX:74270806	AGG	chrX:74270806	AGG					chrX:74271713	gat
Ecd	-0.298736	0.0977461	chr14:20348019	AUG	chr14:20348019	AUG					chr14:20328932	ctc	chr14:20328932	ctc
Arl1	-0.344136	0.0979844			chr10:88731402	GUU
Csf2rb2	0.319423	0.0981839											chr15:78298203	atg
Zfp771	0.424021	0.0982369
Abce1	-0.29021	0.0983435			chr8:79708551	CUU					chr8:79687714	tct	chr8:79687714	tct
Abce1	-0.29021	0.0983435	chr8:79711565	CUG	chr8:79711565	CUG							chr8:79701223	tct
Abce1	-0.29021	0.0983435	chr8:79711586	CGC	chr8:79711586	CGC
Abce1	-0.29021	0.0983435	chr8:79711678	AGG	chr8:79711678	AGG
Leprot	0.232857	0.098362									chr4:101647810	aag	chr4:101647810	aag
Pphln1	-0.283011	0.098362	chr15:93398450	GGC	chr15:93410700		chr15:93410712	atg	chr15:93410712	atg
Arl15	0.322041	0.0985934									chr13:113794649	gga	chr13:113794649	gga
Arl15	0.322041	0.0985934											chr13:114154764	atg
Arl15	0.322041	0.0985934									chr13:113794672	atg	chr13:113794672	atg
Snap29	-0.264808	0.0986752
Fxr1	-0.300002	0.0987392									chr3:34020146	aca	chr3:34020146	aca
Ints3	-0.304951	0.0990056
Glud1	-0.308577	0.0993498			chr14:34310828	CUG
Nubp1	-0.32212	0.0995856
Ssfa2	-0.278872	0.100203											chr2:79636048	atg
Kpna1	-0.300125	0.100405									chr16:36000189	aaa	chr16:36000189	aaa
Brd3	-0.382998	0.100751
Tfrc	-0.25906	0.100808	chr16:32613178		chr16:32613178		chr16:32613190	atg	chr16:32613190	atg
Psat1	-0.147674	0.101049									chr19:15924923	agc	chr19:15924923	agc
1200014J11Rik	-0.238066	0.101185
Gtf3a	0.285018	0.1012									chr5:146950539	atg	chr5:146950539	atg
Gtf3a	0.285018	0.1012									chr5:146948826	tcg	chr5:146948826	tcg
Gtf3a	0.285018	0.1012									chr5:146948798	gtg
Usp45	-0.253973	0.101251
Swi5	-0.16493	0.101663	chr2:32287960	CUG	chr2:32287960	CUG					chr2:32279097	cta	chr2:32281780	agg
Swi5	-0.16493	0.101663			chr2:32287984	CUG					chr2:32279097	cta	chr2:32281780	agg
Arl14ep	-0.239725	0.101786			chr2:106974280	ACC							chr2:106969455	aaa
Zmynd11	-0.24312	0.101994
Rnf5	0.465691	0.102075			chr17:34603502	CGA
Cdc7	-0.328333	0.102232
Ankrd10	-0.311311	0.102236	chr8:11635737	CGC	chr8:11635737	CGC
Ankrd10	-0.311311	0.102236	chr8:11635651	GUG	chr8:11635651	CGU
Rnf128	-0.297292	0.102456
Rexo4	-0.235381	0.102571									chr2:26964253	aag
Wars	-0.169164	0.102642	chr12:108888545	CUG	chr12:108888545	CUG	chr12:108888487	atg	chr12:108888486	atg	chr12:108888451	ttc	chr12:108888451	ttc
Spns1	-0.263569	0.102681	chr7:126377396	CUG	chr7:126377396	CUG
Net1	-0.260883	0.102755
Slc16a1	-0.163295	0.102861	chr3:104638759	CUG	chr3:104638759	CUG
Slc16a1	-0.163295	0.102861	chr3:104638682	CGG	chr3:104638683	GGU
Sgk3	-0.24365	0.103142			chr1:9865132	UUU					chr1:9865258	atg	chr1:9865258	atg
Sgk3	-0.24365	0.103142			chr1:9865139	AUU
Sfmbt1	-0.25237	0.103276	chr14:30765970	AGA	chr14:30765970	AGA
Mfn1	-0.239546	0.103813	chr3:32529482	AGA	chr3:32529483	GAC					chr3:32531913	ctg
Nxpe4	0.309492	0.103936			chr9:48388928	CUG
Nxpe4	0.309492	0.103936			chr9:48362132	AUG
Nrf1	-0.266914	0.104054	chr6:30088941	AGA	chr6:30088941	AGA							chr6:30089945	tgg
Rps17	1.63972	0.104167									chr7:81345204	gca	chr7:81345204	gca
Esco1	-0.326203	0.1043
Inpp5b	-0.174722	0.1043									chr4:124751640	atg	chr4:124751640	atg
Inpp5b	-0.174722	0.1043									chr4:124751667	cgc	chr4:124751667	cgc
Kat8	-0.241142	0.104718
Bloc1s6	0.345847	0.105361	chr2:122738530	AUG	chr2:122738530	AUG
Zfp668	-0.368706	0.105361
Eef1b2	-0.28664	0.106525	chr1:63177134	CUG							chr1:63179588	aac
Eef1b2	-0.28664	0.106525	chr1:63177110	CUG	chr1:63177110	CUG					chr1:63179561	gta	chr1:63178526	gat
Acsl4	-0.296945	0.106548	chrX:142390352	GUG	chrX:142390308	ACA
Acsl4	-0.296945	0.106548	chrX:142390308	ACA	chrX:142390352	GUG
Polr1b	-0.161998	0.1067									chr2:129101089	cgg	chr2:129101089	cgg
Ints7	-0.179069	0.106938	chr1:191575845				chr1:191575857	atg			chr1:191575863	aag	chr1:191575863	aag
Lrrk1	-0.343668	0.106938
Mtif2	-0.285032	0.107098	chr11:29526428	ACC	chr11:29526425	AUG
Ankrd9	-0.428965	0.10712	chr12:110978929	GUG	chr12:110978911	CGC
Hint1	0.304096	0.107314											chr11:54866537	aag
Hint1	0.304096	0.107314									chr11:54866495	aag	chr11:54866495	aag
Upf2	-0.316666	0.107497
Skiv2l2	-0.28795	0.107521									chr13:112883238	caa
Skiv2l2	-0.28795	0.107521									chr13:112927298	aaa	chr13:112927298	aaa
Slc25a15	-0.334247	0.107521
Stt3b	-0.320411	0.107706									chr9:115243982	ttt	chr9:115243982	ttt
Mrpl44	-0.230947	0.107806
Trpc4ap	-0.174704	0.108299	chr2:155692319		chr2:155692319		chr2:155692307	atg	chr2:155692307	atg
Pnpo	0.297473	0.108404	chr11:96943934	UUG	chr11:96943934	UUG					chr11:96942511	atg	chr11:96943844	gga
Mlh3	0.337621	0.108698
Gna15	-0.254593	0.108765	chr10:81524031	AGA	chr10:81524031	AGA
Nsun2	-0.274712	0.108766									chr13:69619462	aac	chr13:69612140	gac
Nsun2	-0.274712	0.108766											chr13:69612346	atc
Uck2	-0.307321	0.109095	chr1:167284931	GUG
Gmps	-0.294752	0.10926			chr3:63976222	CUG
Arhgef25	0.252184	0.109577
Sccpdh	-0.23132	0.109577			chr1:179668344				chr1:179668356	atg
Slc25a46	-0.282654	0.109661
Eif2s1	-0.172595	0.10992	chr12:78862133	GGG	chr12:78862133	GGG					chr12:78866533	gat	chr12:78866532	aga
Pogz	-0.317387	0.10992											chr3:94853953	ctg
Rragc	-0.234647	0.10998
Polr2b	0.154501	0.11006	chr5:77310573	AAG	chr5:77310573	AAG			chr5:77310614	atg	chr5:77310626	tat	chr5:77310626	tat
Gtpbp2	0.378597	0.1103
Rpl14	-0.430716	0.110547									chr9:120572177	aga	chr9:120572177	aga
Hace1	-0.322345	0.11065			chr10:45577930	GGC
Ercc6l2	-0.299962	0.110744
Samhd1	-0.289825	0.110841			chr2:157135194				chr2:157135182	atg
Eif4e2	0.297937	0.110926	chr1:87214385	CUG	chr1:87214385	CUG	chr1:87214000	atg	chr1:87214000	atg	chr1:87219600	aga	chr1:87219600	aga
Eif4e2	0.297937	0.110926	chr1:87213939	AGA	chr1:87213939	AGA
Mapk8ip3	0.398316	0.111251
E2f8	-0.257905	0.111971	chr7:48880771	GGC	chr7:48880952	AGG
Naa60	0.358032	0.111983	chr16:3884750	CUG	chr16:3884750	CUG
Ing1	0.331592	0.112363
Cdk4	-0.277311	0.11271	chr10:127063677	AUG	chr10:127063677	AUG					chr10:127064272	atg	chr10:127064272	atg
Cdk4	-0.277311	0.11271	chr10:127063636	CUG	chr10:127063636	CUG
Rfc1	-0.288633	0.112793
Cdc27	-0.273455	0.112886	chr11:104550474	CGG	chr11:104550474	CGG
Hipk3	-0.292953	0.113013
Armc1	-0.25728	0.113072	chr3:19163011	GUG	chr3:19163011	GUG
Armc1	-0.25728	0.113072	chr3:19162936	CGG	chr3:19162936	CGG
Armc1	-0.25728	0.113072	chr3:19162960	AUG
Ryk	-0.348253	0.113311
Nisch	-0.163562	0.114019									chr14:31206660	ctc	chr14:31206660	ctc
Nisch	-0.163562	0.114019									chr14:31173597	ttc
Trmt61a	-0.245421	0.114617	chr12:111678392	ACU	chr12:111678392	ACU					chr12:111678634	tac
Rpl35a	-0.495182	0.114911
Mettl16	-0.294003	0.114962									chr11:74773561	ctg	chr11:74773561	ctg
Ankrd46	-0.281049	0.115181
Tfpi	-0.186293	0.1152	chr2:84476749	GUG	chr2:84476749	GUG
Arfip1	-0.264853	0.115473									chr3:84548020	aaa	chr3:84548020	aaa
Reps1	-0.411155	0.115473
Hbp1	0.319965	0.116031											chr12:31950198	ata
Wtap	-0.255892	0.116517	chr17:12992147	GGC	chr17:12992147	GGC
Wtap	-0.255892	0.116517			chr17:12992097	CUG
Srp19	0.242382	0.116523	chr18:34331205		chr18:34331206		chr18:34331217	atg	chr18:34331218	atg
Apba3	0.479491	0.117125			chr10:81268796	GGA
Zfp800	-0.252489	0.117519	chr6:28261829	CUG	chr6:28261829	CUG
Zkscan3	0.312549	0.117519									chr13:21394897	agg
Letm1	-0.284043	0.117641			chr5:33782614	AUC
Letm1	-0.284043	0.117641	chr5:33782696	UUG	chr5:33782696	UUG
Eif3f	-0.260113	0.117784	chr7:108934420		chr7:108934420		chr7:108934432	atg	chr7:108934432	atg	chr7:108934587	gta
Sec61g	0.912501	0.117985			chr11:16508097	AUG
Rexo1	-0.305905	0.117997
Chd7	-0.324287	0.118359	chr4:8690536	AUC	chr4:8690536	AUC
Reep6	0.239356	0.118359
Erap1	-0.280281	0.118574	chr13:74639878	AAG	chr13:74639878	AAG
Ak3	-0.281416	0.11866	chr19:29047871	CUG	chr19:29047871	CUG
Npepl1	-0.335702	0.118862					chr12:84772867	atg	chr12:84772867	atg
Nup98	-0.304436	0.119136			chr7:102210029	UUU					chr7:102138862	gta
Nup98	-0.304436	0.119136	chr7:102210058	CUG	chr7:102210057	CUG					chr7:102138862	gta
Sf3b3	-0.269386	0.11921	chr8:110846751	GUG	chr8:110846751	GUG
Ttc7	-0.347584	0.119228
Rab1b	0.185078	0.119315											chr19:5106938	atg
Rbck1	0.278982	0.119447									chr2:152331030	aga	chr2:152331030	aga
Calm3	0.291402	0.120056	chr7:16923886	UCC	chr7:16923936	CGG					chr7:16917684	agg	chr7:16917684	agg
Calm3	0.291402	0.120056	chr7:16923938	CGC	chr7:16923886	UCC
Pip5k1a	-0.239049	0.12019	chr3:95106656	GUG	chr3:95106656	GUG
Pip5k1a	-0.239049	0.12019			chr3:95106744	ACG
Pip5k1a	-0.239049	0.12019	chr3:95106537	AGA	chr3:95106537	AGA
Pip5k1a	-0.239049	0.12019			chr3:95106600	CUG
Usf2	-0.338664	0.120563
Stom	0.169803	0.12066	chr2:35336932				chr2:35336920	atg
Nfat5	0.331778	0.120704
Kdelc1	-0.23571	0.121551	chr1:44118534	CUU	chr1:44118534	CUU	chr1:44118499	atg	chr1:44118499	atg
Ice1	-0.28212	0.121767
Ankrd13a	-0.303032	0.12263											chr5:114797887	ttt
Taf10	0.645921	0.12263									chr7:105744298	gcg	chr7:105744298	gcg
Gpatch4	-0.244167	0.12272
Crkl	-0.261786	0.122727			chr16:17452098	AUC
Atad2b	-0.295027	0.122832
Cetn2	-0.173001	0.122858	chrX:72918426	AUG	chrX:72918426	AUG
Adss	-0.284897	0.123015			chr1:177796407				chr1:177796395	atg	chr1:177784965	atg	chr1:177796350	cgc
Arid1b	-0.24448	0.123101
Fbxl3	0.251165	0.123206	chr14:103099493	CUG	chr14:103099493	CUG
Gde1	0.300372	0.123248
Dctn2	-0.160412	0.123557									chr10:127266499	aat	chr10:127266499	aat
Atp5d	-0.286436	0.123772	chr10:80142419	CGC	chr10:80142419	CGC
Pi4ka	-0.286997	0.124202									chr16:17295416	gag
Tra2b	-0.292084	0.124202			chr16:22265885	GUG
Dhx32	-0.258029	0.124207			chr7:133776681	CGA
Sema4d	-0.354199	0.124313	chr13:51793621	CUG	chr13:51793621	CUG
Sema4d	-0.354199	0.124313	chr13:51763287	AUG	chr13:51763287	AUG
Sema4d	-0.354199	0.124313			chr13:51725493	AUG
Rffl	-0.289764	0.124332
Chek2	-0.209618	0.124749	chr5:110840043		chr5:110840043		chr5:110840055	atg	chr5:110840055	atg
Idh3b	-0.15389	0.12498
2810004N23Rik	0.313903	0.125095									chr8:124861206	atg	chr8:124861206	atg
2810004N23Rik	0.313903	0.125095									chr8:124862931	ctg
Tprn	-0.445856	0.125141
Bcap29	-0.157479	0.125242			chr12:31634628	AUC
Bcap29	-0.157479	0.125242	chr12:31634607	CGG	chr12:31634607	CGG					chr12:31634331	tat
Amz2	-0.355241	0.12542			chr11:109426988	CGU
Amz2	-0.355241	0.12542	chr11:109426384	AUG	chr11:109426384	AUG
Rps6ka3	-0.257937	0.125513	chrX:159255910	GUG	chrX:159255910	GUG
Hnrnpll	-0.282274	0.125517
Aarsd1	-0.286834	0.126673											chr11:101417162	atg
Aarsd1	-0.286834	0.126673											chr11:101417211	ctg
Vps37b	0.241935	0.126843											chr5:124032201	cgc
Bcl2l1	0.277411	0.126992	chr2:152830035	AUG	chr2:152830035	AUG
Bcl2l1	0.277411	0.126992	chr2:152830093	CUG
Uhrf1bp1l	-0.337788	0.127185
Hmgcr	-0.255779	0.127609									chr13:96650621	caa	chr13:96650623	ttc
Hmgcr	-0.255779	0.127609									chr13:96666530	gtg	chr13:96658905	gga
Hmgcr	-0.255779	0.127609									chr13:96666605	atg	chr13:96666605	atg
Hmgcr	-0.255779	0.127609									chr13:96656680	act	chr13:96666673	atg
Hmgcr	-0.255779	0.127609									chr13:96659300	ttg
Vps54	-0.331526	0.128112	chr11:21239054	AGG	chr11:21239234	GGA
Vps54	-0.331526	0.128112			chr11:21239054	AGG
Ift20	0.287753	0.128426			chr11:78538859								chr11:78538859	ttt
Ikzf1	-0.282311	0.128662	chr11:11686448	AAA	chr11:11686448	AAA							chr11:11707888	atg
Ikzf1	-0.282311	0.128662			chr11:11686176	AUG
Ikzf1	-0.282311	0.128662	chr11:11686217	AAA	chr11:11686217	AAA
1810026J23Rik	0.248125	0.12874									chr9:21592967	aga
1810026J23Rik	0.248125	0.12874									chr9:21593033	aag
Gnas	-0.271253	0.128921									chr2:174343280	cag	chr2:174343280	cag
Gnas	-0.271253	0.128921									chr2:174341668	aaa	chr2:174341668	aaa
Gnas	-0.271253	0.128921									chr2:174345243	ctg	chr2:174334277	gcg
Churc1	0.290852	0.129227
Rxrg	0.272856	0.12934	chr1:167598450	AUG	chr1:167598450	AUG
Ggps1	0.307104	0.129365	chr13:14063275	GUG	chr13:14063278	AUG
Rabl6	-0.272162	0.130266
Ube2g2	0.253734	0.13053	chr10:77622333	CGA	chr10:77622333	CGA					chr10:77622379	aag	chr10:77622379	aag
Pak1	-0.328629	0.130676	chr7:97843075	CUG
Wdr60	-0.278019	0.131354
Man2a2	-0.287757	0.131464	chr7:80370847	CUG	chr7:80370847	CUG
Ptov1	-0.279992	0.131566
Cggbp1	-0.347833	0.13206	chr16:64855561		chr16:64852158	AGG	chr16:64855573	atg	chr16:64855573	atg
Dhx30	-0.275566	0.132075
Ints5	-0.234138	0.133024	chr19:8893057		chr19:8893057		chr19:8893069	atg	chr19:8893069	atg
Srprb	-0.285731	0.13319
Ube2h	0.348629	0.134743	chr6:30304471	GAG	chr6:30304471	GAG
Ak6	0.307698	0.134758
Pex19	0.251352	0.134866									chr1:172126815	aac
Prps2	-0.212893	0.134866									chrX:167382586	ttc	chrX:167382586	ttc
Heca	-0.376006	0.134898
Ccdc82	0.25695	0.134966	chr9:13247006	AAG	chr9:13247006	AAG							chr9:13252085	gaa
Aida	1.11843	0.135018
Otud4	-0.301448	0.135436	chr8:79639682	AUG	chr8:79639682	AUG
Focad	-0.233213	0.13549	chr4:88094672	AUA	chr4:88094672	AUA
Acot7	-0.283213	0.135618
Npat	0.287242	0.136338											chr9:53537163	agg
Pabpc4	-0.563995	0.136945	chr4:123283273	UUG	chr4:123283569	CUG					chr4:123286687	atg	chr4:123286687	atg
Pabpc4	-0.563995	0.136945	chr4:123283354	AGU	chr4:123283354	AGU
Pabpc4	-0.563995	0.136945	chr4:123283249	GUG
Slc48a1	0.328372	0.136987
Stk25	-0.287242	0.13721	chr1:93635655	CUG	chr1:93635655	CUG
Txnip	-0.29873	0.13721	chr3:96558006	AUU	chr3:96558006	AUU
Txnip	-0.29873	0.13721	chr3:96558048	CUU	chr3:96558048	CUU
Txnip	-0.29873	0.13721	chr3:96558081	UUG	chr3:96558133	CGG
Cnpy2	0.211873	0.137603		CUC	chr10:128322716	GGC
Cnpy2	0.211873	0.137603			chr10:128322637	CUC
Sf3a3	-0.268405	0.137856
Cirh1a	-0.28061	0.138006									chr8:106894602	gag	chr8:106894602	gag
Ecsit	0.249047	0.138034	chr9:22084193	AUG
Ecsit	0.249047	0.138034	chr9:22084108	AUG	chr9:22084107	AUG
Zc3h18	-0.278137	0.138034			chr8:122376718	CUG
Tmed5	-0.172084	0.13824
Msantd4	-0.251359	0.138283	chr9:4383600	GUG	chr9:4383600	UUG
Mthfd1	-0.133292	0.138283	chr12:76255445	CUG	chr12:76255445	CUG							chr12:76255539	agg
Cers5	-0.24194	0.138474
Srp72	-0.272652	0.138474									chr5:76974750	ctg	chr5:76974750	ctg
Utp3	-0.274483	0.138763	chr5:88554573	UUG	chr5:88554573	CUU							chr5:88554614	cac
Gsg2	-0.286444	0.13879
Jak1	-0.267099	0.139102			chr4:101193855	GAA					chr4:101153555	aca
Rps26	-0.322313	0.139132			chr10:128626697	AUA					chr10:128626229	cgc	chr10:128626237	aca
Spata5	-0.284648	0.139595
Vps33b	-0.217739	0.139595	chr7:80269689	AUG	chr7:80269689	AUG
Rabgap1l	-0.162685	0.139781	chr1:160792789	CUG	chr1:160792789	CUG
Rabgap1l	-0.162685	0.139781	chr1:160740931	AUG	chr1:160740931	AUG
Agpat1	-0.425281	0.139854
Alkbh5	-0.250966	0.140308	chr11:60538236	GCG	chr11:60538236	GCG
Fdx1	-0.239372	0.140351	chr9:51963521	CUG	chr9:51963521	CUG
Herc2	-0.323232	0.140539
Gnb4	-0.228668	0.140948	chr3:32602114				chr3:32602102	atg			chr3:32602096	ctg	chr3:32602096	ctg
Polr2i	0.317012	0.14141									chr7:30232358	ctg	chr7:30232358	ctg
Cdk13	-0.29431	0.141616	chr13:17805000	AUG	chr13:17805000	AUG
Mark2	-0.271375	0.141621	chr19:7341670	UUU	chr19:7341673	AUG
Mark2	-0.271375	0.141621			chr19:7341390	CUG
Cops3	-0.156189	0.141688									chr11:59839703	tcc	chr11:59839700	gac
Cops3	-0.156189	0.141688											chr11:59839724	tgg
Magt1	-0.162456	0.141688									chrX:106011755	tgg	chrX:106011755	tgg
Picalm	-0.264031	0.141688	chr7:90130561		chr7:90130561		chr7:90130573	atg	chr7:90130573	atg
Atxn10	-0.291976	0.141769	chr15:85336408	CUG	chr15:85336409	CUG
Mrps30	-0.264126	0.142244											chr13:118387234	ggt
Hsdl2	-0.234386	0.142526
Nup133	-0.270236	0.142766									chr8:123899392	atg
Cdkn2a	0.287448	0.142802			chr4:89282173	CUG					chr4:89294450	atc	chr4:89294450	atc
Mrpl51	-0.30557	0.142856
Csf2rb	0.286612	0.143526	chr15:78335063	AGG	chr15:78335063	AGG
Arhgef2	-0.241984	0.143541	chr3:88621246		chr3:88621246		chr3:88621258	atg	chr3:88621258	atg
Oaf	0.239063	0.143541	chr9:43239759	GUG	chr9:43239830	CGG
2310061I04Rik	-0.256362	0.143879
Ruvbl2	-0.271886	0.143879	chr7:45434380	AUG	chr7:45434556	AUC					chr7:45431356	atg	chr7:45431356	atg
Vasp	0.232423	0.144128	chr7:19271845	AUG	chr7:19271845	AUG					chr7:19264803	tgc	chr7:19264803	tgc
Mis18bp1	-0.278018	0.144705	chr12:65172463	AGG	chr12:65161950		chr12:65161938	atg	chr12:65161938	atg
Ube3b	-0.304007	0.144877
Mrps34	0.341948	0.14498			chr17:24895156				chr17:24895168	atg
Ung	-0.236494	0.14498											chr5:114130503	aga
Zcchc17	0.297633	0.14551	chr4:130359922	AUG	chr4:130359922	AUG	chr4:130354201	atg	chr4:130354202	atg
Tmem60	0.271742	0.145886	chr5:20882566	AAG	chr5:20882566	AAG
Tmem60	0.271742	0.145886	chr5:20882586	CUG	chr5:20882585	CUG
Atp2b4	-0.2682	0.145888	chr1:133753375	AGA	chr1:133753375	AGA	chr1:133753282	atg	chr1:133753282	atg	chr1:133753207	cga	chr1:133731901	caa
Mms19	-0.257605	0.145936
Fam65a	-0.16213	0.146365	chr8:105614408		chr8:105614408		chr8:105614420	atg	chr8:105614420	atg
Tarsl2	-0.253014	0.146525
C2cd4a	0.272359	0.146917	chr9:67832350	CUG	chr9:67832350	CUG							chr9:67831757	cgg
C2cd4a	0.272359	0.146917	chr9:67832323	CGC	chr9:67832323	CGC
C2cd4a	0.272359	0.146917	chr9:67832267	ACC	chr9:67832267	ACC
C2cd4a	0.272359	0.146917	chr9:67831791	UUC	chr9:67831794	GGG
Mcm10	0.254606	0.147093	chr2:5010730	UCU	chr2:5010752	CUG					chr2:5008802	ctg	chr2:5008802	ctg
Mcm10	0.254606	0.147093			chr2:5010730	UCU
Tomm7	0.323618	0.147167									chr5:23844071	aaa	chr5:23844071	aaa
Prkd3	-0.31932	0.147215
Srfbp1	-0.247828	0.147621	chr18:52465708		chr18:52465708		chr18:52465720	atg	chr18:52465720	atg
Cdk9	-0.246115	0.147674
Rad1	-0.25697	0.147746			chr15:10486101	CUU
Rad1	-0.25697	0.147746	chr15:10486080	GUG	chr15:10486080	GUG
Vps25	0.252006	0.147746	chr11:101253742		chr11:101253742		chr11:101253754	atg	chr11:101253754	atg
Prkcq	-0.151571	0.148172
Chordc1	-0.268924	0.148551			chr9:18292385				chr9:18292397	atg
Trappc10	-0.283508	0.148728
Pola1	-0.282672	0.148763									chrX:93463303	ctg	chrX:93632094	ctg
Pola1	-0.282672	0.148763									chrX:93420585	cca	chrX:93420585	cca
Rab22a	-0.277206	0.148904
Morf4l1	-0.324814	0.149189	chr9:90114701	AUG
Nfkb1	-0.266108	0.149291									chr3:135667780	tac	chr3:135667780	tac
Scd1	-0.269759	0.149664	chr19:44407822	GAA	chr19:44407822	GAA			chr19:44407410	atg	chr19:44406715	gag	chr19:44406715	gag
Scd1	-0.269759	0.149664	chr19:44407574	ACA	chr19:44407574	ACA
Scd1	-0.269759	0.149664	chr19:44407493	ACG	chr19:44407493	ACG
Scd1	-0.269759	0.149664			chr19:44407465	GAU
Scd1	-0.269759	0.149664	chr19:44407446	GUG	chr19:44407446	GUG
Scd1	-0.269759	0.149664			chr19:44407640	AUA
Rfc2	0.15625	0.149927									chr5:134582803	cca	chr5:134582803	cca
Rfc2	0.15625	0.149927											chr5:134586929	atg
BC003965	0.354389	0.149955									chr17:25184877	att	chr17:25184617	cgg
BC003965	0.354389	0.149955									chr17:25184617	cgg	chr17:25184876	cat
Nudt5	-0.161738	0.150069			chr2:5845368	GUG	chr2:5854859	atg	chr2:5854859	atg
Nudt5	-0.161738	0.150069	chr2:5845304	CUG	chr2:5845304	CUG
Nudt5	-0.161738	0.150069			chr2:5854817	AAG
Wdr43	-0.277849	0.150601
Tmem158	-0.582244	0.152114	chr9:123260715	CUG	chr9:123260715	CUG
Gabpa	-0.267274	0.152155			chr16:84835533	CUG					chr16:84839121	ata	chr16:84839121	ata
Rrp7a	0.282423	0.152199
Baz1a	-0.281908	0.152771									chr12:54898548	tgg	chr12:54898548	tgg
Baz1a	-0.281908	0.152771									chr12:54898504	gct	chr12:54898504	gct
Baz1a	-0.281908	0.152771									chr12:54900035	tct	chr12:54900035	tct
Baz1a	-0.281908	0.152771									chr12:54896032	act	chr12:54975382	cga
Lgals8	-0.239319	0.153235
Lamp1	-0.264074	0.153928			chr8:13159307	GUG
Ppp4r2	-0.361686	0.153928	chr6:100833653	GUG	chr6:100833653	GGU
Zfp146	-0.266976	0.153928	chr7:30162722	AUG	chr7:30162722	AUG
Zfp146	-0.266976	0.153928	chr7:30163086	UAU
Spint2	0.265704	0.154356
Bcas3	-0.166665	0.15452	chr11:85353189	CUG	chr11:85353189	CUG
Abcf1	-0.26848	0.1547									chr17:35963992	aga	chr17:35963992	aga
Ssbp3	-0.28212	0.155134			chr4:106911589	GCU
Fundc2	0.283842	0.15536											chrX:75391681	atg
Dcaf6	-0.258462	0.155478			chr1:165460476	AUG
Hdgfrp2	-0.214996	0.156237
Psma6	-0.135836	0.156646	chr12:55398878	CUG	chr12:55398878	CUG
Amotl1	-0.247486	0.156876
Nup93	-0.262593	0.156913	chr8:94227664		chr8:94227664		chr8:94227676	atg	chr8:94227676	atg	chr8:94227721	act	chr8:94227721	act
Matr3	-0.262292	0.157109
Prep	-0.266242	0.15745									chr10:45155638	aac
Pitrm1	-0.263877	0.157672											chr13:6548180	ggc
Pitrm1	-0.263877	0.157672									chr13:6549585	atg	chr13:6549585	atg
Mettl3	-0.212906	0.157924
Rps7	0.415449	0.157932	chr12:28635919	AUG	chr12:28635858				chr12:28635846	atg	chr12:28635637	ccc	chr12:28631636	gtt
Snd1	-0.267221	0.158062									chr6:28886414	cag	chr6:28886414	cag
Acd	0.382035	0.158293
Impdh2	-0.42663	0.15837											chr9:108560555	acg
Pja2	-0.201417	0.15837
Ube3a	-0.291985	0.158521	chr7:59229039	CGA	chr7:59229040	GAC					chr7:59271999	atg
Eif3m	-0.269161	0.15919									chr2:105014782	atg
Eif3m	-0.269161	0.15919									chr2:105014900	gct	chr2:105014900	gct
Wdr7	-0.160649	0.159276
Rpl5	-1.37202	0.159386	chr5:107900544	GUA	chr5:107900544	GUA					chr5:107903398	ata
Mvd	-0.263218	0.15942
Cnbp	-0.237058	0.159457			chr6:87850938	GUG	chr6:87845780	atg			chr6:87845762	cga	chr6:87845762	cga
Cnbp	-0.237058	0.159457	chr6:87850997	AUA	chr6:87850997	AUA
Zcchc6	-0.240233	0.159596	chr13:59822092		chr13:59822092		chr13:59822080	atg	chr13:59822080	atg
Haus1	-0.213136	0.160809
Myh10	-0.291954	0.160883	chr11:68692114	CUG
Ankrd52	-0.308099	0.161164			chr10:128377185	AUG
Smim10l1	-0.627004	0.161164
Zfp628	-0.455388	0.161276			chr7:4917474	AAA
Rapgef6	-0.242704	0.161469	chr11:54522953	AUU			chr11:54523049	atg	chr11:54523049	atg
Rapgef6	-0.242704	0.161469	chr11:54522996	AUG	chr11:54522996	AUG
Sowaha	0.355806	0.161533
St3gal2	-0.278231	0.161811			chr8:110957317	CUG
Ctu2	-0.288516	0.161861
Bccip	0.268277	0.162023									chr7:133709520	tga	chr7:133709472	aca
Rbm33	-0.280626	0.162616									chr5:28317406	ttt	chr5:28317406	ttt
Gga2	-0.246487	0.162722	chr7:122021143	UUG	chr7:122021142	UUG	chr7:122021088	atg	chr7:122021088	atg
Nol8	-0.255969	0.162792			chr13:49653395	AUG
Ubac2	-0.239151	0.162874									chr14:121878758	ctt	chr14:121878758	ctt
Ppp1r9b	-0.30282	0.16303	chr11:94991090	AUG	chr11:94991090	AUG
Yaf2	0.324721	0.16309
Noc2l	-0.141188	0.163175									chr4:156237379	aag	chr4:156237379	aag
Noc2l	-0.141188	0.163175									chr4:156236173	ctg	chr4:156236173	ctg
Noc2l	-0.141188	0.163175									chr4:156237431	tac
Babam1	-0.221964	0.163328			chr8:71396883	CUU
Slc30a9	0.336364	0.16337
4930430F08Rik	-0.212824	0.163408	chr10:100589126					atg
Psmc3	-0.141813	0.163512	chr2:91054235		chr2:91054235		chr2:91054248	atg	chr2:91054247	atg
Dbf4	-0.235941	0.164121	chr5:8422571	AUG	chr5:8422571	AUG	chr5:8422512	atg	chr5:8422512	atg
Gpd2	-0.280472	0.164214
Txnl1	-0.258071	0.164563	chr18:63692186		chr18:63692185		chr18:63692174	atg	chr18:63692173	atg	chr18:63679440	cta
Zfp62	-0.320456	0.164706
Ptpn2	-0.175717	0.165265									chr18:67724505	cgg	chr18:67724505	cgg
Esyt1	-0.149178	0.165571
Ap2b1	-0.261337	0.166027									chr11:83308238	agt	chr11:83308238	agt
Ipo7	-0.285729	0.166123									chr7:110052721	gat
Clpx	-0.266325	0.166199			chr9:65294361	UAG
Nae1	-0.227305	0.166199
Vps13c	-0.286281	0.167995									chr9:67921877	ggg	chr9:67860789	aga
Vps13c	-0.286281	0.167995									chr9:67840450	cgc	chr9:67840450	cgc
Med16	-0.208275	0.168046									chr10:79908887	cgt	chr10:79908887	cgt
H2afv	0.244934	0.168432									chr11:6444339	aag	chr11:6444339	aag
Smim15	0.260975	0.168737	chr13:108046467	CUG	chr13:108046467	CUG
Smim15	0.260975	0.168737	chr13:108044481	AUG	chr13:108044481	AUG
Zcchc11	-0.302436	0.168945
Klhdc3	-0.263773	0.169684			chr17:46680874	CGG
Klhdc3	-0.263773	0.169684	chr17:46680822	CUG	chr17:46680822	CUG
Klhdc3	-0.263773	0.169684	chr17:46680763	CUG	chr17:46680763	CUG
Pcbp2	-0.243621	0.169759	chr15:102473321		chr15:102473321
Vapa	-0.282728	0.170124
Smarca5	-0.273051	0.170789	chr8:80739327	GUG	chr8:80739327	GUG					chr8:80705228	gga	chr8:80736763	atg
Rab28	-0.339075	0.171115
Slc25a17	0.211658	0.171361	chr15:81360743		chr15:81360742		chr15:81360731	atg	chr15:81360730	atg
Mllt3	0.213733	0.171524	chr4:87806251	AGG	chr4:87806251	AGG	chr4:87791963	atg	chr4:87791963	atg
Leo1	-0.269013	0.171581	chr9:75441565		chr9:75441565		chr9:75441577	atg	chr9:75441577	atg	chr9:75441587	tcg	chr9:75441587	tcg
Prmt5	-0.143507	0.171581
Shc1	0.225294	0.172922	chr3:89418689	AGA	chr3:89418689	AGA
Shc1	0.225294	0.172922	chr3:89418645	AUC	chr3:89418396	AUG
Shc1	0.225294	0.172922	chr3:89421728	CUG
Ube2d3	-0.276255	0.173083			chr3:135439709	GGA					chr3:135463008	atc
Ube2d3	-0.276255	0.173083	chr3:135439659	GAA	chr3:135439659	GAA					chr3:135455218	ggt	chr3:135455218	ggt
Ube2d3	-0.276255	0.173083			chr3:135438678	ACG
Cyp51	-0.242346	0.173452	chr5:4104320		chr5:4104320		chr5:4104308	atg	chr5:4104308	atg
Zfpm1	-0.310324	0.173774
Parn	-0.30522	0.173997	chr16:13668095	CGC	chr16:13668094	GCG
Tstd2	-0.247214	0.174898			chr4:46135584	CUG					chr4:46135533	atg
Sec14l1	-0.247603	0.175078
Myh9	-0.254776	0.175436									chr15:77767496	ctc	chr15:77767496	ctc
Myh9	-0.254776	0.175436									chr15:77783396	cgg	chr15:77783396	cgg
Myh9	-0.254776	0.175436									chr15:77766789	gca	chr15:77766789	gca
Myh9	-0.254776	0.175436									chr15:77813204	aag	chr15:77813204	aag
Myh9	-0.254776	0.175436									chr15:77768918	ctg
Pigu	-0.244971	0.175447
Psmd11	-0.258541	0.175678			chr11:80428652				chr11:80428664	atg	chr11:80428676	ttc	chr11:80428676	ttc
Banf1	0.276453	0.176256	chr19:5365952		chr19:5365952		chr19:5365940	atg	chr19:5365940	atg	chr19:5365130	tga	chr19:5365130	tga
Ppid	-0.267863	0.176987
Cox14	0.315657	0.177786	chr15:99725659	CUC	chr15:99725659	CUC					chr15:99727673	tac
Cox14	0.315657	0.177786	chr15:99725816	GGC	chr15:99725816	GGC
Cox14	0.315657	0.177786	chr15:99725803	AUC
Ap2s1	0.149741	0.178283
Olfm1	-0.279213	0.178283	chr2:28193192	AUG	chr2:28193192	AUG
Senp3	-0.271447	0.178356	chr11:69681733	AAA	chr11:69681728	CUA
Senp3	-0.271447	0.178356	chr11:69681793	ACG	chr11:69681793	ACG
Rasa3	-0.235054	0.178436									chr8:13677436	cgg	chr8:13677436	cgg
Rasa3	-0.235054	0.178436											chr8:13677417	gga
Gemin5	-0.255432	0.178576									chr11:58121634	cgt
Gemin5	-0.255432	0.178576									chr11:58121719	cct	chr11:58121719	cct
Eif3c	-0.232606	0.17896	chr7:126566401	GUG	chr7:126566401	GUG					chr7:126563749	aag	chr7:126563749	aag
Ctcf	-0.258668	0.179366	chr8:105643525	AAG
Ftl1	-0.500349	0.179476			chr7:45459797	CGG
Ndc80	-0.256348	0.17955	chr17:71526776	GUG	chr17:71526776	GUG
Med27	0.197308	0.180571
Zfp106	-0.276996	0.180651			chr2:120563718	GGA
Naca	0.269066	0.180735			chr10:128035660	AUC
Pcm1	-0.286475	0.180801
Pqbp1	0.259088	0.181103	chrX:7899252				chrX:7899240	atg			chrX:7896386	atc	chrX:7896383	ctg
Dnlz	0.253506	0.181121			chr2:26352024				chr2:26352012	atg
Ttc9c	-0.256857	0.181268			chr19:8819176	CAG
Vps26b	-0.239468	0.181553			chr9:27029979	CUG
Tpr	-0.295188	0.181861	chr1:150392894	GUA	chr1:150392894	GUA
Alg11	0.23508	0.182234											chr8:22060757	ggt
Alg11	0.23508	0.182234									chr8:22061909	atg	chr8:22061909	atg
Nle1	-0.256134	0.182234
Lyl1	0.268282	0.182291	chr8:84701930	CUG	chr8:84701856	AAC					chr8:84702703	ctg	chr8:84702703	ctg
Lyl1	0.268282	0.182291			chr8:84701930	CUG
Tomm34	-0.278412	0.182652
Ddx1	-0.24784	0.182908									chr12:13219516	ttc
Rhog	0.253547	0.183001
Acaa1a	-0.240145	0.184351	chr9:119341454	AAG	chr9:119341454	AAG
Wtip	-0.492866	0.18447
Btrc	0.19104	0.185103									chr19:45456548	atg	chr19:45456548	atg
Btrc	0.19104	0.185103											chr19:45471066	tga
Srrm2	-0.334322	0.185127			chr17:23803394	AAC					chr17:23818316	agg	chr17:23808112	agg
Srrm2	-0.334322	0.185127									chr17:23816252	tca
Srrm2	-0.334322	0.185127									chr17:23818523	cag
Srrm2	-0.334322	0.185127									chr17:23818808	tct
Srrm2	-0.334322	0.185127									chr17:23818223	cct
Srrm2	-0.334322	0.185127									chr17:23819294	acc
Srrm2	-0.334322	0.185127									chr17:23817485	tta
Rpl36a	0.742949	0.185146
Foxp4	-0.292625	0.185263	chr17:47924418	CUG	chr17:47924418	CUG
Tusc1	0.41851	0.18592	chr4:93335819	AUG	chr4:93335819	AUG
Ptdss1	0.234405	0.1861	chr13:66933260	AUG	chr13:66933260	AUG							chr13:66933517	gga
Ppat	-0.13541	0.186121									chr5:76915227	tgg	chr5:76915227	tgg
Pip4k2c	-0.206457	0.18617
Cyba	0.291599	0.186598									chr8:122432852	cca	chr8:122432852	cca
Timm17b	0.328541	0.186658									chrX:7899445	tcg
Zfp68	-0.282381	0.186721	chr5:138619688	GGC
Ndufs6	0.337838	0.186948									chr13:73328438	cgc	chr13:73328438	cgc
Capza1	-0.495973	0.187492									chr3:104864373	cgg	chr3:104864373	cgg
Trappc8	-0.226734	0.187492
Rsbn1l	0.204639	0.188008									chr5:20951774	cgc	chr5:20951774	cgc
Zcrb1	-0.277306	0.188021									chr15:93391559	aaa	chr15:93391559	aaa
Tab3	-0.312623	0.188162
Arf4	0.139847	0.188388	chr14:26638351	AAG	chr14:26638351	AAG							chr14:26653127	aaa
Arf4	0.139847	0.188388			chr14:26638187	GUG
Ran	-0.251451	0.188388	chr5:129020251	AGA	chr5:129020251	AGA					chr5:129022536	gct	chr5:129020752	gta
Mkln1	-0.238225	0.188447									chr6:31398868	gtg	chr6:31398868	gtg
Mkln1	-0.238225	0.188447									chr6:31477992	tca	chr6:31477992	tca
Mkln1	-0.238225	0.188447											chr6:31507728	ctg
Top2a	-0.238438	0.188531	chr11:99024106	UUC	chr11:99024106	UUC					chr11:99024055	gta	chr11:99001401	tct
Tsc2	-0.218858	0.188548
Ddx42	-0.265474	0.189232	chr11:106217054	CUG	chr11:106217054	CUG	chr11:106224098	atg	chr11:106224098	atg
Znf512b	-0.331369	0.189544
Polg	-0.261836	0.190387	chr7:79466093	AGC	chr7:79466093	AGC
Kpna3	-0.249277	0.190454
Nub1	-0.243384	0.191535	chr5:24689382		chr5:24689381		chr5:24689394	atg	chr5:24689393	atg
Prrc1	-0.202456	0.191579	chr18:57362441				chr18:57362453	atg
Rpl13a	-0.26143	0.191839	chr7:45128727		chr7:45128727		chr7:45128715	atg	chr7:45128715	atg	chr7:45127258	ggc	chr7:45126499	acc
Mrps16	-0.328431	0.192412
Rcc1	-0.158596	0.192412	chr4:132345648		chr4:132345648		chr4:132345636	atg	chr4:132345636	atg
Cd48	-0.215832	0.192639											chr1:171682114	ctg
Capzb	-0.124844	0.192956
Cers2	0.246917	0.193054									chr3:95320153	aag	chr3:95320153	aag
Bmp2k	-0.236919	0.19368	chr5:96997847	CGG	chr5:96997847	CGG
Ehbp1l1	-0.15134	0.194686	chr19:5726109	ACC	chr19:5726109	ACC
Ehbp1l1	-0.15134	0.194686	chr19:5726243	ACG	chr19:5726243	ACG
Pml	0.227165	0.195196
Tecr	-0.251027	0.195542	chr8:83594366		chr8:83594366		chr8:83594354	atg	chr8:83594354	atg
Spg7	-0.251084	0.195631
Atad1	-0.250449	0.195849	chr19:32707009		chr19:32707009		chr19:32706997	atg	chr19:32706997	atg
Dennd1a	-0.244699	0.195855
Clcn2	-0.214517	0.196217									chr16:20715948	cga	chr16:20715948	cga
Fkrp	0.441073	0.196353
Rab5a	0.224648	0.196361	chr17:53483862	UAG	chr17:53483862	UAG
Rab5a	0.224648	0.196361	chr17:53479352	AGG	chr17:53479352	AGG	chr17:53483912	atg	chr17:53483912	atg
Diablo	0.287799	0.196681									chr5:123524108	ctc	chr5:123524109	act
Ptpn12	-0.225461	0.197335
Ctdsp1	0.260578	0.19864									chr1:74391900	gtc	chr1:74391900	gtc
Tspan32	0.253899	0.19864	chr7:143005837	GUG	chr7:143005838	GUG
Tspan32	0.253899	0.19864	chr7:143005744	GGC	chr7:143005747	CUC
Lrch3	-0.24018	0.198798							chr16:32914141	atg	chr16:32914171	tac	chr16:32914171	tac
Naa30	-0.214055	0.198852
Golph3	-0.25146	0.19909			chr15:12321517	AGG					chr15:12321900	ccc	chr15:12321900	ccc
Pon2	0.219756	0.19909
Xpo1	-0.262905	0.199103	chr11:23256596	GUG	chr11:23256596	GUG					chr11:23296050	ggg	chr11:23296050	ggg
Xpo1	-0.262905	0.199103	chr11:23256445	AUG	chr11:23255945	AUG
Kif11	-0.252246	0.199325	chr19:37376544	AGU	chr19:37376544	AGU					chr19:37413279	aca
Dusp8	-0.660824	0.199327	chr7:142095163	GCG	chr7:142095163	GCG
Ranbp3	0.150316	0.199373	chr17:56673292	CGC	chr17:56673292	CGC							chr17:56696635	atg
Rtel1	0.227902	0.19947											chr2:181321033	tgt
Scamp4	0.237418	0.19947	chr10:80602923	CGG	chr10:80602924	GGG	chr10:80608843	atg	chr10:80608843	atg			chr10:80609389	atg
Alg2	-0.212608	0.199631
Zw10	-0.2204	0.200793	chr9:49055671		chr9:49055671		chr9:49055683	atg	chr9:49055683	atg	chr9:49055694	ttg
Cdc34	-0.297293	0.201247
Prdm2	-0.217546	0.201508			chr4:143194682				chr4:143194670	atg
Myeov2	0.374663	0.201865
Snw1	-0.240704	0.202166											chr12:87468709	aga
Tmem194	-0.214486	0.202526
Aldh18a1	-0.134165	0.202738	chr19:40588398	CGU	chr19:40588398	CGU					chr19:40585576	gca
Atp5e	0.254184	0.203064	chr2:174464052	AAG	chr2:174464052	AAG
Pdcd6ip	-0.243963	0.203243
Uqcr10	0.291055	0.203502									chr11:4704295	cgc	chr11:4704295	cgc
Ptpn9	-0.248422	0.203616
Fads3	-0.194709	0.204288	chr19:10041683	ACG	chr19:10041683	ACG
Dync1li2	-0.154218	0.204429									chr8:104437490	atg	chr8:104437490	atg
Tbc1d9b	-0.238698	0.205109
Ncbp1	-0.241569	0.205728	chr4:46138818	CGG	chr4:46138818	CGG
Ccdc85b	0.297832	0.206167
Samd14	0.302538	0.206726			chr11:95010099	CUG
Btf3l4	2.01149	0.207018
Asph	-0.243399	0.208256			chr4:9668960	AGG
Stim1	-0.208952	0.208329	chr7:102267937	CUG	chr7:102267937	CUG
Stim1	-0.208952	0.208329	chr7:102268192	UUG	chr7:102268192	UUG
Stim1	-0.208952	0.208329	chr7:102268395	UAC
Stim1	-0.208952	0.208329	chr7:102268322	CUG
Elof1	0.222384	0.208407
Slc20a2	-0.285113	0.208407	chr8:22535072	CGU	chr8:22535072	CGU
Gsk3a	-0.232879	0.208424									chr7:25233890	act
Col4a3bp	-0.201695	0.208468
Dag1	-0.270579	0.208676			chr9:108218406	AUG
Rps11	-0.26246	0.208676									chr7:45124302	gtg	chr7:45124302	gtg
Dnaja3	-0.204371	0.209102
Pip4k2a	-0.237186	0.209592	chr2:18998008		chr2:18998008		chr2:18997996	atg	chr2:18997996	atg
Pak2	-0.244551	0.209828	chr16:32052375				chr16:32052363	atg
Nadk	-0.210477	0.209885									chr4:155577024	aag	chr4:155577024	aag
Fam188a	0.245051	0.209891											chr2:12419249	aag
Sox6	0.233353	0.209954
Atp8a1	-0.22939	0.210093	chr5:67847223		chr5:67847223		chr5:67847211	atg	chr5:67847211	atg
Atxn2	-0.219508	0.210157
Ddost	-0.245627	0.210157	chr4:138304865		chr4:138304865		chr4:138304877	atg	chr4:138304877	atg
Dmxl1	-0.259832	0.210215
Rabggtb	0.267116	0.210251	chr3:153912204	CUG	chr3:153912204	CUG
Actr8	-0.214991	0.210645
Agfg2	0.192612	0.210991	chr5:137684611	AGA	chr5:137684611	AGA
Orc3	-0.249994	0.211082									chr4:34607222	gga
Orc3	-0.249994	0.211082									chr4:34614879	agg	chr4:34614879	agg
Rap2c	-0.211759	0.211082	chrX:51017910		chrX:51017910		chrX:51017898	atg	chrX:51017898	atg
Cyb5r4	-0.326137	0.211278
Nt5c2	-0.134955	0.211444	chr19:47015081	AAG	chr19:47015081	AAG			chr19:46950944	atg
Nt5c2	-0.134955	0.211444	chr19:46962286	CGA	chr19:46962286	CGA
Nt5c2	-0.134955	0.211444	chr19:47015035	AUG	chr19:47015035	AUG
Pdia6	-0.241862	0.211644
Becn1	-0.202606	0.211724	chr11:101302238	AUG	chr11:101302238	AUG
Ltn1	-0.253095	0.211886									chr16:87394539	ctc
Farsb	-0.132198	0.211951									chr1:78482325	aaa	chr1:78482325	aaa
Fip1l1	-0.241972	0.212166									chr5:74535688	cgc
Polr1d	0.242154	0.212685	chr5:147077586	AUG	chr5:147077586	AUG
Cdyl	-0.259901	0.213069
Cdk1	-0.133117	0.213102	chr10:69352850	AGG	chr10:69352850	AGG	chr10:69350133	atg	chr10:69350133	atg
Cdk1	-0.133117	0.213102	chr10:69352870	GUG	chr10:69352870	GUG
Mettl9	-0.284236	0.213188
Timm23	2.45444	0.213188									chr14:32201734	aaa	chr14:32201734	aaa
Ggact	0.210808	0.213659
Map2k5	-0.233025	0.213705	chr9:63377650	ACG	chr9:63377650	ACG							chr9:63377207	aag
Map2k5	-0.233025	0.213705			chr9:63377519	CUC
Srbd1	-0.242318	0.213734
Tnfaip2	-0.136919	0.213941									chr12:111444991	ctg	chr12:111444991	ctg
Tnfaip2	-0.136919	0.213941											chr12:111445123	aag
Smim20	0.245486	0.214061											chr5:53267244	gga
Napg	-0.237093	0.214694	chr18:62977914	UCU	chr18:62977914	UCU							chr18:62977983	ctg
40057	-0.186633	0.214799
Pcbp1	0.255506	0.215151									chr6:86525885	cca
Crnkl1	-0.146641	0.215341	chr2:145934643	AUC	chr2:145934643	AUC
Frrs1	-0.207937	0.215356	chr3:116866229	AUG	chr3:116866229	AUG
Frrs1	-0.207937	0.215356			chr3:116866191	UAG
Rfc4	-0.248228	0.215435	chr16:23127694	AAG	chr16:23127694	AAG					chr16:23127527	aag	chr16:23127527	aag
Sertad2	0.331461	0.215435
Polr2a	-0.260892	0.215501	chr11:69758455		chr11:69758606
Polr2a	-0.260892	0.215501			chr11:69758455
Luc7l	-0.219791	0.21561	chr17:26252933	CUG	chr17:26252933	CUG
Abhd17a	-0.346665	0.215626	chr10:80590261	CAG	chr10:80590261	CAG
4930579G24Rik	-0.352888	0.21565
Fbxw5	0.223445	0.215833									chr2:25502042	tgc
Ndufa3	-0.238877	0.215972									chr7:3617617	cct
Cdk8	-0.260575	0.216043	chr5:146231284	AUG	chr5:146231284	AUG
Ak2	-0.13317	0.21616	chr4:128993272	CUG	chr4:128993272	CUG					chr4:128993350	ctt	chr4:128993350	ctt
Sec13	0.145349	0.216567									chr6:113737966	cat	chr6:113737966	cat
Sec13	0.145349	0.216567									chr6:113736478	acg	chr6:113736478	acg
Sec13	0.145349	0.216567									chr6:113737987	acc	chr6:113737987	acc
Vars	-0.233688	0.216659									chr17:35015472	gaa	chr17:35014271	tgc
Vars	-0.233688	0.216659									chr17:35001752	ata
Wdr36	-0.136221	0.217462	chr18:32837366	AUC	chr18:32837366	AUC					chr18:32837405	cgc	chr18:32837405	cgc
Sla	-0.247414	0.217559
Gata1	-0.131025	0.21877	chrX:7967819	ACC	chrX:7967820	UAC
Aagab	-0.200988	0.218864
Man1a2	-0.231844	0.219199	chr3:100684926	UUG	chr3:100685125	GAU
Man1a2	-0.231844	0.219199	chr3:100685177	AAG	chr3:100685177	AAG
Sptlc1	-0.192192	0.219423
Ptpn7	-0.253605	0.219434			chr1:135132729	CUG
Ssbp2	0.200258	0.219434
Dclre1b	-0.228411	0.220425			chr3:103809230	AUG
Dclre1b	-0.228411	0.220425	chr3:103809372	AUG	chr3:103809372	AUG
Nat10	-0.133846	0.22075			chr2:103761152	CUC
Nat10	-0.133846	0.22075	chr2:103761132	CUG	chr2:103761132	CUG
Sart3	-0.226258	0.220888	chr5:113771648		chr5:113771648		chr5:113771636	atg	chr5:113771636	atg
Lmnb2	-0.201752	0.221014
Scaf1	0.214421	0.221266									chr7:45013579	cga	chr7:45013579	cga
BC037034	-0.307311	0.221636
Ilf2	-0.254213	0.221727			chr3:90476228				chr3:90476240	atg
Zc3h13	-0.263014	0.221727			chr14:75284462	CUG
Atp9b	-0.232269	0.221815	chr18:80934021	CUG	chr18:80933981	CUG
9430020K01Rik	-0.210177	0.221821	chr18:4635007	GGG	chr18:4635007	GGG
Ppwd1	-0.234393	0.2222
Dars	-0.233142	0.222262	chr1:128417328	CUG	chr1:128417329	CUG
Dars	-0.233142	0.222262	chr1:128417306	AGG	chr1:128417306	AGG
Guf1	-0.260134	0.222262
Taf15	-0.278074	0.222991	chr11:83473187		chr11:83473187		chr11:83473199	atg	chr11:83473199	atg
Smarcc1	-0.241213	0.223069	chr9:110132105		chr9:110132104		chr9:110132117	atg	chr9:110132116	atg
Slmap	-0.252883	0.223791
Cct5	-0.203899	0.223872									chr15:31598046	gca	chr15:31598046	gca
Cct5	-0.203899	0.223872									chr15:31594376	aag	chr15:31594376	aag
Cct5	-0.203899	0.223872									chr15:31601649	cgc	chr15:31592924	aac
Cct5	-0.203899	0.223872									chr15:31593611	tgg	chr15:31590997	gtt
Cct5	-0.203899	0.223872									chr15:31590952	tct	chr15:31590952	tct
Cct5	-0.203899	0.223872									chr15:31597553	gtg	chr15:31597553	gtg
Cct5	-0.203899	0.223872									chr15:31594112	cag
Cct5	-0.203899	0.223872									chr15:31594453	ttg
Cct5	-0.203899	0.223872									chr15:31601697	gcc
Med7	-0.212226	0.2239			chr11:46437180	AUC
Med7	-0.212226	0.2239	chr11:46439898	AUG	chr11:46439898	AUG
Wdr74	-0.14042	0.223934											chr19:8737697	aag
Uba3	0.203393	0.22463									chr6:97205347	agg	chr6:97205347	agg
Uba3	0.203393	0.22463									chr6:97203561	cgc	chr6:97203561	cgc
Pigyl	0.306623	0.224897	chr9:22157799	CUG	chr9:22157799	CUG
Pigyl	0.306623	0.224897	chr9:22157821	CUG	chr9:22156892	CUG
Pigyl	0.306623	0.224897	chr9:22157843	GUG	chr9:22157843	GUG
Rpa1	-0.227276	0.224897	chr11:75348268		chr11:75348268		chr11:75348256	atg	chr11:75348256	atg
Srgn	0.247173	0.224937									chr10:62507705	ggc	chr10:62507705	ggc
Mycbp2	-0.218365	0.225245
Rela	-0.211481	0.225245	chr19:5637517	CUG	chr19:5637517	CUG
Med19	0.235805	0.22525									chr2:84678453	ttt	chr2:84678453	ttt
Fkbp8	0.252659	0.225602	chr8:70529401		chr8:70529401		chr8:70529413	atg	chr8:70529413	atg	chr8:70529419	ccc
Socs2	-0.672236	0.225602
Melk	-0.231924	0.225689	chr4:44301029	UUC	chr4:44301020	UCG
Stk40	-0.317317	0.225689
Ywhab	-0.230009	0.226474	chr2:164011649		chr2:163995310	CUG					chr2:164011622	aaa	chr2:164011622	aaa
Ywhab	-0.230009	0.226474									chr2:164011649	cgc
Ttc3	-0.205471	0.22675			chr16:94370837	CUG
Inpp4b	0.226013	0.226776											chr8:81770892	agg
Inpp4b	0.226013	0.226776											chr8:81768119	ctg
Ppp1r12a	-0.24637	0.226804	chr10:108162201	CUG	chr10:108162201	CUG					chr10:108162405	aag	chr10:108162405	aag
Ptprcap	0.365086	0.227008	chr19:4154689		chr19:4154688		chr19:4154701	atg	chr19:4154700	atg
Smc2	-0.258823	0.22715	chr4:52439297	UUC	chr4:52439297	UUC
Smc2	-0.258823	0.22715	chr4:52440202	UUG	chr4:52440202	UUG
Sp1	-0.240481	0.22715									chr15:102407795	tga	chr15:102407795	tga
Lrrc59	-0.250301	0.227424	chr11:94629951	UCG							chr11:94630024	ccg	chr11:94630023	tcc
Usp15	-0.234838	0.227506											chr10:123196904	ctg
Usp15	-0.234838	0.227506									chr10:123196892	cgt	chr10:123196891	gtt
Fam193a	-0.245229	0.22803
Etf1	-0.220728	0.228415	chr18:34931954	AUG	chr18:34931954	AUG					chr18:34914103	act	chr18:34914103	act
Cwc22	-0.209828	0.228643			chr2:77936702	AGG
Cwc22	-0.209828	0.228643			chr2:77936660	AAG
Ranbp10	0.194398	0.229058
Slc38a2	-0.239358	0.229232			chr15:96698810	GCC
Slc38a2	-0.239358	0.229232	chr15:96699544	AUA	chr15:96699544	AUA
Slc38a2	-0.239358	0.229232	chr15:96699658	AUU	chr15:96699658	AUU
Pgd	0.131354	0.229527											chr4:149166082	ctg
Rnf11	-0.429819	0.229629
Xpot	-0.241508	0.229974	chr10:121626141	CGA	chr10:121626141	CGA					chr10:121622874	gag
Arhgap9	0.208005	0.230149									chr10:127325142	agg	chr10:127325142	agg
Rnpepl1	0.315205	0.230304
Sypl	-0.1931	0.23041	chr12:32954278		chr12:32954278		chr12:32954290	atg	chr12:32954290	atg
Slc33a1	0.188948	0.230717
Prpf3	-0.137622	0.231184	chr3:95855761	GUG	chr3:95855761	GUG
Mt1	0.241454	0.231202	chr8:94179299		chr8:94179299		chr8:94179311	atg	chr8:94179311	atg
Fam76b	-0.367813	0.231689
Sod2	-0.12605	0.232239	chr17:13008033		chr17:13008033		chr17:13008045	atg	chr17:13008045	atg
Caprin1	-0.223346	0.232317	chr2:103797514	CUG	chr2:103797514	CUG	chr2:103796941	atg	chr2:103796941	atg	chr2:103796917	aaa	chr2:103796917	aaa
[truncated: 4,077 more rows]
